# Supplementary material for: Genome-wide nucleosome map and cytosine methylation levels of an ancient human genome
Source: PubMed Central journal article supplement — Genome Res. 2014 Mar;24(3):454–66. doi: 10.1101/gr.163592.113 (PMC3941110; doi:10.1101/gr.163592.113), 2014-03
Supplement: supp_gr.163592.113_SuppMaterial.pdf [file supp_gr.163592.113_SuppMaterial.pdf]

# Genome-wide Nucleosome Map and Cytosine Methylation Levels of an Ancient Human Genome

Jakob Skou Pedersen, Eivind Valen, Amhed M. Vargas Velazquez, Brian J. Parker, Morten Rasmussen, Stinus Lindgreen, Berit Lilje, Desmond J Tobin, Theresa K. Kelly, Søren Vang, Robin Andersson, Peter A. Jones, Cindi A. Hoover, Alexei Tikhonov, Egor Prokhortchouk, Edward M. Rubin, Albin Sandelin, M. Thomas P. Gilbert, Anders Krogh, Eske Willerslev, Ludovic Orlando.

## Table of Contents

|                                                                    |              |
|--------------------------------------------------------------------|--------------|
| <b>Section S11. Sequence datasets</b>                              | <b>3-8</b>   |
| 1.1. Saqqaq Palaeo-eskimo sequence dataset                         | 3            |
| 1.2. Control genome dataset                                        | 4            |
| 1.3. Ancient Aborigine sequence dataset                            | 4            |
| 1.4. Ancient horse sequence dataset                                | 5            |
| 1.5. Ancient polar bear sequence dataset                           | 6            |
| 1.6. Modern human hair sequence dataset                            | 6            |
| 1.7. Size distributions                                            | 6            |
| Figure S1.1                                                        | 8            |
| <b>Section S12. Nucleosomes</b>                                    | <b>9-25</b>  |
| 2.1. Read depth                                                    | 9            |
| Table S2.1                                                         | 9            |
| Table S2.2                                                         | 9            |
| 2.2. Control of mapping and sequencing biases                      | 10           |
| 2.3. Correlation with other nucleosome data and predictions        | 10           |
| Figure S2.1                                                        | 12           |
| 2.4. Nucleosome occupancy at anchor sites                          | 13           |
| Figure S2.2                                                        | 13           |
| 2.5. Fourier transform                                             | 13           |
| Figure S2.3                                                        | 14           |
| Figure S2.4                                                        | 15           |
| Figure S2.5                                                        | 16           |
| Figure S2.6                                                        | 17           |
| Figure S2.7                                                        | 17           |
| 2.6. Phasograms                                                    | 17           |
| Figure S2.8                                                        | 18           |
| 2.7. Genome-wide map of nucleosomes                                | 19           |
| Figure S2.9                                                        | 19           |
| 2.8. Estimating false positives                                    | 20           |
| Figure S2.10                                                       | 21           |
| 2.9. Nucleotide and di-nucleotide distributions across nucleosomes | 22           |
| Figure S2.11                                                       | 23           |
| Figure S2.12                                                       | 24           |
| Figure S2.13                                                       | 25           |
| <b>Section S13. Methylation footprint of the Saqqaq genome</b>     | <b>26-60</b> |
| 3.1. Background                                                    | 26           |
| Figure S3.1                                                        | 26           |
| 3.2. Nucleotide mis-incorporation patterns                         | 26           |
| Figure S3.2                                                        | 28           |
| 3.3. Quantifying ancient regional methylation levels               | 29           |
| Figure S3.3                                                        | 30           |

|                                                                            |              |
|----------------------------------------------------------------------------|--------------|
| Figure S3.4                                                                | 31           |
| Figure S3.5                                                                | 32           |
| 3.4. Methylation-based unsupervised hierarchical clustering                | 33           |
| Table S3.1                                                                 | 34           |
| Table S3.2                                                                 | 35           |
| Figure S3.6                                                                | 37           |
| Figure S3.7                                                                | 37           |
| Figure S3.8                                                                | 37           |
| Figure S3.9                                                                | 38           |
| Figure S3.10                                                               | 39           |
| Figure S3.11                                                               | 40           |
| Figure S3.12                                                               | 41           |
| Figure S3.13                                                               | 42           |
| 3.5. Promoter and first exon methylation levels                            | 43           |
| Table S3.3                                                                 | 44           |
| Table S3.4                                                                 | 46           |
| Table S3.5                                                                 | 49           |
| Table S3.6                                                                 | 54           |
| 3.6. Predicting the Saqqaq age at death using age-dependent CpG signatures | 57           |
| Figure S3.14                                                               | 57           |
| Figure S3.15                                                               | 58           |
| 3.7. Methylation profiles across nucleosomes                               | 59           |
| Table S3.7                                                                 | 60           |
| <b>Section S14. Expression analyses</b>                                    | <b>61-89</b> |
| Table S4.1                                                                 | 64           |
| Table S4.2                                                                 | 68           |
| Table S4.3                                                                 | 79           |
| <b>Section S15. References</b>                                             | <b>90-93</b> |

## Section SI1. Sequence datasets

Most of the analyses were performed on previously released sequence data sets, consisting of: 1) the first complete ancient human genome [Rasmussen et al. 2010] (section SI1.1); 2) a modern control data set based on a panel of modern samples [Green et al. 2010, Reich et al. 2010] (section SI1.2). 3) the first ancient Aborigine genome [Rasmussen et al. 2011] (section SI1.3); and 4) genomic reads of a 110,000-130,000 year-old polar bear [Miller et al. 2012] (section SI1.5). In addition, we generated genomic reads from an ancient horse dating back to ca. 4.5 ka (section SI1.4) and from modern human hairs (section SI1.6). Those were analyzed to check for the specificity of the patterns observed in hairs and their possible extension to other types of ancient samples, such as calcified bones that represent the vast majority of fossil remains excavated.

### 1.1. Saqqaq Palaeo-eskimo sequence dataset

The sequence data have been originally generated as part of our characterization of the Saqqaq Palaeo-Eskimo genome [Rasmussen et al. 2010]. Overall, ancient DNA extracts from a 4,000-year-old permafrost-preserved hair were built into Illumina libraries and deep-sequenced at about a 20X-coverage on a GAIIx sequencing platform and Single End sequencing. The vast majority of the sequencing reads (242 lanes out of a total of 245, corresponding to ca. 3.5 billions of reads) were recovered following library amplification with Phusion DNA polymerase (Finnzymes, hereafter referred to as Phusion). A total of 3 GAIIx lanes, however, were generated following library amplification with a *Taq* platinum high-fidelity DNA polymerase (Life technologies, hereafter referred to as Hifi) and resulted in a total number of 50.1 millions of reads [Ginolhac et al. 2011]. Contrarily to Hifi, Phusion has been demonstrated to show poor activity at uracil residues (Figure S3.1) [Fogg et al. 2002]. The latter are generated following *post-mortem* deamination of cytosine residues, mainly at single-stranded overhanging ends. As chemical analogs of thymines, Uracils yield to the mis-incorporation of AT base pairs (instead of GC) during library preparation and amplification, resulting in an excess of GC→AT mismatches when ancient genomes are compared to modern reference genomes [Stiller et al. 2006; Brotherton et al. 2007; Gilbert et al. 2007; Briggs et al. 2007]. Thus, that Phusion, rather than Hifi, has been used for generating the first complete sequence of an ancient genome greatly contributed to the overall quality of the genome by limiting the impact of damage-driven misincorporations in downstream analyses [Rasmussen et al. 2010].

For the nucleosome analysis the original set of 999.3 millions of reads was used, as defined in [Rasmussen et al. 2010]. For the methylation analysis, a mapping procedure allowing for indels was followed as described below (this was performed because the alignments available from the original study were performed with SESAM and were indel-free; [Rasmussen et al. 2010]). Read ends were trimmed for potentially residual adapter sequences, and after the first base showing the poorest quality score (C) using the software AdapterRemoval available for download at <http://code.google.com/p/adapterremoval/> [Lindgren 2012]. Trimmed reads were subsequently mapped against nuclear human genome reference (hg18) using bwa 0.5.9 [Li and Durbin 2010] and default values for optional parameters. Unmapped sequences, together with the high-quality reads previously identified, were remapped against the available mitochondrial genome sequence of this individual [Gilbert et al. 2008] using similar parameters; in addition, sequencing reads with a minimal length of 25 nucleotides, a minimal mapping quality of 30, and showing no alternative hits

were further selected using a combination of the samtools suite and awk command lines. Finally, sequence duplicates were collapsed using the sort and rmdup commands available in SAMtools [Li and Durbin 2010], resulting in a final BAM file of unique mitochondrial reads that was used for some of the analyses presented below aiming at detecting cytosine methylation-driven nucleotide mis-incorporation patterns (section SI3). The final dataset consisted of a final number of 696.0 millions and 26.3 millions of non-clonal unique sequences originating from Phusion and *Taq* Platinum high fidelity (Hifi) library amplification, respectively.

### 1.2. Control genome dataset

We constructed a data set with the same properties as the Saqqaq data set in terms of number of reads and read length distribution, except reads were randomly selected (and truncated to match the Saqqaq size distribution) from a panel of sequencing runs from modern genomes. This data set allowed us to (1) evaluate if the Saqqaq data set observations could be ascribed to mapping biases and also to (2) more generally represent a null set to evaluate the significance of the statistical measurements made during the analysis.

To construct this set, we used the combined set of modern genomes sequenced at low read depth as part of the Neanderthal and Desinova projects, which were downloaded from UCSC [Green et al. 2010, Reich et al. 2010]. All samples originate from lymphoblastoid cell lines of the Human Genome Diversity Project (HGDP). A main criterion for the data sets used for the Control was that they were made using the same technology, but based on modern samples that were not degraded or fragmented. All reads, including unmapped, were extracted from the downloaded bam files and converted to fastq format. These were then shuffled to avoid any ordering relative to genomic coordinates. We then constructed a data set with the same length distribution as the Saqqaq, by truncating individual modern reads to the appropriate size, though we initially included about 1.2 times more reads than present in the Saqqaq data set. We then mapped each fragment size separately to hg18 using BWA [Li et al. 2010]. For each fragment-size set of unsorted mapped reads, we then extracted the exact same number of reads of the given size as present in the Saqqaq data set. Finally, all the reads were combined to make our final Control data set.

### 1.3. Ancient Aborigine sequence dataset

A total number of 311.0 millions of Illumina reads recovered from a ca. 100-years old hair sample originating an ancient Aborigine individual [Rasmussen et al. 2011]. These reads were generated following a procedure similar to the one used for characterizing the complete genome of the *Saqqaq* individual, except that DNA libraries were amplified using *Taq* Gold DNA polymerase. The initial unprocessed data set consisted of 2.1 billions of reads (100 nucleotides long), which was reduced by 85.2% following index filtering, adaptor trimming, and selection of uniquely mapping and non-clonal reads. These span 60% of the human genome with an average read depth of 11x (6.4x overall). The average length of endogenous trimmed and unique reads consisted of 64 nucleotides and mapping was done using BWA and standard parameters.

#### 1.4. Ancient horse sequence dataset

The ancient horse sample was provided by one of the co-authors (Dr. Alexei Tikhonov). It has been found in Yakutia at Batagai (Republic of Sakha) and showed an uncalibrated radiocarbon date of  $4,450 \pm 35$  BP (Gr 50842). A total of 0.225 grams of ulna bone was drilled to powder at low speed in ancient DNA lab facilities available at the Centre for GeoGenetics. DNA was extracted following the silica-based procedure described in [Rohland and Hofreiter 2007], with slight modifications following [Orlando et al. 2009]. DNA was released from silica pellets using a final elution volume of 205ul of EB (QIAGEN) and 15 minutes of incubation at 37°C. We constructed one Illumina DNA library following the standard truSeq procedure, except that 16.5ul of DNA extract were used as input and that the End Repair reaction was performed using End-It End Repair kit reagents from Epicentre (catalog reference ER0720). A first incubation at 4°C for 2 minutes was followed by a second incubation at 37°C for 45 minutes. During those incubation steps, 5'-overhangs were filled-in by T4 DNA polymerase and 5'-ends are phosphorylated by PNK. End-repaired DNA templates were purified using QIAGEN minelute purification kit and 10 volumes of PN buffer instead of 5 volumes of PB buffer. The whole elution volume was used for klenow exo- polyA-tailing (37°C for 30 min) and adapter ligation using standard indexed truSeq adapter. The DNA library was further purified using Ampure XP beads with 1.8:1 as a volume ratio between beads and DNA, and eluted into 20ul of EB solution. We amplified 10ul of DNA library using 300nM Illumina PCR primers (PCR primer 1.0: 5'-AAT GAT ACG GCG ACC ACC GAG ATC TAC ACT CTT TCC CTA CAC GA ; PCR primer 2.0: 5'-CAA GCA GAA GAC GGC ATA CGA GAT), 15 cycles of PCR amplification, a concentration of 1mg/ml BSA, 1µM dXTP (Invitrogen) and 5U of Taq Gold (Invitrogen). Final PCR volume was 25µl and cycling conditions consisted of a first DNA denaturation at 95°C for 10 minutes, followed by 15 cycles of denaturation (95°C, 30 sec), annealing (60°C, 30sec) and elongation (72°C, 60sec). A final elongation was performed at 72°C for 7 minutes before amplified DNA was purified into 25ul EB using QIAGEN minelute purification kit. The DNA library was sequenced on a hiseq2000 platform available at the Danish National DNA Sequencing Centre using 100 cycles Paired-End reactions.

Illumina Paired-end reads were trimmed for adapter sequences at their 3'-end following a pair-wise alignment procedure and using the software AdapterRemoval [Lindgreen 2012]. A minimal sequence identity of 90% over 5-10 nucleotides was required for adapter alignment (this threshold was lowered to 67% for longer alignments). In addition, reads showing stretches of bases with low quality scores and/or Ns at sequence ends were trimmed from the first nucleotide position showing the low quality score. Reads starting with stretches of at least one undetermined base were trimmed, resulting in a final sequence starting at the first position showing a determined base. Following adapter removal, read pairs were aligned and collapsed as long as showing a maximum of one mismatch over a sequence of 11 nucleotides at read ends. A larger fraction of mismatches (33%) were tolerated for longer alignments (>11 nucleotides). Sequence collapse was performed by calling a consensus based on the nucleotide showing the highest quality score; when the two reads showed identical nucleotides, a quality score was re-assigned based on the product of the two previous quality scores but with a maximal limit set-up to a *Phred* score 41 (e.g. when the two nucleotides were sequenced with a 10% chance of error, the base quality score of that position in the consensus was re-assigned to 1%). Read-pairs showing no overlap were discarded. Collapsed-pairs were further

mapped as single-end reads against the horse reference genome EquCab2.0 available for download at UCSC (<http://hgdownload.cse.ucsc.edu/downloads.html#horse>) using BWA and standard parameters, except that the seed was disabled following the recommendations of [Schubert et al. 2012].

### 1.5. Ancient polar bear sequence dataset

We followed the full procedure described in section SI1.4 to characterize the size distribution of endogenous DNA inserts using 812,006,446 Illumina Paired-end reads (SRS347019) generated from the DNA extract of a 110,000-130,000 years old polar bear from Svalbard (Norway) [Miller et al. 2012]. The *de novo* assembled scaffolds of the polar bear genome (available for download at [ftp://climb.genomics.cn/pub/10.5524/100001\\_101000/100008/Ursus\\_maritimus.scaf.a.gz](ftp://climb.genomics.cn/pub/10.5524/100001_101000/100008/Ursus_maritimus.scaf.a.gz)) were used as a reference for read mapping.

### 1.6. Modern human hair sequence dataset

We followed the same experimental procedure as for characterizing the Saqqaq genome. We generated a total number of 10.0 millions correctly indexed, adaptor trimmed, uniquely mapping and non-clonal Illumina reads from a single DNA library prepared on modern hairs from a British born Caucasian living in Denmark at present. Average read length was of 61 nucleotides. These sequences span 15.7% of the human genome with an average read depth of 1.4X (0.22X overall). This dataset was generated in order to evaluate if the nucleosome-driven signal detected on previous datasets was specific to ancient DNA. Single-End sequencing was performed to a lower read depth, sufficient to statistically confirm that the same signal is present. DNA extraction and downstream bioinformatics analysis followed the same protocol as for the ancient Saqqaq Palaeo-Eskimo genome [Rasmussen et al. 2010].

### 1.7. Size distributions

*Saqqaq:* A subset of 116.1 millions of Paired-End reads generated from 4 indexed libraries was considered for analyzing the size distribution of ancient DNA inserts. Pairs of reads showing a minimum overlap of 11 bases (with 100% identity) were collapsed into single reads using AdapterRemoval [Lindgren 2012] following the procedure described in section SI1.4. This resulted in a total number of 83.6 millions of collapsed reads that were mapped against the human reference genome hg18 using *bwa*, following the same parameters as described in section SI1.4. We then randomly selected 1.5 million of unique hits per library (for a total of 6.0 millions of reads) and further filtered for collapsed reads 1) ending with base quality scores of 40 and 41 when shorter than the size of sequencing reads (75 nucleotides) and for longer sizes, 2) those that end with base quality scores of 33-40. We found a total number of 4.8 millions selected collapsed reads, corresponding to endogenous library inserts sequenced over their full length, showing unique high-quality alignments against polar bear scaffolds. The resulting size distribution is shown as Figure 2.d, bottom.

*Ancient Horse:* We focused on collapsed reads showing a sequence length longer than 25 nucleotides and a minimal mapping quality (MQ) of 25. We filtered PCR duplicates using 5'- and 3'-coordinates and keeping the read showing the best

average base quality. This procedure was implemented using a python script kindly provided by Dr. Martin Kircher (*FilterUniqueBAM.py*; for a SAM compatible version, see <https://bioinf.eva.mpg.de/fastqProcessing/>). The size distribution of those collapsed reads mapping uniquely the horse reference genome was plotted using R [R Development Core Team 2012] and a subset of 100,000 reads randomly selected. Corresponding reads are available for download at SRA (SRA105533). Horse inserts showed a remarkable 10-bp size-periodicity spanning 38bp to 142bp (Figure 2.d, top). This periodicity corresponds to the average size of a DNA helix turn. No 10-bp periodicity could be observed for inserts larger than the size of nucleosome (146bp). This pattern suggests that DNA fragmentation in spacer regions occurs randomly in contrast to nucleosome cores where DNA strands facing away from nucleosome protection are exposed to hydrolytic reactions and fragmentation.

*Polar bear:* We noticed that within pairs, the quality of the second read was generally of a lower quality than the first read, with a significant fraction showing lowest quality scores over the full read length. This could result in artifact while collapsing reads, with increased false positive and false negative identification of overlapping read ends. In order to avoid such bias and select collapsed reads with starting and ending coordinates reflecting the full length of DNA library inserts, we further selected from the population of collapsed reads 1) those that end with base quality scores of 40 and 41 when shorter than the size of sequencing reads (101 nucleotides) and for longer sizes, 2) those that end with base quality scores of 38-40. We found a total number of 3.8 millions of selected collapsed reads showing unique high-quality alignments against polar bear scaffolds. Those were considered for plotting insert size distribution (Figure 2.d, middle). A periodicity, similar to the one observed using the ancient horse sequence dataset, although admittedly of a lower magnitude, was observed on 110-130 ka polar bear DNA inserts (38bp-153bp), suggesting long term preservation of nucleosomal positioning signal in ancient DNA extracts. We found the size class of 101 nucleotides slightly over-represented. This likely reflects a sequencing or data-handling artifact, as this class of length corresponds to the number of sequencing cycles performed on the hiseq2000 platform.

Of note, size distributions showing similar ca. 10-bp periodicity were observed for a series of ancient DNA extracts from Holocene and Pleistocene bone material preserved in the permafrost (data not shown).

We constructed similar size distributions for the modern hair data generated in this study as well as for a range of other modern genomes generated from fresh blood using a similar methodology (from different horse breeds; Orlando et al. 2013). Those size distributions are presented for 30-60bp in Figure S1.1 in order to facilitate comparison across samples. The top graphs provide size distributions for the Saqqaq, the ancient polar bear, the ancient horse and the modern hair. The bottom graphs provide size distributions for modern horses. Frequencies have been normalized to peak at 1 for the size showing maximum frequency. The ancient horse show a short-range periodicity at 38, 49 and 59 bp whereas the ancient polar bear show a short-range periodicity at 39, 50 and 60 bp. Similarly, the modern hair also shows a short-range periodicity with peaks at 49 and 60 bp (no reads shorter than 39bp and longer than 60bp were experimentally generated, precluding direct observation of a larger size range). As the horse and polar bear datasets have been generated in absence of size-selection, this clearly rules out size selection as a driver for the short-range periodicity observed in fragment size distributions. Given that no short range periodicity is observed in sequence datasets generated from fresh blood, we conclude that the short range periodicity observed in the modern hair sample originates from active degradation of hair DNA following apoptotic processes

occurring during hair differentiation (Botchkavera et al. 2006). The periodicity observed in Saqqaq, the horse and the polar bear, exactly matches the average turn of a B-DNA helix, with nucleotides facing away from nucleosomes becoming more susceptible to *post-mortem* degradation than nucleotides in contact with nucleosomes. In a similar way, apoptotic enzymes are well known to cause DNA laddering by cleaving chromatin DNA into inter-nucleosomal fragments (Nagata et al. 1998). During this process, nucleosome protection also creates ~ 10-bp periodicity patterns (Aruscavage et al. 2010). This is responsible for the short-range periodicity observed in the modern hair data.

That 1-bp offsets are sometimes observed between the Saqqaq, the ancient horse, the ancient polar bear and the modern hair (with peaks either at 38bp or 39bp, 48-50bp), most likely comes from two causes. First, one helix turn is around 10.4 bases, which is expected to create a mixture of both 10-bp and 11-bp periodicities. Second, our trimming procedure removes any stretch of Ns at read starts and depending on the dataset considered, we observed variable fractions of sequencing starting with one N. Read trimming results in the shortening of the sequence by one nucleotide, creating a proportion of fragments offset by 1 nucleotide in their size distribution.

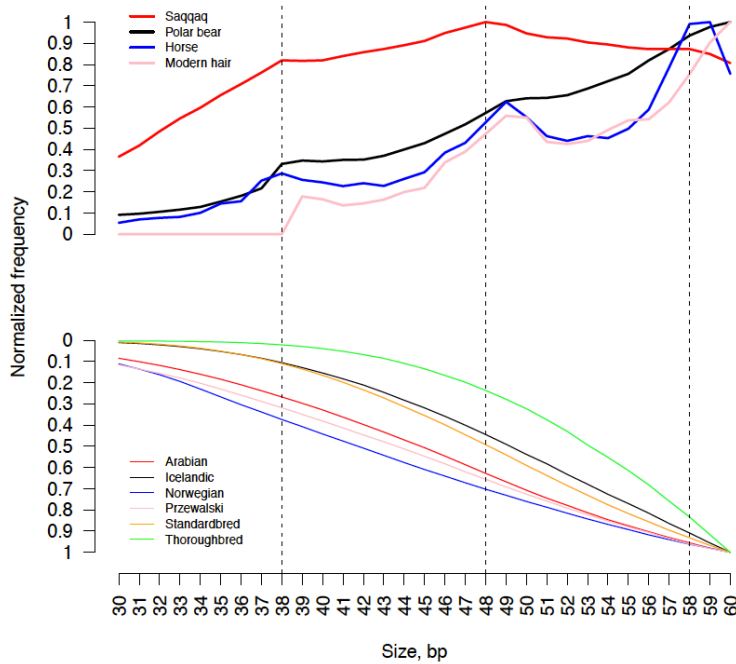

**Figure S1.1.** Size distribution of ancient and modern sequence datasets. Top: Ancient and modern hair sequence datasets. Bottom: Modern blood sequence datasets.



## Section SI2. Nucleosomes

### 2.1. Read depth

We evaluated the average read depth in different genomic regions where read depth is defined as the number of mapped reads covering that region normalized by the region size. We first evaluated read depth at different genic regions, by segmenting the entire genome according to the protein-coding genes of the UCSC Gene set [Fujita et al. 2011]. When multiple genes or isoforms overlapped a region, annotation priority was given as: protein-coding exons (CDS) > 5'UTR > 3'UTR > introns > intergenic regions. In addition, read depth was also evaluated at CpG islands (CGI) as defined by the UCSC Genome Browser.

Read depth was found to vary dramatically between genomic regions for the Saqqaq genome, with the highest read depth observed for CGI. In contrast the Control set displayed a nearly constant read depth across genomic regions, with the lowest read depth observed at CGI. We note that for a wider variety of other genomic datasets, CGI also showed lower mapping rates than the other genomic regions investigated (data not shown). Both the Aboriginal sample and the Modern hair sample largely follow the same read depth pattern as Saqqaq. Finally, a modern human MNase-based nucleosome occupancy data set generally also follows the same pattern, though with less variation between regions.

| Region      | genome    | coding    | intergenic | intron    | 3'UTR     | 5'UTR     | CpG island |
|-------------|-----------|-----------|------------|-----------|-----------|-----------|------------|
| Saqqaq      | 19.4(1.0) | 53.8(2.8) | 17.2(0.9)  | 21.1(1.1) | 26.9(1.4) | 76.8(4.0) | 126.1(6.5) |
| Control     | 19.4(1.0) | 20.7(1.1) | 18.7(1.0)  | 20.3(1.0) | 20.8(1.1) | 18.1(0.9) | 11.5(0.6)  |
| Aboriginal  | 6.9 (1.0) | 17.9(2.6) | 6.1 (0.9)  | 7.6 (1.1) | 9.9 (1.4) | 22.0(3.2) | 32.7(4.8)  |
| Modern hair | 0.2 (1.0) | 0.5 (2.1) | 0.2 (0.9)  | 0.2 (1.0) | 0.3 (1.3) | 0.7 (3.2) | 1.0 (4.5)  |
| Schones     | 2.7 (1.0) | 3.9 (1.5) | 2.6 (1.0)  | 2.7 (1.0) | 3.1 (1.2) | 3.9 (1.5) | 3.8 (1.4)  |

**Table S2.1.**

**Regional read depth for main data sets.** The average read depth across genomic regions is given for each data set. Read depth normalized by genomic average (enrichment) is given in parenthesis. Schones refers to a mapping of human nucleosomes using MNase [Schones et al. 2008].

| Region  | genome | coding | intergenic | intron | 3'UTR | 5'UTR | CpG island |
|---------|--------|--------|------------|--------|-------|-------|------------|
| Saqqaq  | 0.2    | 5.9    | 0.0        | 0.2    | -0.2  | 10.1  | 22.8       |
| Control | 0.6    | 1.0    | 0.5        | 0.8    | 1.3   | 0.4   | -0.6       |

**Table S2.2.**

**GC-normalized read depth for Saqqaq and Control.**

## 2.2. Control of mapping and sequencing biases

To eliminate the effect of any potential mapping biases due to the repetitive structure of the human genome, we defined a set of genomically unique regions (Unique). For all mapping procedures used, we retained only uniquely mapping reads. Using ExactRepeats, a mapping program based on suffix arrays (developed by one of us: Anders Krogh), we defined all regions that are uniquely mappable by reads of length 26 or greater. These regions were further trimmed by 100 bases at either end, ensuring that the observed read depth within these is unaffected by mapping issues. The resulting set spans 51.3% of the genome.

The PCR amplification step of NGS library generation is known to introduce biases in the frequency of occurrence of different fragments dependent on GC-content and length [Benjamini and Speed 2012]. To rule out that such biases could create or contribute to the observed variation and to improve the specificity of the nucleosome signal in the downstream analysis, we evaluated their strength at each position along the genome and corrected the read depth signal accordingly. We achieved this by estimating what the read depth would be at every genomic position given the read length distribution; the location of uniquely mappable regions for every read length; and the GC-content for all possible fragments overlapping a given position. The estimated read depth composed of contributions from all available read lengths were then subtracted from the observed read depth. The resulting read depth was thus positive when more read depth is observed than expected from GC content and negative when less read depth was observed than expected from GC content.

More specifically, we based this evaluation on the GCcorrect package [Benjamini and Speed 2012] implemented in R [R Development Core Team 2012]. Briefly, GCcorrect learns the correlation between GC-content and read depth across the genome and uses it to predict the expected number of reads covering every position of the genome. It disregards non-unique regions based on a mappability file. Since mappability is dramatically different depending on the read length (in Saqqaq ranging from length 20 to 76 bp), we supplied a separate mappability file for each length. ExactRepeats (see above) was used to create these. Reads shorter than 26 bp were discarded from the analysis as there were too few reads for GCcorrect to learn the correlation between read depth and GC content. For each read length, we supplied GCcorrect with the corresponding mappability file and the overall number of observed reads. GCcorrect then returned the expected number of reads starting at any given position for the given read length. The resulting expected read depth summed across all read lengths was calculated using an extension to the UCSC Genome Browser command line tool bedItemOverlapCount, which allowed to sum up genome-wide real-valued data across multiple data sets. This overall expected read depth was subtracted from the observed read depth (disregarding reads shorter than 26), to produce the final GC-corrected read depth. The same procedure was applied to the Control data set, while taking the original fragment sizes in the panel of underlying data sets into account.

## 2.3. Correlation with other nucleosome data and predictions

We evaluated the correlation between different data sets across various genomic regions. Briefly, the following data sets were included in the analysis, (1) The original uncorrected Saqqaq read depth; (2) GC-corrected Saqqaq read depth; (3) The original uncorrected Control read depth; (4) The GC-corrected Control read depth; (4) The original Aboriginal read depth; (5) The read depth of the modern hair sample; (6) GC content in 5 bp windows as available from the UCSC Genome Browser [Meyer et al. 2012]; (7) Computational predictions of nucleosome

occupancy as based on SVM models trained on MNase digestion data from A375 (A375 set) and MDA-kb2 (Dennis set; [Dennis et al. 2007] cell lines; 8) Experimental genome-wide MNase-based occupancy data sets obtained from CD4+ cells [Schones et al. 2008] and lymphoblastoid cell lines [Gaffney et al. 2012]. The Schones data is based on read depth of 25 bp long single-end reads, while the Gaffney data is based on midpoints of paired-end reads (126bp < fragment length < 184bp) smoothed by 30bp, following the authors instructions.

Both Pearson's and Spearman's (data not shown) correlation coefficients were evaluated across large subsets of the genome. As the results were highly similar, we only report Pearson's correlation coefficients (PCC).

We first focused on the conservatively defined Unique regions (see Section S12.2), which span 51% of the genome. These were represented by a random sample of 10,000 regions, in total spanning 7.7 Mb. The results are reported in the main article text.

We next evaluated the correlation across a 20 Kb subsection of a known nucleosome array region (chr12:34,331,000-34,451,000; hg18), where nucleosomes are thought to be consistently and specifically positioned independently of tissue [Gaffney et al. 2012]. To rule out the influence of common mapping biases, we included only the subset of Unique regions (~13 Kb). The resulting correlation matrix (Figure S2.1 a) allows several observations:

1. For both Saqqaq and Control the GC corrected and original read depths are highly correlated.
2. The Saqqaq and Aboriginal data sets are also highly correlated (0.74).
3. Similar levels of correlation are seen for Saqqaq versus the computational nucleosome occupancy predictions (0.77 and 0.74 for uncorrected read depth).
4. The experimental MNase data sets, which are based on related cell types (CD4+ and lymphoblastoid), show a correlation of 0.38 between them and a lower correlation with the computational predictions (0.16-0.28) than Saqqaq. This could suggest some level of noise in state-of-the art MNase-based occupancy maps, potentially from the cutting biases of the MNase enzyme [Gaffney et al. 2012].
5. The correlation of the Saqqaq and Aboriginal data sets against the experimental data sets (pcc of 0.23 to 0.43) is of the same magnitude as the correlation between the two experimental data sets (pcc=0.38).
6. Generally the original, uncorrected Saqqaq data set shows higher levels of correlation with the computational and experimental occupancy maps than the GC corrected Saqqaq data set. This may be attributed to "over-correction" at inherently GC rich nucleosome sites, as GC content is known to be part of the nucleosome-positioning signal [Collings et al. 2010; Valouev et al. 2011]. However, it is also likely that the MNase based data sets, which also underlie the computational predictions, are subject to some level of GC-dependent PCR bias, which is not corrected for.

Finally, we evaluated the correlation in the +/-1Kbp regions around the TSSs of all UCSC transcripts. To illustrate the variance in the correlation coefficients between TSS regions, we plotted the full distribution of PCCs for these. Separate plots were made for the correlation of select data sets against the GC-corrected Saqqaq read depth (Figure 1.f); the original Saqqaq read depth (Figure S2.1.b); and the Schones data set (Figure S2.1.c). Again, the computational predictions stand out with consistently strong positive correlation against the uncorrected

Saqqaq data set across the TSS regions (Figure S2.1.b). The Schones data set shows stronger correlation with the Gaffney data set than with either Saqqaq or the computational predictions (Figure S2.1.c). The nucleosome positioning patterns in TSS regions have been shown to correlate with gene expression levels and hence be cell type specific [Valouev et al. 2011]. The relatively high correlation of Schones and Gaffney in TSS regions may thus be explained by the underlying cell types being related.

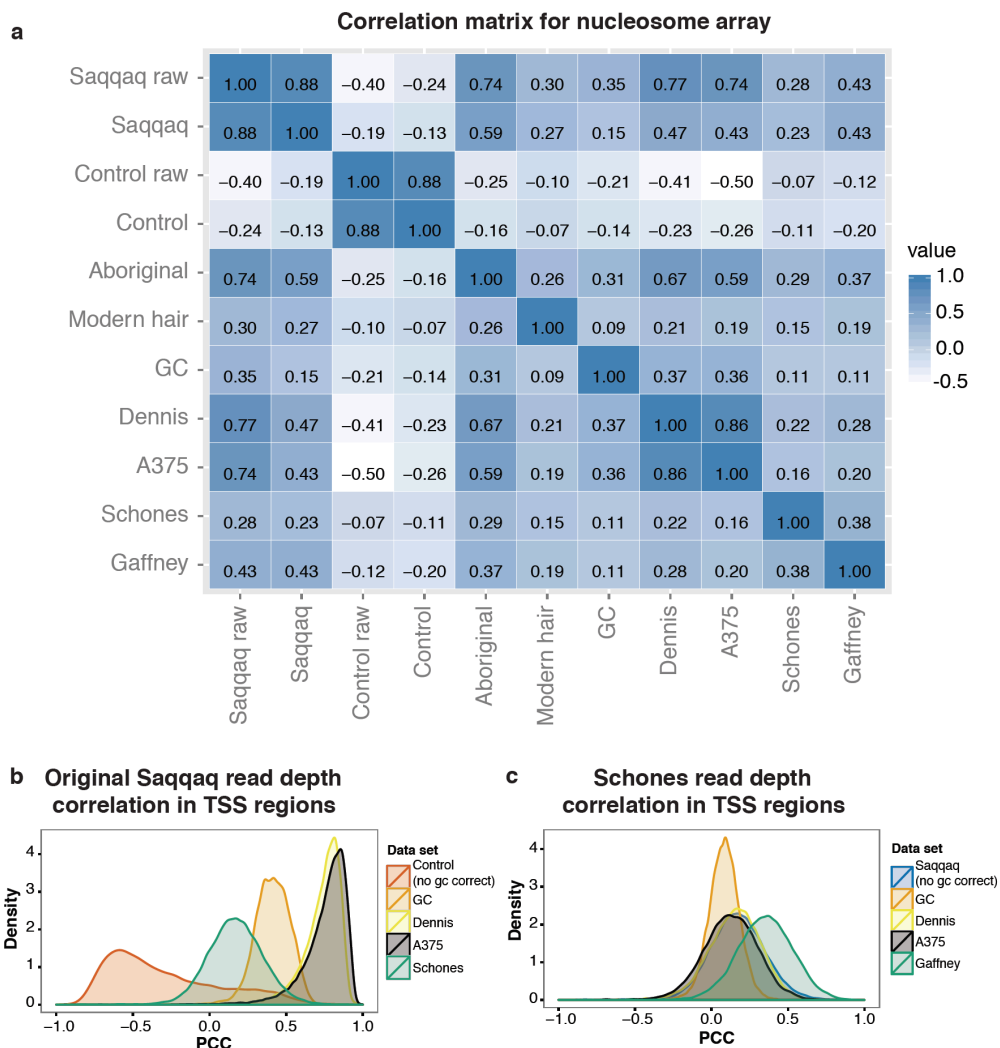

**Figure S2.1**

**Correlation between data sets.**

**a**, Correlation matrix for known nucleosome array region (20 Kb). Pearson's correlation coefficients were calculated for each pairwise combination of data sets and color-coded according to magnitude. All correlations coefficients are significantly different from zero (all p-values < 1.2e-15). **b**, Distributions of Pearson correlation coefficients across TSS regions for original, uncorrected Saqqaq read depth *versus* uncorrected Control set, GC content (GC), two computational occupancy maps (Dennis and A375), and an experimental occupancy map (Schones). **c**, Distribution of Pearson correlation coefficients across TSS regions for Schones *versus* a subset of data sets from (b) and another experimental occupancy map (Gaffney).

## 2.4. Nucleosome occupancy at anchor sites

Nucleosome occupancy, represented by the read depth, was plotted around multiple anchor points in the genome: TSSs, CTCF sites and splice sites. All instances of each group of anchor points were aligned and a meta plot of the accumulated read depth in the surrounding regions divided by the number of anchors was plotted. For TSSs and splice sites we used the UCSC genes set.

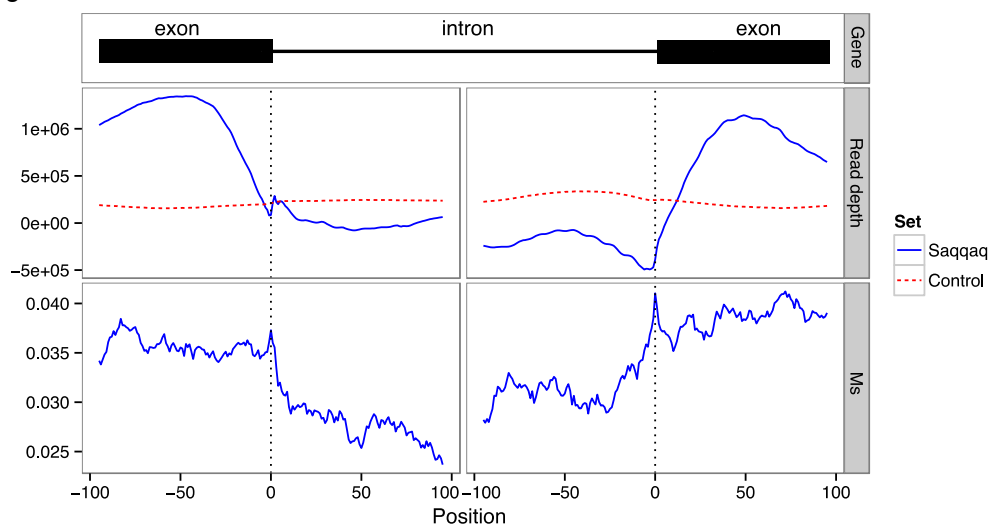

**Figure S2.2**

**Nucleotide and methylation around donor and acceptor splice sites.** Methylation signal is described in sections S13.2 and S13.3.

## 2.5. Fourier Transform

We predicted that nucleosome protection would cause a periodicity in read depth variation corresponding to the size of the nucleosome and the spacer region (~200 bp). To unbiasedly evaluate if such periodicity could be observed, we performed a Fourier transform (FT) analysis using Welch's FT method (a windowed Fourier transform). More specifically, we performed a spectral density plot (periodogram) genome-wide across CpG islands, TSS $\pm$ 1000 bp, gene bodies, and CTCF sites  $\pm$ 1000 bp. The raw spectral density was corrected for the background frequency distribution, to remove low frequency variations and constant offsets, by subtracting a background estimated by exponential curve modeling. To visualize the spatial distribution of frequency information, short time Fourier transforms (spectrograms) over known anchor sites, such as Transcription Start Sites (TSS) (source: UCSC genes) and CTCF binding sites (source: [Fu et al. 2008], see section S13.7), were generated. For Saqqaq and Control the GC-corrected read depth was used.

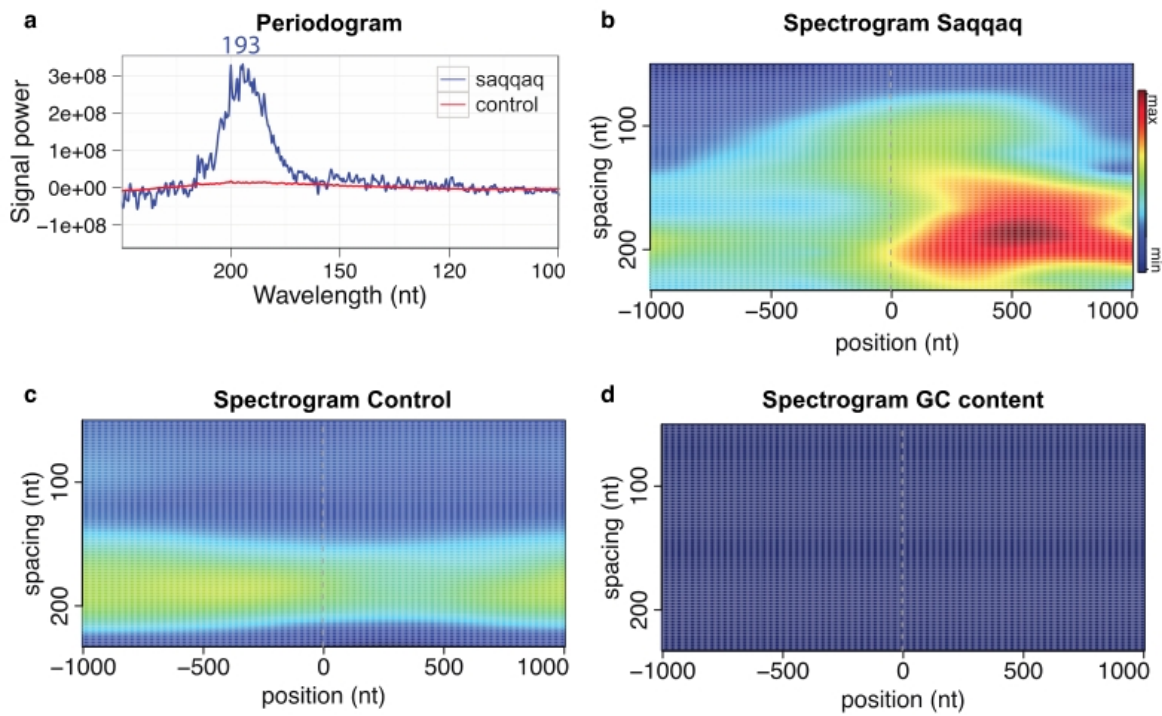

**Figure S2.3**

**Fourier Transform periodicity analyses of transcription start site regions.**

**a**, Read depth periodogram for Saqqaq and Control. Saqqaq peak periodicity is 193 bp. **b**, Spectrogram for GC-corrected Saqqaq read depth. The strongest periodicity signal exists downstream of the TSS. **c**, Spectrogram for Control. Note that some periodicity is found around 200bp in the region, though much weaker than for Saqqaq. **d**, GC content does show any datable periodicity in the range.

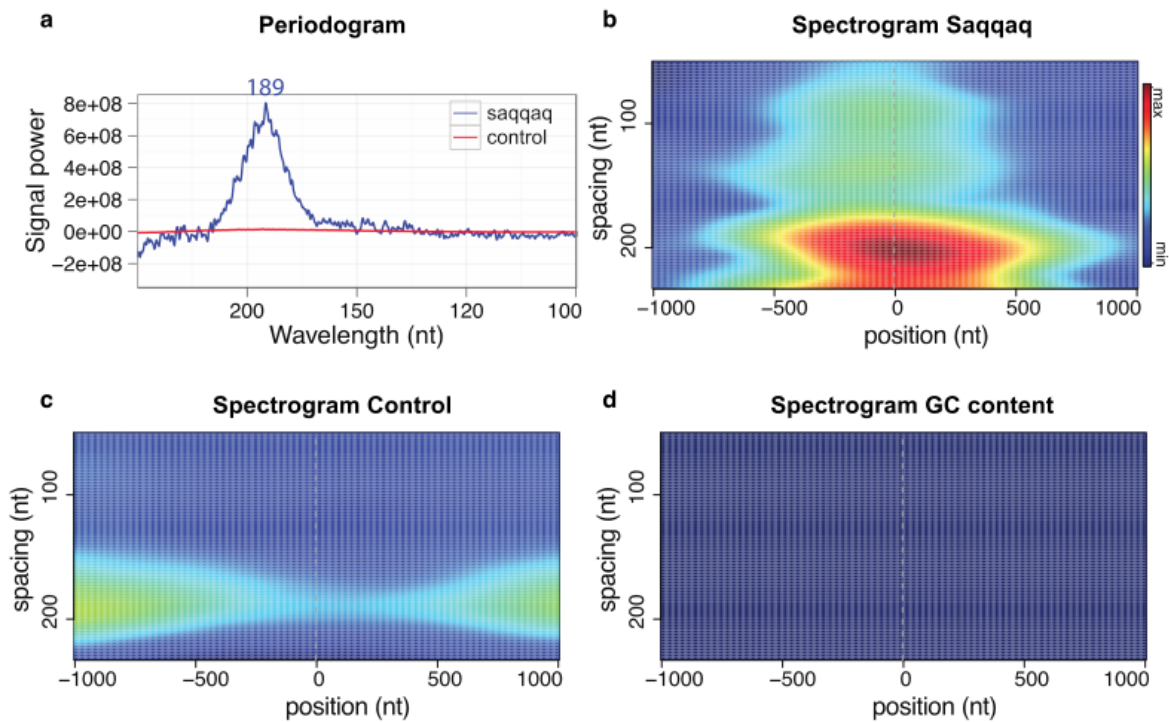

**Figure S2.4**

**Fourier Transform periodicity analyses of CpG islands.**

**a**, Read depth periodogram for Saqqaq and Control. Saqqaq peak periodicity is 189 bp. **b**, Spectrogram for GC-corrected Saqqaq read depth. **c**, Spectrogram for Control. Note that some periodicity is found around 200bp in the region, though much weaker than for Saqqaq. **d**, GC content does show any datable periodicity in the range.

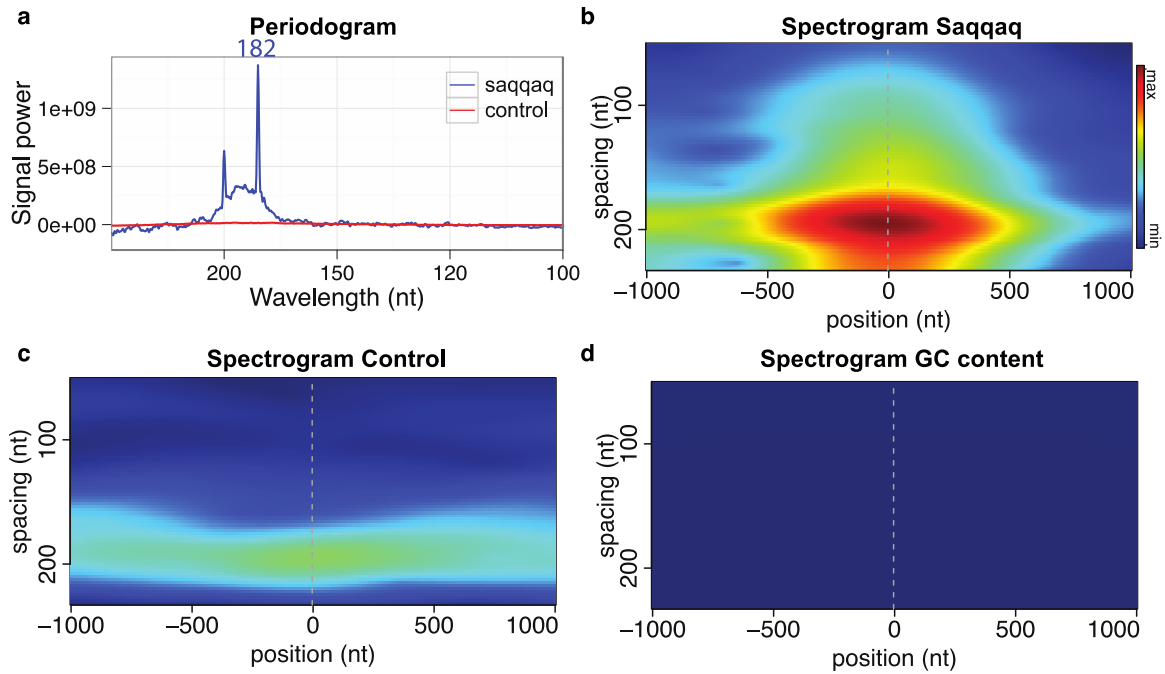

**Figure S2.5**

**Fourier Transform periodicity analyses of CTCF regions.**

**a**, Read depth periodogram for Saqqaq and Control. Saqqaq peak periodicity is 182 bp. **b**, Spectrogram for GC-corrected Saqqaq read depth. **c**, Spectrogram for Control. Note that some periodicity is found around 200bp in the region, though much weaker than for Saqqaq. **d**, GC content does show any datable periodicity in the range.



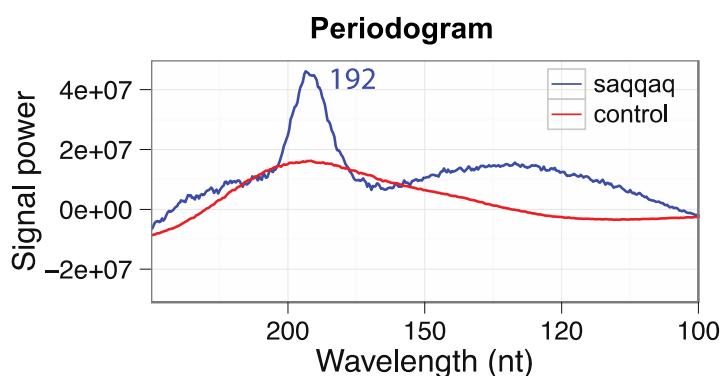

**Figure S2.6**

**Periodogram of gene bodies.**

Read depth periodogram for Saqqaq and Control. Saqqaq peak periodicity is 192 bp. Note that Control that exhibits some signal, albeit much weaker than Saqqaq.

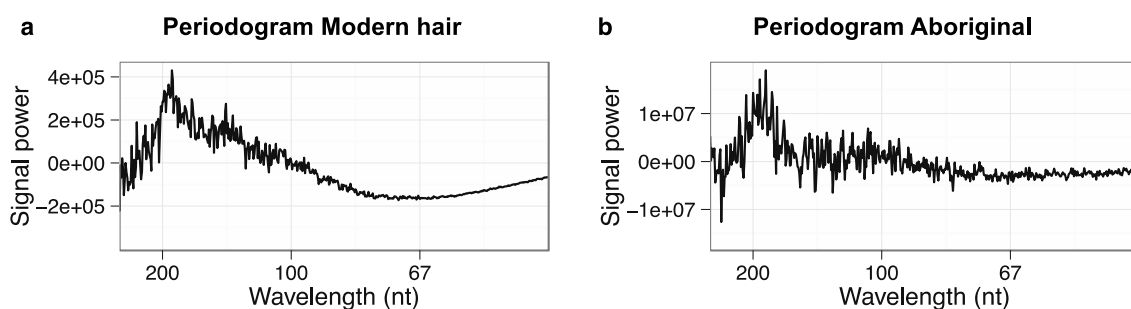

**Figure S2.7**

**Periodograms of CpG islands for Modern hair and Aboriginal data sets.**

**a**, Periodogram for Modern hair data set. Peak periodicity is at 186 bp. Note that modern hair was low-coverage and hence less signal was detected. **b**, Periodogram for Aboriginal data set. Peak periodicity is at 182 bp.

**2.6. Phasograms**

We predicted that in regions where nucleosomes are consistently positioned, the distance between two successive nucleosomes should equal the size of the nucleosome plus the size of the spacer region (~200 bp). Phasograms were produced in a similar manner as described in [Valouev et al. 2011] in order to test for the presence of such signal.

Using the raw uncorrected data, we counted the distance of pairs of 5' ends on the same strand including only positions with at least at least 5 reads. For both the short and long range plots we used gene bodies (+1Kbp to the termination site) of UCSC protein coding genes

The signal overall follows an exponential distribution due to the local variation in read depth. To estimate the period, we therefore fit an exponential background distribution (Figure S2.8a), which we subtract from the signal to better reveal the periodicity (Figure S2.8b). Finally we analyzed the autocorrelation of these regions identifying the dominant short range phasing to be 10 bp and the long range phasing to be 185 bp (Figure S2.8c).

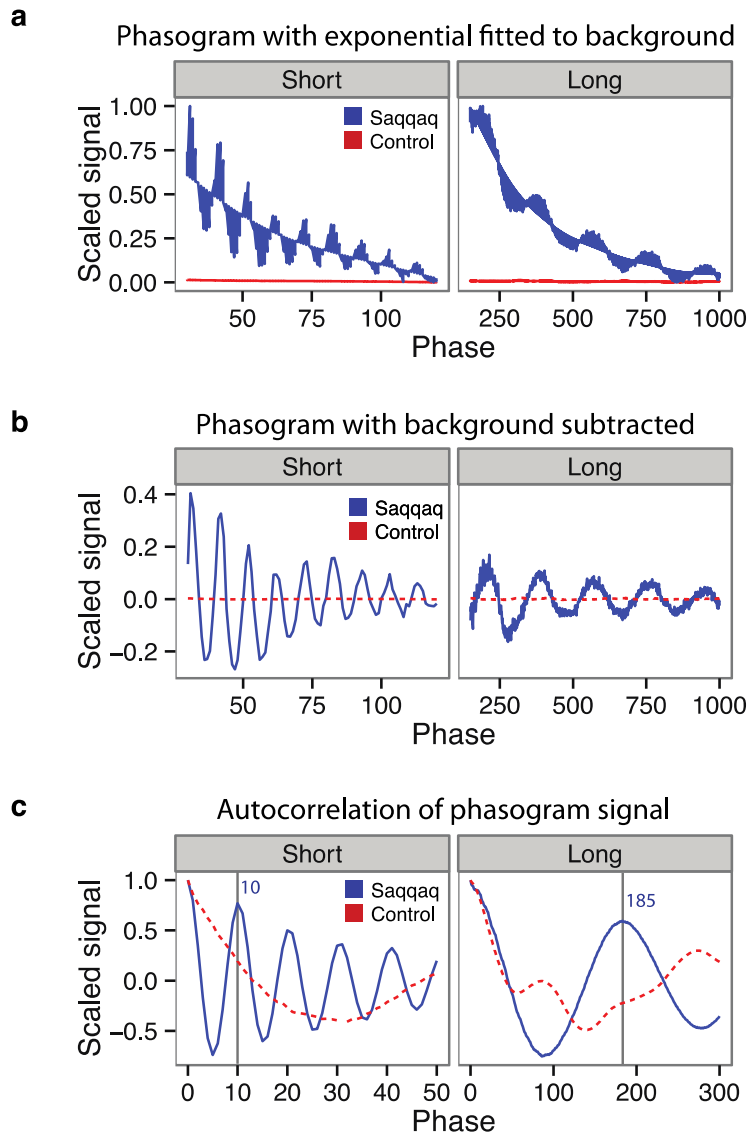

**Figure S2.8**

**Phasogram of Gene bodies.**

**a**, Raw signal of Saqqaq and Control. **b**, Background subtracted. **c**, Autocorrelation plot of phasogram signal with background removed. Peak periodicity is 10 bp for short range and 185 bp for long range (gray lines and blue numbers). Note that the autocorrelation for Control is based on a very weak signal.

## 2.7. Genome-wide map of nucleosomes

To generate a genome-wide map of nucleosome positions we applied a sliding window to the GC-corrected read depth and called the center position if it has the maximal read depth in that window (Figures 3.a, S2.9). We refer to these as peaks. The window size was chosen to be 147-bp based on the size of a single nucleosome. If the peak score is negative, which is possible when the expected read depth is greater than the observed read depth, the peak is discarded and no call is made. Though some (overcorrected) true calls are likely missed based on this, it avoids calls based simply on variation in the expected read depth.

Each call was assigned a score, defined as the read depth of the peak ( $p$ ) minus the average read depth of the left flanking region ( $lf$ ) and right flanking region ( $rf$ ):  $score = p - (lf + rf / 2)$  (Figures 3.a, S2.9). The score is constructed to capture aspects of both occupancy (peak height) and positioning (linker region depletion).

Importantly the expected read depth from our GC-correct procedure takes the place of a control experiment in the peak calling procedure. It is designed to capture and reflect any bias resulting from size and/or GC-content. Furthermore, the mappability of each read length is carefully taken into account and thus modeled in the final expected read depth (Section S2.2). The subtraction of the expected read depth thus corrects for peaks that would be wrongly called due to these effects, similar to the role of a control experiment in say ChIP-seq analysis. To further eliminate any risk mapping biases, the downstream analysis of the nucleosome calls are all restricted to the Unique regions (Section S2.2).

Nucleosome calls based on the original, uncorrected read depth were made using the same approach. However, instead of the difference score used for the GC corrected read depth, we used a log-odds score, which better captures the positioning signal of linker region depletion:  $score = \log(p / ((lf + rf) / 2 + eps))$ . Eps was chosen to be 1/25. The analyses of these calls gave similar results, as exemplified by their nucleotide and di-nucleotide distributions (Figure S2.13).

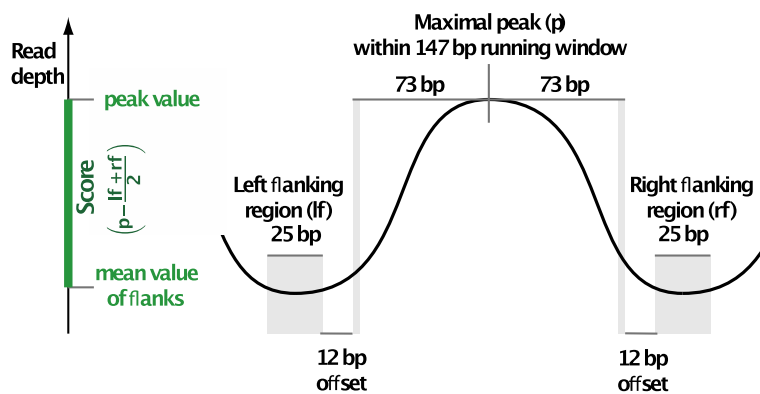

Figure S2.9

### Nucleosome calls and scores.

(Similar to Figure 3.a and included for convenience of reference.) Nucleosome center positions (dyads) are called as read depth peaks if maximal at center of running window of nucleosome length (147 bp). Calls are scored by the difference in read depth between the peak and the average read depth of the left and right flanking regions.

## 2.8. Estimating false positives

The Control data set has the same overall genomic read depth and read length distribution as the Saqqaq by construction. However, it shows only a weak nucleosome signal in the periodicity analysis (section SI 2.5). We therefore made nucleosome predictions (section SI 2.7) based on the Control data set, in the assumption they would all effectively be false positives (FP). We subsequently used those to define the expected number of false positive predictions at a given quality score cutoff.

For a given score cutoff, we thus estimate the expected number of true positive calls (TP) as the difference between the number of Saqqaq calls (S) and the number of Control calls (B):  $TP = S - FP = S - B$  (Figure 3.b, Figure S2.10).

The false discovery rate (FDR) for a given score cutoff was estimated using a similar procedure as the ratio between the number of Control calls and the number of Saqqaq calls:  $FDR = B / S$ .

To investigate if some extreme peaks in the Control could point to problematic regions and lead to spurious calls in the Saqqaq, we evaluated the correlation in ranks between the top-scoring Control peaks and the Saqqaq peaks (figure S2.10c). As can be seen, there is no tendency for the top-ranked Control peaks to be correlated with top-ranked Saqqaq peaks in the Unique regions used for all analysis.

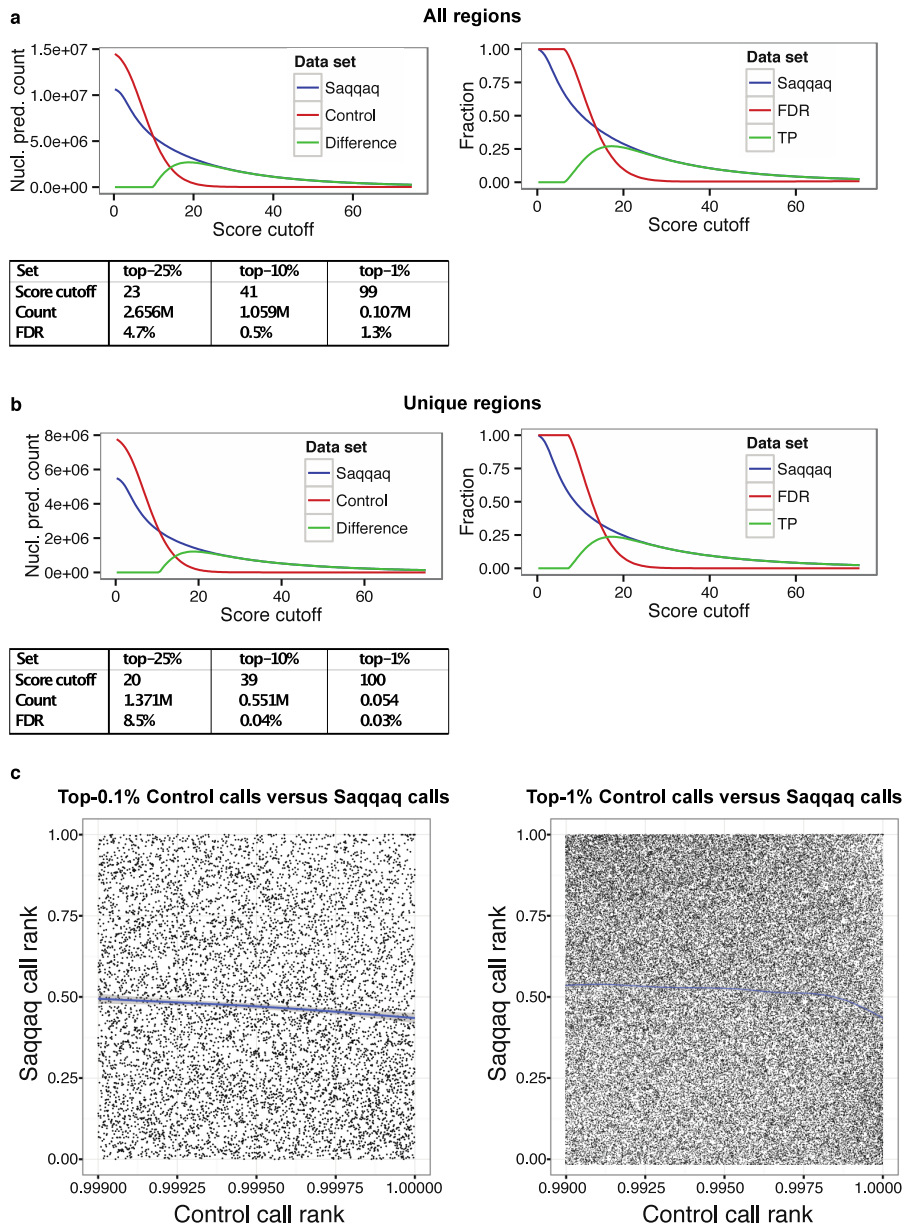

**Figure S2.10**

**Call score distributions and summary statistics.** **a**, Analyses of all calls. Top-left, difference between Saqqaq and Control calls is taken as an estimate of number true positive calls at given cutoff. Top-right, Saqqaq call distribution, false discovery rate (FDR), and fraction of true positive calls (TP) of the total set are given as a function of cutoff. Bottom, summary statistics for different top-scoring subsets (fractiles). **b**, Analyses of calls in Unique regions as in (a). **c**, The rank of the top 0.1% (left) and top 1% (right) peak calls in the null set plotted against their corresponding rank in the Saqqaq set. A smoothed line has been added for visualization of the general trend (stat\_smooth from ggplot2 in R). There is no bias for highly ranked null peaks to receive a high rank in the Saqqaq set.

## 2.9. Nucleotide and di-nucleotide distributions across nucleosomes

Based on the nucleosome calls (section SI 2.8), we evaluate the nucleotide and di-nucleotide distributions across the nucleosomes. For this, we ranked the calls based on the positioning scores and explored the sequence preference at different thresholds by summing the number of mono-nucleotides or di-nucleotides and dividing by the number of nucleosomes. This gave us an average profile for a given threshold (Figures 3.c, S2.10, S2.11).

The resulting profiles exhibit distinct nucleotide level shifts in nucleotide and di-nucleotide frequencies which indicates that the nucleosome sequences are accurately aligned and hence a large fraction of the nucleosome calls are at nucleotide precision. Furthermore, we note distinct nucleotide preferences at positions close to the center (dyad) and the presence of strand-specific patterns nucleotide (Figure S2.11) and di-nucleotide patterns (Figures 3.c). We hypothesize that these profiles reflect sequence-level positioning determinants and note that the strand-specific patterns that shifts across the dyad suggest a method for precise positioning despite overall weak sequence signal.

For comparison, we also include the nucleotide and pyrimidine/purine di-nucleotide distributions around nucleosome calls based on the uncorrected, original Saqqaq read depth data (Figure S2.13). These mirror the characteristics of the corresponding plots for the GC-corrected read depth (Figure S2.11 and Figure 3.c), showing that the nucleotide distribution results are robust. As expected, the top-scoring uncorrected calls show a stronger degree of GC enrichment among top-scoring calls (Figure S2.13), as these will be penalized by the GC correction scheme.

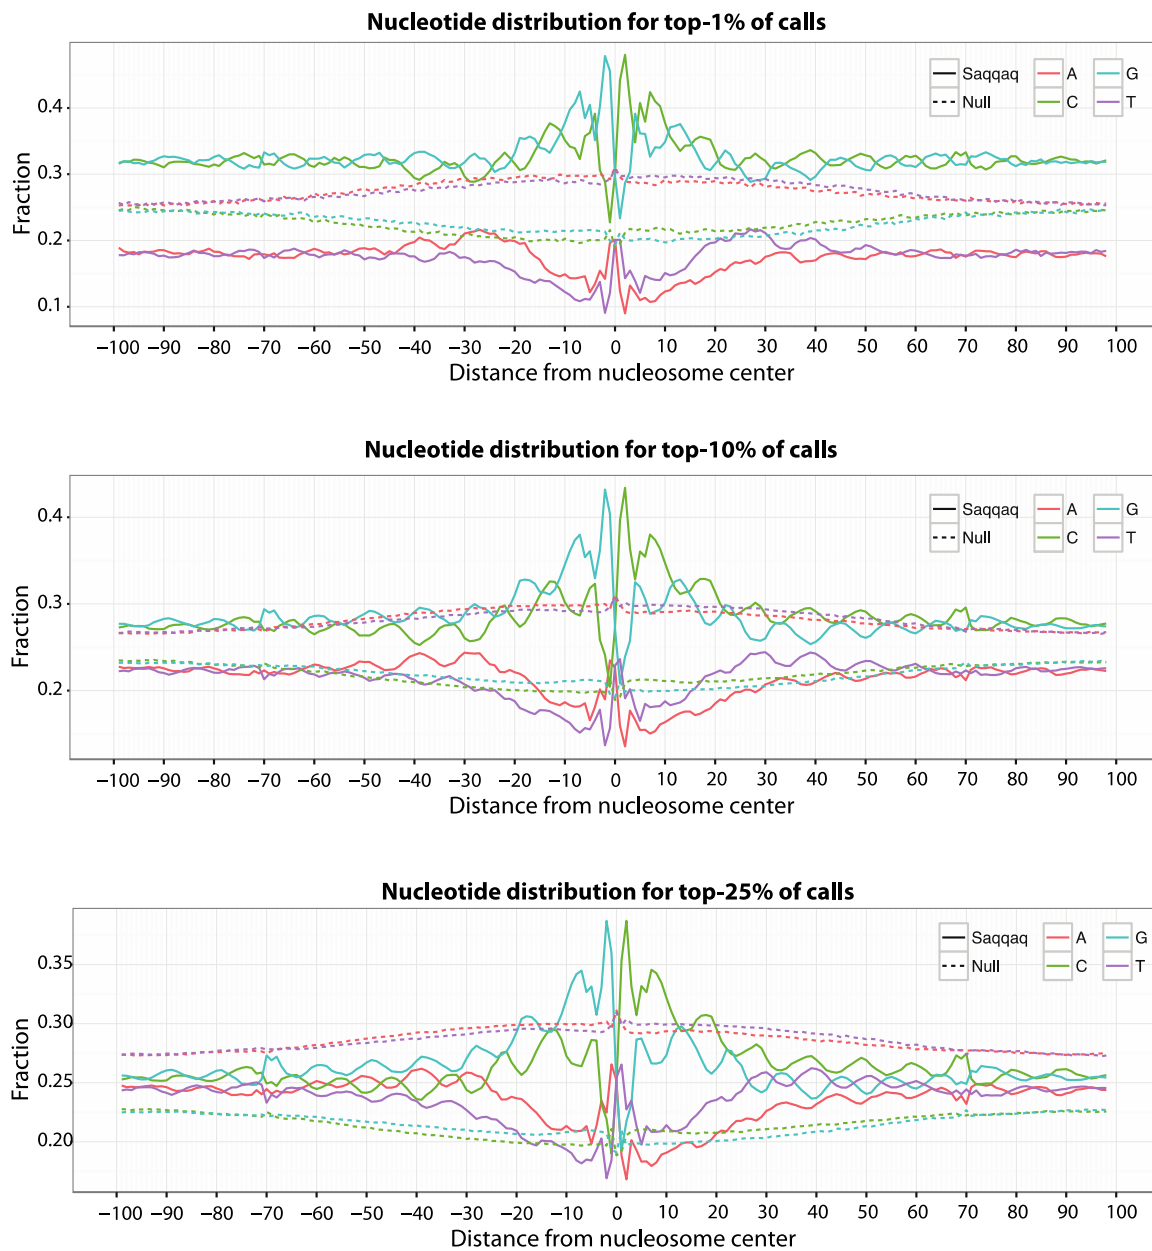

**Figure S2.11**

**Mono-nucleotide distributions across sets of top-scoring nucleosome calls for Saqqaq and Control.** The average usage of a mono-nucleotide for positions relative to the nucleosome peak call (dyad) for different top-scoring subsets of nucleosome calls from Unique regions (top: top-1%;middle: top-10%; bottom: top-25%).

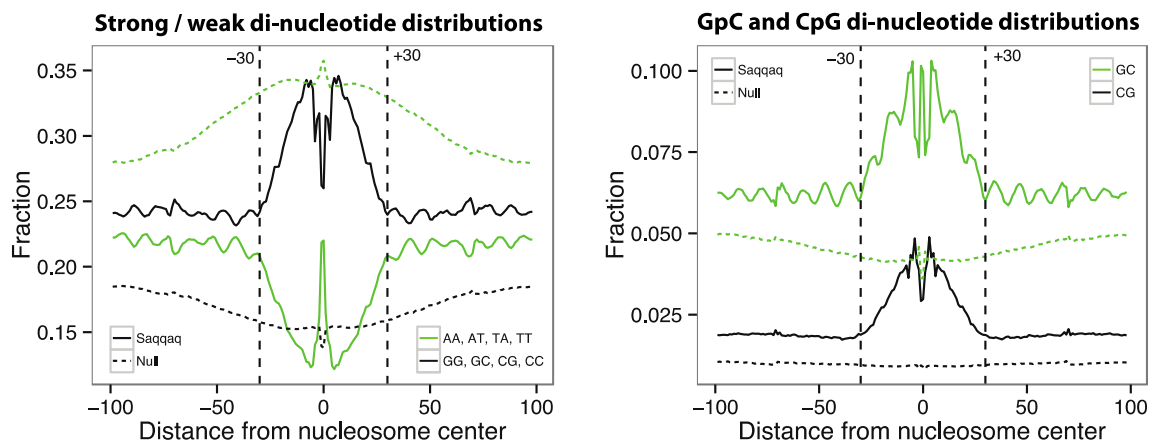

**Figure S2.12**

**Strong / weak and CpG / GpC di-nucleotide distributions across sets of top-25% nucleosome calls for Saqqaaq and Cotrol.** Left, strong (GG, CG, GC, CC) / weak (AA, AT, TA, TT) di-nucleotide profiles. Boundary of peak is denoted with vertical lines (at -30 and +30). Right, CpG and GpC di-nucleotide profiles. Boundary of peak denoted with vertical lines (at -30 and +30).



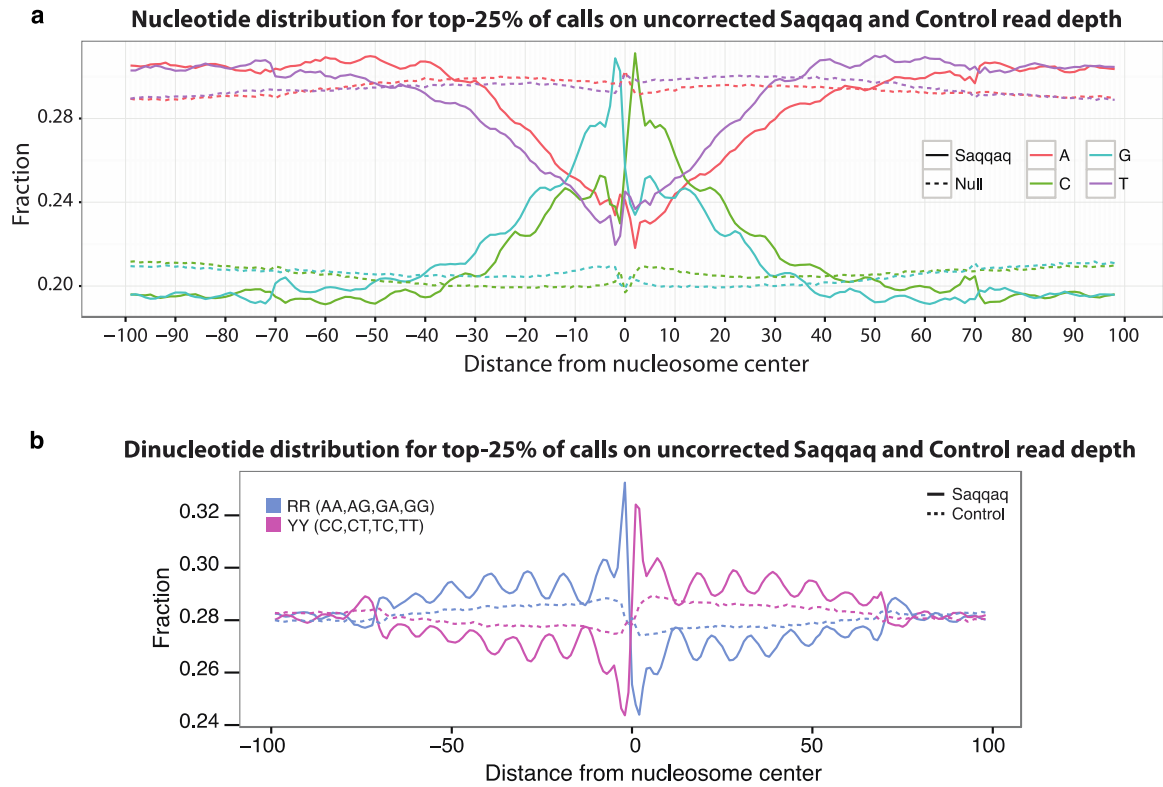

**Figure S2.13**

**Mono-nucleotide and pyrimidine/purine di-nucleotide distributions across top-25% scoring nucleosome calls for the original, uncorrected Saqqaq and original, uncorrected Control.**

**a**, The average usage of mono-nucleotides at positions relative to the nucleosome peak call (dyad) for top-25% scoring subset of nucleosome calls from Unique regions. **b**, The distribution of purine/pyrimidine di-nucleotide usage across top 25% called nucleosomes from Unique regions.

## Section SI3. Methylation footprint of the Saqqaq genome

### 3.1. Background

While *post-mortem* deamination of cytosine residues results in the formation of uracils, the deamination of methylated cytosines (5mC) results in thymine residues that are adequate templates for both Phusion and *Taq* platinum high-fidelity (Hifi) DNA polymerases (Figure S3.1). Consequently, DNA strands with methylated CpG dinucleotides will partake to the pool of library molecules that will generate sequence data regardless of which of the two DNA polymerases was used, should cytosine residues be deaminated or not (Figure S3.1). Conversely, DNA strands with unmethylated but deaminated CpG dinucleotides (ie. UpG) will provide sequence data following amplification with Hifi but not Phusion (Figure S3.1). In the next sections, we exploited this versatile behavior of 5mCpG and CpG dinucleotides as a direct experimental signature of ancient DNA methylation tracts.

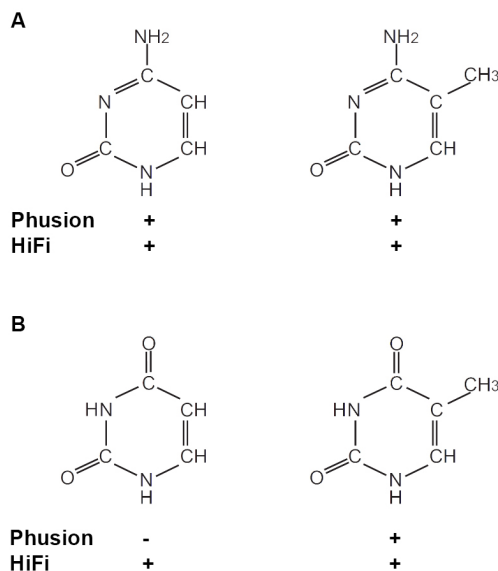

**Figure S3.1.**

**Unmethylated and methylated CpG dinucleotides show different sequencing features following *post-mortem* deamination.** **A**, Biochemical structure of native cytosine (left) and 5mC (right) residues. **B**, Biochemical structure of deaminated cytosine (ie. uracil, left) and deaminated 5mC (thymine, right) residues. The ability of Phusion and Hifi DNA polymerases to by-pass the different types of nucleotides during PCR amplification is indicated with plus/minus signs.

### 3.2. Nucleotide mis-incorporation patterns

Nucleotide mis-incorporation patterns were recovered from the mapDamage package [Ginolhac et al. 2011]. This package reports the frequencies of all mismatches observed between sequence reads and the genome used as a reference (here, hg18) for all nucleotidic positions along sequencing reads. Even though Phusion cannot by-pass deaminated cytosine residues, nucleotide mis-incorporation patterns clearly mimicked cytosine deamination, with C→T mis-incorporation rates increasing towards the 5'-end of the sequencing reads (Figure 4.a, bottom left), in agreement with previous reports [Briggs et al. 2007; Krause et al. 2010; Ginolhac et al. 2011; Orlando et al. 2011] and the presence of 5'-overhangs that favor cytosine deamination after death. We hypothesized that the signal originated from 5mC residues that were deaminated after death and were replicated

as thymine analogs, hence generating C→T mismatches post-sequencing when compared to the hg18 reference.

Encouragingly, this signal was absent from the promoter of the constitutively-expressed house-keeping gene GAPDH (Glyceraldehyde 3-phosphate dehydrogenase; uc001qor.1, chr12:6,513,918-6,517,797), in agreement with the documented absence of cytosine methylation on that region [Noer et al. 2006]. Conversely, the signal was present on Phusion reads respectively mapping the genomic regions corresponding to TSH2A (chr6:25,834,270-25,834,769; for a total of 484 reads) and TSH2B (chr6:25,835,116-25,835,552; for a total of 244 reads) (data not shown), two testis-specific genes that are known to be silent in somatic tissues and hypermethylated [Zalensky et al. 2002; Weber et al. 2007].

We further recorded mis-incorporation rates in different genomic regions (mitochondrial DNA; nuclear DNA; exons located outside CGIs; introns located outside CGIs; CGIs). These genomic regions were identified using the IRanges R library [Pages et al. 2010] and UCSC Genome Browser tracks. Since C→T mismatch rates decrease from 5' ends of ancient DNA templates due to the presence of 5'-overhangs [Briggs et al. 2007], CpN dinucleotides located at sequence starts are expected to show maximal level of cytosine deamination. Following our hypothesis, none of such Phusion reads would show C→T misincorporations at the first position unless it was methylated (UpG are not by-passed in contrast to TpG, the *post-mortem* by-product of 5mCpG deamination; Figure S3.1). Therefore at read starts, CpG→TpG conversion rates are expected to be significantly increased at CpG due to the methylation background, but not at CpA, CpT and CpC (70-80% of cytosine methylation occurs at CpG sites in the human genome; [Lister et al. 2009]). We tested this prediction by binning sequence reads generated with Hifi and Phusion according to which of those four types of dinucleotides was present in the reference genome at sequencing starts (Figures 4.a and 4.b).

For genomic regions starting with CpG dinucleotides, a higher fraction of Phusion reads were found to start with TpG dinucleotides, especially in exonic and intronic regions located outside CGI (Figure 4.b). Conversely, CGI exhibit reduced proportions of Phusion reads starting with TpG dinucleotides, in agreement with the fact that most, but not all, CGI represent hypomethylated genomic regions [Deaton and Bird 2011]. From all genomic regions considered, the mitochondrial genome appeared as an outlier showing the lowest levels in agreement with the global unmethylated level of this genome [Rebello et al. 2009]. Interestingly, the same trend in CpG→TpG conversion rates was observed but with reduced frequencies when considering sequencing reads that covered genomic CpG dinucleotides at positions 20 and 21 (Figure S3.2). Compared to sequencing starts, these positions are affected by lower cytosine deamination rates [Briggs et al. 2007], which results in lower *post-mortem* 5mCpG to TpG conversion rates, and consequently, lower CpG→TpG conversion rates. Importantly, CpA, CpC and CpT dinucleotides exhibit similar levels of TpA, TpC, and TpT conversions, respectively, regardless of the genomic region considered, suggesting that the observed patterns were indeed CpG-specific and therefore driven by the combination of methylation and deamination of cytosines.

All in all, we found that C→T mis-incorporations were preferentially located in genomic regions known to undergo methylation (CpG, resulting when methylated in tractable 5mCpG→TpG Phusion conversions); as expected (Figure S3.1), the strength of the signal detected appeared directly dependent of *post-mortem* deamination levels (see conversion rates at positions 1-2 and 20-21), suggesting that methylation could only be detected following *post-mortem* deamination of 5mC

residues. This confirmed our hypothesis and suggested that Phusion reads could provide a genuine a signature of methylation patterns in ancient genomes.

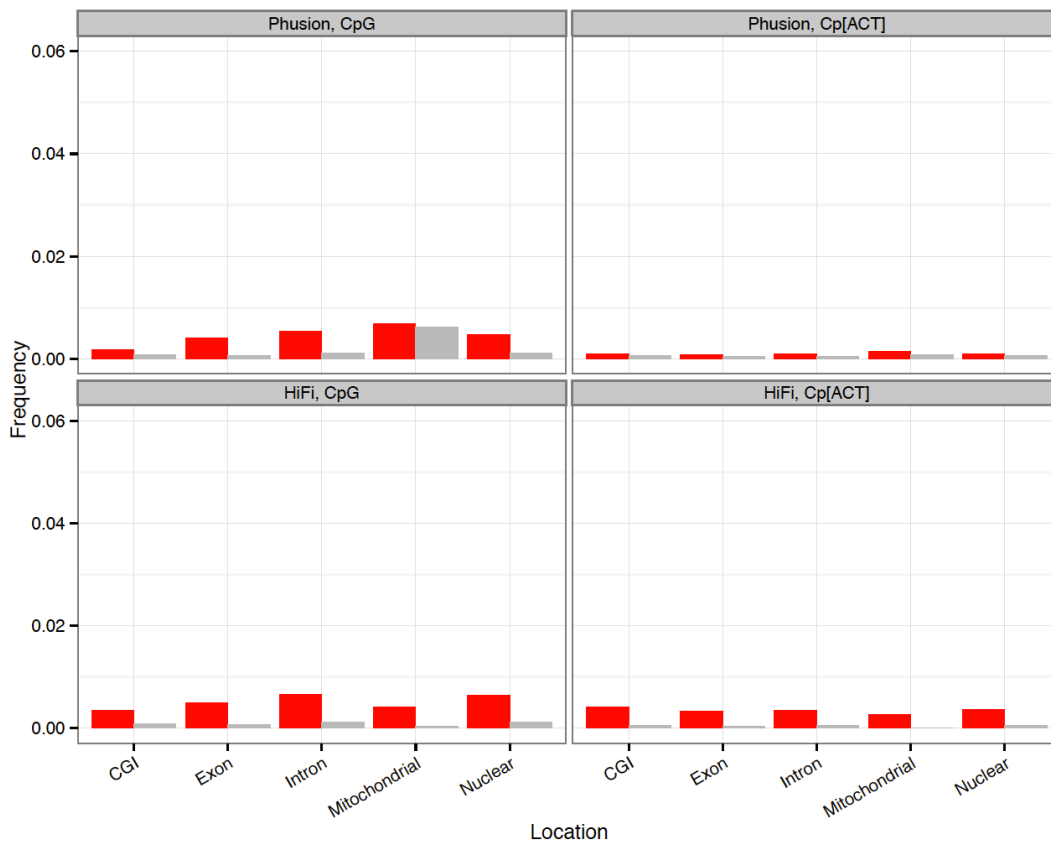

**Figure S3.2.**

**Substitution patterns at CpN dinucleotides.** We calculated the proportion of alignments showing a CpN dinucleotide in the reference genome and TpN at positions 20-21 within sequencing reads. Such CpG→TpG conversions at positions 20-21 are reported in red and have been calculated for different genomic regions, including: mitochondrial DNA (Mitochondrial); the whole nuclear genome (Nuclear); exons outside of CGI (Exon); introns outside of CGI (Intron); and CGI. Additionally, the rates of other types of dinucleotide conversions were investigated (Other: CpA→TpA, CpT→TpT, CpC→TpC) and are reported in grey. Top: Phusion reads. Bottom: HiFi reads. Figure 4.b provides similar calculations at read starts (ie. positions 1-2).

Overall, relatively high CpG→TpG conversion rates (over ca. 3%) were observed with HiFi in all genomic regions, including the mitochondrial genome (Figure 4.b). This appears in striking contrast with what observed on Phusion reads and confirms the ability of HiFi polymerase to by-pass uracil residues, regardless of their methylation status (Figure S3.1). Of note, that higher CpG→TpG conversion rates were observed with HiFi in Introns and Exons than in CGIs and in the mitochondrial genome suggests preferential elongation for that enzyme at deaminated 5mC (ie. analog of native thymines) than at deaminated cytosines (ie. uracils).

In this study, we identified a simple means of recovering information about the

methylation status of CpG dinucleotides in ancient genomes by looking at CpG→TpG conversions events at starting positions of Phusion reads. At these positions, *post-mortem* cytosine deamination rates are maximal, and methylation preserves our ability to PCR amplify and sequence damaged endogenous ancient templates. Note that the same holds true at sequence ends where complementary G→A misincorporations will be observed [Briggs et al. 2007], resulting in CpG→CpA conversion events. However, as the Saqqaq sequence data mostly corresponded to Single End reads, the large fraction of DNA inserts were not sequenced over their full length. In addition, a significant drop in base qualities was observed towards read ends. We therefore decided to disregard CpG→CpA conversion events at read ends (those result from the deamination of 5mCpG on the complementary strand), despite the information those carry about methylation. We anticipate that this information could be fully used in case where extensive Paired-End sequence data is available.

### 3.3. Quantifying ancient regional methylation levels

We used CpG→TpG at read starts in order to define  $M_s$ , a proxy for regional methylation levels (Figure S3.3). Specifically,  $M_s$  is defined as the total counts of CpG→TpG conversions at read starts normalized by the number of CpG dinucleotides present within a given genomic region of the reference human genome hg18. We disregarded conversions that possibly colocalized with positions described as polymorphic in dbSNP130 in order to filter for SNP hotspots, which provide a possible source of methylation-unrelated CpG→TpG conversions. Of note, even if CpG→TpG conversions represent a footprint of CpG methylation at a given location of the human genome, such conversions could only be detected in situations where the 5mC residue is affected by *post-mortem* deamination (see sections S13.1 and S13.2). For the Saqqaq data, this occurs only in ca. 4% of the cases (Figure 4.a), representing on average one chance event every 25 observations. This means that in 96% of the cases a given 5mCpG will not be deaminated and will therefore be read as a regular CpG, leaving no CpG→TpG conversion mark. Therefore, the absence of CpG→TpG conversions at a given CpG cannot be used to demonstrate the absence of methylation, unless this position shows an extremely high depth-of-coverage. Our methodology will consequently be most generally inappropriate for reconstructing genome-wide methylation maps at single nucleotide levels. However, by summing over particular genomic regions instead of unique CpGs (eg. promoters, gene bodies, exons and introns; see below), we could increase the chances to observe CpG→TpG conversions and predict regional methylation levels. Since CpG methylation levels have been shown to be significantly correlated within 1,000-2,000 bp [Eckart et al. 2006; Down et al. 2008], our method provides a means to scan genomes for differences in regional methylation levels, despite its relative lack of sensitivity at the single nucleotide level.

We first validated  $M_s$  as a methylation proxy by looking at known methylation patterns in specific genomic regions: gene promoters and exon-intron boundaries. As promoter methylation levels have been reported to be negatively correlated with their CpG density, we first binned promoters into three groups according to CpG density following [Ball et al. 2009]. A promoter region (PM) was defined following [Ball et al. 2009] as spanning 500 nucleotides upstream and 2,000 nucleotides downstream of the Transcription Start Site (TSS). High CpG promoters were defined to contain a 500-bp interval with a GC content of at least 0.55 and a CpG observed/expected ratio of at least 0.75. Low CpG promoters were defined as containing no 500-bp interval with a CpG observed/expected ratio of at least 0.48; all remaining promoters were defined as intermediate CpG promoters. Of the 51,939 genes analyzed, 16,186 (31.2%) were found to have high CpG promoters, 11,830 (22.7%) had low CpG

density promoters, and the remaining 23,923 (46.1%) had intermediate CpG promoters (Figure 4.c). For each category we calculated the distribution of  $M_s$  values. Given the relatively low *post-mortem* deamination rates observed in the Saqqaq genome (leading to ~4% C→T mismatch rates at sequencing starts; Figure 4.a), we required each promoter to have a minimum of 50 CpG dinucleotides in the reference in order to increase the likelihood of detecting deamination-driven 5mCpG→TpG conversions. In addition, we required a minimal number of 2 C→T mismatches per promoter in order to limit the impact of sequencing error in our estimates. In total, we considered a final number of 2,444, 5,973 and 10,026 promoters in the three classes of promoters (low, intermediate and high CpG, respectively).

We found that on average, genes having promoters with high CpG densities exhibited lower  $M_s$  values than genes having promoters with intermediate CpG densities (median  $R_s$  values for the global gene dataset: 1.35% *versus* 2.06%; Figure 4.c). Similarly, genes having promoters with intermediate CpG densities showed lower  $M_s$  values than promoters from the low CpG class (median  $M_s$  values of 2.06% *versus* 5.46%). Overall, this supported the expected inverse relationship between CpG density and promoter methylation levels as reported in Ball et al. [2009] and therefore confirmed  $M_s$  as a good proxy for gene methylation at the regional level.

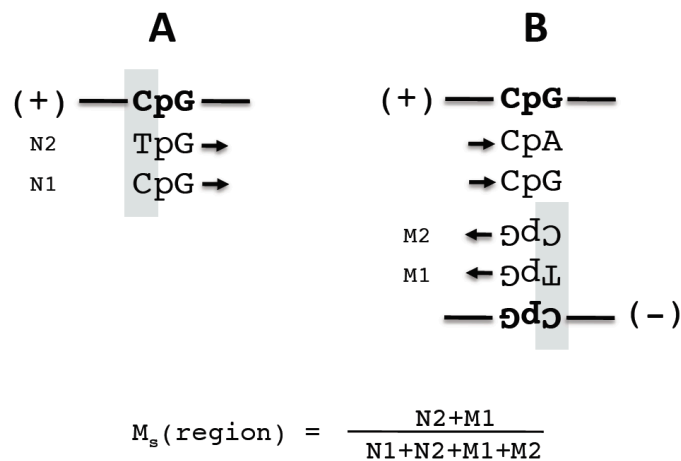

**Figure S3.3**

**Defining  $M_s$ , a proxy for methylation levels of a given genomic region.**

As cytosines at sequencing starts show maximal but still moderate deamination levels in the Saqqaq sequence dataset (Figure 4.a, bottom left), we decided to focus only on the first position of sequencing reads, outlined in grey, and ignore possible CpG→TpG conversions located further down in the sequence. The direction of sequencing reads is indicated with arrows. For Phusion reads mapping the human reference hg18 on the (+) strand and at a location starting with a CpG dinucleotide, we first counted N1 and N2 as the number of reads starting with CpG and TpG, respectively (panel A). The latter results from *post-mortem* deamination of 5mC. We next focused on reads mapping the (-) strand and counted the number of Phusion reads starting with CpG and TpG. These were flagged as ending with CpG and CpA when reverse completed and aligned to the (+) strand (panel B). The  $M_s$  statistics of a given region consists of the ratio of methylation-derived mis-incorporation signatures by the total number of reads starting/ending at a CpG location in hg18. Note that this measure could be extended to other sequence positions in cases ancient DNA templates show higher deamination rates than what observed on the Saqqaq individual (and to sequencing ends if full length sequence information is available).

We next performed similar analyses at splice sites boundaries, in an attempt to recapitulate the known enrichment in methylated Cytosines at the splice site boundary and the overall decrease in methylation rates from exons to introns [Laurent et al. 2010]. Exon coordinates of all genes from the hg18 reference genome were retrieved from UCSC Genome browser database [Meyer et al 2012] resulting in 95,746 splice sites. We calculated  $M_s$  for each position within 100 bp of each splice site. Final  $M_s$  profiles were plotted as a function of their position relative to the distance to the splice site boundary using a smoothing procedure based on 10bp long sliding windows (Figure S2.2).  $M_s$  successfully recovered the expected decline from relatively higher methylation levels in exons *versus* introns, as well as a sharp local increase in methylation at the splice site. This further confirmed  $M_s$  as a good proxy for monitoring methylation levels.

We further focused on CGIs, which function as promoters for about 60% of all human genes. Recently, Ginno et al. [2012] reported that CGI promoters showing significant strand asymmetry in the distribution of guanines and cytosines (GC skew) immediately downstream of their transcription start (TSS) are methylation-resistant. This feature capacitates the formation and the thermodynamic stability of R loops during transcription (with G-rich RNA strands reannealing to template C-rich DNA strands, forcing G-rich DNA strands into a single strand conformation) and is highly predictive of the unmethylated state of CGIs. Consequently, at CGI promoters showing high GC skew, methylation is expected to show minimal levels at TSS and to gradually increase upstream and downstream the TSS before reaching average levels ca. 1,000-2,000 bp away [Ginno et al. 2012]. This pattern is virtually absent at CGI promoters showing no strand asymmetry in the distribution of guanines and cytosines immediately downstream from their TSS. We therefore retrieved all 7,820 genomic coordinates covered by GC skew CGI promoters as defined from Ginno et al. [2012] and binned each position relative to the distance to the TSS. We then calculated  $M_s$  levels at each of those positions summing across all GC skew promoters. Final  $M_s$  profiles were plotted using a smoothing procedure based on 10bp long sliding windows (Figure S3.4). GC skew CGI promoters were found to show the expected methylation profile, with minimal methylation at TSS followed by a gradual increase upstream and downstream the TSS, suggesting that  $M_s$  provides a good measure of ancient cytosine methylation levels.

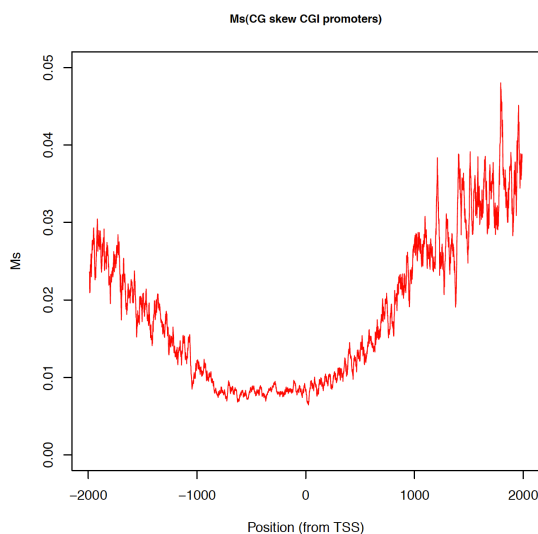

**Figure S3.4**

**$M_s$  methylation profiles at GC skew CGI promoters.**

GC skew CGI promoters show significant strand asymmetry in the distribution of guanines and cytosines immediately downstream from their TSS [Ginno et al. 2012]. We calculated  $M_s$  values across GC skew CGIs at each position located within 2,000 bp upstream and downstream of the TSS. The final plot was generated following a smoothing procedure. A characterization of the promoters showing a pattern similar to GC skew CGI promoters is provided in Supplemental Section SI3.5 and Table S3.5.

We next followed the procedure described in Straussman et al. [2009] to predict CGIs that are protected from *de novo* methylation and that thus remain constitutively under-methylated throughout development. At such regions,  $M_s$  is expected to show lower values than at methylation-rich CGIs. The latter were defined using the data presented in Straussman et al. [2009] as CGIs showing methylation in every cell type tested. Although no specific data were available for hair shafts and hair follicles in this study, the methylation levels were monitored across a wide range of tissues as diverse as brain, liver, bone, colon, sperm and blood and CGIs showing methylation in every cell type tested were recorded. Similar levels of methylation at those CGIs are likely to be found in hairs. Predicted constitutively under-methylated CGIs represented a total number of 13,372 genomic regions while methylation-rich CGIs represented 2,583. As expected, we found a ca. 7.4-fold reduction in methylation levels for predicted under-methylated CGIs as compared to ubiquitously methylated CGIs (Figure S3.5). This again validated  $M_s$  as a good proxy for regional methylation levels.

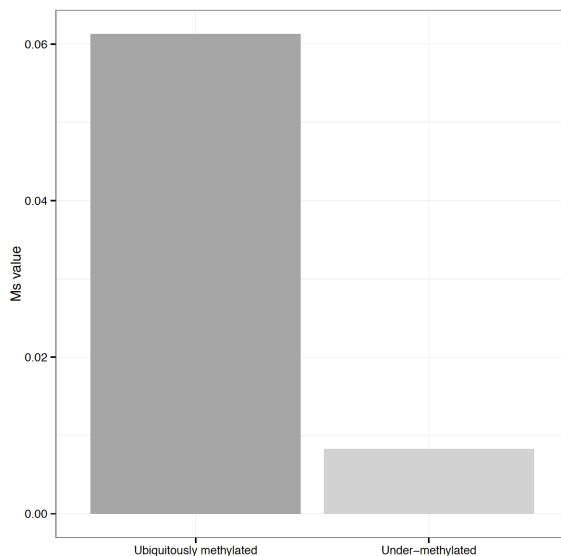

**Figure S3.5**

**$M_s$  methylation levels at predicted under-methylated and ubiquitously methylated CGIs.**

CGIs were binned in two main classes following Straussman et al. [2009]. The first corresponds to a class of CGIs that remain significantly under-methylated during development while the second corresponds to CGIs showing significant methylation levels across a full range of somatic tissues.

Finally, we focused on two specific genes for which methylation levels have been quantified in a range of hairs sampled from human individuals at different stages of their life (from birth to >80 years). The first gene, SOX10, has been shown to reach high methylation levels within its promoter region (chr22:36,710,485-36,711,485) following two years of age [Kim et al. 2006]. Similarly, the second gene, CSX, follows similar and synchronous age-dependent methylation changes, however reaching lower methylation levels than SOX10 at its 3'-untranslated region [Kim et al. 2006]. We therefore used  $M_s$  to calculate methylation levels within both regions. For CSX, coverage was limited, precluding restricting  $M_s$  calculation to the sole 3'-UTR.  $M_s$  was therefore calculated for a larger region (chr5:172,591,951-172,592,951) where we found evidence for methylation in both genes. We estimated ca. 18-fold greater methylation levels at SOX10 than CSX. This suggests that besides large-scale trends at different classes of genomic regions,  $M_s$  can also capture hair-specific methylation information at specific genes.



### 3.4. Methylation-based unsupervised hierarchical clustering

Convinced that  $M_s$  could capture genuine information regarding ancient regional methylation levels of the human genome, we next compared the methylation levels as estimated from the Saqqaq data to known methylation levels of different human tissues, including hairs, blood, buccal, fat, liver, muscle, omentum, pancreas and saliva [Slieker et al. 2013]. For hair, blood, buccal and saliva, those methylation levels were surveyed in five human donors (PT1, PT2, PT3, PT4 and PT5) ranging in age from 22 to 40 years. For blood, fat, liver, muscle, omentum and pancreas, we restricted our comparisons to the only two individuals from the original study surveyed for all tissues (IT13 and IT15 of age 64 and 65, respectively). This comparative dataset corresponded to normalized methylation levels at 450k CpG sites as available from the Illumina 450k array [Dedeurwaerder et al. 2011; Roessler et al. 2012]. Taking advantage of the known correlation between CpG sites located within 1,000bp-2,000 bp [Eckart et al. 2006; Down et al. 2008], we first calculated  $M_s$  for 2,000 bp-wide regions centered at each CpG. Of note, at least 50% (95%) of such regions include 124 (24) CpGs a large proportion of CpGs and are therefore suitable for  $M_s$  calculations.

Hereafter (Supplemental Sections S13.4-S13.7, S14), we will refer to coverage as the total number of counts for reads starting at a CpG location within a given genomic region ( $N1+N2+M1+M2$ ; see Figure S3.3). This represents the total number of reads observed within a given region that enabled us to calculate a regional  $M_s$  value for each CpG represented on the Illumina 450k array. We excluded CpG sites located on sexual chromosomes in order to avoid possible bias related to chromosomal X inactivation in females (individuals PT1, PT2 and PT3) and/or coverage differences (the Saqqaq individual was a male). We then filtered CpG regions for a range of minimal coverage (every 50, from 100 to 500) and tested for a possible correlation between  $M_s$  and methylation levels observed in each tissue and each individual described above. Linear models were built using the `lm()` function in R [R Development Core Team 2012] and adjusted-R squared values were calculated for three different models. In the first model,  $M_s$  and methylation levels known for a given individual and a given tissue were the two measurements considered ( $y \sim x$ ). In the second model, we also introduced the coverage observed as an extra measurement, as the genomic regions considered show different ranges of CpG densities; this measurement was considered as independent from  $M_s$  ( $y \sim x+z$ ). Finally, in the third model, this measurement was allowed to covary with  $M_s$  ( $y \sim x*z$ ). Tables S3.1 and S3.2 report the models that received higher support in each of the tests performed together with respective adjusted-R squared values. Of note, we found high adjusted R-squared values across all tissues and individuals investigated (0.440-0.785), supporting significant correlation levels between known biological methylation data and the Saqqaq  $M_s$  levels. Importantly, the Saqqaq data showed a higher fit with models built with the methylation data originating from hair tissues (adjusted-R squared = 0.618-0.785 *versus* 0.440-0.778 for non-hair tissues; Tables S3.1-S3.2), in agreement with the nature of the sample used for reconstructing the Saqqaq genome [Rasmussen et al. 2010].

| Individual | Coverage | Model | Blood | Model | Buccal | Model | Saliva | Model        | Hair         | Number |
|------------|----------|-------|-------|-------|--------|-------|--------|--------------|--------------|--------|
| PT5        | 500      | y~x*z | 0.707 | y~x*z | 0.770  | y~x*z | 0.738  | y~x*z        | <b>0.778</b> | 937    |
|            | 450      | y~x+z | 0.656 | y~x+z | 0.730  | y~x*z | 0.706  | y~x+z        | <b>0.743</b> | 2139   |
|            | 400      | y~x+z | 0.623 | y~x+z | 0.694  | y~x+z | 0.664  | y~x+z        | <b>0.707</b> | 4827   |
|            | 350      | y~x+z | 0.603 | y~x+z | 0.666  | y~x+z | 0.637  | y~x+z        | <b>0.675</b> | 10421  |
|            | 300      | y~x*z | 0.577 | y~x*z | 0.636  | y~x*z | 0.606  | y~x*z        | <b>0.659</b> | 20830  |
|            | 250      | y~x*z | 0.555 | y~x*z | 0.618  | y~x*z | 0.588  | y~x+z        | <b>0.644</b> | 390007 |
|            | 200      | y~x*z | 0.558 | y~x*z | 0.613  | y~x*z | 0.588  | y~x*z        | <b>0.625</b> | 68873  |
|            | 150      | y~x*z | 0.577 | y~x*z | 0.623  | y~x*z | 0.601  | y~x*z        | <b>0.635</b> | 114561 |
| 100        | y~x*z    | 0.573 | y~x*z | 0.613 | y~x*z  | 0.593 | y~x*z  | <b>0.621</b> | 182064       |        |
| PT4        | 500      | y~x*z | 0.717 | y~x*z | 0.768  | y~x*z | 0.734  | y~x*z        | <b>0.775</b> | 937    |
|            | 450      | y~x+z | 0.677 | y~x+z | 0.715  | y~x+z | 0.696  | y~x+z        | <b>0.750</b> | 2139   |
|            | 400      | y~x+z | 0.640 | y~x+z | 0.681  | y~x*z | 0.656  | y~x+z        | <b>0.710</b> | 4827   |
|            | 350      | y~x+z | 0.621 | y~x+z | 0.658  | y~x*z | 0.628  | y~x+z        | <b>0.694</b> | 10421  |
|            | 300      | y~x*z | 0.592 | y~x*z | 0.634  | y~x*z | 0.601  | y~x*z        | <b>0.672</b> | 20830  |
|            | 250      | y~x*z | 0.577 | y~x*z | 0.621  | y~x*z | 0.581  | y~x+z        | <b>0.654</b> | 390007 |
|            | 200      | y~x+z | 0.573 | y~x*z | 0.613  | y~x+z | 0.584  | y~x*z        | <b>0.633</b> | 68873  |
|            | 150      | y~x*z | 0.590 | y~x*z | 0.622  | y~x*z | 0.596  | y~x+z        | <b>0.638</b> | 114561 |
| 100        | y~x*z    | 0.582 | y~x*z | 0.611 | y~x*z  | 0.591 | y~x*z  | <b>0.627</b> | 182064       |        |
| PT3        | 500      | y~x*z | 0.698 | y~x*z | 0.762  | y~x*z | 0.739  | y~x+z        | <b>0.785</b> | 937    |
|            | 450      | y~x+z | 0.648 | y~x+z | 0.715  | y~x+z | 0.702  | y~x+z        | <b>0.752</b> | 2139   |
|            | 400      | y~x*z | 0.613 | y~x+z | 0.681  | y~x+z | 0.662  | y~x+z        | <b>0.709</b> | 4827   |
|            | 350      | y~x+z | 0.594 | y~x+z | 0.658  | y~x+z | 0.638  | y~x+z        | <b>0.692</b> | 10421  |
|            | 300      | y~x*z | 0.569 | y~x*z | 0.630  | y~x*z | 0.612  | y~x+z        | <b>0.669</b> | 20830  |
|            | 250      | y~x*z | 0.555 | y~x*z | 0.615  | y~x*z | 0.580  | y~x+z        | <b>0.644</b> | 390007 |
|            | 200      | y~x+z | 0.558 | y~x+z | 0.612  | y~x+z | 0.587  | y~x+z        | <b>0.635</b> | 68873  |
|            | 150      | y~x*z | 0.575 | y~x*z | 0.619  | y~x*z | 0.606  | y~x+z        | <b>0.641</b> | 114561 |
| 100        | y~x*z    | 0.570 | y~x*z | 0.610 | y~x*z  | 0.598 | y~x+z  | <b>0.624</b> | 182064       |        |
| PT2        | 500      | y~x*z | 0.691 | y~x*z | 0.778  | y~x*z | 0.755  | y~x+z        | <b>0.776</b> | 937    |
|            | 450      | y~x+z | 0.639 | y~x+z | 0.720  | y~x+z | 0.715  | y~x+z        | <b>0.747</b> | 2139   |
|            | 400      | y~x+z | 0.607 | y~x+z | 0.683  | y~x+z | 0.675  | y~x+z        | <b>0.706</b> | 4827   |
|            | 350      | y~x+z | 0.591 | y~x*z | 0.635  | y~x*z | 0.618  | y~x+z        | <b>0.688</b> | 10421  |
|            | 300      | y~x*z | 0.569 | y~x*z | 0.625  | y~x*z | 0.606  | y~x+z        | <b>0.665</b> | 20830  |
|            | 250      | y~x+z | 0.555 | y~x*z | 0.606  | y~x*z | 0.601  | y~x+z        | <b>0.643</b> | 390007 |
|            | 200      | y~x+z | 0.554 | y~x*z | 0.609  | y~x*z | 0.601  | y~x+z        | <b>0.633</b> | 68873  |
|            | 150      | y~x*z | 0.573 | y~x*z | 0.624  | y~x*z | 0.613  | y~x+z        | <b>0.638</b> | 114561 |
| 100        | y~x*z    | 0.569 | y~x*z | 0.613 | y~x*z  | 0.603 | y~x+z  | <b>0.622</b> | 182064       |        |
| PT1        | 500      | y~x*z | 0.705 | y~x*z | 0.769  | y~x*z | 0.718  | y~x+z        | <b>0.782</b> | 937    |
|            | 450      | y~x+z | 0.650 | y~x+z | 0.703  | y~x+z | 0.687  | y~x+z        | <b>0.741</b> | 2139   |
|            | 400      | y~x+z | 0.617 | y~x+z | 0.670  | y~x+z | 0.655  | y~x+z        | <b>0.703</b> | 4827   |
|            | 350      | y~x+z | 0.600 | y~x*z | 0.646  | y~x   | 0.542  | y~x+z        | <b>0.686</b> | 10421  |
|            | 300      | y~x*z | 0.575 | y~x*z | 0.626  | y~x*z | 0.568  | y~x+z        | <b>0.661</b> | 20830  |
|            | 250      | y~x*z | 0.562 | y~x*z | 0.612  | y~x*z | 0.537  | y~x+z        | <b>0.632</b> | 390007 |
|            | 200      | y~x+z | 0.560 | y~x*z | 0.607  | y~x+z | 0.560  | y~x+z        | <b>0.618</b> | 68873  |
|            | 150      | y~x*z | 0.577 | y~x*z | 0.620  | y~x*z | 0.553  | y~x+z        | <b>0.632</b> | 114561 |
| 100        | y~x*z    | 0.572 | y~x*z | 0.607 | y~x*z  | 0.548 | y~x+z  | <b>0.622</b> | 182064       |        |

**Table S3.1**

**Saqqaq M<sub>s</sub> methylation levels show stronger correlation with modern hair methylation levels than blood, buccal and saliva tissues.**

We considered the normalized methylation data available from [Slieker et al. 2013] for individuals PT1, PT2, PT3, PT4 and PT5. Parameters x, y, and z are described as follows: y = observed methylation levels in a given tissue for a given modern human individual; x = Saqqaq M<sub>s</sub> values calculated for a 2,000 bp-wide genomic region centered on a CpG site; z = coverage. The model showing the best fit was selected amongst three different models (y~x; y~x+z, and; y~x\*z). Corresponding adjusted-R squared values are provided as well as the total number of CpG loci considered in each analysis.

| Individual | Coverage | Model | Blood | Model | Liver | Model | Muscle | Model | Omentum | Model | Pancreas | Model | Fat   | Number |
|------------|----------|-------|-------|-------|-------|-------|--------|-------|---------|-------|----------|-------|-------|--------|
| IT15       | 500      | y~x+z | 0.680 | y~x+z | 0.661 | y~x+z | 0.727  | y~x+z | 0.714   | y~x+z | 0.685    | y~x+z | 0.722 | 937    |
|            | 450      | y~x+z | 0.615 | y~x+z | 0.612 | y~x+z | 0.686  | y~x+z | 0.659   | y~x+z | 0.639    | y~x+z | 0.697 | 2139   |
|            | 400      | y~x+z | 0.588 | y~x+z | 0.465 | y~x+z | 0.626  | y~x+z | 0.525   | y~x+z | 0.620    | y~x+z | 0.470 | 4827   |
|            | 350      | y~x+z | 0.539 | y~x   | 0.455 | y~x   | 0.629  | y~x+z | 0.534   | y~x+z | 0.601    | y~x+z | 0.542 | 10421  |
|            | 300      | y~x+z | 0.482 | y~x+z | 0.485 | y~x+z | 0.582  | y~x+z | 0.548   | y~x+z | 0.482    | y~x+z | 0.562 | 20830  |
|            | 250      | y~x+z | 0.498 | y~x+z | 0.440 | y~x+z | 0.547  | y~x+z | 0.491   | y~x+z | 0.486    | y~x+z | 0.543 | 390007 |
|            | 200      | y~x+z | 0.496 | y~x+z | 0.458 | y~x+z | 0.521  | y~x+z | 0.519   | y~x+z | 0.521    | y~x+z | 0.528 | 68873  |
|            | 150      | y~x+z | 0.506 | y~x+z | 0.487 | y~x+z | 0.545  | y~x+z | 0.542   | y~x+z | 0.543    | y~x+z | 0.525 | 114561 |
|            | 100      | y~x+z | 0.499 | y~x+z | 0.485 | y~x+z | 0.530  | y~x+z | 0.534   | y~x+z | 0.541    | y~x+z | 0.535 | 182064 |
| IT13       | 500      | y~x+z | 0.683 | y~x+z | 0.663 | y~x+z | 0.723  | y~x+z | 0.703   | y~x+z | 0.695    | y~x+z | 0.722 | 937    |
|            | 450      | y~x+z | 0.629 | y~x+z | 0.628 | y~x+z | 0.682  | y~x+z | 0.643   | y~x+z | 0.652    | y~x+z | 0.696 | 2139   |
|            | 400      | y~x+z | 0.574 | y~x+z | 0.609 | y~x+z | 0.623  | y~x+z | 0.625   | y~x+z | 0.632    | y~x+z | 0.673 | 4827   |
|            | 350      | y~x+z | 0.581 | y~x+z | 0.589 | y~x   | 0.572  | y~x+z | 0.593   | y~x   | 0.616    | y~x+z | 0.538 | 10421  |
|            | 300      | y~x+z | 0.518 | y~x+z | 0.576 | y~x+z | 0.560  | y~x+z | 0.554   | y~x+z | 0.584    | y~x+z | 0.540 | 20830  |
|            | 250      | y~x+z | 0.481 | y~x+z | 0.550 | y~x+z | 0.546  | y~x+z | 0.546   | y~x+z | 0.571    | y~x+z | 0.524 | 390007 |
|            | 200      | y~x+z | 0.503 | y~x+z | 0.556 | y~x+z | 0.509  | y~x+z | 0.542   | y~x+z | 0.568    | y~x+z | 0.515 | 68873  |
|            | 150      | y~x+z | 0.515 | y~x+z | 0.548 | y~x+z | 0.537  | y~x+z | 0.532   | y~x+z | 0.580    | y~x+z | 0.549 | 114561 |
|            | 100      | y~x+z | 0.515 | y~x+z | 0.538 | y~x+z | 0.521  | y~x+z | 0.525   | y~x+z | 0.573    | y~x+z | 0.534 | 182064 |

**Table S3.2**

**Levels of Saqqaq M<sub>s</sub> methylation with the methylation levels measured in a variety of somatic tissues from modern human individuals.**

We considered the normalized methylation data available from [Slieker et al. 2013] for individuals IT13 and IT15. See legends of Table S3.1 for further details.

We next performed unsupervised hierarchical clustering analyses in order to evaluate whether methylation levels as measured in the Saqqaq sequence data would support clustering with modern hair tissues. Analyses were first restricted to individuals PT1, PT2, PT3, PT4 and PT5 where methylation levels were surveyed across four different tissues, including hairs (this information was not available for any other individual from the original study, including IT13 and IT15) [Slieker et al. 2013]. We selected the most supported linear model described above in order to predict Saqqaq methylation values from M<sub>s</sub>. We then selected from the Illumina 450k array data all CpG showing at least a 2-fold average difference in methylation levels between pairs of tissues (note that we also found similar clustering results while investigating a more conservative selection scheme where CpGs showing at least a 2-fold average differences between one tissue and all the other tissues altogether; Figure S3.10 and S3.11). Interestingly, CpG showing at least 2-fold higher methylation levels in modern hairs than other tissues ('High') showed greater M<sub>s</sub> values for the Saqqaq than CpG showing at least 2-fold higher methylation levels in other tissues than in modern hairs ('Low'; Figures S3.6-S3-7), regardless of the threshold considered as minimal coverage (even though Figures S3.6-S3-7 refer 100 or 500 coverage thresholds, the full range of possible values from 100 to 500, iterating every 50, was investigated and resulted in similar findings; data not shown). This suggests that for those CpG, the Saqqaq hair M<sub>s</sub> values better fit an expected hair methylation profile than any other tissue profile investigated. Finally, we used the subset of CpG showing at least a 2-fold average difference in methylation levels between pairs of tissues to perform unsupervised clustering using the heatmap() function from R [R Development Core Team 2012]. Predicted Saqqaq methylation values were ignored whenever the absolute values of residuals were greater than 0.1 and forced to zero when negative and to one when superior to one (note that similar clustering was also found in absence of filtering on residuals; data not shown). The analyses were repeated over a full range of minimal coverage (every 50, from 100 to 500), and resulted in similar outcomes. Therefore, the analyses performed with the lower coverage investigated are shown as Figure 5 (information about the specific of CpG sites considered is available upon request). For all coverage threshold

investigated, the Saqqaq specimen was found to cluster together with hair tissues from 5 modern human individuals, in agreement with the nature of the biological material used for reconstructing the Saqqaq genome [Rasmussen et al. 2010]. GREAT version 2.0.2 analysis [McLean et al. 2010], where the top-10% CpGs showing a maximal absolute methylation difference between Saqqaq hairs and the closest of the five modern individuals was challenged against the background of remaining CpGs, revealed no significant annotation categories related to hair biology (hypergeometric test; data not shown). Interestingly, the top-10% array CpGs that showed divergent methylation profiles apparently seemed more often located 50-500 bp away from the TSS than other array CpGs passing our filtering criteria (29.6% vs 27.5%; Figure S3.8). However, this difference was not found significant (chi-square p-value = 0.396). This suggests that the top-10% most divergent CpG sites represent a random sample of the other array CpG sites. That lower coverage did not disrupt this clustering, despite fewer chance events of observing deaminated 5mC, indicates that the *post-mortem* levels of cytosine deamination observed here are compatible with the recovery of a tissue-specific methylation proxy as long as coverage values are superior or equal to 100. Lower minimal coverage requirements were not investigated but could likely be achieved in situations where *post-mortem* deamination levels are higher than those observed in the Saqqaq individual.

Performing the full set of analyses described above but using 1,500 bp-wide regions centered at each CpG (instead of 2,000 bp), we found similar support for stronger correlations and clustering between the Saqqaq and hair methylation levels (minimal coverage investigated ranged from 100 to 400, iterating every 50; Figure S3.9). Using the same approach, we also found that the clustering of the Saqqaq together with modern hair tissues was maintained when considering all CpGs, regardless of possible methylation differences across tissues (one example corresponding to regions with coverage greater or equal to 100 is provided in Figure S3.12). This suggests that CpG sites showing no strong tissue specificity in their methylation patterns do not preclude genuine clustering. Finally, since  $M_s$  provides regional methylation levels as opposed to the single-base methylation values gathered from the Illumina 450K array, we calculated regional methylation values from the Illumina 450K array data. We achieved this by parsing the genomic coordinates of all CpGs from the array and collapsing those that are distant by at best 1,000bp (i.e. the physical distance used on each side of the CpG when calculating  $M_s$  values). We then calculated a regional methylation value for those CpGs by averaging normalized methylation levels. Applying a minimal coverage threshold of 100 for  $M_s$  calculations, such regions exhibited 4.76 CpGs on average (median = 4, min = 2, max = 28). Only regions showing a minimum number of 4 CpGs were considered in order to insure that the average values could represent regional methylation, thereby limiting the impact of potentially aberrant single CpGs (eg. a hyper-methylated CpG located on the shore of an otherwise unmethylated island). We then used  $M_s$  values for Saqqaq at the first array CpG present in a group of collapsed CpGs and performed unsupervised clustering following the same procedure as above. The results are shown in Figure S3.13. This analysis supports the clustering of the Saqqaq data together with modern hairs despite the presence of a fraction of loci where the Saqqaq exhibits estimated methylation values apparently outside the range of the variation observed amongst hair tissues of the five modern individuals analyzed here (Figure S3.13). Such loci were identified as the top-10% CpGs showing a maximal absolute methylation difference for hairs between the Saqqaq and the closest of the five modern individuals. GREAT analysis was performed against the background of CpGs used for clustering in order to test for possible enrichment in specific GO molecular functions (hypergeometric test) [McLean et al. 2010]. No significant GO category was identified following Bonferroni correction for multiple testing (data not shown). All in all, those analyses support the validity of our methylation estimates and demonstrate that genuine methylation

information can be recovered from past individuals using next-generation sequencing information in absence of bisulfite treatment.

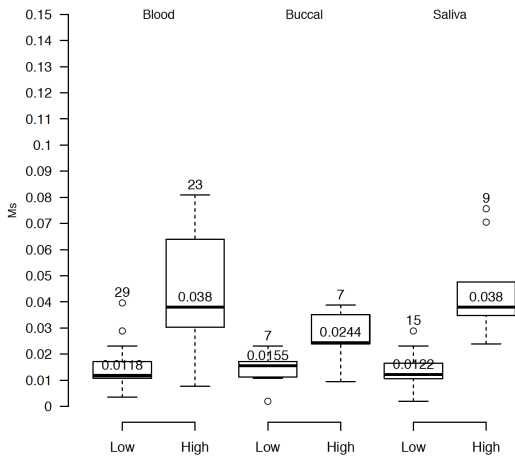

**Figure S3.6**

**Comparing methylation levels in the Saqqqa hairs at CpG showing 2-fold difference methylation in modern tissues.**

We identified CpG from the Illumina 450k array showing at least 2-fold higher methylation in modern hairs than other tissues (blood, buccal or saliva; 'High') and CpG from the Illumina 450k array showing at least 2-fold lower methylation in modern hairs than other tissues ('Low').  $M_s$  values were greater for the 'High' CpG set and lower for the 'Low' CpG set, in agreement with known methylation levels in modern hairs. We considered a minimal coverage threshold of 500. The total number of CpG regions from the array is reporting above the boxplots. Median  $M_s$  values are also indicated.

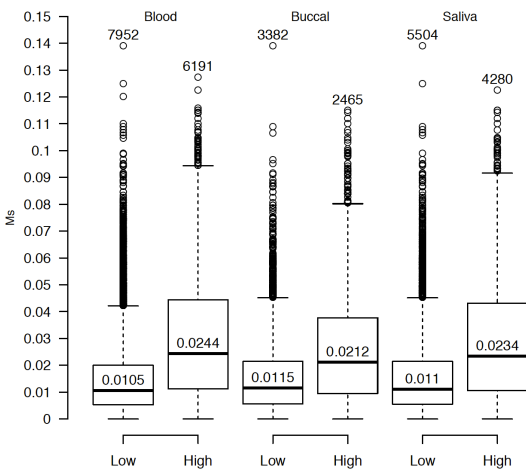

**Figure S3.7**

**Comparing methylation levels in the Saqqqa hairs at CpG showing 2-fold difference methylation in modern tissues.**

We identified CpG from the Illumina 450k array showing at least 2-fold higher methylation in modern hairs than other tissues (blood, buccal or saliva; 'High') and CpG from the Illumina 450k array showing at least 2-fold lower methylation in modern hairs than other tissues ('Low').  $M_s$  values were greater for the 'High' CpG set and lower for the 'Low' CpG set, in agreement with known methylation levels in modern hairs. We considered a minimal coverage threshold of 100. The total number of CpG regions from the array is reporting above the boxplots. Median  $M_s$  values are also indicated.

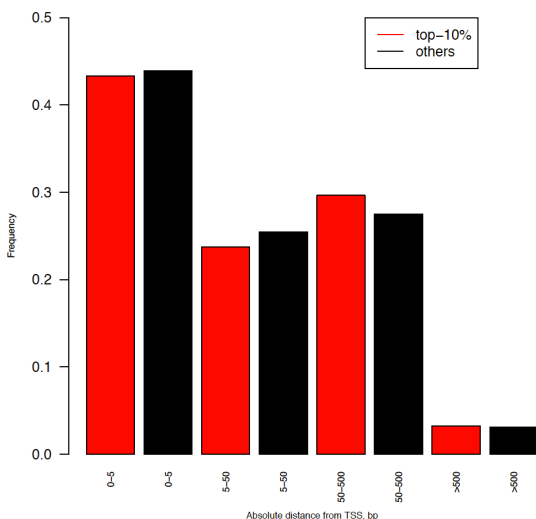

**Figure S3.8**

**Distribution of the absolute distance of array CpGs from TSS.**

Red: top-10% CpG sites with a methylation profile divergent to modern hair methylation profiles. Black: other CpG sites. CpG sites correspond to the clustering analysis presented in Figure 5.

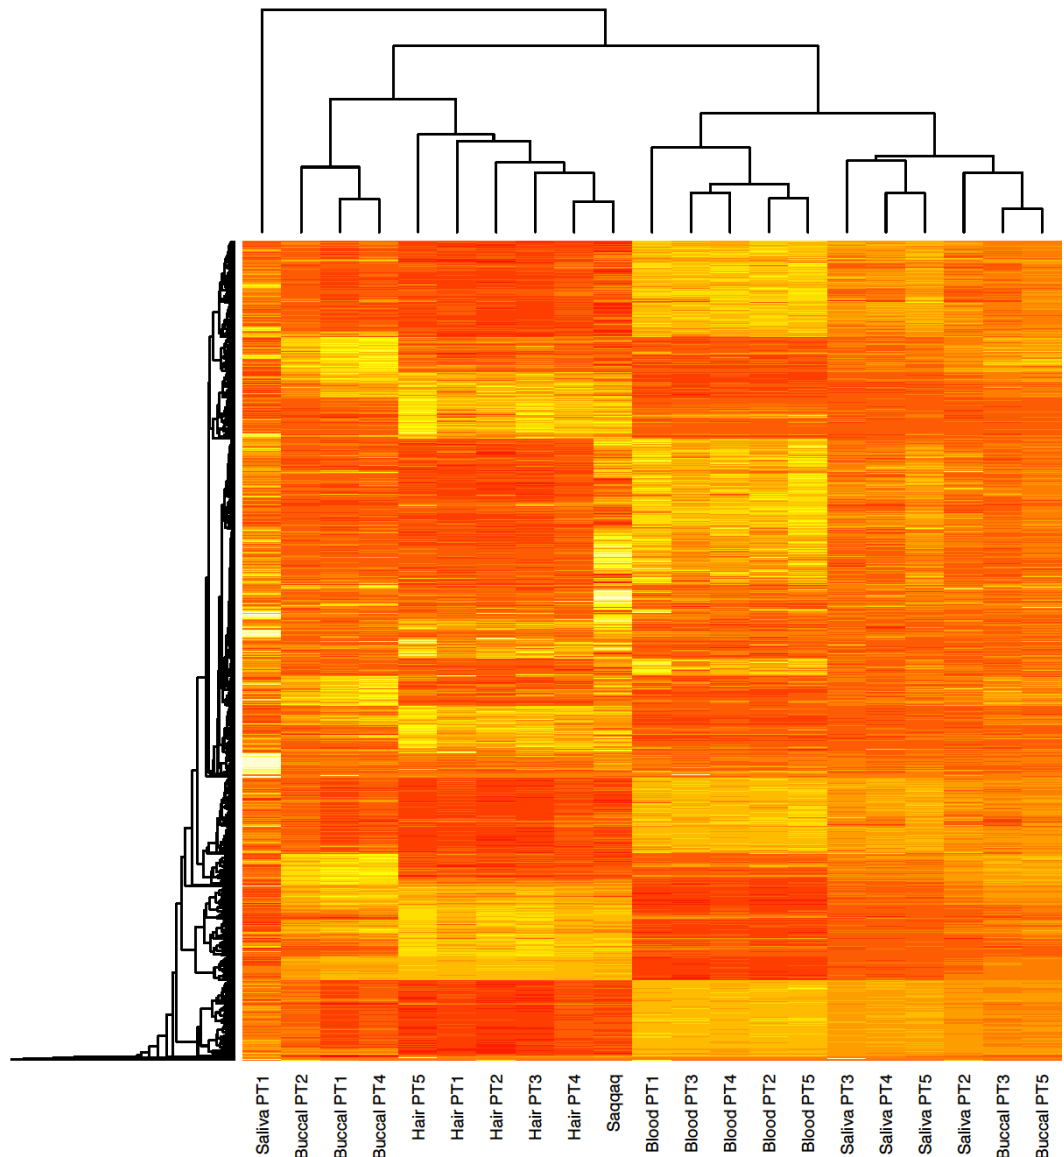

**Figure S3.9**

**Unsupervised hierarchical clustering of the Saqqaq and modern human tissues based on methylation levels.**

See Figure S3.10 for details, except that the regions considered were 1,500 bp-wide. A minimal coverage of 100 was required. A total number of 4,939 CpG showing at least a 2-fold difference in methylation levels between pairs of tissues for modern humans PT1, PT2, PT3, PT4 and PT5 were considered for unsupervised hierarchical clustering. The list of CpGs considered is available upon request.

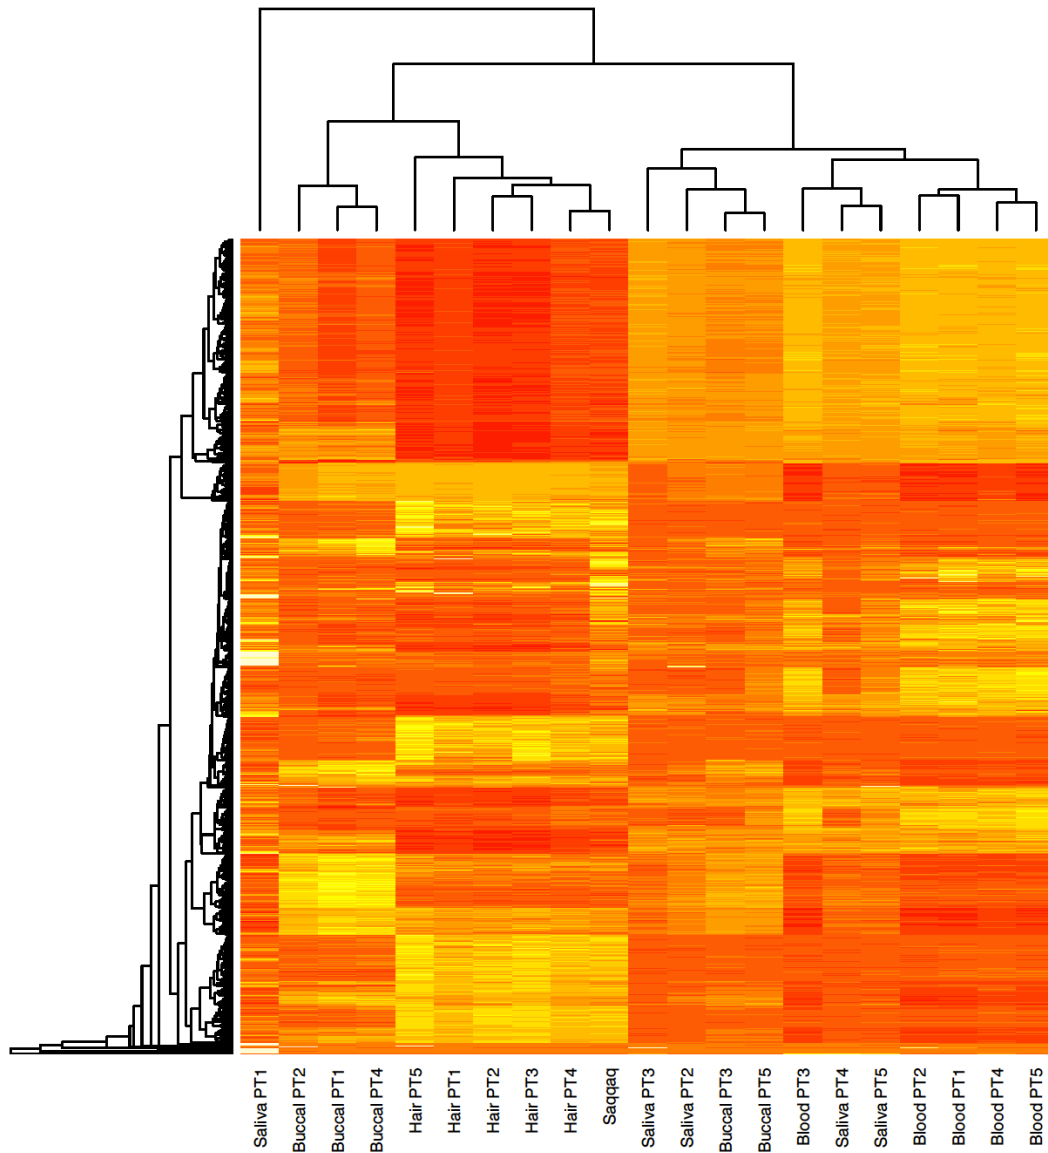

**Figure S3.10**

**Unsupervised hierarchical clustering of the Saqqaq and modern human tissues based on methylation levels.**

Same as Figure 5, except that a more conservative selection scheme was considered where CpGs showing at least a 2-fold average differences between one tissue and all the other tissues. This represented a total number of 2,607 CpG sites.

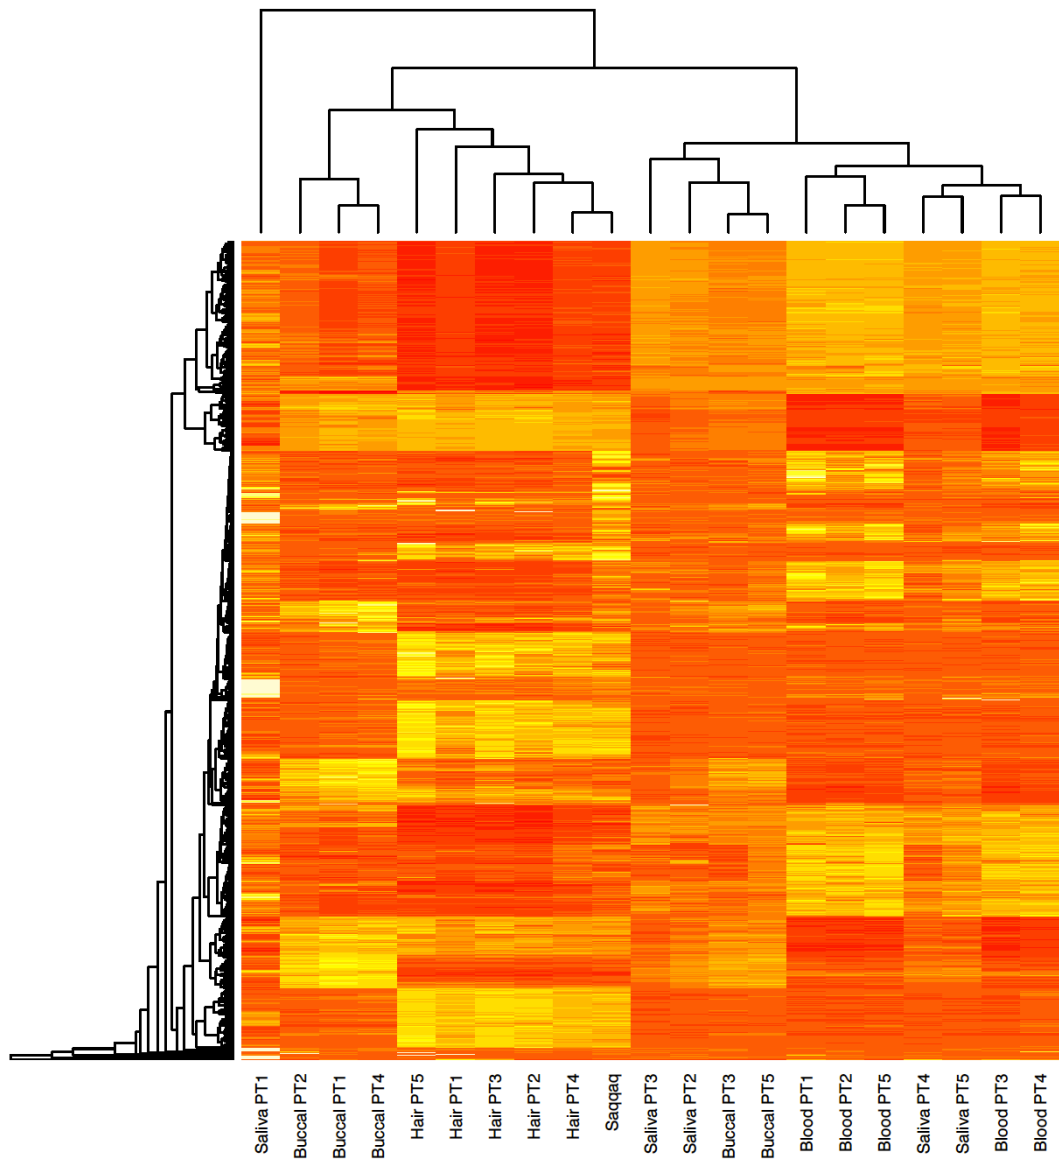

**Figure S3.11**

**Unsupervised hierarchical clustering of the Saqqaq and modern human tissues based on methylation levels.**

Same as Figure S3.9, except that a more conservative selection scheme was considered where CpGs showing at least a 2-fold average differences between one tissue and all the other tissues. This represented a total number of 1,722 CpG sites.



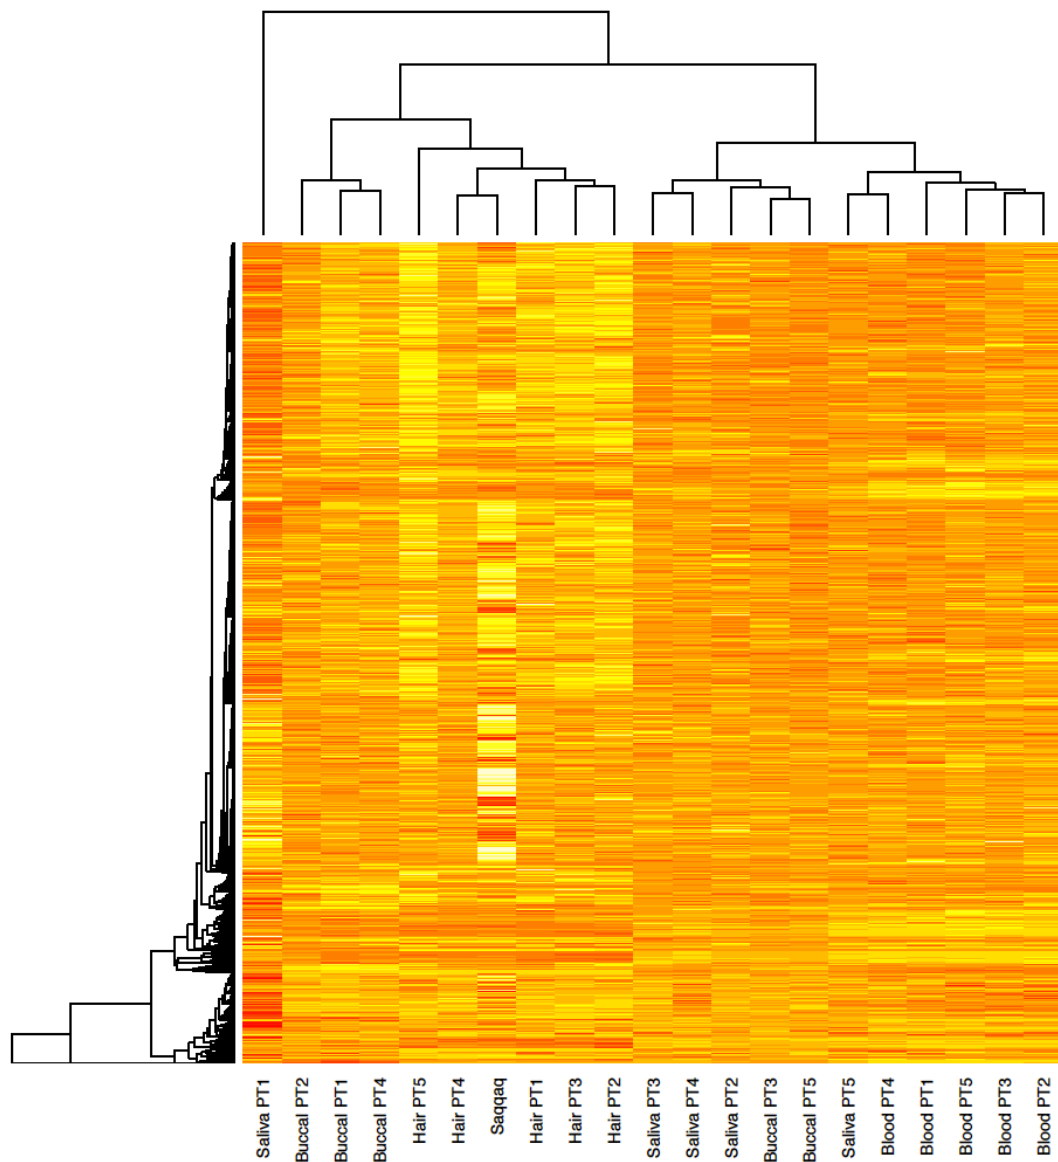

**Figure S3.12**

**Unsupervised hierarchical clustering of the Saqqaq and modern human tissues based on methylation levels.**

Same as Figure S3.10, except that all CpGs passing coverage threshold were considered, regardless of their respective level of methylation difference across tissues. A minimal coverage threshold of 100 was applied and a total number of 45,016 CpG was considered.

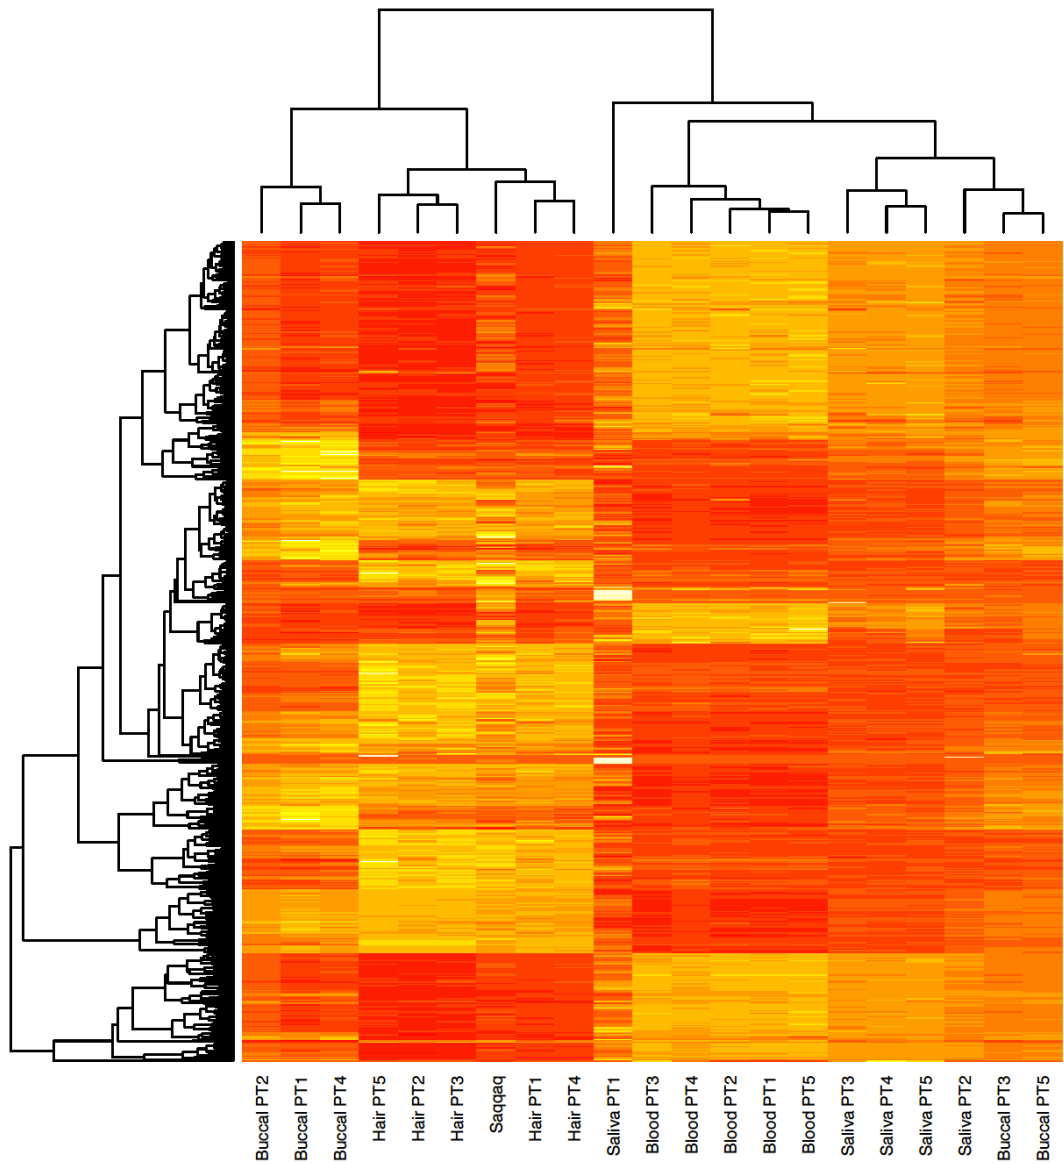

**Figure S3.13**

**Unsupervised hierarchical clustering of the Saqqaq and modern human tissues based on methylation levels.**

Same as Figure S3.10, except that array CpGs located within 1,000 bp were collapsed in order to estimate regional methylation levels for modern individuals. A minimal coverage threshold of 100 was applied and a total number of 685 collapsed regions containing 4,102 CpGs was considered.

### 3.5. Promoter and first exon methylation levels

We downloaded from the UCSC genome browser all gene annotations available for the human reference genome hg18 and calculated the distribution of  $M_s$  values for each gene within their promoter region. Promoters were defined as the 1,000 bp located upstream of the transcription starting site (TSS). The top-1% promoters showing highest coverage but  $M_s$  values equal to zero are provided in Table S3.3. Those represent a total number of 266 UCSC candidate promoters (of which 168 are not redundant) virtually devoid of cytosine methylation in the Saqqaq genome (this list could be extended to 1,311 genes if the top-5% was considered instead of the top-1%). The lack of detectable methylation levels despite extensive coverage excludes promoter cytosine methylation as one important mechanism controlling the expression of those genes. Likewise, we identified the top-1% promoters showing highest methylation levels (Table S3.4). In order to correct for possible coverage issues, we first selected all genes showing a minimum coverage of 75 over their full gene body. We also required a minimum coverage of 25 for the promoter region (given the observed deamination levels, ca. 4% at read starts, this gives on average one chance to observe one CpG→TpG conversion). We then selected genes where coverage at promoters was at least equivalent to that observed within gene bodies (correcting for length differences between both regions). Our list of 300 UCSC candidates for highest methylation levels is provided in Table S3.4 (214 are not redundant). This list likely includes a substantial fraction of loci (but not uniquely) whose expression was silenced in Saqqaq hairs.

Additionally, and encouraged by the overall methylation profile observed at GC skew CGI promoters (Supplementary Section S3.4; Figure S3.4), we also attempted to identify which promoters were closely matching such a pattern.  $M_s$  values were calculated within 4 successive 1kb windows located within 2kb upstream and downstream of TSS. We then identified which promoters showed minimal  $M_s$  values in the second region (i.e. the first kb upstream of TSS) and were associated with (i) at least doubled  $M_s$  values in the preceding kb, (ii) a 50%  $M_s$  increase in the third region (the first kb downstream of TSS) and (iv) with at least a further 2-fold increase in the following region. This pattern was in agreement with average methylation differences observed across those regions at GC skew CGI promoters (Figure S3.4). Requiring a minimum coverage of 25 for each of the four regions, we identified a total number of 402 promoters matching the expected profile, which represented ca. 5.6% (402/7,214) of the promoters considered (Table S3.5).

Finally, we calculated the distribution of  $M_s$  values for each gene within their first exonic region, following criteria similar to those used for identifying promoters with highest methylation levels. Interestingly,  $M_s$  values at the first exon were found to be significantly correlated with promoter  $M_s$  values (Spearman correlation coefficient = 0.318, p-value <  $2.2 \cdot 10^{-16}$ ), in agreement with recent reports [Brenet et al. 2011]. Given the tight association between transcriptional silencing and methylation levels at the first exon [Brenet et al. 2011], the 214 genes showing highest (top-1%) methylation in this region (159 of which are not redundant; Table S3.6) could potentially provide insights about downregulated cellular functions in the Saqqaq hairs. Potential functional insights inferred from methylation levels and nucleosomal positioning are further discussed in an independent section (SI4).

| Name           | UCSC                                                                         | Coordinates               | Cov(PM) |
|----------------|------------------------------------------------------------------------------|---------------------------|---------|
| ZNF362         | uc001bxc.1                                                                   | chr1:33493761-33494761    | 254     |
| AK3L1          | uc001dca.1                                                                   | chr1:65385474-65386474    | 261     |
| SYDE2          | uc009wcm.1,uc001dku.2                                                        | chr1:85439316-85440316    | 289     |
| WNT3A          | uc001hrp.1,uc001hrq.1                                                        | chr1:226260375-226261375  | 234     |
| C1orf124       | uc001hur.1,uc001hus.1,uc001hut.1                                             | chr1:229539305-229540305  | 242     |
| PLD5           | uc001hzn.1                                                                   | chr1:240754328-240755328  | 228     |
| AHCTF1         | uc001ibv.1                                                                   | chr1:245161346-245162346  | 252     |
| GEN1           | uc002rcu.1                                                                   | chr2:17797895-17798895    | 248     |
| SOS1           | uc002rrk.2                                                                   | chr2:39201108-39202108    | 230     |
| PRKCE          | uc002rut.1                                                                   | chr2:45731547-45732547    | 275     |
| RTN4           | uc002ryd.1                                                                   | chr2:55129830-55130830    | 231     |
| BCL2L11        | uc002tgt.1,uc002tqu.1,uc002tqv.1                                             | chr2:111593962-111594962  | 232     |
| DLX1           | uc010fqi.1,uc002uhl.1,uc002uhm.1                                             | chr2:172657454-172658454  | 241     |
| OSBPL6         | uc002ulw.2,uc002ulx.1,uc002uly.1                                             | chr2:178766620-178767620  | 246     |
| GULP1          | uc002uqq.1                                                                   | chr2:188864804-188865804  | 227     |
| SATB2          | uc002uuy.1                                                                   | chr2:200031064-200032064  | 253     |
| FAM119A        | uc002vce.2,uc010fuk.1                                                        | chr2:208198218-208199218  | 243     |
| DNPEP          | uc002vff.1                                                                   | chr2:219960777-219961777  | 235     |
| GBX2           | uc002vww.1                                                                   | chr2:236741391-236742391  | 298     |
| CRELD1         | uc003buf.1,uc003bug.1,uc003buh.1,uc003bui.1                                  | chr3:9949506-9950506      | 234     |
| slac2-c        | uc010hxx.1                                                                   | chr3:39825982-39826982    | 258     |
| TCTA           | uc003cww.2                                                                   | chr3:49423643-49424643    | 250     |
| DOCK3          | uc003dbb.1                                                                   | chr3:50686676-50687676    | 278     |
| THOC7          | uc003dit.2,uc003dlu.2                                                        | chr3:63824637-63825637    | 255     |
| SCA7           | uc010hnu.1                                                                   | chr3:63824273-63825273    | 332     |
| ATXN7          | uc003dlv.2,uc010hmv.1,uc003dlw.2                                             | chr3:63824273-63825273    | 332     |
| CDV3           | uc003epr.1                                                                   | chr3:134774991-134775991  | 326     |
| TMEM175        | uc010ibl.1,uc003gbq.1,uc003gbr.1,uc003gbs.1,uc003gbt.1,uc003gbu.1,uc003gbv.1 | chr4:915262-916262        | 260     |
| DKFZp547K246   | uc003gbb.1                                                                   | chr4:915262-916262        | 260     |
| NOP14          | uc003qqj.1,uc003qqk.2,uc003qql.2,uc010icq.1                                  | chr4:2934916-2935916      | 228     |
| RGS12          | uc003qqu.2,uc010ics.1                                                        | chr4:3263553-3264553      | 246     |
| KLF3           | uc003qtq.2,uc003qth.2                                                        | chr4:38341185-38342185    | 317     |
| FAM47D         | uc003hiv.1                                                                   | chr4:77353217-77354217    | 248     |
| PGRMC2         | uc003iqg.1                                                                   | chr4:129428398-129429398  | 232     |
| PDGFC          | uc003iph.1,uc003ipi.1                                                        | chr4:158111996-158112996  | 251     |
| ANKRD37        | uc003ixm.1                                                                   | chr4:186553834-186554834  | 231     |
| PLK2           | uc003jrm.1                                                                   | chr5:57791670-57792670    | 253     |
| SFRS12         | uc003juo.1                                                                   | chr5:65475419-65476419    | 229     |
| PRDM6          | uc003kti.1,uc003ktj.1                                                        | chr5:122452916-122453916  | 250     |
| VDAC1          | uc003kyp.1,uc003kyq.1                                                        | chr5:133368332-133369332  | 263     |
| TCF7           | uc003kyz.1,uc003kza.1                                                        | chr5:133478499-133479499  | 260     |
| EIF4E1B        | uc010jfk.1                                                                   | chr5:175989289-175990289  | 253     |
| BMP6           | uc003mxu.2                                                                   | chr6:7671010-7672010      | 238     |
| HS3ST5         | uc003pwh.2                                                                   | chr6:114770233-114771233  | 282     |
| TCBA1          | uc010kep.1,uc003pzp.1,uc010keq.1                                             | chr6:124165768-124166768  | 323     |
| NKAIN2         | uc003pzn.1,uc003pzo.1                                                        | chr6:124165768-124166768  | 323     |
| MAP3K7IP2      | uc003qmi.1                                                                   | chr6:149679756-149680756  | 228     |
| FGFR10P        | uc003qvi.1,uc003qvk.1                                                        | chr6:167331806-167332806  | 227     |
| CCR6           | uc003qvl.1                                                                   | chr6:167331806-167332806  | 227     |
| C7orf23        | uc003uio.1                                                                   | chr7:86686967-86687967    | 255     |
| RELN           | uc003vca.1,uc010liz.1                                                        | chr7:103417198-103418198  | 263     |
| KIAA1862       | uc010lpi.1                                                                   | chr7:149042035-149043035  | 270     |
| KRBA1          | uc003wfw.1                                                                   | chr7:149042081-149043081  | 282     |
| WHSC1L1        | uc003xli.1,uc010lwe.1,uc003xli.1                                             | chr8:38358947-38359947    | 260     |
| XKR4           | uc003xsf.1                                                                   | chr8:56176571-56177571    | 236     |
| PLAG1          | uc003xsr.2,uc010lyi.1,uc010lyj.1                                             | chr8:57286413-57287413    | 271     |
| MAFA           | uc003yyc.1                                                                   | chr8:144583719-144584719  | 343     |
| EEF1D          | uc003yyr.1,uc003yys.1,uc003yyt.1,uc003yyu.1,uc003yyv.1                       | chr8:144750726-144751726  | 329     |
| TIGD5          | uc003yyx.1                                                                   | chr8:144750364-144751364  | 328     |
| SCRIB          | uc003yzo.1,uc003yvp.1                                                        | chr8:144969537-144970537  | 355     |
| PUF60          | uc003yqz.1,uc003yvr.1                                                        | chr8:144983197-144984197  | 302     |
| pp9320         | uc010mfmm.1                                                                  | chr8:144994389-144995389  | 263     |
| KIFC2          | uc003zcc.1                                                                   | chr8:145661546-145662546  | 235     |
| ZNF7           | uc003zeg.2,uc010mge.1,uc003zeh.2                                             | chr8:146022707-146023707  | 284     |
| RNF38          | uc003zzh.1,uc003zzi.1                                                        | chr9:36390296-36391296    | 388     |
| PIP5K1B        | uc004agu.1                                                                   | chr9:70509436-70510436    | 269     |
| C9orf85        | uc004ain.1,uc010mot.1,uc010mou.1,uc010mov.1                                  | chr9:73715243-73716243    | 268     |
| PTCH1          | uc010mrq.1,uc004avl.2                                                        | chr9:97310143-97311143    | 285     |
| PPP2R4         | uc004bxm.1,uc004bxn.1,uc004bxo.1                                             | chr9:130912434-130913434  | 240     |
| DKFZp781M17165 | uc010myr.1                                                                   | chr9:130912434-130913434  | 240     |
| CAMSAP1        | uc004cgr.2                                                                   | chr9:137938826-137939826  | 290     |
| SEC16A         | uc004chx.1,uc010nbo.1                                                        | chr9:138497328-138498328  | 357     |
| PFKP           | uc001iqg.1                                                                   | chr10:3099819-3100819     | 264     |
| ARHGAP21       | uc009xkl.1                                                                   | chr10:25052175-25053175   | 300     |
| ITGB1          | uc001fiws.2                                                                  | chr10:33286828-33287828   | 269     |
| GLUD1          | uc001keq.1                                                                   | chr10:88843807-88844807   | 268     |
| FAM35A         | uc001kei.2                                                                   | chr10:88843933-88844933   | 263     |
| LIPA           | uc001kqb.2,uc001kqc.2                                                        | chr10:91164362-91165362   | 241     |
| GALNAC4S-6ST   | uc001lhm.1                                                                   | chr10:125841898-125842898 | 254     |
| STK32C         | uc001lld.1                                                                   | chr10:133970706-133971706 | 368     |
| PDDC1          | uc001lrc.1,uc001lrd.2,uc001lrf.1,uc009ycq.1                                  | chr11:767487-768487       | 227     |
| PHLDA2         | uc009yds.1,uc001lxa.1                                                        | chr11:2907170-2908170     | 263     |
| TP53I11        | uc001myi.1                                                                   | chr11:44928287-44929287   | 325     |
| SYT7           | uc001nrv.1,uc009ynr.1                                                        | chr11:61104874-61105874   | 238     |
| GPR137         | uc001nqz.1                                                                   | chr11:63808907-63809907   | 242     |
| LRFN4          | uc001ojs.2,uc001ojr.1                                                        | chr11:66380572-66381572   | 287     |
| PITPNM1        | uc001olx.1                                                                   | chr11:67028416-67029416   | 245     |
| APOLD1         | uc001rau.2                                                                   | chr12:12769130-12770130   | 229     |
| DDX47          | uc001rav.1                                                                   | chr12:12769130-12770130   | 229     |
| AEBP2          | uc001req.1                                                                   | chr12:19483782-19484782   | 238     |
| TMTC1          | uc001rjc.1                                                                   | chr12:29827246-29828246   | 254     |
| BICD1          | uc001rku.1,uc001rvk.1                                                        | chr12:32150452-32151452   | 263     |

|               |                                                                   |                           |     |
|---------------|-------------------------------------------------------------------|---------------------------|-----|
| SCN8A         | uc001ryw.1                                                        | chr12:50270287-50271287   | 277 |
| DKFZp761C241  | uc001tdw.1                                                        | chr12:94134972-94135972   | 238 |
| APAF1         | uc001tfy.1,uc001tfz.1,uc001tqa.1,uc001tqb.1,uc001tqc.1            | chr12:97562209-97563209   | 238 |
| TMEM116       | uc001ttc.1,uc001ttt.1,uc001tte.1,uc001ttf.1,uc001tth.1,uc001tti.1 | chr12:110935318-110936318 | 240 |
| RAB35         | uc001txm.1,uc009zww.1                                             | chr12:119038982-119039982 | 227 |
| CCDC92        | uc001ufw.1,uc001ufy.1,uc001ufx.1                                  | chr12:123023116-123024116 | 340 |
| ZNF664        | uc001uqa.1,uc001uqb.1                                             | chr12:123022733-123023733 | 317 |
| PXMP2         | uc001ukt.1                                                        | chr12:131773265-131774265 | 261 |
| TSC22D1       | uc001uzo.1                                                        | chr13:44048392-44049392   | 288 |
| PCDH9         | uc001vik.1,uc001vil.1,uc001vin.2                                  | chr13:66702464-66703464   | 237 |
| KLF12         | uc010aeq.1                                                        | chr13:73606395-73607395   | 245 |
| ARHGAP5       | uc001wrm.1,uc001wrn.1,uc001wro.1,uc001wrp.1                       | chr14:31615246-31616246   | 232 |
| CCNK          | uc001yqi.2,uc001yqq.2                                             | chr14:99016492-99017492   | 324 |
| EVL           | uc001yqt.1                                                        | chr14:99506904-99507904   | 263 |
| CDC42BPB      | uc001ymi.1                                                        | chr14:102593495-102594495 | 289 |
| EIF5          | uc001yms.1                                                        | chr14:102869469-102870469 | 242 |
| CKB           | uc001yne.1                                                        | chr14:103057774-103058774 | 384 |
| TMEM121       | uc010axm.1                                                        | chr14:105065217-105066217 | 265 |
| GABRB3        | uc001zaz.1                                                        | chr15:24569344-24570344   | 259 |
| PAK6          | uc001zlb.2                                                        | chr15:38331671-38332671   | 242 |
| LOC196993     | uc002ata.2                                                        | chr15:69194893-69195893   | 250 |
| PKM2          | uc010bit.1                                                        | chr15:70309117-70310117   | 234 |
| KIAA1024      | uc002bew.1                                                        | chr15:77510913-77511913   | 295 |
| AXIN1         | uc002cqp.1,uc002cqq.1                                             | chr16:342465-343465       | 322 |
| SOX8          | uc002ckn.1                                                        | chr16:970809-971809       | 314 |
| CACNA1H       | uc002cks.1,uc002ckt.1                                             | chr16:1142242-1143242     | 298 |
| ADCY9         | uc002cvx.1                                                        | chr16:4106187-4107187     | 300 |
| DKFZp564M1672 | uc002cxu.1                                                        | chr16:4792164-4793164     | 235 |
| UBN1          | uc002cyb.1                                                        | chr16:4836913-4837913     | 396 |
| MAP1LC3B      | uc002fix.1                                                        | chr16:85982320-85983320   | 250 |
| SPG7          | uc002fni.1,uc002fnj.1                                             | chr16:88101306-88102306   | 271 |
| ZNF276        | uc002fos.2                                                        | chr16:88314453-88315453   | 322 |
| ZMYND15       | uc002fvt.1                                                        | chr17:4589086-4590086     | 270 |
| KCTD11        | uc002qge.2                                                        | chr17:7194932-7195932     | 232 |
| MYH10         | uc002gll.1,uc002glm.1,uc010cnx.1                                  | chr17:8474761-8475761     | 239 |
| ZSWIM7        | uc002gpe.1,uc002gpf.1                                             | chr17:15843731-15844731   | 263 |
| CDK5R1        | uc002hnn.1                                                        | chr17:27837218-27838218   | 392 |
| SMARCD2       | uc010dea.1                                                        | chr17:59273558-59274558   | 249 |
| MFSD11        | uc002jtd.2,uc010dhd.1,uc002jte.1                                  | chr17:72244723-72245723   | 243 |
| USP36         | uc002jwa.1                                                        | chr17:74348204-74349204   | 266 |
| CBX8          | uc002jxd.1                                                        | chr17:75385485-75386485   | 250 |
| RAC3          | uc002kdf.1                                                        | chr17:77581821-77582821   | 334 |
| RFNG          | uc002kdj.1                                                        | chr17:77602939-77603939   | 234 |
| ASXL3         | uc010dma.1,uc002kxq.2                                             | chr18:29411539-29412539   | 247 |
| SMAD2         | uc002icy.1                                                        | chr18:43710924-43711924   | 355 |
| DOK6          | uc002ikl.1                                                        | chr18:65218271-65219271   | 247 |
| NETO1         | uc002ikw.2,uc002iky.1                                             | chr18:68685790-68686790   | 290 |
| TXNL4A        | uc010drg.1                                                        | chr18:75894903-75895903   | 309 |
| ADAMTSL5      | uc002itd.1                                                        | chr19:1464019-1465019     | 247 |
| PLK5          | uc002itq.1                                                        | chr19:1474958-1475958     | 332 |
| SF3A2         | uc002ivq.1                                                        | chr19:2186816-2187816     | 247 |
| SAFB2         | uc002mcd.1                                                        | chr19:5573938-5574938     | 289 |
| NFIX          | uc002mwd.1                                                        | chr19:12966584-12967584   | 230 |
| CCNE1         | uc002nsn.1                                                        | chr19:34993741-34994741   | 265 |
| TSHZ3         | uc002nsy.2                                                        | chr19:36532030-36533030   | 274 |
| CEBPA         | uc002nun.1                                                        | chr19:38485160-38486160   | 360 |
| HNRNPUL1      | uc010eho.1                                                        | chr19:46461826-46462826   | 239 |
| SAPS1         | uc002qjw.2                                                        | chr19:60461850-60462850   | 233 |
| LOC284296     | uc002qkz.2                                                        | chr19:60636112-60637112   | 234 |
| SIRPA         | uc002wfs.1,uc002wft.1                                             | chr20:1822826-1823826     | 236 |
| ADRA1D        | uc002wkr.2                                                        | chr20:4177659-4178659     | 273 |
| FOXA2         | uc002wsm.1                                                        | chr20:22513101-22514101   | 238 |
| C20orf24      | uc002xfo.1                                                        | chr20:34635370-34636370   | 242 |
| DBNDD2        | uc002xoe.1                                                        | chr20:43467932-43468932   | 246 |
| CTSA          | uc002xqk.2                                                        | chr20:43952607-43953607   | 242 |
| PARD6B        | uc002xvo.1                                                        | chr20:48780488-48781488   | 266 |
| LSM14B        | uc010qjz.1                                                        | chr20:60130588-60131588   | 342 |
| SLC2A4RG      | uc002yqr.1                                                        | chr20:61841103-61842103   | 383 |
| TIAM1         | uc002yow.1                                                        | chr21:31853161-31854161   | 233 |
| SFRS15        | uc002ypd.1,uc002ype.1,uc010qlu.1                                  | chr21:32026133-32027133   | 249 |
| KIAA1172      | uc002ypq.1                                                        | chr21:32026133-32027133   | 249 |
| AGPAT3        | uc002zdv.1                                                        | chr21:44108544-44109544   | 332 |
| MRPL40        | uc002zpq.1                                                        | chr22:17799036-17800036   | 316 |
| ZNRF3         | uc003aeq.2                                                        | chr22:27608890-27609890   | 266 |
| CARD10        | uc003asx.1,uc003asy.1                                             | chr22:36245170-36246170   | 285 |

**Table S3.3**

**Top-1% mostly covered Saqqaq promoters virtually devoid of cytosine methylation.**

| Name         | UCSC                                                   | Coordinates              | Cov(PM) | M <sub>s</sub> |
|--------------|--------------------------------------------------------|--------------------------|---------|----------------|
| TTL1         | uc001acv.1                                             | chr1:1098146-1099146     | 76      | 0.105          |
| IIP45        | uc009vni.1                                             | chr1:12004477-12005477   | 53      | 0.113          |
| HRIHFB2003   | uc001avr.2                                             | chr1:15158767-15159767   | 36      | 0.111          |
| KIAA0445     | uc001azv.2                                             | chr1:17166285-17167285   | 49      | 0.122          |
| ALPL         | uc001beu.2                                             | chr1:21749394-21750394   | 38      | 0.158          |
| MAP3K6       | uc001bnz.1                                             | chr1:27560945-27561945   | 38      | 0.105          |
| UBE2U        | uc001dbn.1                                             | chr1:64441078-64442078   | 58      | 0.138          |
| GPR61        | uc001dxy.2                                             | chr1:109883017-109884017 | 27      | 0.148          |
| HORMAD1      | uc001evk.1,uc001evi.1,uc001evm.1                       | chr1:14895976-14896076   | 52      | 0.115          |
| MUC1         | uc001fhz.1                                             | chr1:153428022-153429022 | 29      | 0.103          |
| CACNA1E      | uc001gqx.1,uc009wxt.1                                  | chr1:179967143-179968143 | 36      | 0.111          |
| CNTN2        | uc001hbs.1                                             | chr1:203293356-203294356 | 44      | 0.114          |
| SLC26A9      | uc001hdo.1                                             | chr1:204164137-204165137 | 27      | 0.185          |
| OBSGN        | uc001hsn.1,uc009xez.1                                  | chr1:226461484-226462484 | 48      | 0.104          |
| COLEC11      | uc002qxz.1,uc002qya.1,uc002qyb.1,uc002qyc.1,uc010ewo.1 | chr2:3619512-3620512     | 47      | 0.170          |
| ALLC         | uc010ewt.1                                             | chr2:3682661-3683661     | 47      | 0.128          |
| ADCY3        | uc002zfr.2                                             | chr2:24918040-24919040   | 55      | 0.109          |
| ABCG5        | uc002rtn.1,uc002rto.1,uc002rtp.1                       | chr2:43919462-43920462   | 29      | 0.207          |
| ACTG2        | uc010fex.1,uc002sjw.1,uc010fev.1                       | chr2:73972601-73973601   | 27      | 0.111          |
| CYP27C1      | uc002tod.2                                             | chr2:127679813-127680813 | 58      | 0.103          |
| RAB3GAP1     | uc002tju.1,uc010fnf.1                                  | chr2:135525323-135526323 | 36      | 0.111          |
| DKFZp434A012 | uc010fnq.1                                             | chr2:135525323-135526323 | 36      | 0.111          |
| DGKD         | uc010fyh.1,uc002vuj.1                                  | chr2:233991626-233992626 | 26      | 0.115          |
| KLHL30       | uc002vxr.1                                             | chr2:238713156-238714156 | 58      | 0.103          |
| FLJ00133     | uc002wak.2                                             | chr2:241652388-241653388 | 60      | 0.117          |
| C2orf85      | uc010fzu.1                                             | chr2:242459559-242460559 | 67      | 0.104          |
| C3orf32      | uc003bqz.1                                             | chr3:8761726-8762726     | 34      | 0.118          |
| VGLL4        | uc010hdv.1                                             | chr3:11585398-11586398   | 36      | 0.139          |
| CAND2        | uc003bxx.1                                             | chr3:12831873-12832873   | 34      | 0.118          |
| FGD5         | uc003bzc.1                                             | chr3:14834810-14835810   | 28      | 0.107          |
| SLC6A20      | uc003cow.1                                             | chr3:45788835-45789835   | 28      | 0.179          |
| TESSP2       | uc003caq.1                                             | chr3:46850589-46851589   | 38      | 0.105          |
| KIAA0540     | uc010hjo.1                                             | chr3:47020679-47021679   | 45      | 0.111          |
| RNF123       | uc010hky.1                                             | chr3:49710905-49711905   | 25      | 0.120          |
| NT5DC2       | uc003dem.1                                             | chr3:52537822-52538822   | 52      | 0.154          |
| MORC1        | uc003dxl.1                                             | chr3:110319658-110320658 | 76      | 0.132          |
| IGSF11       | uc003eby.1,uc003ebz.1,uc010hqs.1                       | chr3:120347588-120348588 | 57      | 0.123          |
| SLC41A3      | uc003eii.1                                             | chr3:127258308-127259308 | 39      | 0.154          |
| C3orf56      | uc003eji.1                                             | chr3:128393664-128394664 | 76      | 0.118          |
| ABTB1        | uc010hsm.1                                             | chr3:128877500-128878500 | 47      | 0.106          |
| CPN2         | uc003fts.1                                             | chr3:195553350-195554350 | 40      | 0.125          |
| TNK2         | uc003fvv.1                                             | chr3:197097073-197098073 | 27      | 0.148          |
| KIAA1530     | uc010ibv.1                                             | chr4:1348865-1349865     | 32      | 0.156          |
| TACC3        | uc010ica.1                                             | chr4:1701697-1702697     | 28      | 0.143          |
| ZFYVE28      | uc003qew.1                                             | chr4:2312606-2313606     | 78      | 0.154          |
| RGS12        | uc003qhb.2                                             | chr4:3383754-3384754     | 45      | 0.133          |
| TBC1D14      | uc003qiu.2                                             | chr4:7052696-7053696     | 41      | 0.122          |
| ACOX3        | uc003gle.1                                             | chr4:8468626-8469626     | 48      | 0.125          |
| GPRIN3       | uc003hsm.1                                             | chr4:90448184-90449184   | 28      | 0.107          |
| C4orf32      | uc003iah.2                                             | chr4:113285002-113286002 | 38      | 0.105          |
| SLC6A18      | uc003jby.1                                             | chr5:1277470-1278470     | 61      | 0.115          |
| CLPTM1L      | uc003jcg.1                                             | chr5:1394975-1395975     | 51      | 0.137          |
| ANKH         | uc003jfl.2                                             | chr5:14799111-14800111   | 29      | 0.172          |
| LOC153328    | uc003iaz.1,uc003lba.2                                  | chr5:135197264-135198264 | 28      | 0.107          |
| CAMK2A       | uc003lri.1,uc003lru.1,uc010ihe.1                       | chr5:149649529-149650529 | 29      | 0.103          |
| NAF1         | uc010ihl.1,uc010ihj.1                                  | chr5:150423501-150424501 | 39      | 0.128          |
| TNIP1        | uc010ihp.1,uc010ihq.1                                  | chr5:150423501-150424501 | 39      | 0.128          |
| AK127224     | uc003mil.1                                             | chr5:177479705-177480705 | 83      | 0.108          |
| KIAA0676     | uc003mlk.1                                             | chr5:179230101-179231101 | 38      | 0.105          |
| IGNT2        | uc010iol.1                                             | chr6:10599442-10600442   | 68      | 0.103          |
| AX747210     | uc003nak.1                                             | chr6:13403797-13404797   | 28      | 0.107          |
| GRM4         | uc003oio.1,uc010jvj.1                                  | chr6:34138994-34139994   | 26      | 0.115          |
| TCP11        | uc003okd.2,uc003oka.2,uc003okb.2,uc003okc.2            | chr6:35217165-35218165   | 118     | 0.127          |
| TFEB         | uc003oqu.1,uc003oqy.1                                  | chr6:41811975-41812975   | 29      | 0.138          |
| UNC84A       | uc003sji.1                                             | chr7:854683-855683       | 31      | 0.129          |
| KIAA0810     | uc003sik.1                                             | chr7:857410-858410       | 45      | 0.156          |
| C7orf27      | uc003smh.2                                             | chr7:2548679-2549679     | 94      | 0.128          |
| WIPI2        | uc003snz.2,uc003soa.1                                  | chr7:5219426-5220426     | 37      | 0.162          |
| PON1         | uc003uns.1                                             | chr7:94791780-94792780   | 34      | 0.118          |
| AZGP1        | uc003ush.1                                             | chr7:99411623-99412623   | 31      | 0.129          |
| FLJ23834     | uc003vdl.2,uc003vdm.2                                  | chr7:105389921-105390921 | 27      | 0.148          |
| ASZ1         | uc003vjb.2                                             | chr7:116854813-116855813 | 67      | 0.104          |
| TCRBC2       | uc003wbh.2                                             | chr7:142203493-142204493 | 36      | 0.139          |
| ARHGEF10     | uc010lre.1                                             | chr8:1817208-1818208     | 93      | 0.108          |
| PTK2B        | uc010luq.1,uc003xfr.1                                  | chr8:27343310-27344310   | 42      | 0.119          |
| CLU          | uc003xfv.1                                             | chr8:27525085-27526085   | 35      | 0.114          |
| PTP4A3       | uc003ywg.1,uc003ywh.1                                  | chr8:142500189-142501189 | 85      | 0.106          |
| hPRL-3       | uc010met.1                                             | chr8:142500189-142501189 | 85      | 0.106          |
| SPATC1       | uc003zaq.1                                             | chr8:145157595-145158595 | 26      | 0.115          |
| WNK2         | uc004atl.1                                             | chr9:95089891-95090891   | 26      | 0.115          |
| CORO2A       | uc004ayl.1                                             | chr9:99974995-99975995   | 45      | 0.111          |
| ANKS6        | uc004ayv.1                                             | chr9:100579557-100580557 | 29      | 0.241          |
| GSN          | uc004biq.1                                             | chr9:123112570-123113570 | 26      | 0.115          |
| UNQ6496      | uc004brq.1                                             | chr9:129296297-129297297 | 29      | 0.103          |
| SH2D3C       | uc004brz.2                                             | chr9:129564518-129565518 | 37      | 0.216          |
| ODF2         | uc004bvf.1                                             | chr9:130261650-130262650 | 26      | 0.115          |
| KIAA0515     | uc004cao.2                                             | chr9:133334996-133335996 | 41      | 0.122          |
| DBH          | uc004cel.1                                             | chr9:135490306-135491306 | 38      | 0.105          |
| FLJ00280     | uc004cfd.1                                             | chr9:136447825-136448825 | 44      | 0.114          |
| MAN1B1       | uc004clf.1                                             | chr9:139116621-139117621 | 41      | 0.122          |
| LOC441476    | uc004cmj.1,uc004cmk.1,uc004cml.1,uc010ncd.1            | chr9:139264551-139265551 | 37      | 0.108          |
| NELF         | uc010nci.1                                             | chr9:139470759-139471759 | 38      | 0.158          |

|             |                                                                                                                                     |                           |     |       |
|-------------|-------------------------------------------------------------------------------------------------------------------------------------|---------------------------|-----|-------|
| ERCC6       | uc009xod.1                                                                                                                          | chr10:50354362-50355362   | 28  | 0.107 |
| LDB3        | uc001kdr.1,uc001kds.1,uc009xsv.1,uc001kdu.1,uc001kdv.1                                                                              | chr10:88417301-88418301   | 31  | 0.161 |
| KIAA0613    | uc009xsx.1                                                                                                                          | chr10:88417301-88418301   | 31  | 0.161 |
| KCNK18      | uc001ldc.1                                                                                                                          | chr10:118945990-118946990 | 25  | 0.120 |
| C10orf141   | uc001lju.1,uc009vap.1                                                                                                               | chr10:128864690-128865690 | 30  | 0.167 |
| INPP5A      | uc001llq.1                                                                                                                          | chr10:134270409-134271409 | 121 | 0.116 |
| FLJ00228    | uc001lov.2                                                                                                                          | chr11:282823-283823       | 48  | 0.104 |
| EFCAB4A     | uc001lrw.2                                                                                                                          | chr11:818297-819297       | 60  | 0.117 |
| KIAA0899    | uc009ycq.1                                                                                                                          | chr11:981000-982000       | 50  | 0.140 |
| HCCA2       | uc001lto.1,uc001ltp.1                                                                                                               | chr11:1458691-1459691     | 65  | 0.108 |
| TNNT3       | uc001lun.2,uc001luu.2,uc001lup.2,uc001luw.2,uc001luo.2,uc001luq.2                                                                   | chr11:1896375-1897375     | 53  | 0.113 |
| C11orf21    | uc009yjd.1,uc001lvv.1                                                                                                               | chr11:2279866-2280866     | 53  | 0.113 |
| APBB1       | uc009yey.1,uc009yez.1,uc009yfa.1,uc001mdd.2,uc009yfb.1                                                                              | chr11:6382668-6383668     | 49  | 0.122 |
| NR1H3       | uc001nej.1,uc001nek.1,uc001nel.1                                                                                                    | chr11:47226043-47227043   | 46  | 0.109 |
| TNKS1BP1    | uc001njp.1,uc001niq.1                                                                                                               | chr11:56827529-56828529   | 35  | 0.114 |
| AB429224    | uc009yxp.1                                                                                                                          | chr11:64417497-64418497   | 59  | 0.119 |
| FLJ00043    | uc001oep.1                                                                                                                          | chr11:65104695-65105695   | 34  | 0.118 |
| CABP2       | uc001omc.1,uc001omd.1,uc001ome.1                                                                                                    | chr11:67047475-67048475   | 56  | 0.143 |
| BC127192    | uc009ysn.1                                                                                                                          | chr11:69995572-69996572   | 34  | 0.118 |
| PLEKHB1     | uc001ouc.1,uc001oud.1                                                                                                               | chr11:73035330-73036330   | 37  | 0.108 |
| CAPN5       | uc001oya.1                                                                                                                          | chr11:76507101-76508101   | 45  | 0.156 |
| FXYD2       | uc001prj.2,uc001prl.2                                                                                                               | chr11:117200669-117201669 | 50  | 0.120 |
| IFFO1       | uc001qoz.1,uc001qpa.1                                                                                                               | chr12:6528535-6529535     | 50  | 0.120 |
| HOM-TES-103 | uc001qpg.2                                                                                                                          | chr12:6528535-6529535     | 50  | 0.120 |
| LAG3        | uc001qqs.2,uc001qqt.2,uc001qqu.2                                                                                                    | chr12:6750931-6751931     | 30  | 0.133 |
| C1RL        | uc001qsn.1,uc009zft.1,uc001qso.1                                                                                                    | chr12:7153069-7154069     | 25  | 0.120 |
| STYK1       | uc001qys.1                                                                                                                          | chr12:10717906-10718906   | 64  | 0.125 |
| COL2A1      | uc009zkw.1                                                                                                                          | chr12:46668521-46669521   | 36  | 0.111 |
| POU6F1      | uc001rxv.1,uc001rxz.1                                                                                                               | chr12:49877085-49878085   | 64  | 0.141 |
| FIGNL2      | uc001rzc.1                                                                                                                          | chr12:50502475-50503475   | 25  | 0.120 |
| NR4A1       | uc001rzz.2,uc009zmc.1                                                                                                               | chr12:50722784-50723784   | 32  | 0.125 |
| GEFT        | uc009zpy.1,uc001soz.1                                                                                                               | chr12:56289230-56290230   | 55  | 0.109 |
| BC061638    | uc009zrx.1                                                                                                                          | chr12:72972678-72973678   | 70  | 0.114 |
| NOS1        | uc001twm.1                                                                                                                          | chr12:116283965-116284965 | 26  | 0.192 |
| MLXIP       | uc001ubt.1                                                                                                                          | chr12:121182783-121183783 | 26  | 0.192 |
| limkain     | uc001ufv.1                                                                                                                          | chr12:122996061-122997061 | 35  | 0.114 |
| KIAA1517    | uc001ugz.1                                                                                                                          | chr12:124003069-124004069 | 27  | 0.222 |
| PGAM5       | uc001ukw.2                                                                                                                          | chr12:131800517-131801517 | 27  | 0.111 |
| DNAJC15     | uc001uyv.1                                                                                                                          | chr13:42494362-42495362   | 26  | 0.192 |
| ADPRHL1     | uc001vtq.1                                                                                                                          | chr13:113155840-113156840 | 47  | 0.106 |
| ATP4B       | uc001vtz.1,uc010aqy.1                                                                                                               | chr13:113360502-113361502 | 107 | 0.140 |
| C14orf104   | uc001wvs.2,uc001wwt.2                                                                                                               | chr14:49171698-49172698   | 26  | 0.154 |
| PAPLN       | uc010arm.1                                                                                                                          | chr14:72796170-72797170   | 38  | 0.105 |
| KIAA1509    | uc001xzi.1                                                                                                                          | chr14:90819720-90820720   | 25  | 0.120 |
| SLC24A4     | uc010auj.1                                                                                                                          | chr14:91974432-91975432   | 31  | 0.129 |
| SLC25A29    | uc010avv.1                                                                                                                          | chr14:99831824-99832824   | 26  | 0.115 |
| PPP2R5C     | uc001yvk.1                                                                                                                          | chr14:101417251-101418251 | 35  | 0.114 |
| AHNAK2      | uc001yxp.2                                                                                                                          | chr14:104507865-104508865 | 36  | 0.111 |
| FAM82A2     | uc001zmq.1                                                                                                                          | chr15:38835341-38836341   | 29  | 0.103 |
| MAPKBP1     | uc010bcl.1                                                                                                                          | chr15:39891006-39892006   | 28  | 0.107 |
| CAPN3       | uc001zpq.1                                                                                                                          | chr15:40480880-40481880   | 38  | 0.105 |
| BCL2L10     | uc002abq.1                                                                                                                          | chr15:50192264-50193264   | 38  | 0.105 |
| TIPIN       | uc002apr.2                                                                                                                          | chr15:64436108-64437108   | 57  | 0.105 |
| NR2E3       | uc002ath.1,uc002ati.1                                                                                                               | chr15:69888948-69889948   | 30  | 0.133 |
| SEMA4B      | uc010bnv.1                                                                                                                          | chr15:88564850-88565850   | 34  | 0.118 |
| CLCN7       | uc002clu.2                                                                                                                          | chr16:1439799-1440799     | 140 | 0.107 |
| IFT140      | uc002clz.1                                                                                                                          | chr16:1548136-1549136     | 43  | 0.116 |
| DNASE1      | uc002crr.1                                                                                                                          | chr16:3641941-3642941     | 34  | 0.118 |
| JMJD5       | uc010bxw.1                                                                                                                          | chr16:27127915-27128915   | 28  | 0.107 |
| MYST1       | uc002eba.2                                                                                                                          | chr16:31045011-31046011   | 33  | 0.121 |
| ABCC12      | uc002efe.1                                                                                                                          | chr16:46747430-46748430   | 54  | 0.130 |
| SNX20       | uc002egi.2,uc002eqk.1                                                                                                               | chr16:49272667-49273667   | 28  | 0.143 |
| EDC4        | uc002eus.1                                                                                                                          | chr16:66467893-66468893   | 38  | 0.105 |
| BCAR1       | uc002fdt.1                                                                                                                          | chr16:73827902-73828902   | 97  | 0.165 |
| FAM38A      | uc002fjr.2                                                                                                                          | chr16:87330160-87331160   | 110 | 0.136 |
| Mib         | uc010cib.1                                                                                                                          | chr16:87330160-87331160   | 110 | 0.136 |
| AK095785    | uc002fpd.1                                                                                                                          | chr16:88496859-88497859   | 37  | 0.108 |
| TUBB3       | uc002fpk.1                                                                                                                          | chr16:88526821-88527821   | 47  | 0.149 |
| DEF8        | uc002fpq.1                                                                                                                          | chr16:88556749-88557749   | 53  | 0.132 |
| ZZEF1       | uc002fxq.1                                                                                                                          | chr17:3867623-3868623     | 27  | 0.111 |
| ALOX15      | uc002fyh.1                                                                                                                          | chr17:4491709-4492709     | 34  | 0.118 |
| DHX33       | uc002gbz.1                                                                                                                          | chr17:5305407-5306407     | 25  | 0.120 |
| CACNB1      | uc002hrl.1                                                                                                                          | chr17:34603662-34604662   | 34  | 0.118 |
| CALCOCO2    | uc002iof.1                                                                                                                          | chr17:44262371-44263371   | 66  | 0.106 |
| CACNA1G     | uc002irx.1,uc002iry.1,uc002irz.1,uc002isa.1,uc002isb.1,uc002isc.1,uc002isd.1,uc002ise.1,uc002isf.1,uc002isg.1,uc002ish.1,uc002isi.1 | chr17:46000230-46001230   | 32  | 0.188 |
| SDK2        | uc010dfn.1                                                                                                                          | chr17:68945503-68946503   | 33  | 0.121 |
| UBE2O       | uc002jrl.2                                                                                                                          | chr17:71907597-71908597   | 25  | 0.120 |
| AK125672    | uc002jur.1                                                                                                                          | chr17:73644514-73645514   | 50  | 0.120 |
| RNF213      | uc002jyh.1                                                                                                                          | chr17:75927321-75928321   | 59  | 0.136 |
| AK098403    | uc010dhy.1                                                                                                                          | chr17:76701355-76702355   | 67  | 0.104 |
| SLC38A10    | uc002jzy.1                                                                                                                          | chr17:76874109-76875109   | 65  | 0.108 |
| C17orf70    | uc002kao.1                                                                                                                          | chr17:77125977-77126977   | 44  | 0.114 |
| FN3K        | uc002kfw.1                                                                                                                          | chr17:78287866-78288866   | 55  | 0.127 |
| LOXHD1      | uc002lcf.2                                                                                                                          | chr18:42393250-42394250   | 48  | 0.104 |
| MOBK12A     | uc002llu.1                                                                                                                          | chr19:2029718-2030718     | 90  | 0.133 |
| TMPRSS9     | uc002lvv.1,uc002lww.1                                                                                                               | chr19:2339784-2340784     | 29  | 0.138 |
| TBXA2R      | uc002lye.1                                                                                                                          | chr19:3551665-3552665     | 27  | 0.111 |
| FSD1        | uc002maa.1                                                                                                                          | chr19:4261593-4262593     | 43  | 0.116 |
| ALKBH7      | uc002meo.1                                                                                                                          | chr19:6322444-6323444     | 29  | 0.172 |
| KLF1        | uc002mvo.1                                                                                                                          | chr19:12859017-12860017   | 28  | 0.143 |
| CC2D1A      | uc002mxq.1                                                                                                                          | chr19:13889317-13890317   | 41  | 0.146 |
| INSL3       | uc002nhm.1,uc010ebf.1,uc010ebq.1                                                                                                    | chr19:17793320-17794320   | 31  | 0.129 |
| KIAA0892    | uc010ece.1                                                                                                                          | chr19:19318459-19319459   | 33  | 0.152 |
| GRAMD1A     | uc002nxi.1                                                                                                                          | chr19:40176528-40177528   | 35  | 0.114 |

|            |                       |                          |    |       |
|------------|-----------------------|--------------------------|----|-------|
| NTF4       | uc002pmf.2            | chr19:54258936-54259936  | 31 | 0.161 |
| KIAA0654   | uc002pmt.1            | chr19:54336873-54337873  | 29 | 0.103 |
| ASPDH      | uc002psr.2            | chr19:55709759-55710759  | 72 | 0.222 |
| KLK11      | uc002pvf.1            | chr19:56223102-56224102  | 27 | 0.148 |
| SIGLEC12   | uc002pwx.1            | chr19:56696855-56697855  | 35 | 0.171 |
| UNQ9215    | uc010eov.1            | chr19:56696855-56697855  | 35 | 0.171 |
| LILRA2     | uc002qaa.2,uc010ero.1 | chr19:59776110-59777110  | 26 | 0.154 |
| KIAA1398   | uc010qcm.1            | chr20:17565374-17566374  | 42 | 0.119 |
| SGK2       | uc002xkv.1            | chr20:41627151-41628151  | 33 | 0.121 |
| TNFRSF6B   | uc002yfv.1            | chr20:61795538-61796538  | 45 | 0.178 |
| AIRE       | uc002zej.1,uc010qpr.1 | chr21:44533576-44534576  | 62 | 0.113 |
| APECED     | uc010gpp.1            | chr21:44533576-44534576  | 62 | 0.113 |
| C21orf2    | uc010gpp.1            | chr21:44578835-44579835  | 46 | 0.109 |
| COL18A1    | uc002zhk.1            | chr21:45750842-45751842  | 45 | 0.111 |
| ARVCF      | uc002zra.1            | chr22:18358335-18359335  | 31 | 0.129 |
| KIAA0330   | uc010gul.1            | chr22:22896681-22897681  | 27 | 0.111 |
| CRYBB1     | uc003acy.1            | chr22:25343991-25344991  | 33 | 0.121 |
| CYB5R3     | uc003bcw.2            | chr22:41362840-41363840  | 27 | 0.111 |
| PARVB      | uc010qzn.1            | chr22:42752517-42753517  | 37 | 0.108 |
| TBC1D22A   | uc003bif.1            | chr22:45547488-45548488  | 26 | 0.115 |
| C22orf34   | uc003bit.2            | chr22:48437194-48438194  | 45 | 0.111 |
| TRABD      | uc003biv.1,uc003bjw.1 | chr22:48972570-48973570  | 72 | 0.111 |
| dJ402G11.5 | uc010hap.1,uc003bjv.1 | chr22:48985873-48986873  | 77 | 0.117 |
| MAPK12     | uc003bkp.1            | chr22:49036709-49037709  | 41 | 0.146 |
| FLNA       | uc004fki.2            | chrX:153235605-153236605 | 45 | 0.111 |

**Table S3.4**

**Top-1% methylated Saqqaq promoters.**



| Ms(-2000;-1000) | Cov. | Ms(-1000;TSS) | Cov. | Ms(TSS;1000) | Cov. | Ms(1000;2000) | Cov. | TSS             |
|-----------------|------|---------------|------|--------------|------|---------------|------|-----------------|
| 0.1200          | 25   | 0.0000        | 25   | 0.0256       | 31   | 0.0909        | 36   | chr16:66075217  |
| 0.0250          | 40   | 0.0000        | 26   | 0.0227       | 39   | 0.0800        | 54   | chr11:60450096  |
| 0.0250          | 40   | 0.0000        | 26   | 0.0227       | 39   | 0.0800        | 54   | chr11:60450096  |
| 0.0682          | 44   | 0.0000        | 27   | 0.0328       | 88   | 0.1111        | 34   | chr12:107510288 |
| 0.0294          | 34   | 0.0000        | 29   | 0.0078       | 81   | 0.0588        | 29   | chr11:62363707  |
| 0.0750          | 40   | 0.0000        | 29   | 0.0204       | 46   | 0.0784        | 44   | chr14:23723809  |
| 0.0286          | 35   | 0.0000        | 29   | 0.0526       | 33   | 0.1111        | 33   | chr1:203222168  |
| 0.0741          | 27   | 0.0000        | 29   | 0.0208       | 35   | 0.0667        | 37   | chr2:96980965   |
| 0.0638          | 47   | 0.0000        | 30   | 0.0693       | 77   | 0.1429        | 33   | chr1:202493620  |
| 0.0638          | 47   | 0.0000        | 30   | 0.0693       | 77   | 0.1429        | 33   | chr1:202493620  |
| 0.0638          | 47   | 0.0000        | 30   | 0.0693       | 77   | 0.1429        | 33   | chr1:202493620  |
| 0.0638          | 47   | 0.0000        | 30   | 0.0693       | 77   | 0.1429        | 33   | chr1:202493620  |
| 0.0638          | 47   | 0.0000        | 30   | 0.0693       | 77   | 0.1429        | 33   | chr1:202493620  |
| 0.0638          | 47   | 0.0000        | 30   | 0.0693       | 77   | 0.1429        | 33   | chr1:202493620  |
| 0.0286          | 35   | 0.0000        | 31   | 0.0194       | 64   | 0.0758        | 85   | chr19:4509501   |
| 0.0968          | 31   | 0.0000        | 31   | 0.0114       | 103  | 0.0513        | 27   | chr19:53663423  |
| 0.1200          | 50   | 0.0000        | 31   | 0.0221       | 162  | 0.0579        | 76   | chr7:719269     |
| 0.0571          | 35   | 0.0000        | 32   | 0.0208       | 45   | 0.0500        | 62   | chr21:44612431  |
| 0.0278          | 36   | 0.0000        | 32   | 0.0278       | 38   | 0.0909        | 48   | chr9:134850866  |
| 0.0364          | 55   | 0.0000        | 33   | 0.0213       | 53   | 0.0521        | 80   | chr19:5885473   |
| 0.0492          | 61   | 0.0000        | 33   | 0.0323       | 40   | 0.0714        | 59   | chr21:42578058  |
| 0.0714          | 42   | 0.0000        | 34   | 0.0222       | 43   | 0.1136        | 50   | chr14:72797810  |
| 0.0667          | 45   | 0.0000        | 35   | 0.0120       | 56   | 0.0300        | 63   | chr17:78634237  |
| 0.0294          | 34   | 0.0000        | 37   | 0.0417       | 34   | 0.1304        | 33   | chr19:38052523  |
| 0.0294          | 34   | 0.0000        | 37   | 0.0417       | 34   | 0.1304        | 33   | chr19:38052523  |
| 0.0294          | 34   | 0.0000        | 37   | 0.0417       | 34   | 0.1304        | 33   | chr19:38052523  |
| 0.0200          | 50   | 0.0000        | 37   | 0.0146       | 185  | 0.0400        | 57   | chr7:733813     |
| 0.0571          | 35   | 0.0000        | 38   | 0.0081       | 79   | 0.0588        | 27   | chr10:103805922 |
| 0.0571          | 35   | 0.0000        | 38   | 0.0081       | 79   | 0.0588        | 27   | chr10:103805922 |
| 0.0323          | 31   | 0.0000        | 38   | 0.0128       | 141  | 0.0400        | 31   | chr15:81527110  |
| 0.0323          | 31   | 0.0000        | 38   | 0.0128       | 141  | 0.0400        | 31   | chr15:81527110  |
| 0.1200          | 25   | 0.0000        | 38   | 0.0059       | 88   | 0.0339        | 49   | chr19:1388362   |
| 0.0714          | 28   | 0.0303        | 38   | 0.0645       | 38   | 0.1321        | 50   | chr8:21957128   |
| 0.0220          | 91   | 0.0000        | 40   | 0.0189       | 51   | 0.0758        | 65   | chr16:66255916  |
| 0.0364          | 55   | 0.0000        | 41   | 0.0375       | 67   | 0.0851        | 80   | chr11:1811609   |
| 0.0339          | 59   | 0.0000        | 41   | 0.0467       | 70   | 0.1071        | 59   | chr9:129205140  |
| 0.0526          | 57   | 0.0000        | 42   | 0.1389       | 52   | 0.3333        | 28   | chr19:56583009  |
| 0.0526          | 57   | 0.0000        | 42   | 0.1389       | 52   | 0.3333        | 28   | chr19:56583009  |
| 0.0185          | 54   | 0.0000        | 44   | 0.0286       | 49   | 0.1000        | 39   | chr12:50872051  |
| 0.0185          | 54   | 0.0000        | 44   | 0.0286       | 49   | 0.1000        | 39   | chr12:50872051  |
| 0.0339          | 59   | 0.0000        | 44   | 0.0147       | 72   | 0.0625        | 45   | chr12:54902002  |
| 0.0339          | 59   | 0.0000        | 44   | 0.0290       | 74   | 0.0845        | 67   | chr19:5773817   |
| 0.0189          | 106  | 0.0000        | 44   | 0.0278       | 59   | 0.0909        | 44   | chr1:55236204   |
| 0.0417          | 48   | 0.0000        | 44   | 0.0233       | 42   | 0.0789        | 48   | chr21:43984728  |
| 0.0323          | 31   | 0.0000        | 44   | 0.0148       | 110  | 0.0536        | 74   | chr2:45021540   |
| 0.0211          | 95   | 0.0000        | 45   | 0.0800       | 49   | 0.1818        | 47   | chr11:125645049 |
| 0.0577          | 52   | 0.0000        | 45   | 0.0044       | 146  | 0.0449        | 80   | chr19:19600739  |
| 0.0303          | 33   | 0.0000        | 46   | 0.0098       | 66   | 0.0714        | 27   | chr11:62363552  |
| 0.0606          | 33   | 0.0192        | 46   | 0.0606       | 35   | 0.1538        | 25   | chr3:127358216  |
| 0.0482          | 83   | 0.0000        | 47   | 0.0286       | 49   | 0.0814        | 71   | chr2:128118155  |
| 0.0667          | 45   | 0.0000        | 47   | 0.0106       | 129  | 0.0959        | 69   | chr4:969784     |
| 0.0667          | 45   | 0.0000        | 47   | 0.0106       | 129  | 0.0959        | 69   | chr4:969784     |
| 0.0588          | 51   | 0.0000        | 48   | 0.0625       | 62   | 0.1553        | 81   | chr16:73830059  |
| 0.1154          | 78   | 0.0000        | 48   | 0.0149       | 66   | 0.0645        | 48   | chr16:88604030  |
| 0.0444          | 45   | 0.0000        | 48   | 0.0129       | 98   | 0.0380        | 64   | chr19:1993675   |
| 0.0847          | 59   | 0.0204        | 48   | 0.0390       | 62   | 0.0833        | 30   | chr7:150283848  |
| 0.0847          | 59   | 0.0204        | 48   | 0.0390       | 62   | 0.0833        | 30   | chr7:150283848  |
| 0.0645          | 62   | 0.0000        | 49   | 0.0421       | 82   | 0.0860        | 82   | chr22:16654433  |
| 0.0238          | 84   | 0.0000        | 50   | 0.0139       | 69   | 0.1000        | 49   | chr12:120740759 |
| 0.0385          | 26   | 0.0000        | 50   | 0.0071       | 143  | 0.0588        | 34   | chr16:630849    |
| 0.0814          | 86   | 0.0000        | 50   | 0.0077       | 106  | 0.0748        | 101  | chr16:88510787  |
| 0.0909          | 55   | 0.0000        | 50   | 0.0303       | 48   | 0.2143        | 52   | chr17:59361606  |
| 0.0625          | 32   | 0.0000        | 50   | 0.0035       | 156  | 0.0741        | 26   | chr5:175724107  |
| 0.0625          | 32   | 0.0000        | 50   | 0.0035       | 156  | 0.0741        | 26   | chr5:175724107  |
| 0.0345          | 58   | 0.0000        | 51   | 0.0175       | 63   | 0.0556        | 46   | chr12:54901971  |
| 0.0345          | 58   | 0.0000        | 51   | 0.0175       | 63   | 0.0556        | 46   | chr12:54901971  |
| 0.0345          | 58   | 0.0000        | 51   | 0.0175       | 63   | 0.0556        | 46   | chr12:54901971  |
| 0.0789          | 38   | 0.0000        | 51   | 0.0056       | 115  | 0.1053        | 29   | chr17:7078587   |
| 0.0789          | 38   | 0.0000        | 51   | 0.0056       | 115  | 0.1053        | 29   | chr17:7078587   |
| 0.0233          | 86   | 0.0000        | 51   | 0.0278       | 57   | 0.0641        | 82   | chr3:130760230  |
| 0.0385          | 26   | 0.0000        | 53   | 0.0066       | 169  | 0.0292        | 81   | chr3:185579554  |
| 0.0385          | 26   | 0.0000        | 53   | 0.0066       | 169  | 0.0292        | 81   | chr3:185579554  |
| 0.0385          | 26   | 0.0000        | 53   | 0.0066       | 169  | 0.0292        | 81   | chr3:185579554  |
| 0.0385          | 26   | 0.0000        | 53   | 0.0066       | 169  | 0.0292        | 81   | chr3:185579554  |
| 0.0800          | 25   | 0.0000        | 54   | 0.0155       | 118  | 0.0604        | 81   | chr9:20612514   |
| 0.0800          | 25   | 0.0000        | 54   | 0.0155       | 118  | 0.0604        | 81   | chr9:20612514   |
| 0.1304          | 69   | 0.0000        | 55   | 0.0128       | 75   | 0.1176        | 45   | chr15:38848469  |
| 0.0976          | 41   | 0.0000        | 55   | 0.0252       | 106  | 0.0833        | 40   | chr9:129517745  |
| 0.0606          | 33   | 0.0000        | 56   | 0.0083       | 185  | 0.0227        | 34   | chr4:6961071    |
| 0.0233          | 86   | 0.0000        | 57   | 0.0079       | 175  | 0.0435        | 79   | chr11:65413450  |
| 0.0625          | 32   | 0.0000        | 57   | 0.0056       | 108  | 0.0588        | 64   | chr16:2194450   |
| 0.0625          | 32   | 0.0000        | 57   | 0.0056       | 108  | 0.0588        | 64   | chr16:2194450   |
| 0.0625          | 32   | 0.0000        | 57   | 0.0056       | 108  | 0.0588        | 64   | chr16:2194450   |
| 0.0625          | 32   | 0.0000        | 57   | 0.0056       | 108  | 0.0588        | 64   | chr16:2194450   |
| 0.0625          | 32   | 0.0000        | 57   | 0.0056       | 108  | 0.0588        | 64   | chr16:2194450   |
| 0.0759          | 79   | 0.0000        | 57   | 0.0244       | 67   | 0.0741        | 57   | chr21:44596911  |
| 0.0759          | 79   | 0.0000        | 57   | 0.0244       | 67   | 0.0741        | 57   | chr21:44596911  |
| 0.0625          | 64   | 0.0000        | 57   | 0.0069       | 124  | 0.4286        | 48   | chr4:4279522    |
| 0.0270          | 37   | 0.0000        | 58   | 0.0070       | 83   | 0.0667        | 26   | chr19:48791516  |

|        |     |        |    |        |     |        |     |                 |
|--------|-----|--------|----|--------|-----|--------|-----|-----------------|
| 0.0893 | 56  | 0.0000 | 60 | 0.0156 | 56  | 0.1053 | 34  | chr19:45773629  |
| 0.0893 | 56  | 0.0000 | 60 | 0.0156 | 56  | 0.1053 | 34  | chr19:45773629  |
| 0.0103 | 97  | 0.0000 | 62 | 0.0118 | 95  | 0.0714 | 62  | chr16:19440951  |
| 0.0103 | 97  | 0.0000 | 62 | 0.0118 | 95  | 0.0714 | 62  | chr16:19440951  |
| 0.0465 | 43  | 0.0114 | 62 | 0.0294 | 40  | 0.0714 | 30  | chr1:151966172  |
| 0.0465 | 43  | 0.0114 | 62 | 0.0294 | 40  | 0.0714 | 30  | chr1:151966190  |
| 0.0465 | 43  | 0.0114 | 62 | 0.0294 | 40  | 0.0714 | 30  | chr1:151966190  |
| 0.0465 | 43  | 0.0114 | 62 | 0.0294 | 40  | 0.0714 | 30  | chr1:151966190  |
| 0.0588 | 34  | 0.0000 | 63 | 0.0060 | 100 | 0.0583 | 65  | chr16:2194472   |
| 0.0189 | 53  | 0.0000 | 63 | 0.0068 | 94  | 0.0909 | 33  | chr19:48791330  |
| 0.0400 | 25  | 0.0000 | 63 | 0.0118 | 94  | 0.0357 | 26  | chr2:11211990   |
| 0.0250 | 40  | 0.0000 | 64 | 0.0171 | 100 | 0.0500 | 33  | chr19:51941560  |
| 0.0250 | 40  | 0.0000 | 64 | 0.0171 | 100 | 0.0500 | 33  | chr19:51941560  |
| 0.0323 | 31  | 0.0000 | 64 | 0.0189 | 47  | 0.0556 | 33  | chr19:55062325  |
| 0.0323 | 31  | 0.0000 | 64 | 0.0189 | 47  | 0.0556 | 33  | chr19:55062325  |
| 0.0093 | 107 | 0.0000 | 65 | 0.0244 | 88  | 0.1200 | 73  | chr11:118796859 |
| 0.0429 | 70  | 0.0135 | 67 | 0.0400 | 46  | 0.1111 | 39  | chr19:45774302  |
| 0.0517 | 58  | 0.0000 | 67 | 0.0227 | 56  | 0.0714 | 45  | chr19:54094380  |
| 0.0517 | 58  | 0.0000 | 67 | 0.0227 | 56  | 0.0714 | 45  | chr19:54094380  |
| 0.0128 | 78  | 0.0000 | 69 | 0.0073 | 184 | 0.0159 | 116 | chr19:55524446  |
| 0.0256 | 78  | 0.0000 | 69 | 0.0151 | 164 | 0.0444 | 56  | chr21:27260703  |
| 0.0313 | 160 | 0.0000 | 69 | 0.0291 | 153 | 0.1047 | 113 | chr7:27152306   |
| 0.0208 | 48  | 0.0000 | 70 | 0.0079 | 83  | 0.0313 | 62  | chr2:202948294  |
| 0.0208 | 48  | 0.0000 | 70 | 0.0079 | 83  | 0.0313 | 62  | chr2:202948294  |
| 0.0208 | 48  | 0.0000 | 70 | 0.0079 | 83  | 0.0313 | 62  | chr2:202948294  |
| 0.0789 | 38  | 0.0000 | 71 | 0.0036 | 149 | 0.0909 | 30  | chr17:1412860   |
| 0.0789 | 38  | 0.0000 | 71 | 0.0036 | 149 | 0.0909 | 30  | chr17:1412860   |
| 0.0789 | 38  | 0.0000 | 71 | 0.0036 | 149 | 0.0909 | 30  | chr17:1412860   |
| 0.0698 | 43  | 0.0116 | 71 | 0.0263 | 56  | 0.0588 | 35  | chr19:55012357  |
| 0.0698 | 43  | 0.0116 | 71 | 0.0263 | 56  | 0.0588 | 35  | chr19:55012357  |
| 0.0213 | 47  | 0.0000 | 72 | 0.0050 | 126 | 0.0930 | 51  | chr17:71648240  |
| 0.0649 | 77  | 0.0000 | 72 | 0.0333 | 55  | 0.1176 | 42  | chr19:45773976  |
| 0.0342 | 117 | 0.0000 | 73 | 0.0053 | 153 | 0.0327 | 131 | chr19:1221259   |
| 0.0230 | 87  | 0.0000 | 74 | 0.0123 | 124 | 0.1071 | 58  | chr17:18102780  |
| 0.0230 | 87  | 0.0000 | 74 | 0.0123 | 124 | 0.1071 | 58  | chr17:18102780  |
| 0.0323 | 31  | 0.0080 | 74 | 0.0179 | 65  | 0.0627 | 157 | chr19:43570508  |
| 0.0323 | 31  | 0.0080 | 74 | 0.0179 | 65  | 0.0627 | 157 | chr19:43570508  |
| 0.0286 | 35  | 0.0000 | 74 | 0.0213 | 40  | 0.0714 | 28  | chr19:50517974  |
| 0.0667 | 45  | 0.0000 | 74 | 0.0034 | 164 | 0.0566 | 51  | chr1:2451544    |
| 0.0645 | 31  | 0.0000 | 75 | 0.0083 | 70  | 0.0608 | 142 | chr19:7650706   |
| 0.0238 | 42  | 0.0000 | 75 | 0.0125 | 155 | 0.0897 | 54  | chr3:198241083  |
| 0.0238 | 42  | 0.0000 | 75 | 0.0125 | 155 | 0.0897 | 54  | chr3:198241083  |
| 0.0667 | 45  | 0.0082 | 76 | 0.0263 | 60  | 0.0741 | 37  | chr22:22423279  |
| 0.0806 | 62  | 0.0000 | 77 | 0.0050 | 228 | 0.0116 | 163 | chr20:62151423  |
| 0.0217 | 92  | 0.0000 | 78 | 0.0073 | 177 | 0.0152 | 68  | chr11:32413663  |
| 0.0217 | 92  | 0.0000 | 78 | 0.0073 | 177 | 0.0152 | 68  | chr11:32413663  |
| 0.0217 | 92  | 0.0000 | 78 | 0.0073 | 177 | 0.0152 | 68  | chr11:32413663  |
| 0.0217 | 92  | 0.0000 | 78 | 0.0073 | 177 | 0.0152 | 68  | chr11:32413663  |
| 0.0217 | 92  | 0.0000 | 78 | 0.0073 | 177 | 0.0152 | 68  | chr11:32413663  |
| 0.0690 | 58  | 0.0213 | 78 | 0.0441 | 91  | 0.1053 | 39  | chr16:3008189   |
| 0.0625 | 80  | 0.0156 | 79 | 0.0253 | 92  | 0.0870 | 66  | chr1:3596095    |
| 0.0625 | 80  | 0.0156 | 79 | 0.0253 | 92  | 0.0870 | 66  | chr1:3596095    |
| 0.0625 | 80  | 0.0156 | 79 | 0.0253 | 92  | 0.0870 | 66  | chr1:3596095    |
| 0.0091 | 110 | 0.0000 | 79 | 0.0143 | 78  | 0.0370 | 56  | chr1:153412693  |
| 0.0091 | 110 | 0.0000 | 79 | 0.0143 | 78  | 0.0370 | 56  | chr1:153412693  |
| 0.0091 | 110 | 0.0000 | 79 | 0.0143 | 78  | 0.0370 | 56  | chr1:153412693  |
| 0.0250 | 40  | 0.0000 | 80 | 0.0085 | 79  | 0.0345 | 48  | chr16:30569204  |
| 0.0606 | 33  | 0.0000 | 82 | 0.0091 | 61  | 0.0608 | 142 | chr19:7650760   |
| 0.0606 | 33  | 0.0000 | 82 | 0.0091 | 61  | 0.0608 | 142 | chr19:7650760   |
| 0.0400 | 25  | 0.0000 | 83 | 0.0028 | 176 | 0.0129 | 107 | chr16:88313893  |
| 0.0400 | 25  | 0.0000 | 83 | 0.0028 | 176 | 0.0129 | 107 | chr16:88313893  |
| 0.0400 | 25  | 0.0000 | 83 | 0.0028 | 176 | 0.0129 | 107 | chr16:88313893  |
| 0.0400 | 25  | 0.0000 | 83 | 0.0028 | 176 | 0.0129 | 107 | chr16:88313893  |
| 0.0308 | 65  | 0.0000 | 83 | 0.0056 | 102 | 0.0588 | 34  | chr1:3763657    |
| 0.0308 | 65  | 0.0000 | 83 | 0.0056 | 102 | 0.0588 | 34  | chr1:3763657    |
| 0.0455 | 44  | 0.0000 | 84 | 0.0033 | 153 | 0.0213 | 41  | chr17:26741767  |
| 0.0370 | 27  | 0.0080 | 84 | 0.0128 | 134 | 0.0690 | 30  | chr19:5671463   |
| 0.0385 | 52  | 0.0093 | 84 | 0.0287 | 126 | 0.1176 | 87  | chr19:17978976  |
| 0.0071 | 141 | 0.0000 | 85 | 0.0227 | 89  | 0.0667 | 87  | chr15:43192815  |
| 0.0071 | 141 | 0.0000 | 85 | 0.0227 | 89  | 0.0667 | 87  | chr15:43192815  |
| 0.0233 | 86  | 0.0000 | 87 | 0.0090 | 139 | 0.0182 | 69  | chr11:128068198 |
| 0.0233 | 86  | 0.0000 | 87 | 0.0090 | 139 | 0.0182 | 69  | chr11:128068198 |
| 0.0215 | 93  | 0.0000 | 87 | 0.0056 | 144 | 0.0182 | 73  | chr12:101874581 |
| 0.0286 | 70  | 0.0115 | 87 | 0.0244 | 59  | 0.0667 | 105 | chr16:620012    |
| 0.0328 | 61  | 0.0064 | 87 | 0.0112 | 125 | 0.0909 | 30  | chr16:2767298   |
| 0.0328 | 61  | 0.0064 | 87 | 0.0112 | 125 | 0.0909 | 30  | chr16:2767298   |
| 0.0851 | 47  | 0.0177 | 87 | 0.0316 | 72  | 0.0690 | 30  | chr16:87764663  |
| 0.0851 | 47  | 0.0177 | 87 | 0.0316 | 72  | 0.0690 | 30  | chr16:87764663  |
| 0.0656 | 61  | 0.0094 | 87 | 0.0249 | 155 | 0.0645 | 41  | chr7:44152238   |
| 0.0667 | 60  | 0.0093 | 88 | 0.0254 | 153 | 0.0556 | 43  | chr7:44152253   |
| 0.0137 | 146 | 0.0000 | 88 | 0.0058 | 146 | 0.1081 | 106 | chr8:70908179   |
| 0.0732 | 41  | 0.0000 | 89 | 0.0042 | 135 | 0.0112 | 68  | chr19:50372842  |
| 0.0140 | 143 | 0.0000 | 89 | 0.0441 | 117 | 0.1250 | 86  | chr5:141040593  |
| 0.0130 | 154 | 0.0000 | 89 | 0.0400 | 72  | 0.1395 | 84  | chr5:176875428  |
| 0.0189 | 53  | 0.0000 | 90 | 0.0220 | 71  | 0.0882 | 47  | chr17:18102595  |
| 0.0566 | 53  | 0.0068 | 90 | 0.0117 | 134 | 0.0417 | 40  | chr18:55091605  |
| 0.0566 | 53  | 0.0068 | 90 | 0.0117 | 134 | 0.0417 | 40  | chr18:55091605  |
| 0.1200 | 25  | 0.0000 | 91 | 0.0070 | 147 | 0.0417 | 32  | chr5:179712921  |
| 0.0357 | 28  | 0.0000 | 92 | 0.0092 | 71  | 0.0244 | 33  | chr16:4792455   |
| 0.0444 | 45  | 0.0000 | 93 | 0.0150 | 76  | 0.0370 | 25  | chr16:2872318   |
| 0.0290 | 69  | 0.0000 | 94 | 0.0045 | 126 | 0.0300 | 74  | chr11:549957    |
| 0.0087 | 115 | 0.0000 | 94 | 0.0769 | 64  | 0.1667 | 56  | chr15:41449550  |
| 0.0087 | 115 | 0.0000 | 94 | 0.0769 | 64  | 0.1667 | 56  | chr15:41449550  |
| 0.0087 | 115 | 0.0000 | 94 | 0.0769 | 64  | 0.1667 | 56  | chr15:41449550  |
| 0.0087 | 115 | 0.0000 | 94 | 0.0769 | 64  | 0.1667 | 56  | chr15:41449550  |
| 0.0909 | 44  | 0.0070 | 94 | 0.0212 | 145 | 0.0465 | 34  | chr9:139152429  |

|        |     |        |     |        |     |        |     |                 |
|--------|-----|--------|-----|--------|-----|--------|-----|-----------------|
| 0.0909 | 44  | 0.0070 | 94  | 0.0212 | 145 | 0.0465 | 34  | chr9:139152429  |
| 0.0909 | 44  | 0.0070 | 94  | 0.0212 | 145 | 0.0465 | 34  | chr9:139152429  |
| 0.0909 | 44  | 0.0070 | 94  | 0.0212 | 145 | 0.0465 | 34  | chr9:139152429  |
| 0.0909 | 44  | 0.0070 | 94  | 0.0212 | 145 | 0.0465 | 34  | chr9:139152429  |
| 0.0652 | 46  | 0.0000 | 95  | 0.0127 | 56  | 0.1000 | 28  | chr12:8075625   |
| 0.0652 | 46  | 0.0000 | 95  | 0.0127 | 56  | 0.1000 | 28  | chr12:8075625   |
| 0.0270 | 37  | 0.0068 | 95  | 0.0192 | 97  | 0.0517 | 41  | chr16:2194742   |
| 0.0270 | 37  | 0.0068 | 95  | 0.0192 | 97  | 0.0517 | 41  | chr16:2194742   |
| 0.0417 | 48  | 0.0064 | 95  | 0.0139 | 110 | 0.0800 | 48  | chr17:4656377   |
| 0.0417 | 48  | 0.0064 | 95  | 0.0139 | 110 | 0.0800 | 48  | chr17:4656377   |
| 0.0110 | 91  | 0.0000 | 95  | 0.0058 | 223 | 0.0417 | 158 | chr19:539892    |
| 0.0323 | 124 | 0.0000 | 95  | 0.0089 | 125 | 0.0270 | 87  | chr6:10527783   |
| 0.0345 | 29  | 0.0121 | 96  | 0.0211 | 68  | 0.0423 | 53  | chr10:134606054 |
| 0.0345 | 29  | 0.0121 | 96  | 0.0211 | 68  | 0.0423 | 53  | chr10:134606054 |
| 0.0400 | 75  | 0.0182 | 96  | 0.0476 | 73  | 0.1429 | 50  | chr2:27158968   |
| 0.0656 | 61  | 0.0000 | 96  | 0.0143 | 199 | 0.1053 | 45  | chr2:233926891  |
| 0.0606 | 33  | 0.0051 | 98  | 0.0185 | 84  | 0.0789 | 30  | chr16:88250710  |
| 0.0714 | 28  | 0.0000 | 98  | 0.0189 | 58  | 0.0787 | 64  | chr17:7405042   |
| 0.0244 | 82  | 0.0000 | 99  | 0.0074 | 175 | 0.0212 | 139 | chr20:22978301  |
| 0.0057 | 176 | 0.0000 | 99  | 0.0093 | 208 | 0.0684 | 155 | chr22:49049005  |
| 0.0056 | 179 | 0.0000 | 99  | 0.0163 | 154 | 0.0330 | 137 | chr4:5762176    |
| 0.0143 | 140 | 0.0000 | 99  | 0.0188 | 137 | 0.1000 | 99  | chr8:70907958   |
| 0.0093 | 108 | 0.0000 | 100 | 0.0432 | 130 | 0.1270 | 85  | chr11:75595222  |
| 0.0625 | 32  | 0.0000 | 100 | 0.0103 | 175 | 0.0217 | 33  | chr18:490685    |
| 0.0333 | 30  | 0.0054 | 100 | 0.0114 | 139 | 0.0247 | 59  | chr20:60228707  |
| 0.0333 | 30  | 0.0054 | 100 | 0.0114 | 139 | 0.0247 | 59  | chr20:60228707  |
| 0.0333 | 30  | 0.0054 | 100 | 0.0114 | 139 | 0.0247 | 59  | chr20:60228707  |
| 0.0333 | 30  | 0.0054 | 100 | 0.0114 | 139 | 0.0247 | 59  | chr20:60228707  |
| 0.0625 | 48  | 0.0000 | 101 | 0.0109 | 61  | 0.1081 | 33  | chr11:8058484   |
| 0.0769 | 26  | 0.0062 | 101 | 0.0205 | 89  | 0.0469 | 41  | chr11:66914998  |
| 0.0250 | 40  | 0.0057 | 101 | 0.0107 | 200 | 0.0370 | 29  | chr19:4861019   |
| 0.1143 | 35  | 0.0000 | 101 | 0.0063 | 147 | 0.0222 | 33  | chr20:60743241  |
| 0.1023 | 88  | 0.0000 | 101 | 0.0095 | 163 | 0.1000 | 79  | chr7:1510544    |
| 0.1023 | 88  | 0.0000 | 101 | 0.0095 | 163 | 0.1000 | 79  | chr7:1510544    |
| 0.0392 | 51  | 0.0123 | 102 | 0.0248 | 136 | 0.0968 | 39  | chr9:139068326  |
| 0.0392 | 51  | 0.0123 | 102 | 0.0248 | 136 | 0.0968 | 39  | chr9:139068326  |
| 0.0244 | 41  | 0.0093 | 103 | 0.0166 | 267 | 0.0390 | 59  | chr11:1366704   |
| 0.0244 | 41  | 0.0093 | 103 | 0.0166 | 267 | 0.0390 | 59  | chr11:1366704   |
| 0.0244 | 41  | 0.0093 | 103 | 0.0166 | 267 | 0.0390 | 59  | chr11:1366704   |
| 0.0244 | 41  | 0.0093 | 103 | 0.0166 | 267 | 0.0390 | 59  | chr11:1366704   |
| 0.0227 | 44  | 0.0000 | 103 | 0.0080 | 167 | 0.0301 | 105 | chr2:10359490   |
| 0.0227 | 44  | 0.0000 | 103 | 0.0080 | 167 | 0.0301 | 105 | chr2:10359490   |
| 0.0185 | 162 | 0.0000 | 105 | 0.0333 | 99  | 0.0813 | 151 | chr17:73634634  |
| 0.0313 | 32  | 0.0000 | 106 | 0.0247 | 49  | 0.0610 | 50  | chr19:60845797  |
| 0.0303 | 33  | 0.0000 | 106 | 0.0385 | 33  | 0.1077 | 50  | chr9:129536664  |
| 0.0426 | 47  | 0.0047 | 107 | 0.0221 | 82  | 0.0909 | 33  | chr16:88250779  |
| 0.0233 | 86  | 0.0000 | 109 | 0.0086 | 159 | 0.0571 | 70  | chr19:50373394  |
| 0.0103 | 97  | 0.0000 | 109 | 0.0179 | 70  | 0.0769 | 66  | chr19:60588529  |
| 0.0476 | 42  | 0.0192 | 110 | 0.0309 | 106 | 0.0811 | 60  | chr7:718659     |
| 0.0560 | 125 | 0.0084 | 110 | 0.0149 | 85  | 0.0400 | 66  | chr9:135283855  |
| 0.0455 | 44  | 0.0000 | 111 | 0.0139 | 59  | 0.1429 | 50  | chr17:2153563   |
| 0.0741 | 27  | 0.0000 | 111 | 0.0091 | 158 | 0.0685 | 62  | chr8:145714008  |
| 0.0123 | 81  | 0.0000 | 113 | 0.0143 | 223 | 0.1250 | 43  | chr2:100802044  |
| 0.0231 | 173 | 0.0000 | 114 | 0.0238 | 123 | 0.1176 | 114 | chr6:34963797   |
| 0.0588 | 34  | 0.0049 | 115 | 0.0154 | 100 | 0.0488 | 37  | chr16:87450875  |
| 0.0588 | 34  | 0.0049 | 115 | 0.0154 | 100 | 0.0488 | 37  | chr16:87450875  |
| 0.0588 | 34  | 0.0049 | 115 | 0.0154 | 100 | 0.0488 | 37  | chr16:87450875  |
| 0.0588 | 34  | 0.0049 | 115 | 0.0154 | 100 | 0.0488 | 37  | chr16:87450875  |
| 0.0127 | 79  | 0.0059 | 116 | 0.0357 | 79  | 1.0000 | 34  | chr13:26231964  |
| 0.0769 | 78  | 0.0000 | 116 | 0.0053 | 120 | 0.0323 | 50  | chr16:87405843  |
| 0.0769 | 78  | 0.0000 | 116 | 0.0053 | 120 | 0.0323 | 50  | chr16:87405843  |
| 0.0364 | 55  | 0.0053 | 117 | 0.0280 | 79  | 0.0882 | 46  | chr16:29818647  |
| 0.0152 | 66  | 0.0068 | 117 | 0.0333 | 78  | 0.0769 | 42  | chr19:40740589  |
| 0.0208 | 48  | 0.0060 | 118 | 0.0122 | 98  | 0.0357 | 41  | chr19:1441164   |
| 0.0882 | 34  | 0.0099 | 121 | 0.0488 | 42  | 0.2000 | 25  | chr19:63589447  |
| 0.0882 | 34  | 0.0099 | 121 | 0.0476 | 42  | 0.2222 | 25  | chr19:63589467  |
| 0.0097 | 103 | 0.0000 | 121 | 0.0075 | 189 | 0.0255 | 133 | chr20:22978141  |
| 0.0238 | 42  | 0.0052 | 123 | 0.0085 | 147 | 0.0263 | 42  | chr5:577447     |
| 0.0169 | 59  | 0.0061 | 123 | 0.0168 | 132 | 0.1875 | 53  | chr9:139565129  |
| 0.1000 | 50  | 0.0050 | 124 | 0.0126 | 147 | 0.0667 | 39  | chr2:232499203  |
| 0.0244 | 82  | 0.0000 | 125 | 0.0048 | 152 | 0.1111 | 67  | chr11:47164534  |
| 0.0244 | 82  | 0.0000 | 125 | 0.0048 | 152 | 0.1111 | 67  | chr11:47164534  |
| 0.1200 | 25  | 0.0119 | 125 | 0.0223 | 99  | 0.1304 | 28  | chr9:135140451  |
| 0.1200 | 25  | 0.0119 | 125 | 0.0223 | 99  | 0.1304 | 28  | chr9:135140451  |
| 0.1200 | 25  | 0.0119 | 125 | 0.0223 | 99  | 0.1304 | 28  | chr9:135140451  |
| 0.0159 | 126 | 0.0000 | 126 | 0.0160 | 168 | 0.0727 | 113 | chr1:50661729   |
| 0.0244 | 82  | 0.0000 | 127 | 0.0181 | 154 | 0.0513 | 85  | chr16:638363    |
| 0.0244 | 82  | 0.0000 | 127 | 0.0181 | 154 | 0.0513 | 85  | chr16:638363    |
| 0.0244 | 82  | 0.0000 | 127 | 0.0181 | 154 | 0.0513 | 85  | chr16:638363    |
| 0.0408 | 98  | 0.0000 | 129 | 0.0088 | 165 | 0.0526 | 65  | chr11:65442303  |
| 0.0141 | 71  | 0.0053 | 129 | 0.0172 | 60  | 0.0690 | 51  | chr14:74815098  |
| 0.0192 | 52  | 0.0000 | 130 | 0.0104 | 179 | 0.0541 | 67  | chr11:72696316  |
| 0.0364 | 55  | 0.0000 | 130 | 0.0062 | 192 | 0.0488 | 45  | chr22:48980534  |
| 0.0465 | 86  | 0.0059 | 131 | 0.0122 | 135 | 0.0704 | 82  | chr11:617173    |
| 0.0667 | 30  | 0.0094 | 131 | 0.0181 | 135 | 0.0465 | 36  | chr8:144887902  |
| 0.0612 | 49  | 0.0050 | 132 | 0.0274 | 61  | 0.1000 | 38  | chr16:30680130  |
| 0.0612 | 49  | 0.0050 | 132 | 0.0274 | 61  | 0.1000 | 38  | chr16:30680130  |
| 0.0612 | 49  | 0.0050 | 132 | 0.0274 | 61  | 0.1000 | 38  | chr16:30680130  |
| 0.0612 | 49  | 0.0049 | 132 | 0.0290 | 61  | 0.0833 | 39  | chr16:30680143  |
| 0.0102 | 197 | 0.0000 | 134 | 0.0040 | 240 | 0.0283 | 162 | chr2:14690554   |
| 0.0200 | 50  | 0.0051 | 135 | 0.0207 | 131 | 0.0526 | 41  | chr8:143482444  |
| 0.0200 | 50  | 0.0051 | 135 | 0.0207 | 131 | 0.0526 | 41  | chr8:143482444  |
| 0.0196 | 51  | 0.0042 | 139 | 0.0180 | 128 | 0.0385 | 35  | chr17:2186555   |
| 0.0196 | 51  | 0.0042 | 139 | 0.0180 | 128 | 0.0385 | 35  | chr17:2186555   |
| 0.0192 | 52  | 0.0000 | 139 | 0.0043 | 159 | 0.2000 | 35  | chr7:19123469   |

|        |     |        |     |        |     |        |     |                 |
|--------|-----|--------|-----|--------|-----|--------|-----|-----------------|
| 0.0342 | 146 | 0.0104 | 142 | 0.0556 | 85  | 0.1333 | 85  | chr11:64878855  |
| 0.0210 | 143 | 0.0054 | 143 | 0.0244 | 83  | 0.0625 | 77  | chr17:58111550  |
| 0.0248 | 121 | 0.0075 | 144 | 0.0202 | 165 | 0.0679 | 147 | chr16:3036416   |
| 0.0349 | 86  | 0.0041 | 144 | 0.0385 | 77  | 0.1143 | 61  | chr22:49332327  |
| 0.0568 | 88  | 0.0000 | 145 | 0.0051 | 134 | 0.1099 | 93  | chr6:36915198   |
| 0.0566 | 106 | 0.0000 | 146 | 0.0064 | 121 | 0.1481 | 76  | chr17:77602939  |
| 0.0690 | 29  | 0.0080 | 147 | 0.0168 | 74  | 0.0513 | 28  | chr19:41296727  |
| 0.0055 | 183 | 0.0000 | 148 | 0.0154 | 123 | 0.1429 | 105 | chr17:959074    |
| 0.0055 | 183 | 0.0000 | 148 | 0.0154 | 123 | 0.1429 | 105 | chr19:47079285  |
| 0.0278 | 72  | 0.0047 | 149 | 0.0112 | 140 | 0.0278 | 53  | chr19:47079285  |
| 0.0278 | 72  | 0.0047 | 149 | 0.0112 | 140 | 0.0278 | 53  | chr16:626348    |
| 0.0278 | 72  | 0.0047 | 149 | 0.0112 | 140 | 0.0278 | 53  | chr16:626348    |
| 0.0278 | 72  | 0.0047 | 149 | 0.0112 | 140 | 0.0278 | 53  | chr16:626348    |
| 0.0278 | 72  | 0.0047 | 149 | 0.0112 | 140 | 0.0278 | 53  | chr16:626348    |
| 0.0296 | 135 | 0.0000 | 150 | 0.0441 | 99  | 0.1176 | 72  | chr16:626348    |
| 0.0392 | 102 | 0.0106 | 150 | 0.0161 | 154 | 0.1176 | 72  | chr19:18196303  |
| 0.0050 | 201 | 0.0000 | 152 | 0.0066 | 177 | 0.0357 | 55  | chr4:7095165    |
| 0.0149 | 67  | 0.0000 | 154 | 0.0069 | 110 | 0.0213 | 121 | chr14:74814283  |
| 0.0357 | 56  | 0.0000 | 155 | 0.0162 | 142 | 0.0526 | 72  | chr17:7194931   |
| 0.0632 | 95  | 0.0093 | 155 | 0.0198 | 98  | 0.0625 | 49  | chr11:2907226   |
| 0.0632 | 95  | 0.0093 | 155 | 0.0198 | 98  | 0.1098 | 84  | chr19:2046867   |
| 0.0732 | 41  | 0.0000 | 155 | 0.0065 | 99  | 0.1098 | 84  | chr19:2046867   |
| 0.0732 | 41  | 0.0000 | 155 | 0.0065 | 99  | 0.0303 | 34  | chr1:229539304  |
| 0.0732 | 41  | 0.0000 | 155 | 0.0065 | 99  | 0.0303 | 34  | chr1:229539304  |
| 0.0625 | 64  | 0.0000 | 156 | 0.0053 | 124 | 0.0303 | 34  | chr1:229539304  |
| 0.0263 | 38  | 0.0000 | 157 | 0.0385 | 27  | 0.0135 | 64  | chr1:53565659   |
| 0.0167 | 299 | 0.0000 | 157 | 0.0278 | 159 | 0.0833 | 30  | chr17:4589085   |
| 0.0306 | 98  | 0.0000 | 157 | 0.0127 | 159 | 0.0714 | 168 | chr2:238737972  |
| 0.0164 | 61  | 0.0081 | 158 | 0.0179 | 66  | 0.0323 | 55  | chr8:145661545  |
| 0.0659 | 91  | 0.0139 | 158 | 0.0280 | 116 | 0.0476 | 43  | chr11:65781593  |
| 0.1023 | 88  | 0.0045 | 159 | 0.0157 | 150 | 0.0851 | 72  | chr19:2047269   |
| 0.0194 | 103 | 0.0050 | 159 | 0.0212 | 272 | 0.0333 | 87  | chr16:549422    |
| 0.0194 | 103 | 0.0050 | 159 | 0.0212 | 272 | 0.0522 | 109 | chr16:88168676  |
| 0.0185 | 54  | 0.0000 | 159 | 0.0041 | 146 | 0.0522 | 109 | chr16:88168676  |
| 0.0185 | 54  | 0.0000 | 159 | 0.0041 | 146 | 0.0465 | 63  | chr4:3263552    |
| 0.1000 | 100 | 0.0052 | 160 | 0.0041 | 146 | 0.0465 | 63  | chr4:3263552    |
| 0.0611 | 131 | 0.0057 | 160 | 0.0159 | 92  | 0.0417 | 72  | chr14:104522660 |
| 0.0220 | 91  | 0.0047 | 162 | 0.0155 | 172 | 0.1020 | 87  | chr8:10625432   |
| 0.0076 | 131 | 0.0000 | 162 | 0.0081 | 116 | 0.0260 | 92  | chr1:163591641  |
| 0.0233 | 43  | 0.0079 | 162 | 0.0070 | 136 | 0.0769 | 78  | chr5:172687330  |
| 0.0600 | 100 | 0.0082 | 164 | 0.0326 | 75  | 0.2143 | 44  | chr9:139565354  |
| 0.0600 | 100 | 0.0082 | 164 | 0.0137 | 163 | 0.0357 | 107 | chr16:778384    |
| 0.0600 | 100 | 0.0082 | 164 | 0.0137 | 163 | 0.0357 | 107 | chr16:778384    |
| 0.0288 | 104 | 0.0041 | 167 | 0.0137 | 163 | 0.0357 | 107 | chr16:778384    |
| 0.0173 | 173 | 0.0063 | 167 | 0.0089 | 121 | 0.0779 | 97  | chr11:550779    |
| 0.0273 | 110 | 0.0127 | 168 | 0.0110 | 174 | 0.0256 | 103 | chr7:126679664  |
| 0.0110 | 273 | 0.0000 | 172 | 0.0435 | 105 | 0.1071 | 66  | chr11:63440892  |
| 0.0110 | 273 | 0.0000 | 172 | 0.0056 | 314 | 0.0252 | 180 | chr18:75255759  |
| 0.0110 | 273 | 0.0000 | 172 | 0.0056 | 314 | 0.0252 | 180 | chr18:75255759  |
| 0.0110 | 273 | 0.0000 | 172 | 0.0056 | 314 | 0.0252 | 180 | chr18:75255759  |
| 0.0571 | 35  | 0.0034 | 172 | 0.0131 | 128 | 0.0303 | 91  | chr1:37272431   |
| 0.0571 | 35  | 0.0034 | 172 | 0.0131 | 128 | 0.0303 | 91  | chr1:37272431   |
| 0.0250 | 80  | 0.0039 | 176 | 0.0131 | 128 | 0.0303 | 91  | chr1:37272431   |
| 0.0328 | 61  | 0.0000 | 177 | 0.0087 | 101 | 0.0882 | 91  | chr17:76623096  |
| 0.0095 | 105 | 0.0041 | 177 | 0.0191 | 130 | 0.0612 | 54  | chr11:2907170   |
| 0.0286 | 140 | 0.0108 | 177 | 0.0069 | 131 | 0.2222 | 48  | chr11:34335378  |
| 0.0313 | 64  | 0.0122 | 178 | 0.0216 | 175 | 0.1000 | 74  | chr16:579107    |
| 0.0313 | 288 | 0.0000 | 179 | 0.0184 | 107 | 0.0448 | 73  | chr4:7095629    |
| 0.0556 | 72  | 0.0033 | 184 | 0.0254 | 323 | 0.0784 | 186 | chr19:59666706  |
| 0.0556 | 72  | 0.0033 | 184 | 0.0069 | 264 | 0.0245 | 119 | chr4:1232908    |
| 0.0093 | 216 | 0.0000 | 184 | 0.0069 | 264 | 0.0245 | 119 | chr4:1232908    |
| 0.0093 | 216 | 0.0000 | 184 | 0.0046 | 201 | 0.0187 | 158 | chr7:100331477  |
| 0.0093 | 216 | 0.0000 | 184 | 0.0046 | 201 | 0.0187 | 158 | chr7:100331477  |
| 0.0093 | 216 | 0.0000 | 184 | 0.0046 | 201 | 0.0187 | 158 | chr7:100331477  |
| 0.0565 | 124 | 0.0042 | 185 | 0.0046 | 201 | 0.0187 | 158 | chr7:100331477  |
| 0.0565 | 124 | 0.0042 | 185 | 0.0179 | 159 | 0.0400 | 96  | chr16:777622    |
| 0.0565 | 124 | 0.0042 | 185 | 0.0179 | 159 | 0.0400 | 96  | chr16:777622    |
| 0.0565 | 124 | 0.0042 | 185 | 0.0179 | 159 | 0.0400 | 96  | chr16:777622    |
| 0.0293 | 205 | 0.0066 | 185 | 0.0179 | 159 | 0.0400 | 96  | chr16:777622    |
| 0.0167 | 60  | 0.0031 | 188 | 0.0789 | 125 | 0.3333 | 109 | chr18:3001945   |
| 0.0690 | 29  | 0.0000 | 188 | 0.0455 | 55  | 0.3333 | 26  | chr11:63815674  |
| 0.0042 | 236 | 0.0000 | 188 | 0.0128 | 194 | 0.0521 | 70  | chr16:4106187   |
| 0.0385 | 26  | 0.0067 | 189 | 0.0063 | 186 | 0.0164 | 169 | chr3:129689454  |
| 0.0079 | 253 | 0.0000 | 189 | 0.0221 | 130 | 0.0588 | 68  | chr11:74818881  |
| 0.0029 | 339 | 0.0000 | 190 | 0.0250 | 168 | 0.0571 | 142 | chr19:50373335  |
| 0.0078 | 256 | 0.0000 | 191 | 0.0723 | 201 | 0.2000 | 155 | chr15:71830869  |
| 0.0087 | 230 | 0.0000 | 192 | 0.0260 | 169 | 0.0571 | 144 | chr19:50373325  |
| 0.0101 | 99  | 0.0000 | 193 | 0.0408 | 164 | 0.1250 | 118 | chr11:65442261  |
| 0.0980 | 51  | 0.0079 | 200 | 0.0068 | 194 | 0.0316 | 99  | chr2:236741391  |
| 0.0032 | 308 | 0.0000 | 200 | 0.0186 | 104 | 0.1212 | 36  | chr12:122201238 |
| 0.0299 | 67  | 0.0028 | 202 | 0.0435 | 198 | 0.0909 | 159 | chr6:109882346  |
| 0.0125 | 321 | 0.0000 | 205 | 0.0417 | 84  | 0.1429 | 48  | chr10:80672430  |
| 0.0260 | 77  | 0.0031 | 206 | 0.0189 | 180 | 0.0400 | 169 | chr11:62251527  |
| 0.0345 | 87  | 0.0089 | 208 | 0.0526 | 63  | 0.1538 | 49  | chr2:10505357   |
| 0.0194 | 206 | 0.0000 | 209 | 0.0175 | 118 | 0.0678 | 81  | chr12:131193945 |
| 0.0274 | 73  | 0.0000 | 210 | 0.0145 | 143 | 0.0333 | 128 | chr11:62251159  |
| 0.0274 | 73  | 0.0000 | 210 | 0.0112 | 80  | 0.0294 | 70  | chr8:144969537  |
| 0.0076 | 131 | 0.0035 | 211 | 0.0112 | 80  | 0.0294 | 70  | chr8:144969537  |
| 0.0076 | 131 | 0.0035 | 211 | 0.0147 | 129 | 0.0690 | 97  | chr14:105027748 |
| 0.0076 | 131 | 0.0035 | 211 | 0.0147 | 129 | 0.0690 | 97  | chr14:105027748 |
| 0.0076 | 131 | 0.0035 | 211 | 0.0147 | 129 | 0.0690 | 97  | chr14:105027748 |
| 0.0104 | 289 | 0.0000 | 213 | 0.0147 | 129 | 0.0690 | 97  | chr14:105027748 |
| 0.0194 | 103 | 0.0000 | 213 | 0.0726 | 211 | 0.2857 | 142 | chr8:29262241   |
| 0.0769 | 26  | 0.0078 | 216 | 0.0087 | 179 | 0.0526 | 75  | chr9:137938826  |
| 0.0182 | 165 | 0.0040 | 216 | 0.0149 | 44  | 0.1000 | 26  | chr13:113286713 |
| 0.0182 | 165 | 0.0040 | 216 | 0.0115 | 130 | 0.0455 | 91  | chr9:137531582  |
| 0.0426 | 235 | 0.0000 | 218 | 0.0115 | 130 | 0.0455 | 91  | chr9:137531582  |
|        |     |        |     | 0.0040 | 250 | 0.0278 | 140 | chr16:2958342   |

|        |     |        |     |        |     |        |     |                 |
|--------|-----|--------|-----|--------|-----|--------|-----|-----------------|
| 0.0426 | 235 | 0.0000 | 218 | 0.0040 | 250 | 0.0278 | 140 | chr16:2958347   |
| 0.0442 | 113 | 0.0031 | 223 | 0.0079 | 226 | 0.0263 | 55  | chr10:725606    |
| 0.0314 | 159 | 0.0077 | 225 | 0.0286 | 101 | 0.1515 | 105 | chr16:30577743  |
| 0.0071 | 280 | 0.0000 | 229 | 0.0108 | 265 | 0.0244 | 179 | chr6:108986718  |
| 0.0071 | 280 | 0.0000 | 229 | 0.0108 | 265 | 0.0244 | 179 | chr6:108986718  |
| 0.0500 | 80  | 0.0089 | 234 | 0.0182 | 75  | 0.0671 | 275 | chr14:102045325 |
| 0.0161 | 62  | 0.0026 | 238 | 0.0076 | 109 | 0.0204 | 58  | chr16:57054705  |
| 0.0198 | 101 | 0.0047 | 240 | 0.0286 | 103 | 0.1250 | 37  | chr16:1816225   |
| 0.0192 | 104 | 0.0047 | 243 | 0.0286 | 106 | 0.1250 | 40  | chr16:1816230   |
| 0.0192 | 104 | 0.0047 | 243 | 0.0286 | 106 | 0.1250 | 40  | chr16:1816230   |
| 0.0071 | 141 | 0.0031 | 244 | 0.0088 | 205 | 0.0769 | 80  | chr8:140784481  |
| 0.0071 | 141 | 0.0031 | 244 | 0.0088 | 205 | 0.0769 | 80  | chr8:140784481  |
| 0.0198 | 202 | 0.0000 | 250 | 0.0060 | 270 | 0.0313 | 160 | chr16:970808    |
| 0.0160 | 125 | 0.0069 | 301 | 0.0179 | 196 | 0.0700 | 113 | chr17:77649395  |
| 0.0132 | 228 | 0.0000 | 307 | 0.0122 | 152 | 0.0625 | 128 | chr10:133970706 |

**Table S3.5**

**List of promoters presenting a methylation profile matching that of GC skew promoters.**

Cov. = Coverage = N1+N2+M1+M2 (see Figure S3.3). M<sub>s</sub> (-2000;-1000): 1kb windows starting 2kb upstream of TSS. M<sub>s</sub> (-1000;TSS): 1kb windows ending at TSS. M<sub>s</sub> (TSS;1000): 1kb windows starting at TSS. M<sub>s</sub> (1000;2000): 1kb windows starting 1kb downstream of TSS.

| Gene      | Entry      | Coordinates               | M <sub>s</sub> | Cov(1 <sup>st</sup> Exon) |
|-----------|------------|---------------------------|----------------|---------------------------|
| MORN3     | uc001uax.1 | chr12:120591628-120591943 | 0.240          | 25                        |
| HNRNPK    | uc004ank.2 | chr9:85784854-85784917    | 0.240          | 25                        |
| PINK1     | uc001bdn.1 | chr1:20844588-20844803    | 0.231          | 26                        |
| THSD4     | uc002atg.1 | chr15:69837226-69837468   | 0.200          | 35                        |
| KRT13     | uc002hww.1 | chr17:36914834-36915391   | 0.200          | 25                        |
| KRT13     | uc002hww.1 | chr17:36914834-36915391   | 0.200          | 25                        |
| KRT13     | uc010cxo.1 | chr17:36914834-36915391   | 0.200          | 25                        |
| HIP1R     | uc001udk.1 | chr12:121906426-121906663 | 0.194          | 31                        |
| CST7      | uc002wtx.1 | chr20:24877866-24878211   | 0.194          | 31                        |
| FLJ00251  | uc001mdw.2 | chr11:6524472-6525472     | 0.186          | 43                        |
| ATP8B3    | uc002lty.1 | chr19:1756887-1757159     | 0.185          | 27                        |
| 9-Sep     | uc002jtw.1 | chr17:72883760-72884075   | 0.182          | 33                        |
| TP53      | uc002gii.1 | chr17:7519096-7519536     | 0.179          | 28                        |
| TP53      | uc010cnf.1 | chr17:7519096-7519536     | 0.179          | 28                        |
| TP53      | uc010cng.1 | chr17:7519096-7519536     | 0.179          | 28                        |
| UBXN6     | uc010dty.1 | chr19:4404927-4405090     | 0.179          | 28                        |
| C10orf108 | uc001ifr.2 | chr10:686017-686382       | 0.175          | 40                        |
| CDC42BPB  | uc001ymj.1 | chr14:102500592-102500740 | 0.172          | 29                        |
| PTPRS     | uc002mbz.1 | chr19:5237061-5237399     | 0.167          | 42                        |
| BAGE2     | uc002yit.1 | chr21:10120574-10120796   | 0.167          | 36                        |
| CR617046  | uc001myp.2 | chr11:45187118-45187422   | 0.162          | 74                        |
| KIAA1335  | uc002xjz.1 | chr20:39475378-39477119   | 0.161          | 31                        |
| CPNE4     | uc003eom.1 | chr3:133486774-133486944  | 0.161          | 31                        |
| MYO1H     | uc009zv.1  | chr12:108310871-108311032 | 0.161          | 31                        |
| DNAJC14   | uc001shu.1 | chr12:54507303-54508765   | 0.160          | 50                        |
| KIAA0676  | uc003mlk.1 | chr5:179229861-179230101  | 0.160          | 25                        |
| BAGE5     | uc002yiu.1 | chr21:10120594-10120808   | 0.159          | 44                        |
| BAGE      | uc002yiv.1 | chr21:10120594-10120808   | 0.159          | 44                        |
| GRM2      | uc003dbp.1 | chr3:51717904-51718489    | 0.158          | 57                        |
| SH2D4B    | uc001kck.1 | chr10:82287638-82288251   | 0.157          | 70                        |
| MICAL2PV1 | uc001mkb.2 | chr11:12140202-12140542   | 0.156          | 32                        |
| MICAL2PV2 | uc001mkc.2 | chr11:12140202-12140542   | 0.156          | 32                        |
| AKT2      | uc002one.1 | chr19:45440281-45441049   | 0.156          | 32                        |
| KIAA0676  | uc003mlf.1 | chr5:179225444-179226478  | 0.156          | 32                        |
| MED15     | uc002zst.1 | chr22:19257965-19259519   | 0.155          | 71                        |
| NOC2L     | uc001aby.2 | chr1:882342-883781        | 0.154          | 26                        |
| KANK4     | uc001daf.2 | chr1:62501352-62501684    | 0.154          | 26                        |
| DPH1      | uc002fv.1  | chr17:1889009-1889867     | 0.154          | 26                        |
| LZTR1     | uc002ztp.1 | chr22:19680252-19680401   | 0.154          | 26                        |
| MOV10L1   | uc003bjj.1 | chr22:48870621-48870741   | 0.154          | 26                        |
| MOV10L1   | uc003bjk.2 | chr22:48870621-48870741   | 0.154          | 26                        |
| CNTN2     | uc009xbi.1 | chr1:203293932-203294414  | 0.154          | 26                        |
| LZTS1     | uc003wzr.1 | chr8:20156628-20157083    | 0.151          | 53                        |
| LZTS1     | uc010ltg.1 | chr8:20156628-20157083    | 0.151          | 53                        |
| APBB1     | uc001mda.2 | chr11:6383193-6383465     | 0.150          | 40                        |
| APBB1     | uc001mde.2 | chr11:6383193-6383465     | 0.150          | 40                        |
| ACACB     | uc001toc.1 | chr12:108061585-108062246 | 0.148          | 27                        |
| GRK6      | uc003mgs.1 | chr5:176791318-176791714  | 0.148          | 27                        |
| MID1      | uc004ctm.1 | chrX:10494928-10495643    | 0.148          | 27                        |
| MID1      | uc004ctn.1 | chrX:10494928-10495643    | 0.148          | 27                        |
| MID1      | uc004ctt.2 | chrX:10494928-10495643    | 0.148          | 27                        |
| MID1      | uc004ctu.2 | chrX:10494928-10495643    | 0.148          | 27                        |
| MID1      | uc004cub.1 | chrX:10494928-10495643    | 0.148          | 27                        |
| MID1      | uc010ndy.1 | chrX:10494928-10495643    | 0.148          | 27                        |
| TGM2      | uc002xhq.1 | chr20:36194156-36195576   | 0.147          | 68                        |
| ATP13A1   | uc002nnf.2 | chr19:19626928-19627260   | 0.146          | 41                        |
| KIAA1640  | uc002jxn.2 | chr17:75669837-75670452   | 0.146          | 48                        |
| SBSN      | uc002oad.1 | chr19:40709386-40711052   | 0.146          | 48                        |
| pp9964    | uc001any.1 | chr1:6567949-6569434      | 0.143          | 49                        |
| SLC24A4   | uc001yan.1 | chr14:91988863-91990166   | 0.143          | 28                        |
| RFNG      | uc002kdh.1 | chr17:77601083-77601679   | 0.143          | 28                        |
| TSKS      | uc002ppm.1 | chr19:54958147-54958327   | 0.143          | 28                        |
| ZC3H12D   | uc003qmn.1 | chr6:149837068-149837442  | 0.143          | 63                        |
| BC075797  | uc003ssl.1 | chr7:12562712-12562881    | 0.143          | 28                        |
| GRIK4     | uc009zax.1 | chr11:120036188-120036319 | 0.143          | 28                        |
| CACNG5    | uc010deq.1 | chr17:62303810-62304108   | 0.143          | 28                        |
| NBEAL2    | uc010hjm.1 | chr3:47011526-47012127    | 0.143          | 63                        |
| CYP8B1    | uc010hif.1 | chr3:42890966-42892394    | 0.140          | 50                        |
| GPRC5D    | uc001rbc.1 | chr12:12993691-12994585   | 0.139          | 36                        |
| CNTN2     | uc001hbs.1 | chr1:203294356-203295044  | 0.138          | 29                        |
| MYST1     | uc002eaz.1 | chr16:31044456-31045910   | 0.138          | 29                        |
| HDGF2     | uc002maq.1 | chr19:4450488-4450716     | 0.138          | 29                        |
| NFAM1     | uc003bcn.2 | chr22:41158187-41158345   | 0.138          | 29                        |
| C7orf46   | uc003swo.2 | chr7:23686274-23686427    | 0.138          | 29                        |
| C7orf46   | uc003swq.2 | chr7:23686274-23686427    | 0.138          | 29                        |
| C7orf46   | uc003swr.2 | chr7:23686274-23686427    | 0.138          | 29                        |
| HDGF2     | uc010dua.1 | chr19:4450488-4450716     | 0.138          | 29                        |
| TG        | uc010mdw.1 | chr8:133979076-133979213  | 0.138          | 29                        |
| ESPNL     | uc002vxq.2 | chr2:238673690-238674093  | 0.137          | 102                       |
| ETV6      | uc001raa.1 | chr12:11913625-11914170   | 0.136          | 44                        |
| HNRNPK    | uc004anf.2 | chr9:85784888-85785004    | 0.136          | 44                        |
| HNRNPK    | uc004ang.2 | chr9:85784888-85785004    | 0.136          | 44                        |
| HNRNPK    | uc004anh.2 | chr9:85784888-85785004    | 0.136          | 44                        |

|                |             |                           |       |     |
|----------------|-------------|---------------------------|-------|-----|
| HNRNPK         | uc004ani.2  | chr9:85784888-85785004    | 0.136 | 44  |
| HNRNPK         | uc004anj.2  | chr9:85784888-85785004    | 0.136 | 44  |
| MST066         | uc002dmw.1  | chr16:24849606-24850226   | 0.135 | 37  |
| ARHGAP17       | uc002dmx.1  | chr16:24849606-24850226   | 0.135 | 37  |
| MST066         | uc002dne.1  | chr16:24849606-24850226   | 0.135 | 37  |
| TACC1          | uc003xmh.2  | chr8:38796197-38797310    | 0.135 | 37  |
| TACC1          | uc010lwq.1  | chr8:38796197-38797310    | 0.135 | 37  |
| DKFZp761P19121 | uc003ejh.1  | chr3:128227918-128229619  | 0.135 | 89  |
| BCR-ABL        | uc010gtx.1  | chr22:21925986-21926167   | 0.135 | 52  |
| C13orf35       | uc001vsh.1  | chr13:112349359-112349913 | 0.133 | 30  |
| INPP4A         | uc002syy.1  | chr2:98502841-98503049    | 0.133 | 30  |
| SLC22A7        | uc003ous.2  | chr6:43373976-43374467    | 0.133 | 30  |
| SLC22A7        | uc003out.1  | chr6:43373976-43374467    | 0.133 | 30  |
| CAMTA2         | uc010ckv.1  | chr17:4823703-4824640     | 0.133 | 30  |
| SLC22A7        | uc010jyl.1  | chr6:43373976-43374467    | 0.133 | 30  |
| SLC22A7        | uc010jym.1  | chr6:43373976-43374467    | 0.133 | 30  |
| ARHGEF10L      | uc001baq.1  | chr1:17814170-17815284    | 0.132 | 53  |
| FLJ00133       | uc002wak.2  | chr2:241653388-241653684  | 0.132 | 38  |
| hCG_31249      | uc004bzl.2  | chr9:132295490-132295812  | 0.131 | 61  |
| GPSM1          | uc004che.1  | chr9:138369803-138370119  | 0.130 | 46  |
| AMPD2          | uc001dyd.1  | chr1:109969572-109969937  | 0.129 | 31  |
| PPFIA4         | uc001gyz.1  | chr1:201286934-201287628  | 0.129 | 31  |
| BLK            | uc003wua.1  | chr8:11455251-11456370    | 0.129 | 31  |
| PRKAG2         | uc003wkj.1  | chr7:151142435-151142890  | 0.128 | 39  |
| HBE269         | uc010ncg.1  | chr9:139409576-139409677  | 0.128 | 39  |
| CRTAC1         | uc001kot.1  | chr10:99685917-99686113   | 0.127 | 55  |
| limkain        | uc001ufv.1  | chr12:122993847-122996061 | 0.126 | 95  |
| FLAD1          | uc001fgh.1  | chr1:153227157-153227949  | 0.125 | 32  |
| ACP2           | uc001nei.1  | chr11:47226803-47226939   | 0.125 | 32  |
| MYO7A          | uc001oyd.1  | chr11:76563292-76563608   | 0.125 | 32  |
| BEAN           | uc002eoq.1  | chr16:65061006-65061269   | 0.125 | 40  |
| CBFA2T3        | uc002fmm.1  | chr16:87570566-87570902   | 0.125 | 32  |
| CBFA2T3        | uc002fmm.1  | chr16:87570566-87570902   | 0.125 | 32  |
| SERPINB6       | uc003muk.1  | chr6:2904401-2906560      | 0.125 | 40  |
| AGAP3          | uc003wjj.1  | chr7:150462420-150462588  | 0.125 | 32  |
| ACP2           | uc009ylj.1  | chr11:47226803-47226939   | 0.125 | 32  |
| ACP2           | uc009ylk.1  | chr11:47226803-47226939   | 0.125 | 32  |
| dJ402G11.5     | uc010hap.1  | chr22:48986873-48987076   | 0.125 | 48  |
| MYT1           | uc002vij.1  | chr20:62309391-62310284   | 0.123 | 57  |
| MYO7A          | uc009yut.1  | chr11:76568429-76568647   | 0.123 | 57  |
| TCF3           | uc002lto.1  | chr19:1573053-1573222     | 0.122 | 41  |
| MEGF5          | uc003mac.1  | chr5:168204167-168204434  | 0.122 | 41  |
| ZNF687         | uc009wmp.1  | chr1:149525375-149527506  | 0.122 | 82  |
| SMARCA4        | uc010dxt.1  | chr19:10984438-10984788   | 0.122 | 41  |
| PAX8           | uc002tjo.1  | chr2:113710649-113711555  | 0.121 | 33  |
| TESSP2         | uc003cqi.1  | chr3:46850205-46850317    | 0.120 | 25  |
| FGF17          | uc003xai.1  | chr8:21958129-21959748    | 0.120 | 75  |
| KIAA1542       | uc009ybz.1  | chr11:582035-582674       | 0.119 | 42  |
| KRT74          | uc001sap.1  | chr12:51253358-51253876   | 0.118 | 34  |
| CATSPER2       | uc001zsh.1  | chr15:41728119-41728331   | 0.118 | 34  |
| CATSPER2       | uc001zsi.1  | chr15:41728119-41728331   | 0.118 | 34  |
| CATSPER2       | uc001zsk.1  | chr15:41728119-41728331   | 0.118 | 34  |
| SMARCA4        | uc002mqg.1  | chr19:10955800-10956049   | 0.118 | 34  |
| SMARCA4        | uc002mqj.2  | chr19:10955800-10956049   | 0.118 | 34  |
| MED15          | uc002zss.1  | chr22:19238526-19239435   | 0.118 | 51  |
| LYPD2          | uc003yww.1  | chr8:143830814-143830954  | 0.118 | 34  |
| SMARCA4        | uc010dxq.1  | chr19:10955800-10956049   | 0.118 | 34  |
| SMARCA4        | uc010dxx.1  | chr19:10955800-10956049   | 0.118 | 34  |
| SMARCA4        | uc010dxx.1  | chr19:10955800-10956049   | 0.118 | 34  |
| pp9320         | uc003yzz.2  | chr8:144993669-144994190  | 0.117 | 120 |
| CTBP1          | uc003gct.1  | chr4:1221971-1222132      | 0.116 | 43  |
| SLC6A19        | uc003jhw.2  | chr5:1254710-1254967      | 0.116 | 43  |
| RALGDS         | uc004ccn.1  | chr9:134966728-134967125  | 0.116 | 43  |
| TMEM132A       | uc001nqm.1  | chr11:60458536-60458812   | 0.116 | 95  |
| FBLIM1         | uc001axi.1  | chr1:15964046-15964315    | 0.115 | 26  |
| DISC1          | uc001hvc.2  | chr1:229896199-229897174  | 0.115 | 78  |
| MCF2L          | uc001vst.1  | chr13:112746970-112747203 | 0.115 | 26  |
| CLK3           | uc002ayl.2  | chr15:72703014-72704412   | 0.115 | 26  |
| SPATA22        | uc002fvo.1  | chr17:3321726-3321831     | 0.115 | 26  |
| ZNF335         | uc002xqv.1  | chr20:44015735-44016750   | 0.115 | 26  |
| TRIM7          | uc003mmv.1  | chr5:180559457-180560536  | 0.115 | 26  |
| IRF4           | uc003mtc.1  | chr6:342056-342252        | 0.115 | 26  |
| ANKRD6         | uc003pnh.2  | chr6:90369431-90369565    | 0.115 | 26  |
| GLIS3          | uc003zic.1  | chr9:4276038-4276996      | 0.115 | 26  |
| HPCAL1         | uc010exf.1  | chr2:10426341-10426794    | 0.115 | 26  |
| NM_001127438   | uc010nmy.1  | chrX:99081047-99081497    | 0.115 | 26  |
| SLC22A1        | uc003qtc.1  | chr6:160462853-160463368  | 0.114 | 35  |
| SLC22A1        | uc003qtd.1  | chr6:160462853-160463368  | 0.114 | 35  |
| EP400NL        | uc001ujv.2  | chr12:131154495-131155802 | 0.114 | 44  |
| UNQ830         | uc002vtr.1  | chr2:233443238-233443368  | 0.114 | 44  |
| KIF1A          | uc002vzx.1  | chr2:241313361-241314088  | 0.114 | 44  |
| TBC1D24        | uc002ccqm.1 | chr16:2486036-2487115     | 0.112 | 188 |
| PIWIL4         | uc001pfa.1  | chr11:93940182-93940419   | 0.111 | 36  |
| AQP2           | uc001rvn.1  | chr12:48630796-48631240   | 0.111 | 63  |
| MBD6           | uc001sok.1  | chr12:56205398-56206438   | 0.111 | 36  |
| ACADS          | uc001tzb.2  | chr12:119659157-119659321 | 0.111 | 27  |

|          |            |                           |       |    |
|----------|------------|---------------------------|-------|----|
| RHBDL1   | uc002cis.1 | chr16:666076-666498       | 0.111 | 27 |
| ARHGAP17 | uc002dna.1 | chr16:24873425-24876358   | 0.111 | 54 |
| EFCBP2   | uc002fhe.1 | chr16:82563017-82563281   | 0.111 | 27 |
| RHBDF2   | uc002jrs.1 | chr17:71989052-71989222   | 0.111 | 27 |
| MAP4K1   | uc002oix.1 | chr19:43800277-43800483   | 0.111 | 27 |
| MAP4K1   | uc002oij.1 | chr19:43800277-43800483   | 0.111 | 27 |
| SGK2     | uc002xkq.1 | chr20:41602205-41602362   | 0.111 | 27 |
| CARMA3   | uc003asv.1 | chr22:36220039-36220529   | 0.111 | 27 |
| RHO      | uc003emt.1 | chr3:130730172-130730627  | 0.111 | 27 |
| AMOTL2   | uc003eqf.1 | chr3:135572232-135573026  | 0.111 | 72 |
| SLC26A1  | uc003gbx.1 | chr4:977089-977224        | 0.111 | 27 |
| SLC26A1  | uc003gcb.1 | chr4:977089-977224        | 0.111 | 27 |
| SLC26A1  | uc003gcc.1 | chr4:977089-977224        | 0.111 | 27 |
| KIAA0294 | uc003wpu.2 | chr8:1795470-1795757      | 0.111 | 36 |
| ATP2B3   | uc004fhs.1 | chrX:152454774-152455107  | 0.111 | 27 |
| ATP2B3   | uc004fht.1 | chrX:152454774-152455107  | 0.111 | 27 |
| KIAA1933 | uc010cfd.1 | chr16:66943484-66943813   | 0.111 | 27 |
| ASPDH    | uc010enz.1 | chr19:55708841-55708954   | 0.111 | 36 |
| PIWIL2   | uc010ltv.1 | chr8:22189025-22189487    | 0.111 | 63 |
| AK123118 | uc001uke.1 | chr12:131362142-131362495 | 0.109 | 55 |
| CALML4   | uc002arb.1 | chr15:66284637-66285502   | 0.109 | 46 |
| CALML4   | uc002arc.1 | chr15:66284637-66285502   | 0.109 | 46 |
| SH3BP2   | uc003gfm.2 | chr4:2797850-2798843      | 0.109 | 46 |
| NCOR2    | uc001ugh.2 | chr12:123545646-123545867 | 0.108 | 37 |
| MAP3K10  | uc002onb.1 | chr19:45396122-45396302   | 0.108 | 37 |
| CTCF     | uc002xym.2 | chr20:55533490-55533589   | 0.108 | 37 |
| CTCF     | uc010giw.1 | chr20:55533490-55533589   | 0.108 | 37 |
| CTCF     | uc010giy.1 | chr20:55533490-55533589   | 0.108 | 37 |
| CTCF     | uc010giz.1 | chr20:55533490-55533589   | 0.108 | 37 |
| CTCF     | uc010gjf.1 | chr20:55533490-55533589   | 0.108 | 37 |
| CTCF     | uc010gjj.1 | chr20:55533490-55533589   | 0.108 | 37 |
| CTCF     | uc010gji.1 | chr20:55533490-55533589   | 0.108 | 37 |
| TNKS1BP1 | uc001njp.1 | chr11:56826509-56827529   | 0.108 | 65 |
| TNKS1BP1 | uc001njq.1 | chr11:56826509-56827529   | 0.108 | 65 |
| SDK1     | uc003smy.1 | chr7:4135843-4136255      | 0.108 | 65 |
| PMPCA    | uc004chm.1 | chr9:138430340-138431487  | 0.108 | 65 |
| C1orf167 | uc001ata.2 | chr1:11762446-11762654    | 0.107 | 28 |
| C18orf22 | uc002lnt.1 | chr18:75902290-75903207   | 0.107 | 28 |
| MCM5     | uc003anw.1 | chr22:34136402-34136903   | 0.107 | 28 |
| GOLGA2   | uc004buh.1 | chr9:130062565-130062902  | 0.107 | 28 |
| NLRC3    | uc010btn.1 | chr16:3567151-3567393     | 0.107 | 28 |
| IGSF11   | uc003eby.1 | chr3:120347350-120347588  | 0.106 | 47 |
| IGSF11   | uc003ebz.1 | chr3:120347350-120347588  | 0.106 | 47 |
| UBAP2    | uc003ztn.1 | chr9:33917795-33918833    | 0.106 | 47 |
| IGSF11   | uc010hqs.1 | chr3:120347350-120347588  | 0.106 | 47 |

**Table S3.6**

**Top-1% Saqqaq genes showing highest methylation levels in the first exon.**



### 3.6. Predicting the Saqqaq age at death using age-dependent CpG signatures

DNA methylation levels have been shown to change with age in human tissues [Alish et al. 2012; Day et al. 2013; Johansson et al. 2013]. In this section, we explored whether ancient methylation levels as measured through  $M_s$  in the Saqqaq sequence data could be used to propose an age at death for the Saqqaq individual. Recently, Koch and Wagner [2011] proposed to use methylation levels at four CpG sites associated with the genes TRIM58, KCNQ1DN, NPTX2 and GRIA2 (cg07533148, cg01530101, cg1279989, cg25148589, respectively) and at one additional hypomethylated CpG site (BIRC4BP, cg23571857) to predict the age of modern human individuals. This framework enabled relatively precise predictions, with average differences between predicted and real age of about 11 years and could potentially be used to propose a range for the age at death of the Saqqaq individual. As cg1279989 showed no overlap with the Illumina 450k array data available from [Siekler et al. 2013], further analyses were restricted to the other four loci. As a positive control, we first used the linear regressions provided in [Koch and Wagner 2011] in order to predict the age of five donor individuals (PT1, PT2, PT3, PT4 and PT5) from their methylation levels at each four loci. Such linear models have been built using methylation levels from two types of tissues (dermis and epidermis) and three cell lines (cervical smear cells, monocytes and T cells) and are likely robust across a large range of somatic tissues. We therefore hypothesized that the linear model was correct for hairs. Predicted ages are plotted in Figure S3.14 together with the known age for each donor individual. Overall, predictions based on observed methylation levels at cg07533148 and cg01530101 were consistent with each other, providing age estimates within 1.7-12.4 years (standard deviation = 5.7 years) around the real age of donor individuals. This is in agreement with the accuracy levels reported in Koch and Wagner [2011]. Inconsistent values showing large differences between predicted and real age values (16.1-39.4 years, standard deviation = 9.4 and 12.4 years, respectively) were found for the other two loci. Consequently, we decided to base our predictions for the age at death of the Saqqaq individual on the first two CpGs only (cg07533148 and cg0153010).

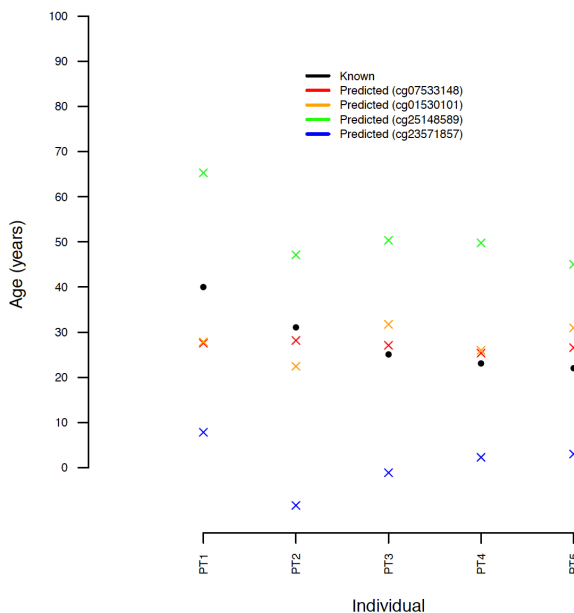

**Figure S3.14**

#### Predictions for the age of five modern human individuals based on methylation levels at four CpG sites.

Four CpG sites showing age-dependent methylation levels have been considered (cg07533148, red; cg01530101, orange; cg25148589, green, and cg23571857, blue; [Koch and Wagner 2011]). We predicted (coloured crosses) the age of five modern human individuals (PT1, PT2, PT3, PT4 and PT5) for which methylation information was available and compared our predictions to the known age of each individual (black).

We then used the procedure described in Supplemental Section SI3.4 in order to calculate absolute methylation levels for the Saqqaq at these two loci. Briefly, we relied on a linear model relating  $M_s$  values (as calculated within a 2,000 bp-wide region centered on each CpG site) and hair methylation levels measured in any of the five modern human individuals. In this first linear model, different CpG subsets were considered depending on their coverage (a full range of possible coverage was considered, spanning every 50 counts from 100 to 500). Methylation levels were predicted for the Saqqaq individual using the predict() function in R [R Development Core Team 2012] and a confidence level of 0.999. Saqqaq methylation values as predicted from the first linear model were further converted into absolute age using a second linear model, namely the linear regression provided in Koch and Wagner [2011]. Predictions are provided in Figure S3.15 for the full range of coverage investigated. The age at death is predicted at around 44.1-69.4 and 52.1-64.2 years for both CpG considered. Given error margins estimated with modern human donors (shifted by up to 12.4 years), these values should not be taken as precise point estimates but rather as an indication that the Saqqaq individual was most likely old when he died. We should also insist that our estimate depend on a number of strong assumptions that remain to be investigated with further studies: 1) the age-dependency of methylation levels at cg07533148 and cg0153010 has remained constant in recent modern human evolution; 2) the age-dependency of methylation levels at cg07533148 and cg0153010 as described in Koch and Wagner [2011] is robust across a range of human populations and environments.

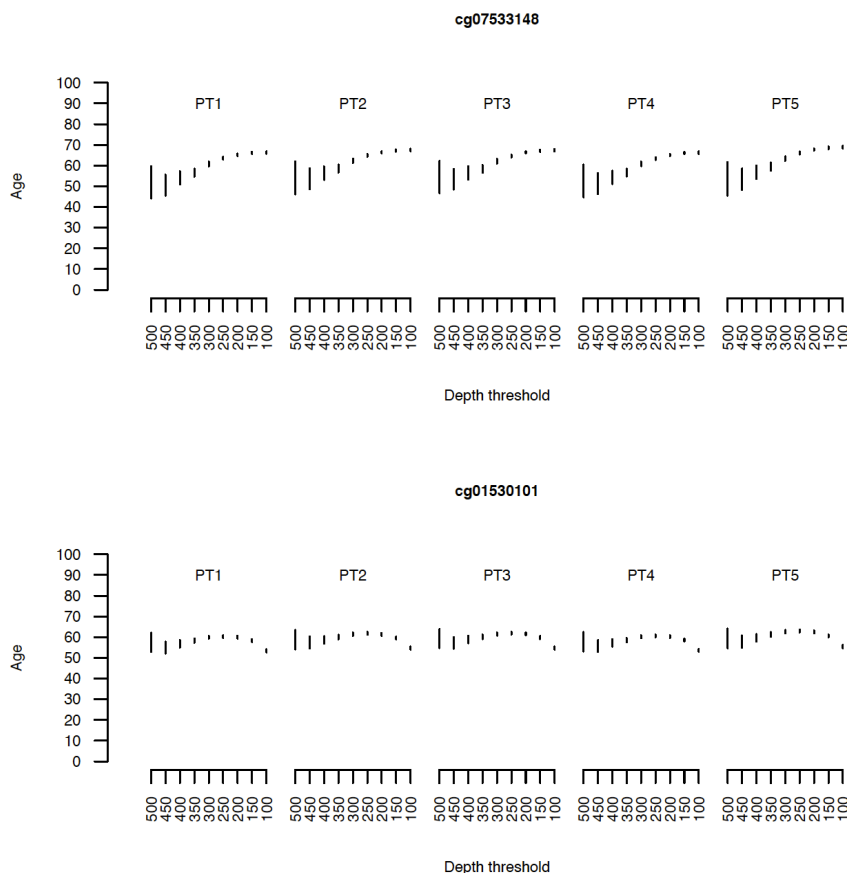

**Figure S3.15**  
**Predictions for the age at death of the Saqqaq individual based on inferred methylation levels at two CpG sites.** We predicted the age at death of the Saqqaq individual using on one hand the methylation levels estimated at two CpG sites (cg07533148 and cg0153010) and on the other hand the linear relationship between methylation levels and age as reported in [Koch and Wagner 2011]. Different subsets of CpGs showing a range of minimal coverage were considered to estimate the Saqqaq methylation levels based on  $M_s$  values.

### 3.7. Methylation profiles across nucleosomes

CTCF (CCCTC-binding Factor) sites play a critical role in shaping the 3D architecture of our genome [Bell and Felsenfeld 2000]. An overall number of 15,000-40,000 of CTCF sites showing quite permissive consensus sequences of 20 nucleotides are interspersed in the human genome [Kim et al. 2007]. Recruitment of the CTCF protein at CTCF sites induces strong chromatin remodelling, positioning arrays of 10 nucleosomes over the ~2kb flanking genomic regions. Within those regions, nucleosomes are strongly phased, showing footprints of ca. 110-170 nucleotides (depending on the nature of histone modifications; 118 bp for mononucleosome data) and are separated by ca. 0-60 bp long spacers (33 bp for mononucleosome data) [Fu et al. 2008].

We retrieved hg18 genomic coordinates of 12,864 CTCF 20-mer binding sites from the Supplemental Table 1 provided in Fu and colleagues [Fu et al. 2008]. We next calculated average  $M_s$  values for each 25bp window (1bp increment) within 1kb upstream and downstream of the CTCF binding site and compared these to nucleosome positioning represented by GC-corrected read depth (Figure 4.d). Overall, peaks in methylation levels coincided with sites of low nucleosome occupancy in agreement with independent empirical evidence in modern human cells [Kelly et al. 2012]. We also recovered a 63bp large footprint for the CTCF protein using the central region with lowest methylation levels ( $<0.024$ ), as methylation is known to suppress CTCF DNA-binding [Bell et al. 2001].

We investigated whether the greater power to detect methylation in positions with greater read depth could be responsible for the pattern observed at CTCF sites. We therefore performed the same analysis by down-sampling sites across the full region. Down-sampling was performed for each position located 1,000 nucleotides upstream and downstream of CTCF binding sites in order to represent each position with similar depth-of-coverage (from 20 to 100, iterating every 10). We generated 100 down-sampled datasets (per depth-of-coverage investigated), calculated  $M_s$  at each position then tested for correlation with nucleosome positioning. The results are provided in Table S3.7. While stronger correlation were found for datasets down-sampled at higher depth, we found a significantly negative correlation between  $M_s$  and nucleosome occupancy for all dataset investigated ( $-0.0896 \leq$  Pearson correlation coefficient  $\leq -0.254$  ;  $p$ -value  $\leq 6.05 \times 10^{-5}$ ). This clearly demonstrates that the greater power to detect methylation in positions with greater read depth does not preclude our ability to detect correct methylation and nucleosome positioning signal at CTCF sites.

We then profiled methylation levels at non-CTCF nucleosomes (Figure 4.e). We defined CTCF-nucleosomes as those nucleosomes located within a 1kb of a CTCF binding sites. Conversely, non-CTCF nucleosomes consist of any nucleosome call not overlapping these regions.

We then defined any position within 73bp of a nucleosome center as inside (labeled "In"), while sites located within 85-110bp from the nucleosome centers were considered flanking regions (labeled "Out"; Figure 3.a). We required two consecutive nucleosomes centers to be separated by at least 183bp in order to avoid overlap between In and Out. We calculated  $M_s$  for the In and Out group and for each position relative to the nucleosome center (-200;+200) following the procedure described in Figure S3.4. Finally, we plotted raw  $M_s$  (without smoothing) as a function of the distance to nucleosome centers.

We found that on average non-CTCF nucleosomes showed similar methylation as that of nucleosomal DNA (“In”) and spacer DNA (“Out”; data not shown). We also identified that the 20 nucleotides flanking nucleosome centers were enriched in strong dinucleotides and were strongly depleted of methylation, suggesting a possible functional role for this region in relation with correct nucleosome positioning (Figure 4.e, Figure S2.12).

| Depth        | 20       | 30       | 40       | 50       | 60       | 70       | 80       | 90       | 100      |
|--------------|----------|----------|----------|----------|----------|----------|----------|----------|----------|
| Mean cor.    | -0.11831 | -0.13805 | -0.1576  | -0.1714  | -0.1871  | -0.1986  | -0.2094  | -0.2191  | -0.2306  |
| Max cor.     | -0.1656  | -0.18501 | -0.215   | -0.22    | -0.2203  | -0.2381  | -0.2401  | -0.2605  | -0.254   |
| Min cor.     | -0.08958 | -0.08654 | -0.1213  | -0.1216  | -0.1468  | -0.158   | -0.1772  | -0.1883  | -0.1911  |
| Mean p-value | 3.01E-06 | 1.85E-06 | 1.89E-09 | 5.74E-10 | 5.15E-13 | 1.53E-14 | 3.06E-17 | 3.45E-19 | 6.97E-20 |
| Max p-value  | 6.05E-05 | 1.07E-04 | 5.29E-08 | 5.06E-08 | 4.32E-11 | 1.25E-12 | 1.51E-15 | 2.18E-17 | 6.92E-18 |
| %Data lost   | 0.1      | 0.2      | 0.2      | 0.25     | 0.3      | 0.4      | 1.9      | 6.8      | 18.94    |

**Table S3.7**

**Nucleosome and methylation patterns at CTCF sites are robust to down-sampling.**

Each position located within 1,000 upstream and downstream of CTCF sites was down-sampled to a given depth-of-coverage. We considered a range of possible coverage from 20 to 100, where coverage =  $N1+N2+M1+M2$  (Figure S3.3). Mean (Min) cor. = average (minimum) Pearson correlation coefficient across 100 correlation tests performed between  $M_s$  and nucleosome positioning, where  $M_s$  has been calculated following down-sampling. Mean (Max) p-value = average (maximum) p-value of Pearson correlation analyses performed across 100 correlation tests performed between  $M_s$  and nucleosome positioning, where  $M_s$  has been calculated following down-sampling. %Data lost indicates the fraction of the positions showing depth-of-coverage inferior to the threshold considered.

## Section SI4. Expression analysis

We retrieved Saqqaq methylation levels at promoters and gene body regions from 280 genes whose proteins have been identified following proteomic analysis of human hair shaft (an extra number of 65 other proteins described in the original publication could not be identified without ambiguity and were therefore disregarded) [Lee et al. 2006]. Those represented a total number of 567 possible transcripts. We then calculated the level of gene body to promoter methylation as a proxy for gene expression, following the procedure described by Ball et al. [2009]. Promoters (PM) were defined as spanning -500 to +2000 around the TSS and gene bodies (GB) as the region from +2000 to the termination site. We then calculated the  $M_s$  statistics for PM and GB as indicated in Figure S3.3. We finally calculated the ratio of methylation  $M_s(\text{GB})$  over  $M_s(\text{PM})$  that we called  $R_s$ . At promoters showing null  $M_s$  values, we arbitrarily set  $R_s$  to an infinite number, suggesting high expression levels [Ball et al. 2009]. Following a procedure identical to that described in Supplemental Section SI3.4, we first selected all genes showing a minimum coverage of 25 and 75 over their promoter and gene body, respectively. We then selected genes where coverage at promoters was at least equivalent to that observed within gene bodies, correcting for length differences between PM and RE regions. A total number of 140 genes (271 transcripts) from the original list fulfilled those criteria (Table S4.1). Unfortunately, genes for Keratin Associated Proteins, which represent together with keratins major structural components of the hair shaft [Gong et al. 2012], showed not sufficient coverage and could not be investigated for expression patterns.

We compared the distribution of  $R_s$  for that list of 140 genes known to be expressed at the protein level in hair shaft and for the full list of genes annotated in the human reference genome (hg18; using similar filtering criteria, this represented a total number of 29,070 genes). We found the former to be significantly greater than the latter (Kolmogorov-Smirnov test,  $p$ -value = 0.00152), in agreement with the fact that it consists of known expressed genes in contrast to the whole gene dataset that is a mixture of silenced and expressed genes. This suggests that  $R_s$  captures genuine expression information. Of note, we identified amongst the genes showing high to extremely high  $R_s$  values a range of transcripts for keratin proteins such as keratins 71 and 85 [Moll et al. 2008] (Table S4.1). Those proteins were likely expressed in the Saqqaq hairs, in agreement with functional studies of modern hairs. Keratin 85 has been detected at high levels in the hair shaft cortex and medulla [Langbein et al. 2010]. Keratin 71 is also a hair-specific keratin expressed in the inner root sheath [Langbein et al. 2010]. This contrasts with keratin 82, one member of group C type II hair keratins, that is absent from the medulla and restricted to a thin external cuticle layer [Langbein et al. 2010] and for which we also found relatively low  $R_s$  value (Table S4.1). Similarly, we found a low  $R_s$  value for keratin 79, suggesting low expression levels, if any, in agreement with its classification amongst non hair-specific epithelial keratins [Moll et al. 2008]. In addition to hair-specific keratins, we confirmed the presence of a number of proteins involved in cellular adhesion and cytoskeleton organization. In particular, we predicted the presence of Plakophilin 1 and 3 and, to a lesser extent, Plectin and Desmoplakin (Table S4.1), two proteins associated with cell-cell adhesion via desmosomes, a feature known to be key for the structural organization of hairs [Bazzi et al. 2009]. We also predicted high levels of trichohyalin (TCHH), a protein known to confer mechanical strength to the hair follicle inner root sheath. Altogether, this suggests that the level of gene body over promoter methylation,  $R_s$ , could be used as a genuine proxy for predicting gene expression. We therefore stratified genes according to  $R_s$  quartiles and we used the first and the top quartiles as provisional lists of genes (7,263-7,264 UCSC entries per quartile considered, representing 4,174 and 3,700 non-redundant entries respectively). In

Supplemental Section SI3.5, we identified a subset of 214 genes showing highest (top-1%) methylation levels in their first exon (159 are not redundant; Table S3.5). This represents a list of candidates for low (null) expression levels given the documented tight association between methylation at first exon and silencing [Brenet et al. 2011]. Therefore, this subset of genes is expected to vastly coincide with genes present in the first  $R_s$  quartile (ie. with minimal  $R_s$  values), as the latter defines a provisional list of genes whose expression was down-regulated in the Saqqaq hairs. Interestingly, 100.0% of the genes identified as showing highest methylation levels in their first exon belong to the first  $R_s$  quartile. No genes identified as showing highest methylation levels in their first exon belong to other quartiles, which demonstrates the strong consistency in our expression predictions. Extending the list of genes showing highest methylation levels in their first exon to the top-5% (instead of the top-1%; for a total number of 1,089 genes) does not affect those conclusions, as 88.3% and 9.0% intersect the first and second  $R_s$  quartiles, respectively, leaving only a number of 20 (2.35%) and 3 (0.35%) genes in the third and fourth quartiles. In tables S4.2 and S4.3, we provide the bottom-1,000 and top-1,000 genes ranked by  $R_s$  values, together with their respective coverage in PM and RE regions. Those lists provide candidate genes whose expression was respectively down-regulated and up-regulated in the Saqqaq hairs. We performed functional enrichment analyses of those candidates in DAVID [Huang et al. 2009], considering only those categories with enrichment scores (ES) superior or equal to 1.2 and within each category, the term showing lowest Benjamini-Hochberg p-values (terms with p-values superior to 0.05 were disregarded). Down-regulated candidates were enriched in the following functional categories: Signal (ES = 3.95; Counts = 203; BH p-value =  $7.77 \times 10^{-6}$ ), Cell adhesion (ES = 3.87; Counts = 37; BH p-value = 0.0052) Peptidase S1/S6 – Chymotrypsin/Hap (ES = 3.66; Counts = 20; BH p-value =  $6.78 \times 10^{-4}$ ), Plasma membrane part (ES = 3.10; Counts = 134; BH p-value = 0.0433), Ionic channel (ES = 2.98; Counts = 35; BH p-value =  $1.60 \times 10^{-4}$ ), Homeobox (ES = 2.51; Counts = 23; BH p-value = 0.0432), Glycoprotein (ES = 2.08; Counts = 239; BH p-value = 0.0016), and Muscle protein (ES = 1.27; Counts = 14; BH p-value =  $1.34 \times 10^{-4}$ ). Up-regulated candidates were enriched in the following functional categories: Ubiquitin ligase complex (ES = 3.97; Counts = 19; BH p-value =  $6.24 \times 10^{-5}$ ), Phosphorus metabolic process (ES = 2.36; Counts = 78; BH p-value = 0.0231), Ligase (ES = 2.16; Counts = 30; BH p-value = 0.0079), Metal-binding (ES = 2.11; Counts = 173; BH p-value = 0.0110) and Inorganic anion transport (ES = 1.72; Counts = 15; BH p-value = 0.0383).

In order to further assess the validity of our expression predictions, we contrasted microarray expression data from modern hair and  $R_s$  values. Mean expression of 10 hair microarray samples from [Kim et al. 2006] (normalized expression data downloaded from GEO (id:GSE3058) was used to partition the represented genes into 10, 20 and 50 quantiles by expression. In addition to  $R_s$  (Expression Proxy 1) two other proxies for gene expression were defined based on the literature:

**Expression Proxy 2: The read depth over the +1 nucleosome.** Calculated as the mean GC-corrected read depth in the region 0 to 200 downstream of the TSS, following [Valouev et al. 2011].

**Expression Proxy 3: The strength of the phasing.** Signal strength of regularly spaced nucleosomes downstream of the TSS. The mean spectral density was computed over the  $TSS \pm 1000$  for the genes of each quantile by the Welch method and the signal strength at the maximum frequency estimated for each quantile, following [Schones et al. 2008].

The correlation for the proxy and the mean expression of these groups was then calculated using Spearman correlation and significance was determined based on Spearman's rho statistic. Importantly, we found significant correlation between mean expression levels and all our three proxys. This supports the validity of our expression predictions and consequently the quality of both our nucleosome and methylation maps. Spearman's rank correlation coefficient for each of the measures was for 10 groups: **1**) 0.99 ( $p < 2.2e-16$ ), **2**) 0.85 ( $p = 0.00171$ ), **3**) 0.79 ( $p = 0.009844$ ); for 20 groups **1**) 0.95 ( $p = 6.217e-06$ ) **2**) 0.75 ( $p = 0.0002104$ ) **3**) 0.71 ( $p = 0.0006549$ ) and for 50 groups: **1**) 0.87 ( $p < 2.2e-16$ ) **2**) 0.62 ( $p = 3.242e-06$ ) **3**) 0.53 ( $p = 8.968e-05$ ).

| Gene     | UCSC       | R <sub>s</sub> | Cov(GB) | Cov(PM) | M <sub>s</sub> (GB) | M <sub>s</sub> (PM) |
|----------|------------|----------------|---------|---------|---------------------|---------------------|
| GARS     | uc003tbn.1 | NaN            | 106     | 146     | 0.000               | 0.000               |
| RBM14    | uc001oiz.1 | Inf            | 80      | 64      | 0.088               | 0.000               |
| RBM14    | uc001oiy.1 | Inf            | 81      | 80      | 0.086               | 0.000               |
| RBM14    | uc001oiw.1 | Inf            | 81      | 84      | 0.086               | 0.000               |
| RBM14    | uc001oix.1 | Inf            | 81      | 84      | 0.086               | 0.000               |
| RBM14    | uc001oiz.1 | Inf            | 80      | 64      | 0.088               | 0.000               |
| RBM14    | uc001oiy.1 | Inf            | 81      | 80      | 0.086               | 0.000               |
| RBM14    | uc001oiw.1 | Inf            | 81      | 84      | 0.086               | 0.000               |
| RBM14    | uc001oix.1 | Inf            | 81      | 84      | 0.086               | 0.000               |
| UNC84B   | uc010gxr.1 | Inf            | 2013    | 99      | 0.039               | 0.000               |
| RTN4     | uc002ryf.1 | Inf            | 117     | 246     | 0.017               | 0.000               |
| RTN4     | uc002ryg.1 | Inf            | 117     | 246     | 0.017               | 0.000               |
| RTN4     | uc002ryd.1 | Inf            | 114     | 66      | 0.018               | 0.000               |
| RTN4     | uc002rye.1 | Inf            | 117     | 246     | 0.017               | 0.000               |
| 2-Sep    | uc002wbf.1 | Inf            | 260     | 233     | 0.035               | 0.000               |
| 2-Sep    | uc002wbg.1 | Inf            | 260     | 233     | 0.035               | 0.000               |
| 2-Sep    | uc002wbh.1 | Inf            | 260     | 233     | 0.035               | 0.000               |
| SERPINB5 | uc002liz.2 | Inf            | 141     | 30      | 0.014               | 0.000               |
| TSPAN7   | uc004deg.2 | Inf            | 154     | 96      | 0.039               | 0.000               |
| ACOT7    | uc001ams.1 | Inf            | 2372    | 34      | 0.055               | 0.000               |
| PADI3    | uc001bai.1 | Inf            | 371     | 27      | 0.065               | 0.000               |
| AIM1     | uc003prh.1 | Inf            | 260     | 317     | 0.054               | 0.000               |
| SELENBP1 | uc001exx.1 | Inf            | 135     | 32      | 0.022               | 0.000               |
| TCHH     | uc001ezp.2 | Inf            | 356     | 61      | 0.006               | 0.000               |
| LMNA     | uc001fnk.2 | Inf            | 303     | 35      | 0.053               | 0.000               |
| LMNA     | uc001fnj.1 | Inf            | 292     | 38      | 0.051               | 0.000               |
| PKP1     | uc001gwe.1 | Inf            | 536     | 250     | 0.076               | 0.000               |
| PKP1     | uc001gwd.1 | Inf            | 536     | 250     | 0.076               | 0.000               |
| VCP      | uc003zvy.2 | Inf            | 108     | 206     | 0.028               | 0.000               |
| SND1     | uc003vmi.1 | Inf            | 2821    | 178     | 0.045               | 0.000               |
| SEC24C   | uc001jux.1 | Inf            | 193     | 59      | 0.052               | 0.000               |
| SEC24C   | uc001juw.1 | Inf            | 193     | 59      | 0.052               | 0.000               |
| EZR      | uc003qrt.2 | Inf            | 607     | 137     | 0.026               | 0.000               |
| NME2     | uc002itk.1 | Inf            | 448     | 127     | 0.016               | 0.000               |
| NME2     | uc002itj.1 | Inf            | 448     | 127     | 0.016               | 0.000               |
| NME2     | uc002iti.1 | Inf            | 87      | 127     | 0.046               | 0.000               |
| NME2     | uc002ith.1 | Inf            | 87      | 127     | 0.046               | 0.000               |
| NME2     | uc002itk.1 | Inf            | 448     | 127     | 0.016               | 0.000               |
| NME2     | uc002itj.1 | Inf            | 448     | 127     | 0.016               | 0.000               |
| NME2     | uc002iti.1 | Inf            | 87      | 127     | 0.046               | 0.000               |
| NME2     | uc002ith.1 | Inf            | 87      | 127     | 0.046               | 0.000               |
| PKP3     | uc001lpc.1 | Inf            | 601     | 125     | 0.048               | 0.000               |
| P4HB     | uc002kbn.1 | Inf            | 196     | 27      | 0.036               | 0.000               |
| EEF1G    | uc001ntm.1 | Inf            | 115     | 85      | 0.061               | 0.000               |
| CRAT     | uc004bxg.1 | Inf            | 399     | 49      | 0.025               | 0.000               |
| MDH2     | uc003ueo.1 | Inf            | 420     | 125     | 0.048               | 0.000               |
| RPS9P4   | uc002qed.1 | Inf            | 117     | 119     | 0.026               | 0.000               |
| RPS9P4   | uc002qea.1 | Inf            | 117     | 119     | 0.026               | 0.000               |
| RPS9P4   | uc002qed.1 | Inf            | 117     | 119     | 0.026               | 0.000               |
| RPS9P4   | uc002qea.1 | Inf            | 117     | 119     | 0.026               | 0.000               |
| ATP6V1B2 | uc003wzp.1 | Inf            | 87      | 124     | 0.069               | 0.000               |
| ATP6V1A  | uc003eao.1 | Inf            | 331     | 51      | 0.048               | 0.000               |
| PGD      | uc001arc.1 | Inf            | 157     | 180     | 0.038               | 0.000               |
| NPC1     | uc002kum.2 | Inf            | 488     | 182     | 0.055               | 0.000               |
| CLTC     | uc002ixq.1 | Inf            | 250     | 152     | 0.056               | 0.000               |
| CLTC     | uc002ixr.1 | Inf            | 250     | 152     | 0.056               | 0.000               |
| CLTC     | uc002ixp.2 | Inf            | 211     | 152     | 0.052               | 0.000               |
| UQCRC2   | uc002djx.1 | Inf            | 108     | 85      | 0.019               | 0.000               |
| KRT71    | uc001sao.1 | Inf            | 130     | 46      | 0.062               | 0.000               |
| TARS     | uc003jhy.1 | Inf            | 84      | 103     | 0.036               | 0.000               |
| YWHAE    | uc002fsj.1 | Inf            | 527     | 187     | 0.040               | 0.000               |
| NOP58    | uc002uzb.1 | Inf            | 277     | 74      | 0.029               | 0.000               |
| BLMH     | uc002hez.1 | Inf            | 134     | 201     | 0.045               | 0.000               |
| LPCAT3   | uc001qsi.1 | Inf            | 201     | 155     | 0.050               | 0.000               |
| KRT85    | uc001sag.1 | Inf            | 85      | 34      | 0.012               | 0.000               |
| SARS     | uc001dvw.1 | Inf            | 146     | 93      | 0.048               | 0.000               |
| SARS     | uc001dww.1 | Inf            | 146     | 93      | 0.048               | 0.000               |
| USP5     | uc001qri.2 | Inf            | 232     | 118     | 0.047               | 0.000               |
| USP5     | uc001qrh.2 | Inf            | 232     | 118     | 0.047               | 0.000               |
| EIF3E    | uc003ymu.1 | Inf            | 125     | 59      | 0.056               | 0.000               |
| OTUB2    | uc001yci.1 | Inf            | 417     | 189     | 0.041               | 0.000               |
| PGLS     | uc002ngw.1 | 18.016         | 189     | 227     | 0.079               | 0.004               |
| HIP1R    | uc001udj.1 | 17.893         | 1304    | 307     | 0.058               | 0.003               |
| EFHD1    | uc002vtc.1 | 16.748         | 548     | 353     | 0.047               | 0.003               |
| LMNB2    | uc002lvy.1 | 15.878         | 1522    | 281     | 0.057               | 0.004               |
| EEF2     | uc002lze.1 | 14.509         | 611     | 197     | 0.074               | 0.005               |
| CSNK1E   | uc003avj.1 | 13.821         | 776     | 275     | 0.050               | 0.004               |
| MAP7     | uc003qgz.1 | 13.778         | 1019    | 312     | 0.044               | 0.003               |
| YWHAG    | uc003uez.1 | 13.264         | 318     | 222     | 0.060               | 0.005               |
| CSNK1E   | uc003avk.1 | 13.230         | 793     | 269     | 0.049               | 0.004               |
| YWHAZ    | uc003yju.1 | 13.071         | 127     | 332     | 0.039               | 0.003               |
| 2-Sep    | uc002wbc.1 | 12.607         | 262     | 367     | 0.034               | 0.003               |
| 2-Sep    | uc002wbd.1 | 12.607         | 262     | 367     | 0.034               | 0.003               |



|          |            |        |      |     |       |       |
|----------|------------|--------|------|-----|-------|-------|
| CSNK1E   | uc003avp.1 | 12.343 | 557  | 275 | 0.045 | 0.004 |
| CSNK1E   | uc003avq.1 | 12.343 | 557  | 275 | 0.045 | 0.004 |
| VDAC2    | uc001jwz.1 | 12.333 | 90   | 185 | 0.067 | 0.005 |
| VDAC2    | uc001jxa.1 | 12.333 | 90   | 185 | 0.067 | 0.005 |
| PEBP1    | uc001twu.1 | 12.194 | 93   | 189 | 0.065 | 0.005 |
| PLD3     | uc002onj.2 | 11.667 | 621  | 207 | 0.056 | 0.005 |
| PLD3     | uc002onm.2 | 11.667 | 621  | 207 | 0.056 | 0.005 |
| PLD3     | uc002onl.2 | 11.667 | 621  | 207 | 0.056 | 0.005 |
| GDI2     | uc001iim.2 | 10.600 | 225  | 265 | 0.040 | 0.004 |
| GDI2     | uc009xid.1 | 10.600 | 225  | 265 | 0.040 | 0.004 |
| GDI2     | uc001iil.2 | 10.600 | 225  | 265 | 0.040 | 0.004 |
| UNC84B   | uc003awh.1 | 10.286 | 741  | 206 | 0.050 | 0.005 |
| ACTN1    | uc001xkm.1 | 9.721  | 1581 | 327 | 0.059 | 0.006 |
| ACTN1    | uc001xkl.1 | 9.721  | 1581 | 327 | 0.059 | 0.006 |
| CDH1     | uc002ewg.1 | 9.385  | 797  | 220 | 0.043 | 0.005 |
| CDH1     | uc010cfg.1 | 9.385  | 797  | 220 | 0.043 | 0.005 |
| EZR      | uc003qru.2 | 9.344  | 613  | 358 | 0.026 | 0.003 |
| DYNC1H1  | uc001yks.1 | 8.824  | 1771 | 329 | 0.054 | 0.006 |
| TXNL1    | uc002lgg.1 | 8.777  | 130  | 163 | 0.054 | 0.006 |
| YWHAB    | uc002xmt.1 | 8.718  | 78   | 170 | 0.103 | 0.012 |
| YWHAB    | uc002xmu.1 | 8.718  | 78   | 170 | 0.103 | 0.012 |
| VPS35    | uc002eef.2 | 8.684  | 76   | 220 | 0.079 | 0.009 |
| CALM3    | uc002pew.1 | 8.681  | 235  | 255 | 0.068 | 0.008 |
| CTNNA1   | uc003ldh.1 | 8.679  | 949  | 289 | 0.060 | 0.007 |
| HNRNPD   | uc003hmn.1 | 8.625  | 80   | 230 | 0.038 | 0.004 |
| HNRNPD   | uc003hmp.1 | 8.625  | 80   | 230 | 0.038 | 0.004 |
| HNRNPD   | uc003hmo.1 | 8.625  | 80   | 230 | 0.038 | 0.004 |
| HNRNPD   | uc003hmm.1 | 8.625  | 80   | 230 | 0.038 | 0.004 |
| UNC84B   | uc010gxq.1 | 8.195  | 745  | 330 | 0.050 | 0.006 |
| UNC84B   | uc003awi.1 | 8.195  | 745  | 330 | 0.050 | 0.006 |
| ATP5O    | uc002ytl.1 | 8.155  | 103  | 120 | 0.068 | 0.008 |
| YWHAZ    | uc003yju.1 | 8.051  | 127  | 409 | 0.039 | 0.005 |
| ACOX1    | uc002jqe.1 | 7.924  | 301  | 159 | 0.050 | 0.006 |
| ACOX1    | uc002jqf.1 | 7.924  | 301  | 159 | 0.050 | 0.006 |
| ALDH2    | uc001tst.1 | 7.652  | 615  | 181 | 0.042 | 0.006 |
| YWHAZ    | uc010mbr.1 | 7.469  | 192  | 478 | 0.031 | 0.004 |
| LAMP1    | uc001vtm.1 | 7.295  | 757  | 597 | 0.049 | 0.007 |
| PPL      | uc002cyd.1 | 7.263  | 1376 | 253 | 0.057 | 0.008 |
| CTSD     | uc001luc.1 | 7.111  | 486  | 216 | 0.066 | 0.009 |
| LMNA     | uc001fni.2 | 7.000  | 441  | 147 | 0.048 | 0.007 |
| LMNA     | uc001fnh.2 | 7.000  | 441  | 147 | 0.048 | 0.007 |
| LMNA     | uc009wro.1 | 7.000  | 441  | 147 | 0.048 | 0.007 |
| LMNA     | uc001fng.2 | 6.853  | 429  | 147 | 0.047 | 0.007 |
| HEXB     | uc003kdf.2 | 6.722  | 133  | 149 | 0.045 | 0.007 |
| GCN1L1   | uc001txo.1 | 6.715  | 1311 | 142 | 0.047 | 0.007 |
| SEC23B   | uc002wqz.1 | 6.583  | 319  | 105 | 0.063 | 0.010 |
| SEC23B   | uc002wra.1 | 6.583  | 319  | 105 | 0.063 | 0.010 |
| CNDP2    | uc002llm.1 | 6.319  | 771  | 252 | 0.075 | 0.012 |
| ACOT7    | uc001amt.1 | 6.151  | 2454 | 227 | 0.054 | 0.009 |
| LMNB1    | uc003kud.1 | 6.112  | 349  | 474 | 0.026 | 0.004 |
| PDIA6    | uc002rau.1 | 5.840  | 162  | 172 | 0.068 | 0.012 |
| PLEC1    | uc003zac.1 | 5.783  | 3979 | 195 | 0.059 | 0.010 |
| AHNAK    | uc001ntk.1 | 5.752  | 1413 | 301 | 0.038 | 0.007 |
| UBE2L3   | uc002zva.1 | 5.649  | 539  | 203 | 0.056 | 0.010 |
| HADHA    | uc002rgy.1 | 5.494  | 172  | 105 | 0.052 | 0.010 |
| CANX     | uc003mkk.1 | 5.484  | 366  | 223 | 0.025 | 0.004 |
| CANX     | uc003mkl.1 | 5.484  | 366  | 223 | 0.025 | 0.004 |
| GNPMB    | uc003swb.1 | 5.412  | 153  | 138 | 0.039 | 0.007 |
| GNPMB    | uc003swc.1 | 5.412  | 153  | 138 | 0.039 | 0.007 |
| DUSP14   | uc002hnx.2 | 5.409  | 281  | 304 | 0.036 | 0.007 |
| HSD17B12 | uc001mxq.2 | 5.385  | 390  | 105 | 0.051 | 0.010 |
| DSP      | uc003mxx.1 | 5.291  | 326  | 345 | 0.015 | 0.003 |
| CPT1A    | uc001oof.2 | 5.278  | 1766 | 329 | 0.048 | 0.009 |
| CPT1A    | uc001oog.2 | 5.278  | 1766 | 329 | 0.048 | 0.009 |
| CRAT     | uc004bxh.1 | 5.034  | 445  | 224 | 0.022 | 0.004 |
| PCBP2    | uc001sdb.2 | 4.972  | 181  | 150 | 0.033 | 0.007 |
| PCBP2    | uc001sdi.2 | 4.972  | 181  | 150 | 0.033 | 0.007 |
| PCBP2    | uc001sdc.2 | 4.972  | 181  | 150 | 0.033 | 0.007 |
| LAP3     | uc003gph.1 | 4.935  | 207  | 227 | 0.043 | 0.009 |
| CANX     | uc010jlb.1 | 4.678  | 286  | 223 | 0.021 | 0.004 |
| PLEC1    | uc003zab.1 | 4.496  | 3749 | 217 | 0.062 | 0.014 |
| HSP90AA2 | uc001ykv.2 | 4.471  | 1054 | 152 | 0.029 | 0.007 |
| HSP90AA2 | uc001ykv.2 | 4.471  | 1054 | 152 | 0.029 | 0.007 |
| AHNAK    | uc001nti.1 | 4.470  | 404  | 301 | 0.030 | 0.007 |
| PREP     | uc003prc.1 | 4.262  | 566  | 193 | 0.044 | 0.010 |
| CTNNBIP1 | uc001aqk.1 | 4.138  | 622  | 198 | 0.042 | 0.010 |
| CTNNBIP1 | uc001aql.1 | 4.138  | 622  | 198 | 0.042 | 0.010 |
| ECHS1    | uc001lmu.1 | 4.016  | 310  | 249 | 0.048 | 0.012 |
| YWHAZ    | uc003yju.1 | 3.997  | 289  | 385 | 0.021 | 0.005 |
| PPIB     | uc002and.1 | 3.900  | 100  | 156 | 0.050 | 0.013 |
| SNRPD1   | uc002ktj.1 | 3.892  | 116  | 129 | 0.060 | 0.016 |
| PLEC1    | uc003zad.1 | 3.837  | 4044 | 263 | 0.058 | 0.015 |
| RPS9P4   | uc002qdz.1 | 3.737  | 118  | 147 | 0.025 | 0.007 |
| RPS9P4   | uc002qdy.1 | 3.737  | 118  | 147 | 0.025 | 0.007 |
| RPS9P4   | uc002qdx.1 | 3.737  | 118  | 147 | 0.025 | 0.007 |
| RPS9P4   | uc002qdz.1 | 3.737  | 118  | 147 | 0.025 | 0.007 |

|          |            |       |      |     |       |       |
|----------|------------|-------|------|-----|-------|-------|
| RPS9P4   | uc002qdy.1 | 3.737 | 118  | 147 | 0.025 | 0.007 |
| RPS9P4   | uc002qdx.1 | 3.737 | 118  | 147 | 0.025 | 0.007 |
| PDIA3    | uc001zsu.1 | 3.684 | 152  | 112 | 0.033 | 0.009 |
| PLEC1    | uc003zai.1 | 3.633 | 5847 | 292 | 0.050 | 0.014 |
| DYNLL1   | uc001tyj.1 | 3.604 | 323  | 291 | 0.037 | 0.010 |
| FAM83H   | uc003yzk.1 | 3.505 | 1200 | 437 | 0.064 | 0.018 |
| LMNB1    | uc003kuc.1 | 3.410 | 278  | 474 | 0.014 | 0.004 |
| RBM14    | uc009yrk.1 | 3.311 | 474  | 327 | 0.051 | 0.015 |
| RBM14    | uc009yrk.1 | 3.311 | 474  | 327 | 0.051 | 0.015 |
| PLEC1    | uc003zaf.1 | 3.310 | 4532 | 240 | 0.055 | 0.017 |
| STX12    | uc001bou.2 | 3.245 | 208  | 75  | 0.043 | 0.013 |
| ALDOA    | uc002dwc.1 | 3.224 | 85   | 274 | 0.035 | 0.011 |
| CKAP4    | uc001tlk.1 | 3.202 | 162  | 389 | 0.049 | 0.015 |
| RAB1B    | uc001ohf.1 | 3.167 | 90   | 171 | 0.056 | 0.018 |
| FBP1     | uc004auw.2 | 3.109 | 499  | 179 | 0.052 | 0.017 |
| METAP2   | uc001tec.1 | 2.927 | 193  | 113 | 0.026 | 0.009 |
| METAP2   | uc001tef.1 | 2.927 | 193  | 113 | 0.026 | 0.009 |
| PPP1CB   | uc002rmg.1 | 2.902 | 164  | 272 | 0.043 | 0.015 |
| PPP1CB   | uc002rmh.1 | 2.902 | 164  | 272 | 0.043 | 0.015 |
| DSC3     | uc002kwi.2 | 2.869 | 107  | 307 | 0.009 | 0.003 |
| DSC3     | uc002kwj.2 | 2.869 | 107  | 307 | 0.009 | 0.003 |
| PTBP1    | uc002lpp.1 | 2.829 | 1069 | 432 | 0.039 | 0.014 |
| PTBP1    | uc002lps.1 | 2.829 | 1069 | 432 | 0.039 | 0.014 |
| PTBP1    | uc002lpr.1 | 2.829 | 1069 | 432 | 0.039 | 0.014 |
| RTN3     | uc001nxm.1 | 2.812 | 448  | 189 | 0.045 | 0.016 |
| RTN3     | uc001nxq.1 | 2.812 | 448  | 189 | 0.045 | 0.016 |
| RTN3     | uc001nxp.1 | 2.812 | 448  | 189 | 0.045 | 0.016 |
| RTN3     | uc001nxo.1 | 2.812 | 448  | 189 | 0.045 | 0.016 |
| RTN3     | uc001nxx.1 | 2.812 | 448  | 189 | 0.045 | 0.016 |
| PLEC1    | uc003zah.1 | 2.784 | 5688 | 331 | 0.050 | 0.018 |
| PKM2     | uc002atw.1 | 2.707 | 238  | 451 | 0.042 | 0.016 |
| PKM2     | uc002atx.1 | 2.707 | 238  | 451 | 0.042 | 0.016 |
| PKM2     | uc002aty.1 | 2.707 | 238  | 451 | 0.042 | 0.016 |
| PPA1     | uc001jqv.1 | 2.675 | 106  | 189 | 0.028 | 0.011 |
| SEC23B   | uc002wrc.1 | 2.671 | 313  | 88  | 0.061 | 0.023 |
| FASN     | uc002kdu.1 | 2.577 | 2175 | 568 | 0.068 | 0.026 |
| CAPN12   | uc002ojd.1 | 2.476 | 458  | 54  | 0.046 | 0.019 |
| TOLLIP   | uc001lte.1 | 2.476 | 1703 | 278 | 0.053 | 0.022 |
| TOLLIP   | uc009ycu.1 | 2.476 | 1703 | 278 | 0.053 | 0.022 |
| PHGDH    | uc001ehz.1 | 2.438 | 273  | 121 | 0.040 | 0.017 |
| G6PD     | uc004fly.1 | 2.409 | 274  | 165 | 0.044 | 0.018 |
| C3       | uc002mfm.1 | 2.404 | 892  | 64  | 0.075 | 0.031 |
| ANXA2    | uc002agn.1 | 2.373 | 236  | 140 | 0.017 | 0.007 |
| ANXA2    | uc002agl.1 | 2.373 | 236  | 140 | 0.017 | 0.007 |
| ANXA2    | uc002agm.1 | 2.373 | 236  | 140 | 0.017 | 0.007 |
| ANXA2    | uc002agn.1 | 2.373 | 236  | 140 | 0.017 | 0.007 |
| ANXA2    | uc002agl.1 | 2.373 | 236  | 140 | 0.017 | 0.007 |
| ANXA2    | uc002agm.1 | 2.373 | 236  | 140 | 0.017 | 0.007 |
| LMNA     | uc001fnf.1 | 2.358 | 966  | 134 | 0.035 | 0.015 |
| G6PD     | uc004flx.1 | 2.256 | 266  | 150 | 0.045 | 0.020 |
| KRT32    | uc002hwr.1 | 2.247 | 89   | 40  | 0.056 | 0.025 |
| ABCD1    | uc004ff.1  | 2.234 | 366  | 218 | 0.041 | 0.018 |
| ALDOA    | uc002dvx.1 | 2.204 | 599  | 120 | 0.018 | 0.008 |
| DHX9     | uc001gpr.1 | 2.203 | 240  | 235 | 0.038 | 0.017 |
| YWHAQ    | uc002qzx.1 | 2.200 | 153  | 202 | 0.033 | 0.015 |
| RBM14    | uc001oit.1 | 1.972 | 199  | 327 | 0.030 | 0.015 |
| RBM14    | uc009yri.1 | 1.972 | 199  | 327 | 0.030 | 0.015 |
| RBM14    | uc009yrh.1 | 1.972 | 199  | 327 | 0.030 | 0.015 |
| RBM14    | uc001oit.1 | 1.972 | 199  | 327 | 0.030 | 0.015 |
| RBM14    | uc009yri.1 | 1.972 | 199  | 327 | 0.030 | 0.015 |
| RBM14    | uc009yrh.1 | 1.972 | 199  | 327 | 0.030 | 0.015 |
| KRT80    | uc001rzw.1 | 1.972 | 289  | 57  | 0.035 | 0.018 |
| IQGAP1   | uc002bpl.1 | 1.936 | 550  | 213 | 0.036 | 0.019 |
| VCL      | uc001jwe.1 | 1.934 | 547  | 230 | 0.042 | 0.022 |
| VCL      | uc001jwd.1 | 1.934 | 547  | 230 | 0.042 | 0.022 |
| PLEC1    | uc003zag.1 | 1.868 | 4793 | 282 | 0.053 | 0.028 |
| CSNK1E   | uc003avm.1 | 1.827 | 1943 | 150 | 0.037 | 0.020 |
| ACAA1    | uc003chu.1 | 1.748 | 90   | 118 | 0.044 | 0.025 |
| ACAA1    | uc003cht.1 | 1.748 | 90   | 118 | 0.044 | 0.025 |
| ENO1     | uc001apj.1 | 1.722 | 151  | 208 | 0.033 | 0.019 |
| YWHAQ    | uc002qzw.1 | 1.710 | 153  | 157 | 0.033 | 0.019 |
| ME1      | uc003pjy.1 | 1.691 | 510  | 138 | 0.049 | 0.029 |
| ARF4     | uc003dix.2 | 1.640 | 150  | 123 | 0.013 | 0.008 |
| EFHD1    | uc010fyf.1 | 1.631 | 1156 | 138 | 0.035 | 0.022 |
| ATP5A1   | uc002lbr.1 | 1.558 | 107  | 100 | 0.047 | 0.030 |
| RAB1A    | uc002sdn.1 | 1.553 | 229  | 97  | 0.048 | 0.031 |
| RAB1A    | uc002sdm.1 | 1.553 | 229  | 97  | 0.048 | 0.031 |
| RAB1A    | uc002sdo.1 | 1.553 | 229  | 97  | 0.048 | 0.031 |
| EFHD1    | uc002vtd.1 | 1.497 | 191  | 26  | 0.058 | 0.038 |
| PLEC1    | uc003zae.1 | 1.477 | 4153 | 233 | 0.057 | 0.039 |
| CD9      | uc001qmq.1 | 1.337 | 449  | 191 | 0.049 | 0.037 |
| CD9      | uc001qnp.1 | 1.265 | 450  | 207 | 0.049 | 0.039 |
| TAGLN2   | uc001fun.1 | 1.232 | 79   | 146 | 0.025 | 0.021 |
| PDIA6    | uc002rav.1 | 1.223 | 485  | 113 | 0.043 | 0.035 |
| C1orf204 | uc001fuh.1 | 1.198 | 248  | 33  | 0.036 | 0.030 |
| C1orf204 | uc001fuh.1 | 1.198 | 248  | 33  | 0.036 | 0.030 |

|        |             |       |      |     |       |       |
|--------|-------------|-------|------|-----|-------|-------|
| LRRC15 | uc003ftu.1  | 1.179 | 311  | 55  | 0.064 | 0.055 |
| ACOT7  | uc001amr.1  | 1.090 | 2144 | 38  | 0.057 | 0.053 |
| PHGDH  | uc001eib.1  | 1.078 | 232  | 25  | 0.043 | 0.040 |
| ZWILCH | uc002aqb.1  | 0.798 | 188  | 50  | 0.032 | 0.040 |
| KRT80  | uc001rzx.1  | 0.794 | 423  | 48  | 0.033 | 0.042 |
| KRT80  | uc001rzy.1  | 0.794 | 423  | 48  | 0.033 | 0.042 |
| ATP5A1 | uc002lbt.1  | 0.766 | 248  | 95  | 0.032 | 0.042 |
| ACOT7  | uc001amq.1  | 0.719 | 2115 | 38  | 0.057 | 0.079 |
| TGM3   | uc002wfx.2  | 0.680 | 441  | 25  | 0.054 | 0.080 |
| EIF2S3 | uc004dbc.1  | 0.660 | 97   | 32  | 0.021 | 0.031 |
| TGM1   | uc001wod.1  | 0.592 | 224  | 106 | 0.045 | 0.075 |
| KRT82  | uc001sai.1  | 0.553 | 152  | 42  | 0.079 | 0.143 |
| PLD3   | uc002onn.1  | 0.476 | 455  | 50  | 0.057 | 0.120 |
| ATG9B  | uc010lpv.1  | 0.297 | 768  | 48  | 0.025 | 0.083 |
| PDIA6  | uc002raw.1  | 0.277 | 682  | 27  | 0.041 | 0.148 |
| ACTA1  | uc001htrn.1 | 0.000 | 81   | 298 | 0.000 | 0.007 |

**Table S4.1**

**$R_s$  values for a list of genes whose proteins have been detected in modern hair shaft.**

We selected original gene accessions from Lee et al. [2006], filtering for genes showing sufficient sequence coverage.

| Gene     | UCSC                                                   | Cov(G) | Cov(PM) | Rs    |
|----------|--------------------------------------------------------|--------|---------|-------|
| MAP2K3   | uc002avv.1                                             | 1029   | 95      | 0.708 |
| CAPN9    | uc009xfq.1,uc001hua.1,uc001htz.1                       | 697    | 85      | 0.707 |
| IGSF9B   | uc001qgy.1                                             | 747    | 132     | 0.707 |
| MYH3     | uc002gmg.1                                             | 433    | 36      | 0.707 |
| RAB3IL1  | uc001nsp.1                                             | 784    | 41      | 0.706 |
| NFIC     | uc002lxq.1                                             | 1471   | 225     | 0.706 |
| KIAA0802 | uc010dkw.1                                             | 95     | 268     | 0.705 |
| LYSMD2   | uc002abj.1                                             | 335    | 236     | 0.704 |
| ATP6V1B1 | uc002shi.1,uc010fdv.1,uc002shj.1                       | 265    | 35      | 0.704 |
| FHAD1    | uc001awe.1                                             | 560    | 58      | 0.704 |
| SQSTM1   | uc003mkx.1,uc003mku.1                                  | 269    | 102     | 0.704 |
| CTBP1    | uc003gct.1                                             | 1674   | 152     | 0.704 |
| ACTN4    | uc002ojb.1                                             | 173    | 152     | 0.703 |
| PDE6B    | uc003gao.2,uc003gap.1                                  | 1649   | 132     | 0.703 |
| SLC11A1  | uc002vhw.1,uc002vhv.1                                  | 428    | 41      | 0.702 |
| PLEKHA7  | uc001mmn.1                                             | 363    | 34      | 0.702 |
| OSBPL5   | uc001lxi.1,uc009ydv.1                                  | 231    | 146     | 0.702 |
| ANKRD13D | uc001okh.1,uc001okq.1                                  | 188    | 113     | 0.701 |
| SCN3B    | uc001pzb.1,uc001pza.1                                  | 190    | 213     | 0.701 |
| TNR      | uc001gkp.1                                             | 458    | 37      | 0.700 |
| CST7     | uc002wtx.1                                             | 228    | 87      | 0.700 |
| GRIK4    | uc009zax.1                                             | 3407   | 86      | 0.698 |
| BNPI     | uc002pno.1                                             | 216    | 181     | 0.698 |
| TCP10L   | uc002vpw.2                                             | 147    | 57      | 0.698 |
| KIAA1855 | uc003our.2                                             | 143    | 133     | 0.698 |
| CNGA3    | uc010fij.1                                             | 323    | 25      | 0.697 |
| ZNF714   | uc002npl.2,uc010ecp.1,uc002npo.2                       | 106    | 59      | 0.696 |
| SIGLEC1  | uc002wiz.2,uc002wja.1                                  | 537    | 103     | 0.695 |
| MB       | uc003anz.1,uc003aoa.1                                  | 159    | 63      | 0.693 |
| PRG-3    | uc010mtc.1                                             | 150    | 26      | 0.693 |
| VAV2     | uc004cet.1                                             | 662    | 200     | 0.693 |
| DKFZp762 | uc002ivn.1                                             | 686    | 104     | 0.693 |
| NFKBID   | uc002zoch.1                                            | 104    | 108     | 0.692 |
| AMOTL2   | uc003eqe.1,uc003eqf.1                                  | 294    | 37      | 0.692 |
| vWF-CP   | uc004cdp.2                                             | 1536   | 43      | 0.691 |
| UPK1B    | uc003ecc.1                                             | 113    | 26      | 0.690 |
| SLC38A10 | uc002jzy.1                                             | 2553   | 165     | 0.689 |
| SLC22A2  | uc003qte.1,uc003qtf.1                                  | 272    | 125     | 0.689 |
| GPR56    | uc002emq.2                                             | 585    | 52      | 0.689 |
| MYH7B    | uc002xbi.1                                             | 1234   | 25      | 0.689 |
| CNKSR1   | uc009vsd.1,uc001bln.2,uc009vse.1,uc001blm.2            | 196    | 45      | 0.689 |
| ESF1     | uc002woj.1                                             | 213    | 110     | 0.689 |
| AACS     | uc009zvi.1                                             | 1081   | 60      | 0.688 |
| GSG1L    | uc010bxz.1                                             | 993    | 41      | 0.688 |
| TMPRSS13 | uc009yzz.1,uc001prt.1                                  | 288    | 54      | 0.687 |
| FAM60A   | uc001rke.1,uc001rkd.1,uc001rkb.1                       | 193    | 398     | 0.687 |
| RAB19    | uc010ini.1,uc003vvr.1                                  | 163    | 28      | 0.687 |
| FAM125B  | uc010mxd.1                                             | 2603   | 49      | 0.687 |
| ZNF57    | uc002lwr.1                                             | 151    | 166     | 0.687 |
| TDRD12   | uc002ntr.2,uc002ntq.2                                  | 483    | 300     | 0.686 |
| KBTBD5   | uc003clv.1                                             | 114    | 266     | 0.686 |
| FAS/ER   | uc010kit.1                                             | 341    | 26      | 0.686 |
| FAM107B  | uc001ina.1,uc001imx.1                                  | 1750   | 45      | 0.686 |
| ATCAY    | uc010dts.1                                             | 299    | 64      | 0.685 |
| PSMA8    | uc002kvr.1,uc002kvq.1,uc002kvp.1,uc002kvo.1            | 168    | 69      | 0.685 |
| ZFHX2    | uc010akq.1                                             | 104    | 61      | 0.684 |
| HEATR7B2 | uc003jmi.2                                             | 117    | 32      | 0.684 |
| XHRIP110 | uc003mff.1                                             | 169    | 33      | 0.683 |
| DLGAP3   | uc001byc.1                                             | 734    | 76      | 0.683 |
| NKX3-2   | uc003gmx.2                                             | 165    | 338     | 0.683 |
| C1orf177 | uc001cyb.2,uc001cya.2                                  | 221    | 96      | 0.683 |
| ZNF506   | uc002noh.2,uc010eci.1                                  | 152    | 83      | 0.683 |
| SLC39A4  | uc003zcq.1,uc003zco.1,uc003zcp.1                       | 334    | 243     | 0.682 |
| SLC22A7  | uc003ous.2,uc010jym.1,uc003out.1                       | 88     | 50      | 0.682 |
| C11orf52 | uc001pmh.1                                             | 113    | 77      | 0.681 |
| SMURF1   | uc003upt.1                                             | 364    | 62      | 0.681 |
| DPY30    | uc002rob.1,uc002roa.1                                  | 91     | 62      | 0.681 |
| AGT      | uc009xff.1,uc001hty.2,uc009xfe.1                       | 279    | 95      | 0.681 |
| TGM3     | uc002wfx.2                                             | 441    | 25      | 0.680 |
| NLRP3    | uc001ics.1,uc001icr.1,uc001icv.1,uc001icw.1,uc001icu.1 | 412    | 28      | 0.680 |
| PHLDB3   | uc010eit.1                                             | 287    | 65      | 0.679 |
| CEP192   | uc002krw.1                                             | 318    | 27      | 0.679 |
| GRK6     | uc003mgs.1                                             | 316    | 143     | 0.679 |
| hBSSP-4  | uc002crz.1                                             | 178    | 161     | 0.678 |
| PRSS22   | uc002cry.1                                             | 178    | 161     | 0.678 |
| KIAA1486 | uc002vof.1                                             | 326    | 182     | 0.678 |
| CDH26    | uc002vbg.1,uc002vbf.1                                  | 155    | 35      | 0.677 |
| DNMT3L   | uc002zsq.1,uc002zeh.1                                  | 676    | 109     | 0.677 |
| ZC3H14   | uc001xwz.1                                             | 193    | 28      | 0.677 |
| PRICKLE4 | uc003ore.1                                             | 263    | 89      | 0.677 |
| ABCB9    | uc001udr.2                                             | 461    | 120     | 0.677 |
| FLJ00133 | uc002wak.2                                             | 437    | 180     | 0.677 |
| KIAA0654 | uc002pmt.1                                             | 343    | 87      | 0.676 |
| RNF17    | uc001ups.1,uc001upr.1                                  | 302    | 84      | 0.675 |
| C17orf64 | uc002ivq.1                                             | 120    | 45      | 0.675 |
| FLJ00108 | uc003gcm.1                                             | 144    | 340     | 0.675 |
| LZTS1    | uc003wzr.1,uc010ltq.1                                  | 276    | 121     | 0.674 |
| MYT1     | uc002vih.2,uc002vij.1                                  | 1943   | 66      | 0.674 |
| BPIL3    | uc002wyl.1,uc002wyk.1                                  | 95     | 32      | 0.674 |
| PLXNB3   | uc004fil.1                                             | 668    | 72      | 0.674 |
| CACNA1H  | uc002ckv.1,uc010brj.1,uc002cku.1                       | 1058   | 344     | 0.674 |
| C1orf14  | uc001qpw.1,uc001qpv.1,uc001qpu.1                       | 201    | 203     | 0.673 |
| BMI1     | uc001irh.1                                             | 112    | 377     | 0.673 |

|           |                                                                   |      |     |       |
|-----------|-------------------------------------------------------------------|------|-----|-------|
| OBSL1     | uc010fwl.1                                                        | 485  | 147 | 0.671 |
| AZU1      | uc002lpz.1                                                        | 124  | 104 | 0.671 |
| HNMT      | uc002tvc.1                                                        | 97   | 26  | 0.670 |
| SLC34A1   | uc003mgk.2                                                        | 264  | 101 | 0.670 |
| BRD1      | uc003biv.1                                                        | 2446 | 186 | 0.669 |
| STK17B    | uc010fsh.1                                                        | 417  | 31  | 0.669 |
| GRHL3     | uc001biz.1,uc001biv.1                                             | 286  | 41  | 0.669 |
| SLC30A8   | uc010mcz.1                                                        | 615  | 121 | 0.669 |
| DKFZp586B | uc010dzy.1                                                        | 423  | 165 | 0.669 |
| CALCOCO2  | uc002iof.1                                                        | 169  | 113 | 0.669 |
| EIF2C1    | uc001bzk.1                                                        | 399  | 47  | 0.668 |
| KLHL31    | uc003pcb.2                                                        | 189  | 42  | 0.667 |
| DKFZp686E | uc001cpz.1                                                        | 225  | 25  | 0.667 |
| C4orf44   | uc003qqs.1,uc003qqt.1                                             | 266  | 228 | 0.667 |
| TMPRSS4   | uc001psd.2,uc009yzt.1                                             | 418  | 38  | 0.667 |
| PHKG1     | uc003trz.1                                                        | 257  | 38  | 0.665 |
| BC042092  | uc002bcv.2                                                        | 115  | 51  | 0.665 |
| IL34      | uc002ez.1,uc002ezh.1                                              | 262  | 134 | 0.665 |
| ARRDC2    | uc002nhv.1                                                        | 115  | 344 | 0.665 |
| RUNX3     | uc001bjr.1,uc009vrj.1,uc009vrk.1                                  | 1720 | 98  | 0.665 |
| TSNARE1   | uc003ywj.1                                                        | 5621 | 136 | 0.664 |
| ADRA1A    | uc010lum.1,uc003xfe.1,uc010lul.1,uc003xfc.1,uc003xfh.1,uc003xfq.1 | 338  | 204 | 0.664 |
| AK096230  | uc001ukq.1                                                        | 136  | 203 | 0.663 |
| NAV2      | uc009yhz.1                                                        | 407  | 30  | 0.663 |
| TOX2      | uc002xlq.1                                                        | 991  | 34  | 0.663 |
| INPP5D    | uc002vtw.1,uc002vtv.1                                             | 2060 | 115 | 0.663 |
| KIAA1075  | uc001sbo.1,uc001sbm.2                                             | 178  | 59  | 0.663 |
| FBXO46    | uc002pcv.1                                                        | 513  | 34  | 0.663 |
| GUCY1B2   | uc001vfd.2                                                        | 312  | 31  | 0.662 |
| BC132948  | uc002vym.1                                                        | 214  | 62  | 0.662 |
| ALS2CL    | uc003cpx.1                                                        | 139  | 46  | 0.662 |
| TP73      | uc001aks.2,uc009vlk.1,uc001akr.2                                  | 1315 | 105 | 0.662 |
| ANKRD24   | uc002lzt.2,uc002lzs.2                                             | 567  | 210 | 0.661 |
| WDR5      | uc004cez.1                                                        | 876  | 81  | 0.660 |
| UNC84B    | uc010gxs.1                                                        | 546  | 173 | 0.660 |
| EIF2S3    | uc004dbc.1                                                        | 97   | 32  | 0.660 |
| ACHE      | uc003uxd.1                                                        | 128  | 232 | 0.659 |
| DNAH6     | uc002soo.1                                                        | 88   | 29  | 0.659 |
| HSPA12B   | uc002wje.1,uc002wjd.1                                             | 781  | 196 | 0.659 |
| ITGA2B    | uc002igu.1                                                        | 186  | 49  | 0.659 |
| LOC285501 | uc010iru.1                                                        | 719  | 33  | 0.658 |
| PKD1L2    | uc002fqj.1,uc002fqh.1                                             | 753  | 45  | 0.657 |
| SV2B      | uc002bqv.1                                                        | 426  | 30  | 0.657 |
| GRK1      | uc001vua.1                                                        | 190  | 222 | 0.657 |
| EVL       | uc001yqv.1,uc001yqu.1                                             | 369  | 97  | 0.657 |
| NTN3      | uc002cqi.1                                                        | 140  | 368 | 0.657 |
| PRPF40B   | uc001rus.1,uc001rur.1                                             | 118  | 62  | 0.657 |
| CEL       | uc010naa.1                                                        | 265  | 29  | 0.657 |
| BIRC7     | uc002yei.1,uc002yej.1,uc010gkc.1                                  | 192  | 162 | 0.656 |
| P2RX1     | uc002fww.1                                                        | 425  | 82  | 0.656 |
| ATXN7L1   | uc003v dq.2,uc003vdf.1                                            | 187  | 92  | 0.656 |
| PGLYRP2   | uc002nbg.2,uc002nbf.2                                             | 313  | 41  | 0.655 |
| AQR       | uc001ziv.1                                                        | 379  | 73  | 0.655 |
| ACRC      | uc004eae.1                                                        | 134  | 117 | 0.655 |
| VRL       | uc002gpz.1                                                        | 280  | 50  | 0.655 |
| TRPV2     | uc002qpy.1                                                        | 280  | 50  | 0.655 |
| LG14      | uc002nxx.2,uc002nxz.1                                             | 381  | 95  | 0.655 |
| TEX14     | uc010dda.1,uc010dcz.1,uc002iws.1,uc002iwr.1                       | 1079 | 72  | 0.654 |
| SERPINA3  | uc001ydo.2                                                        | 286  | 34  | 0.654 |
| ARHGEF10  | uc010ire.1,uc003wpt.2                                             | 1828 | 74  | 0.653 |
| CAV3      | uc003brb.1,uc003bra.1                                             | 98   | 64  | 0.653 |
| EIF4G1    | uc003fny.2,uc003fnx.2                                             | 292  | 52  | 0.653 |
| S100Z     | uc003keq.2,uc003kep.1                                             | 291  | 38  | 0.653 |
| ACSL1     | uc003iww.1                                                        | 326  | 56  | 0.653 |
| SUT-1     | uc003vtc.1                                                        | 239  | 117 | 0.653 |
| RGS14     | uc003mqf.1,uc003mqi.1,uc003mqh.1                                  | 609  | 106 | 0.653 |
| DAGK1     | uc001sio.1                                                        | 124  | 97  | 0.652 |
| KIAA1549  | uc003yuk.2                                                        | 1053 | 70  | 0.651 |
| EYA2      | uc002xsn.1,uc002xso.1                                             | 1765 | 58  | 0.651 |
| FLJ00369  | uc002osc.2                                                        | 1461 | 100 | 0.650 |
| OAT4L     | uc009ypt.1                                                        | 154  | 89  | 0.650 |
| ADCK4     | uc002oop.1                                                        | 145  | 47  | 0.648 |
| TRXR2A    | uc002zqq.1                                                        | 211  | 117 | 0.647 |
| SLC27A5   | uc002qtc.1,uc010eus.1                                             | 295  | 106 | 0.647 |
| RHBDL2    | uc001ccu.1,uc001ccv.2                                             | 368  | 28  | 0.647 |
| MAP3K14   | uc002iiv.1,uc002iiu.1                                             | 533  | 47  | 0.647 |
| WISP1     | uc010med.1,uc010mec.1,uc010meb.1,uc003yuc.1,uc003yub.1            | 448  | 79  | 0.647 |
| TRAPPC9   | uc010mel.1                                                        | 6978 | 45  | 0.646 |
| ALDH1L1   | uc003eio.2,uc003ein.1                                             | 445  | 46  | 0.646 |
| LPHN3     | uc010ihh.1                                                        | 1115 | 36  | 0.646 |
| PTPRE     | uc001lkd.1                                                        | 819  | 47  | 0.646 |
| SHANK1    | uc002psx.1,uc002psw.1                                             | 2072 | 175 | 0.645 |
| EML2      | uc002pcq.1                                                        | 802  | 141 | 0.645 |
| ARC41     | uc003uqc.1                                                        | 495  | 58  | 0.644 |
| C14orf4   | uc001xsv.1                                                        | 239  | 462 | 0.644 |
| WFIKKN2   | uc002isv.2,uc010dbu.1                                             | 238  | 184 | 0.644 |
| PTK2B     | uc003xfr.1                                                        | 170  | 73  | 0.644 |
| FBXO47    | uc002hrc.1                                                        | 118  | 57  | 0.644 |
| CRYBB1    | uc003acy.1                                                        | 205  | 36  | 0.644 |
| TDRD1     | uc001lbf.2,uc001lbi.1,uc001lbi.1,uc001lbi.1,uc001lbi.1,uc001lbi.1 | 254  | 104 | 0.643 |
| TRPV4     | uc001tpj.1,uc001tpi.1,uc001tph.1,uc001tpq.1                       | 700  | 72  | 0.643 |
| TSSC6     | uc009ydk.1                                                        | 336  | 81  | 0.643 |
| PABPN1    | uc001wjj.2                                                        | 327  | 70  | 0.642 |
| FLJ00059  | uc003uuv.1                                                        | 221  | 81  | 0.641 |
| DKFZp434  | uc002qkq.1                                                        | 149  | 191 | 0.641 |
| ARPC4     | uc003btb.1,uc003bta.1,uc003bsz.1                                  | 126  | 121 | 0.640 |

|           |                                                                                                    |      |     |       |
|-----------|----------------------------------------------------------------------------------------------------|------|-----|-------|
| SERPINA6  | uc001ycv.1                                                                                         | 146  | 28  | 0.639 |
| ZNF507    | uc002nte.1,uc002ntd.1                                                                              | 169  | 108 | 0.639 |
| CES7      | uc002eip.1,uc002eio.1                                                                              | 155  | 33  | 0.639 |
| NLRP1     | uc010clh.1,uc002qcg.1,uc002qch.2,uc002qcl.1,uc002qci.1,uc002qck.1,uc002qci.1                       | 337  | 43  | 0.638 |
| PPF1A1    | uc001opr.1                                                                                         | 207  | 44  | 0.638 |
| RHBDF2    | uc002irs.1                                                                                         | 255  | 133 | 0.637 |
| PPP1R14D  | uc001zrm.1,uc001zmy.1                                                                              | 91   | 29  | 0.637 |
| BTBD2     | uc002luo.1                                                                                         | 290  | 231 | 0.637 |
| NBR1      | uc002idi.1,uc002idk.1                                                                              | 113  | 72  | 0.637 |
| WNK4      | uc002ibk.1                                                                                         | 117  | 205 | 0.637 |
| SSH1      | uc001tno.1                                                                                         | 201  | 48  | 0.637 |
| SERPINE2  | uc002vnt.1                                                                                         | 438  | 44  | 0.636 |
| KLK15     | uc002pto.1,uc002ptm.1,uc002ptn.1,uc002ptl.1                                                        | 170  | 48  | 0.635 |
| MUC17     | uc003uxp.1                                                                                         | 255  | 54  | 0.635 |
| ANO1      | uc001opk.1                                                                                         | 2126 | 98  | 0.635 |
| IL2RA     | uc009xih.1,uc001iiz.1                                                                              | 358  | 31  | 0.635 |
| RAPGEF1   | uc010mzm.1,uc010mzl.1,uc010mzs.1,uc010mzr.1,uc010mza.1,uc010mzp.1,uc010mzo.1,uc010mzn.1,uc004cbc.1 | 540  | 75  | 0.635 |
| CERCAM    | uc004buy.1,uc010mya.1                                                                              | 706  | 56  | 0.635 |
| C21orf56  | uc002zii.1                                                                                         | 763  | 175 | 0.634 |
| TIMM50    | uc002olv.1                                                                                         | 101  | 64  | 0.634 |
| DPEP2     | uc002eve.1                                                                                         | 232  | 49  | 0.634 |
| INPP5A    | uc001llq.1                                                                                         | 8836 | 173 | 0.633 |
| ZNF236    | uc002lmi.1                                                                                         | 1840 | 96  | 0.633 |
| HYDIN2    | uc002ezs.1                                                                                         | 294  | 143 | 0.632 |
| BC061638  | uc009zrx.1                                                                                         | 399  | 63  | 0.632 |
| TJP3      | uc002lyk.1                                                                                         | 1065 | 82  | 0.631 |
| CAMLG     | uc003kzu.1,uc003kzt.1                                                                              | 99   | 125 | 0.631 |
| ERCC1     | uc002pbu.1                                                                                         | 2160 | 47  | 0.631 |
| KIAA1618  | uc002iyq.1                                                                                         | 831  | 121 | 0.631 |
| SMCR7L    | uc003axw.2                                                                                         | 333  | 45  | 0.631 |
| ZFHx4     | uc003yaw.1                                                                                         | 434  | 57  | 0.630 |
| MYOC      | uc001qhu.1                                                                                         | 108  | 34  | 0.630 |
| ZMI22     | uc003tts.1,uc003ttt.1                                                                              | 365  | 53  | 0.629 |
| TMEM111   | uc003buc.2,uc003bun.1                                                                              | 97   | 61  | 0.629 |
| GPR77     | uc010ela.1                                                                                         | 210  | 48  | 0.629 |
| PDE4A     | uc002moo.2                                                                                         | 258  | 54  | 0.628 |
| TINAGL1   | uc001bta.1                                                                                         | 228  | 91  | 0.627 |
| TGFBRAP1  | uc010fjc.1                                                                                         | 287  | 36  | 0.627 |
| HNRNPA1L  | uc001vqz.1,uc001vqy.1,uc001vqx.1                                                                   | 83   | 52  | 0.627 |
| ELFN1     | uc010ksq.1                                                                                         | 224  | 421 | 0.626 |
| DKFZp434  | uc002kdv.2                                                                                         | 895  | 58  | 0.626 |
| KIAA2034  | uc010env.1                                                                                         | 623  | 65  | 0.626 |
| ZBTB46    | uc002vqv.1                                                                                         | 2998 | 113 | 0.626 |
| HDLBP     | uc002wbb.1                                                                                         | 597  | 70  | 0.625 |
| F7        | uc001vsw.1,uc001vsv.1,uc010agp.1                                                                   | 1037 | 108 | 0.625 |
| PPP1R16A  | uc003zdf.1,uc003zdd.1                                                                              | 429  | 119 | 0.624 |
| ILDR1     | uc003eee.1                                                                                         | 152  | 43  | 0.622 |
| CDH23     | uc001jsc.1,uc001jsi.2,uc001jsh.2,uc001jsg.2                                                        | 617  | 36  | 0.622 |
| LRFN1     | uc002okw.2                                                                                         | 423  | 374 | 0.622 |
| MYL6B     | uc001sit.1,uc001sis.1                                                                              | 111  | 69  | 0.622 |
| FAM30A    | uc001ysr.2,uc001ysq.2                                                                              | 656  | 94  | 0.621 |
| FHOD3     | uc010dmz.1                                                                                         | 1242 | 34  | 0.621 |
| TFAP2C    | uc002xya.1                                                                                         | 139  | 431 | 0.620 |
| CUX2      | uc001tsb.1                                                                                         | 2520 | 62  | 0.620 |
| KIAA1669  | uc003bka.1                                                                                         | 283  | 193 | 0.620 |
| UNC84A    | uc003sji.1                                                                                         | 836  | 88  | 0.620 |
| GALNAC4S  | uc001lhl.1                                                                                         | 850  | 86  | 0.620 |
| TRIM63    | uc001bli.1                                                                                         | 92   | 38  | 0.620 |
| FLJ00074  | uc001bbd.1                                                                                         | 143  | 59  | 0.619 |
| hSK4      | uc010eiz.1                                                                                         | 160  | 173 | 0.618 |
| KCNE3     | uc001ovc.1                                                                                         | 75   | 139 | 0.618 |
| UNQ830    | uc002vtr.1                                                                                         | 291  | 147 | 0.617 |
| GIP       | uc002iol.1                                                                                         | 81   | 30  | 0.617 |
| KCNIP3    | uc002sup.1                                                                                         | 2094 | 34  | 0.617 |
| HPN       | uc002nxt.1                                                                                         | 386  | 35  | 0.617 |
| C5orf38   | uc003jdc.1                                                                                         | 132  | 244 | 0.616 |
| SRCRB4D   | uc003ufb.1                                                                                         | 607  | 34  | 0.616 |
| AK128833  | uc001acx.1                                                                                         | 190  | 156 | 0.616 |
| LRIT1     | uc001kcz.1                                                                                         | 156  | 32  | 0.615 |
| IGnT2     | uc010jol.1                                                                                         | 547  | 42  | 0.614 |
| GMEB2     | uc002vfp.1                                                                                         | 1133 | 114 | 0.613 |
| DBN1      | uc003mgz.1                                                                                         | 297  | 238 | 0.613 |
| FGFR2     | uc009xzs.1,uc009xzz.1                                                                              | 809  | 55  | 0.612 |
| C11orf41  | uc001mun.1,uc001mup.2                                                                              | 352  | 38  | 0.612 |
| C7orf25   | uc010kxr.1                                                                                         | 242  | 74  | 0.612 |
| LRRC24    | uc003zdn.1,uc003zdm.1                                                                              | 495  | 528 | 0.610 |
| C19orf54  | uc002oou.1,uc002oov.1                                                                              | 186  | 34  | 0.609 |
| CRYBA4    | uc003acz.2                                                                                         | 104  | 38  | 0.609 |
| KCNIP2    | uc009xwv.1,uc009xwu.1,uc001kuf.1,uc001kue.1,uc001kud.1,uc001kuc.1,uc001kub.1,uc001kuq.1            | 479  | 136 | 0.608 |
| KCHIP2    | uc001kua.1                                                                                         | 479  | 136 | 0.608 |
| KLF17     | uc001clp.1                                                                                         | 102  | 62  | 0.608 |
| RPL3L     | uc002cnh.1                                                                                         | 264  | 126 | 0.607 |
| C14orf73  | uc001ymk.1                                                                                         | 851  | 86  | 0.606 |
| BC026998  | uc002gte.2                                                                                         | 179  | 31  | 0.606 |
| SERPINB6  | uc003muk.1                                                                                         | 245  | 27  | 0.606 |
| ACTG2     | uc010fev.1,uc002sjw.1                                                                              | 132  | 40  | 0.606 |
| MED1      | uc002hrv.2,uc002hrv.2                                                                              | 352  | 64  | 0.606 |
| ZCCHC8    | uc009zqx.1,uc009zxp.1                                                                              | 165  | 25  | 0.606 |
| FOSL1     | uc001oqq.1                                                                                         | 85   | 309 | 0.606 |
| SLC22A6   | uc001nwm.1,uc001nwl.1,uc001nwj.1,uc001nwk.1                                                        | 97   | 47  | 0.606 |
| MMP9      | uc002xqz.1                                                                                         | 366  | 133 | 0.606 |
| UROC1     | uc010hsi.1,uc003eiz.1                                                                              | 814  | 56  | 0.605 |
| LOC645545 | uc010ddb.1                                                                                         | 333  | 72  | 0.605 |
| KLHL30    | uc002vvr.1                                                                                         | 566  | 224 | 0.604 |
| AMBP      | uc004bie.2                                                                                         | 149  | 72  | 0.604 |
| GLIS3     | uc003zhy.1,uc003zic.1,uc003zhz.1                                                                   | 782  | 217 | 0.604 |

|           |                                                                                         |      |     |       |
|-----------|-----------------------------------------------------------------------------------------|------|-----|-------|
| GCNT7     | uc002xxw.2                                                                              | 418  | 28  | 0.603 |
| ZNF709    | uc002mtx.2,uc002mtw.2                                                                   | 777  | 104 | 0.602 |
| PLOD3     | uc010lhs.1                                                                              | 269  | 162 | 0.602 |
| FOXRED1   | uc001qdk.1                                                                              | 123  | 37  | 0.602 |
| HAL       | uc001tem.1                                                                              | 131  | 90  | 0.601 |
| GALNTL2   | uc003car.2                                                                              | 366  | 33  | 0.601 |
| PCDHGB4   | uc003lkc.1                                                                              | 2845 | 115 | 0.601 |
| P/OKcl.13 | uc010mrd.1                                                                              | 429  | 106 | 0.600 |
| C1orf167  | uc001ata.2                                                                              | 170  | 51  | 0.600 |
| MUC20     | uc010hzo.1                                                                              | 316  | 54  | 0.598 |
| NOD27     | uc002ekp.1                                                                              | 328  | 49  | 0.598 |
| LOXL3     | uc010ffm.1,uc010ffn.1,uc002smq.1,uc002smp.1                                             | 375  | 64  | 0.597 |
| BARHL1    | uc004cbp.1                                                                              | 447  | 160 | 0.597 |
| NLGN3     | uc004dzd.1                                                                              | 114  | 51  | 0.596 |
| KIAA0134  | uc002pgm.1                                                                              | 150  | 161 | 0.596 |
| SOHLH2    | uc001uvi.1                                                                              | 108  | 161 | 0.596 |
| KIAA0999  | uc001ppw.1                                                                              | 143  | 31  | 0.596 |
| EML1      | uc010avt.1                                                                              | 2293 | 135 | 0.596 |
| FLJ00009  | uc003uwu.1,uc003uws.1                                                                   | 292  | 87  | 0.596 |
| FLJ00100  | uc003uwt.1                                                                              | 292  | 87  | 0.596 |
| NLRP5     | uc002qmi.1,uc002qmi.1                                                                   | 698  | 43  | 0.596 |
| GLTSCR1   | uc002phi.2                                                                              | 1133 | 428 | 0.595 |
| GABRB3    | uc001zbb.1                                                                              | 3074 | 29  | 0.594 |
| TET3      | uc002skb.2,uc010fez.1                                                                   | 691  | 112 | 0.594 |
| PHF12     | uc002hdh.1                                                                              | 175  | 26  | 0.594 |
| C12orf34  | uc001tpf.1                                                                              | 702  | 61  | 0.594 |
| SYDE1     | uc002nai.1                                                                              | 221  | 223 | 0.594 |
| HIP1R     | uc001udk.1                                                                              | 252  | 184 | 0.593 |
| SLC41A3   | uc003eii.1                                                                              | 492  | 56  | 0.592 |
| SEMA5B    | uc003egb.1                                                                              | 1301 | 56  | 0.592 |
| P2X       | uc010ckm.1                                                                              | 194  | 82  | 0.592 |
| PLA2G2F   | uc009vpp.1                                                                              | 142  | 36  | 0.592 |
| TGM1      | uc001wod.1                                                                              | 224  | 106 | 0.592 |
| PCDHGA5   | uc003lju.1                                                                              | 3468 | 144 | 0.591 |
| ABCA13    | uc010kyu.1                                                                              | 430  | 186 | 0.590 |
| STK24     | uc001vnm.1                                                                              | 1201 | 59  | 0.590 |
| DHX33     | uc002gbz.1                                                                              | 190  | 42  | 0.589 |
| AZGP1     | uc003ush.1                                                                              | 112  | 33  | 0.589 |
| SERPIND1  | uc002ztc.1                                                                              | 84   | 33  | 0.589 |
| DKFZp313K | uc002jew.2                                                                              | 280  | 33  | 0.589 |
| ATXN7L3   | uc002iga.1,uc002ifz.1                                                                   | 87   | 64  | 0.589 |
| DUSP22    | uc003msv.1                                                                              | 1047 | 88  | 0.588 |
| IL27      | uc002dq.1                                                                               | 153  | 54  | 0.588 |
| TBL1X     | uc004css.1                                                                              | 398  | 26  | 0.588 |
| FLJ00010  | uc003uwr.1                                                                              | 326  | 87  | 0.587 |
| PCDHGB7   | uc003lkn.1                                                                              | 1961 | 157 | 0.587 |
| KIAA1274  | uc001jre.2                                                                              | 486  | 95  | 0.586 |
| TCRBV2S1  | uc003vzp.2                                                                              | 765  | 46  | 0.586 |
| TNFRSF18  | uc001add.1,uc001adc.1,uc001adb.1                                                        | 95   | 167 | 0.586 |
| HRIHFB200 | uc001avr.2                                                                              | 1494 | 35  | 0.586 |
| BEND7     | uc001imo.2,uc001imm.2                                                                   | 563  | 26  | 0.585 |
| SIX3      | uc002run.1                                                                              | 103  | 241 | 0.585 |
| TCL6      | uc001yev.1,uc001yeu.1                                                                   | 106  | 31  | 0.585 |
| KIAA0447  | uc001ahe.2                                                                              | 118  | 69  | 0.585 |
| SLC24A6   | uc001tvb.1                                                                              | 344  | 86  | 0.583 |
| RILPL1    | uc001ufd.1                                                                              | 944  | 55  | 0.583 |
| RDH10     | uc003xzi.1                                                                              | 103  | 30  | 0.583 |
| BV13S6J2. | uc010lnu.1                                                                              | 103  | 30  | 0.583 |
| NSUN4     | uc009vyq.1,uc009vyf.1,uc001cpr.1                                                        | 146  | 85  | 0.582 |
| SP6       | uc002imq.1                                                                              | 232  | 135 | 0.582 |
| Cap43     | uc003yue.1                                                                              | 165  | 48  | 0.582 |
| ADCY6     | uc001rsh.2                                                                              | 252  | 213 | 0.581 |
| SLC23A1   | uc003leh.1,uc003leq.1                                                                   | 269  | 78  | 0.580 |
| IIP45     | uc009vni.1                                                                              | 161  | 35  | 0.580 |
| MID1      | uc004cub.1,uc010ndy.1,uc004ctw.2,uc004ctu.2,uc004ctu.2,uc004cto.1,uc004ctn.1,uc004ctm.1 | 88   | 34  | 0.580 |
| SPDYA     | uc002rmk.1,uc002rmi.1                                                                   | 99   | 172 | 0.579 |
| WDR85     | uc004cni.1,uc010ncl.1                                                                   | 188  | 79  | 0.578 |
| C10orf71  | uc001jhp.1                                                                              | 395  | 57  | 0.577 |
| CSK       | uc010bkc.1                                                                              | 156  | 120 | 0.577 |
| RLTPR     | uc002etn.1,uc010cel.1                                                                   | 831  | 213 | 0.577 |
| GALNT6    | uc001ryk.1                                                                              | 336  | 31  | 0.577 |
| SULT4A1   | uc003bed.1                                                                              | 642  | 167 | 0.576 |
| AMH       | uc002lvh.2                                                                              | 288  | 199 | 0.576 |
| JSRP1     | uc002lvi.1,uc002lvj.1                                                                   | 211  | 182 | 0.575 |
| KCTD1     | uc002kvv.1                                                                              | 1706 | 40  | 0.574 |
| RNF165    | uc002lby.1                                                                              | 1805 | 37  | 0.574 |
| CLDN10    | uc001vmg.1                                                                              | 921  | 48  | 0.573 |
| FX1       | uc004cty.2                                                                              | 89   | 34  | 0.573 |
| LOC389827 | uc004ceh.1                                                                              | 288  | 60  | 0.573 |
| R3HDML    | uc002xls.1                                                                              | 110  | 63  | 0.573 |
| PHAX      | uc003kua.1                                                                              | 154  | 147 | 0.573 |
| PRSS35    | uc010kbn.1,uc003pjz.1                                                                   | 77   | 44  | 0.571 |
| ITIH3     | uc003dfv.2                                                                              | 217  | 62  | 0.571 |
| KLK9      | uc010eol.1,uc002pux.1                                                                   | 168  | 60  | 0.571 |
| FGF6      | uc001qmr.1                                                                              | 103  | 98  | 0.571 |
| OVCH1     | uc001rix.1                                                                              | 137  | 65  | 0.569 |
| CACNA1A   | uc002mwx.2                                                                              | 1480 | 41  | 0.568 |
| CHRNE     | uc002fzk.1                                                                              | 295  | 195 | 0.567 |
| C11orf2   | uc001ocs.1                                                                              | 139  | 328 | 0.566 |
| CCDC144N  | uc002qvf.1                                                                              | 106  | 36  | 0.566 |
| GPRC5C    | uc002jkt.2,uc002jks.1                                                                   | 244  | 113 | 0.566 |
| DYRK4     | uc009zeh.1                                                                              | 277  | 57  | 0.566 |
| RHOBTB2   | uc003xcp.1                                                                              | 792  | 28  | 0.566 |
| DMRTC2    | uc002orr.1,uc002ors.1                                                                   | 87   | 131 | 0.565 |
| C8orf82   | uc003zdd.1                                                                              | 163  | 674 | 0.564 |
| MGC70857  | uc003zdp.1                                                                              | 163  | 674 | 0.564 |

|           |                                             |      |     |       |
|-----------|---------------------------------------------|------|-----|-------|
| PTCHD2    | uc001asi.1                                  | 235  | 176 | 0.562 |
| SLC6A18   | uc003jby.1                                  | 792  | 176 | 0.561 |
| UNQ5783   | uc010clb.1                                  | 209  | 44  | 0.561 |
| C17orf87  | uc002qbh.2,uc002qbi.2                       | 209  | 44  | 0.561 |
| GPLD1     | uc010jpr.1                                  | 181  | 29  | 0.561 |
| ZNF556    | uc002lwg.2,uc002lwp.1                       | 107  | 96  | 0.561 |
| AK308669  | uc010jvk.1                                  | 778  | 64  | 0.559 |
| SCN5A     | uc010hhi.1                                  | 595  | 38  | 0.559 |
| LOC126520 | uc010dsm.1                                  | 153  | 122 | 0.558 |
| LDLRAD1   | uc001cwm.1                                  | 121  | 27  | 0.558 |
| CLDN18    | uc003ero.1                                  | 212  | 59  | 0.557 |
| RBP3      | uc001jez.1                                  | 179  | 224 | 0.556 |
| RBMY1F    | uc004fvd.1                                  | 96   | 32  | 0.556 |
| DKFZp434P | uc001iry.2                                  | 1120 | 68  | 0.555 |
| ABCC5     | uc010hxl.1                                  | 1014 | 25  | 0.555 |
| MYL2      | uc001try.2                                  | 92   | 51  | 0.554 |
| PTPRH     | uc002qjs.1,uc010esv.1,uc002qjq.1            | 199  | 49  | 0.554 |
| OLFML2A   | uc004bow.1                                  | 295  | 35  | 0.554 |
| MYO7B     | uc002top.1                                  | 1949 | 49  | 0.553 |
| ASB2      | uc001ycc.1                                  | 660  | 73  | 0.553 |
| KIAA1812  | uc001irz.2                                  | 1669 | 68  | 0.553 |
| KRT82     | uc001sai.1                                  | 152  | 42  | 0.553 |
| MGAT5B    | uc002iti.1                                  | 77   | 117 | 0.553 |
| KvLQT1    | uc009ydp.1                                  | 6354 | 97  | 0.552 |
| IP6K3     | uc010jvr.1,uc003ofb.1                       | 450  | 54  | 0.552 |
| KIAA0772  | uc002ycm.1                                  | 212  | 117 | 0.552 |
| VWF       | uc001qno.1,uc001qnn.1                       | 237  | 28  | 0.551 |
| C13orf26  | uc001uti.1                                  | 118  | 78  | 0.551 |
| GRK7      | uc003euf.1                                  | 358  | 91  | 0.551 |
| LRIG1     | uc003dmw.1                                  | 361  | 106 | 0.551 |
| MAGIX     | uc004dmt.2,uc010nio.1,uc010nin.1,uc004dmu.2 | 114  | 94  | 0.550 |
| LAIR1     | uc002qfn.1,uc002qfm.1,uc002qfi.1,uc002qfk.1 | 141  | 43  | 0.549 |
| C14orf115 | uc001xpw.2                                  | 257  | 78  | 0.546 |
| C2orf84   | uc002rfc.1                                  | 76   | 166 | 0.546 |
| NAIF1     | uc004bta.1                                  | 100  | 150 | 0.545 |
| ADCYAP1R  | uc003tce.1,uc003tcd.1,uc003tcc.1            | 470  | 32  | 0.545 |
| C10orf141 | uc009yap.1,uc001lju.1                       | 316  | 132 | 0.543 |
| A1BG      | uc002qsd.2                                  | 490  | 133 | 0.543 |
| TRIM7     | uc003mmv.1                                  | 291  | 42  | 0.541 |
| CATSPER2  | uc001zsj.1,uc001zsi.1,uc001zsh.1            | 91   | 160 | 0.541 |
| TBR1      | uc002ubw.1                                  | 416  | 75  | 0.541 |
| CLDN14    | uc002vvo.1                                  | 1535 | 30  | 0.541 |
| MORC1     | uc003dxi.1                                  | 272  | 105 | 0.540 |
| PCDHA8    | uc003lhs.1                                  | 2194 | 60  | 0.540 |
| ITGAE     | uc002fwo.2                                  | 1567 | 65  | 0.539 |
| CD247     | uc001qei.2,uc001qei.2,uc001qek.2            | 1062 | 88  | 0.539 |
| KIAA1267  | uc002ikb.1                                  | 672  | 35  | 0.538 |
| DNAJB13   | uc001ouo.1                                  | 302  | 25  | 0.538 |
| MEGF5     | uc003mac.1                                  | 679  | 76  | 0.537 |
| PLA2G5    | uc001bcx.1                                  | 252  | 29  | 0.537 |
| EBI3      | uc002lzu.1                                  | 136  | 73  | 0.537 |
| IQCA1     | uc002vwb.1                                  | 988  | 50  | 0.536 |
| GTF2A1L   | uc002nwt.1,uc002rws.1                       | 214  | 51  | 0.536 |
| MX2       | uc002yzf.1,uc002yzg.1,uc010gop.1            | 784  | 72  | 0.536 |
| POLR1A    | uc002sqt.1                                  | 127  | 34  | 0.535 |
| NRG1      | uc010lvt.1,uc003xiy.1                       | 188  | 67  | 0.535 |
| TUSC5     | uc002fsi.1                                  | 449  | 120 | 0.535 |
| TM9SF4    | uc010gdz.1                                  | 292  | 104 | 0.534 |
| AMFR      | uc002eix.1                                  | 278  | 33  | 0.534 |
| PAX1      | uc002wsi.2                                  | 299  | 319 | 0.533 |
| TM4SF5    | uc002fyw.1                                  | 197  | 30  | 0.533 |
| TKT       | uc003dqp.1                                  | 84   | 67  | 0.532 |
| ATP2C2    | uc002fhv.1                                  | 1357 | 48  | 0.531 |
| ABHD12B   | uc001wys.1,uc001wyr.1,uc001wyq.1            | 133  | 141 | 0.530 |
| UBE2O     | uc002jrl.2                                  | 316  | 134 | 0.530 |
| ANKS6     | uc004ayw.1                                  | 416  | 42  | 0.530 |
| GCLC      | uc003pbx.1                                  | 117  | 248 | 0.530 |
| DKFZp686  | uc003mjq.1                                  | 102  | 126 | 0.529 |
| DUS1L     | uc002kdp.1                                  | 241  | 153 | 0.529 |
| SLC25A31  | uc003ifl.1                                  | 84   | 211 | 0.529 |
| LRFN4     | uc001oir.1,uc001ojs.2                       | 108  | 533 | 0.529 |
| BEST2     | uc002mux.1                                  | 275  | 67  | 0.528 |
| TRAF3IP3  | uc009xcr.1                                  | 108  | 38  | 0.528 |
| C11orf9   | uc001nse.1                                  | 1002 | 94  | 0.528 |
| KIAA1234  | uc003jaz.1,uc003jax.1                       | 173  | 73  | 0.527 |
| TNPO2     | uc002muo.1                                  | 402  | 53  | 0.527 |
| JMJD5     | uc010bxw.1                                  | 202  | 76  | 0.527 |
| SASH3     | uc004euu.1                                  | 142  | 32  | 0.526 |
| TOP3A     | uc002qsw.1,uc010cpz.1                       | 331  | 29  | 0.526 |
| ZHX3      | uc010qqg.1                                  | 165  | 52  | 0.525 |
| PCDHA5    | uc003lhk.1,uc003lhl.1                       | 2686 | 173 | 0.525 |
| SAMM50    | uc003bek.1                                  | 445  | 112 | 0.524 |
| SERPINF1  | uc010cjw.1,uc002ftl.1                       | 316  | 69  | 0.524 |
| DAO       | uc001tnr.2                                  | 215  | 45  | 0.523 |
| CAPN8     | uc009xee.1                                  | 474  | 32  | 0.523 |
| SLC25A24  | uc001dvm.1                                  | 112  | 78  | 0.522 |
| VESPR     | uc009zsv.1                                  | 272  | 71  | 0.522 |
| LOC91948  | uc002buh.1                                  | 431  | 27  | 0.522 |
| KIAA1835  | uc010qyk.1,uc003azr.1                       | 307  | 59  | 0.522 |
| AK125726  | uc003elh.1                                  | 326  | 34  | 0.521 |
| KCNQ1     | uc001lwo.1                                  | 8533 | 97  | 0.521 |
| SPNS3     | uc002fxv.1                                  | 613  | 33  | 0.520 |
| ZNF564    | uc002mty.1                                  | 150  | 104 | 0.520 |
| CAPZB     | uc001bcd.1                                  | 1143 | 27  | 0.520 |
| TSGA10IP  | uc001oqk.1                                  | 179  | 93  | 0.520 |
| LLGL2     | uc010dqq.1                                  | 1449 | 43  | 0.519 |



|           |                                                                                                                                                                      |      |     |       |
|-----------|----------------------------------------------------------------------------------------------------------------------------------------------------------------------|------|-----|-------|
| AK310432  | uc009vll.1                                                                                                                                                           | 259  | 96  | 0.519 |
| TUB       | uc001mfy.1                                                                                                                                                           | 871  | 43  | 0.518 |
| CMIP      | uc002fq.1                                                                                                                                                            | 4964 | 63  | 0.518 |
| SPTBN5    | uc001zos.1                                                                                                                                                           | 1589 | 95  | 0.518 |
| NKX6-3    | uc010lxa.1                                                                                                                                                           | 3067 | 62  | 0.518 |
| FLJ00275  | uc002qfa.1                                                                                                                                                           | 118  | 61  | 0.517 |
| CD4       | uc009zfc.1,uc001qqv.1,uc009zez.1                                                                                                                                     | 260  | 48  | 0.517 |
| PDCD7     | uc002aol.1                                                                                                                                                           | 89   | 276 | 0.517 |
| AML2      | uc009vri.1                                                                                                                                                           | 946  | 118 | 0.517 |
| TMEM108   | uc003epm.1                                                                                                                                                           | 91   | 94  | 0.516 |
| KIAA0702  | uc002apq.1,uc010bhm.1                                                                                                                                                | 194  | 25  | 0.515 |
| TMEM110   | uc003dgb.2                                                                                                                                                           | 114  | 47  | 0.515 |
| SLC26A9   | uc001hdo.1                                                                                                                                                           | 198  | 68  | 0.515 |
| C7orf27   | uc003smh.2                                                                                                                                                           | 188  | 172 | 0.515 |
| EPN3      | uc002irb.2                                                                                                                                                           | 273  | 158 | 0.514 |
| UHRF1BP1  | uc001tqp.1                                                                                                                                                           | 177  | 26  | 0.514 |
| PEBP4     | uc003xcn.1                                                                                                                                                           | 2579 | 32  | 0.513 |
| PHOX2A    | uc001osh.2                                                                                                                                                           | 285  | 219 | 0.512 |
| RASGRP4   | uc010egb.1,uc002oir.2                                                                                                                                                | 293  | 50  | 0.512 |
| SLC18A1   | uc003wzl.1                                                                                                                                                           | 127  | 26  | 0.512 |
| PARP14    | uc003efr.1                                                                                                                                                           | 127  | 26  | 0.512 |
| CHRND     | uc010fvc.1,uc002vsw.1                                                                                                                                                | 191  | 76  | 0.512 |
| FKSG71    | uc009xqt.1                                                                                                                                                           | 88   | 30  | 0.511 |
| PLA2G12B  | uc001jtf.1                                                                                                                                                           | 88   | 30  | 0.511 |
| NLRP7     | uc010esk.1,uc002qih.2,uc002qii.2,uc002qiq.2                                                                                                                          | 356  | 39  | 0.511 |
| VGLL2     | uc003pxo.1,uc003pxn.1                                                                                                                                                | 270  | 138 | 0.511 |
| AFAP1L1   | uc003lqi.1                                                                                                                                                           | 184  | 47  | 0.511 |
| C4orf29   | uc010inz.1,uc003ifu.1,uc003ifv.2,uc003ift.2                                                                                                                          | 94   | 32  | 0.511 |
| CTCF      | uc010gjj.1,uc010gjf.1,uc010gje.1,uc010ggy.1,uc010giz.1,uc002xym.2,uc010giw.1,uc010gja.1,uc010gjd.1,uc010gjb.1,uc010gjc.1,uc010gix.1,uc010gji.1,uc010gjj.1,uc010gjh.1 | 300  | 181 | 0.511 |
| FAM107A   | uc003dko.1                                                                                                                                                           | 635  | 54  | 0.510 |
| TRIM2     | uc003inh.1                                                                                                                                                           | 961  | 28  | 0.510 |
| CARM1     | uc002mq.1                                                                                                                                                            | 357  | 156 | 0.510 |
| CD226     | uc002lkm.2                                                                                                                                                           | 365  | 31  | 0.510 |
| BPI       | uc002xib.2                                                                                                                                                           | 242  | 46  | 0.507 |
| PCDHGA1   | uc003lji.1                                                                                                                                                           | 4289 | 54  | 0.507 |
| ASAP3     | uc001bhb.2                                                                                                                                                           | 150  | 57  | 0.507 |
| SPATA16   | uc003fin.2                                                                                                                                                           | 545  | 46  | 0.506 |
| MEGF2     | uc010hkf.1                                                                                                                                                           | 177  | 64  | 0.506 |
| FSCN2     | uc002kan.1,uc002kam.1                                                                                                                                                | 220  | 289 | 0.505 |
| AK094715  | uc003pta.1                                                                                                                                                           | 126  | 53  | 0.505 |
| BIN2      | uc001ryh.1,uc009ziz.1,uc001ryq.1                                                                                                                                     | 248  | 143 | 0.505 |
| CAMTA2    | uc010ckv.1                                                                                                                                                           | 111  | 35  | 0.505 |
| LILRB5    | uc002qez.1,uc002qey.1,uc002qex.1                                                                                                                                     | 119  | 60  | 0.504 |
| GATA4     | uc003wub.1                                                                                                                                                           | 2101 | 45  | 0.503 |
| PRSS16    | uc003njb.1,uc003nja.1                                                                                                                                                | 163  | 41  | 0.503 |
| NCF4      | uc003apz.2,uc003apy.2                                                                                                                                                | 281  | 77  | 0.502 |
| FCGBP     | uc002omp.2                                                                                                                                                           | 1130 | 36  | 0.502 |
| NKX6-1    | uc003hpa.1                                                                                                                                                           | 75   | 301 | 0.502 |
| BAZ2A     | uc009zov.1                                                                                                                                                           | 101  | 38  | 0.502 |
| DKFZp434B | uc003qcx.1                                                                                                                                                           | 224  | 159 | 0.501 |
| KIAA0467  | uc001cjk.1,uc001cjl.1                                                                                                                                                | 499  | 40  | 0.501 |
| HRIHFB200 | uc010kvi.1                                                                                                                                                           | 263  | 94  | 0.500 |
| MS4A10    | uc001npz.1                                                                                                                                                           | 135  | 45  | 0.500 |
| PTPRU     | uc001brx.1                                                                                                                                                           | 88   | 44  | 0.500 |
| NM_001001 | uc002yxh.1                                                                                                                                                           | 390  | 30  | 0.500 |
| EPAS1     | uc002ruw.1                                                                                                                                                           | 78   | 39  | 0.500 |
| BCR-ABL   | uc010gtx.1                                                                                                                                                           | 900  | 88  | 0.500 |
| BSPH1     | uc002phs.1                                                                                                                                                           | 107  | 32  | 0.498 |
| SH2D3C    | uc004bsc.1,uc004brz.2                                                                                                                                                | 1213 | 93  | 0.498 |
| IFNGR2    | uc002yrr.2                                                                                                                                                           | 259  | 43  | 0.498 |
| ZNF718    | uc003fzt.2                                                                                                                                                           | 621  | 581 | 0.497 |
| SLC6A19   | uc003jbw.2                                                                                                                                                           | 1026 | 144 | 0.496 |
| MEFV      | uc002cun.1                                                                                                                                                           | 236  | 65  | 0.496 |
| COLQ      | uc003bzy.1                                                                                                                                                           | 353  | 25  | 0.496 |
| KCNN4     | uc002oxl.1                                                                                                                                                           | 386  | 51  | 0.495 |
| SLC25A19  | uc002ins.2,uc010dqe.1                                                                                                                                                | 231  | 52  | 0.495 |
| SPATA20   | uc002irf.1,uc002ire.1,uc002ird.1                                                                                                                                     | 248  | 135 | 0.495 |
| HOXC9     | uc001sep.1                                                                                                                                                           | 330  | 136 | 0.495 |
| ARID1A    | uc009vsm.1                                                                                                                                                           | 91   | 45  | 0.495 |
| CEACAM20  | uc010ejq.1,uc010ejp.1,uc010ejo.1,uc010ein.1                                                                                                                          | 151  | 32  | 0.494 |
| CASS4     | uc002xpx.1,uc002xxr.1,uc002xxq.2                                                                                                                                     | 506  | 30  | 0.494 |
| RHOBTB1   | uc001jll.1                                                                                                                                                           | 75   | 37  | 0.493 |
| XKR9      | uc010lze.1,uc010lzd.1,uc003xyq.1                                                                                                                                     | 141  | 139 | 0.493 |
| BC111724  | uc002cuf.1                                                                                                                                                           | 141  | 139 | 0.493 |
| LETM1     | uc003gdw.1                                                                                                                                                           | 164  | 127 | 0.493 |
| ZNF717    | uc010hoq.1                                                                                                                                                           | 207  | 34  | 0.493 |
| CACNA1B   | uc004coh.1                                                                                                                                                           | 2334 | 60  | 0.493 |
| PROZ      | uc010agr.1,uc001vta.1                                                                                                                                                | 326  | 111 | 0.492 |
| MUC3A     | uc003uxl.1                                                                                                                                                           | 470  | 33  | 0.491 |
| CNGB1     | uc010cdh.1,uc002emt.1                                                                                                                                                | 1276 | 44  | 0.491 |
| KIAA1123  | uc002isi.2                                                                                                                                                           | 149  | 122 | 0.491 |
| TUBA8     | uc002znx.1                                                                                                                                                           | 226  | 37  | 0.491 |
| FRG1      | uc003izs.1                                                                                                                                                           | 89   | 240 | 0.490 |
| DOCK4     | uc003vfv.1                                                                                                                                                           | 204  | 25  | 0.490 |
| ZNF232    | uc002qat.1                                                                                                                                                           | 403  | 158 | 0.490 |
| BOC       | uc003eac.2                                                                                                                                                           | 121  | 83  | 0.490 |
| DKFZp547P | uc001zbi.1                                                                                                                                                           | 212  | 135 | 0.490 |
| SLC7A9    | uc002ntw.2,uc002ntu.2,uc002ntv.2                                                                                                                                     | 564  | 48  | 0.489 |
| ATN1      | uc001qrw.1                                                                                                                                                           | 804  | 28  | 0.488 |
| PPP1R14A  | uc010efv.1,uc002ohq.1                                                                                                                                                | 80   | 234 | 0.488 |
| MAN1B1    | uc004clf.1,uc004cle.1                                                                                                                                                | 382  | 62  | 0.487 |
| PASK      | uc002wap.2                                                                                                                                                           | 512  | 83  | 0.486 |
| SPG20     | uc001uvq.1                                                                                                                                                           | 305  | 37  | 0.485 |
| C20orf107 | uc002xxy.1                                                                                                                                                           | 99   | 32  | 0.485 |
| ARRDC5    | uc002mbm.1                                                                                                                                                           | 181  | 39  | 0.485 |

|            |                                                        |      |     |       |
|------------|--------------------------------------------------------|------|-----|-------|
| DYNC2L1    | uc002rtl.1,uc002rtk.1,uc002rtj.1                       | 95   | 46  | 0.484 |
| dJ402G11.5 | uc010hap.1,uc003bjv.1                                  | 537  | 195 | 0.484 |
| GRM2       | uc003dbp.1                                             | 204  | 69  | 0.483 |
| PEAR1      | uc001fqj.1                                             | 546  | 111 | 0.483 |
| HOXD3      | uc002ukt.1                                             | 232  | 112 | 0.483 |
| CD300LF    | uc002jff.1,uc002jij.1                                  | 140  | 27  | 0.482 |
| PRKAG2     | uc003wki.1                                             | 5405 | 75  | 0.482 |
| FRMD4A     | uc001imu.1                                             | 2489 | 38  | 0.481 |
| IL7        | uc003ybg.1                                             | 131  | 126 | 0.481 |
| ZFAT       | uc010meh.1,uc003yuo.1,uc003yun.1,uc003yur.1            | 1968 | 187 | 0.480 |
| MYLK2      | uc002wwq.2                                             | 313  | 50  | 0.479 |
| ARNT2      | uc002bfs.1                                             | 1259 | 36  | 0.479 |
| NPHS2      | uc009wxi.1,uc001gmq.2                                  | 82   | 157 | 0.479 |
| LDB3       | uc009xsv.1,uc001kds.1,uc001kdr.1,uc001kdv.1,uc001kdu.1 | 604  | 51  | 0.478 |
| LIG4       | uc001vqp.1                                             | 136  | 195 | 0.478 |
| SNCG       | uc001keb.1                                             | 76   | 121 | 0.478 |
| HEFL       | uc010gio.1                                             | 506  | 29  | 0.478 |
| NKX2-5     | uc003mcm.1                                             | 181  | 259 | 0.477 |
| PAQR5      | uc002asa.2                                             | 839  | 39  | 0.476 |
| PLD3       | uc002onn.1                                             | 455  | 50  | 0.476 |
| PTPRS      | uc002mbz.1                                             | 216  | 57  | 0.475 |
| TXNDC3     | uc003tfn.1                                             | 93   | 44  | 0.473 |
| RNB6       | uc010avu.1                                             | 1598 | 28  | 0.473 |
| LOC201175  | uc002iiz.1                                             | 444  | 105 | 0.473 |
| ZNF284     | uc002oyg.1                                             | 86   | 61  | 0.473 |
| DDX1       | uc002rce.1                                             | 134  | 95  | 0.473 |
| ABAT       | uc010buh.1,uc002czd.2                                  | 730  | 69  | 0.473 |
| TAF15      | uc002hkd.1,uc002hkc.1                                  | 218  | 103 | 0.472 |
| PVALB      | uc003apx.1                                             | 392  | 37  | 0.472 |
| DDC        | uc010kza.1                                             | 677  | 69  | 0.471 |
| ACSBG1     | uc002bdh.1                                             | 821  | 43  | 0.471 |
| KIAA1569   | uc002krv.1                                             | 397  | 28  | 0.470 |
| GLT25D1    | uc010eax.1                                             | 375  | 47  | 0.470 |
| C10orf110  | uc001ifx.2                                             | 147  | 46  | 0.469 |
| PCDHGB5    | uc003lkf.1                                             | 2529 | 138 | 0.469 |
| CCDC79     | uc002eqd.1                                             | 109  | 102 | 0.468 |
| BAG4       | uc003xkz.1,uc003xky.1                                  | 202  | 157 | 0.466 |
| UBE3B      | uc001tos.1                                             | 530  | 38  | 0.466 |
| CLCN2      | uc003foh.2                                             | 260  | 69  | 0.464 |
| ZNF442     | uc002mtr.1                                             | 96   | 89  | 0.464 |
| BTN2A2     | uc003nht.1,uc003nhs.2,uc003nhr.1,uc003nhq.1            | 82   | 38  | 0.463 |
| ZC3H12D    | uc003qmn.1                                             | 247  | 88  | 0.463 |
| EPB42      | uc001zqz.2                                             | 81   | 75  | 0.463 |
| ABCD1      | uc004fiq.1                                             | 128  | 79  | 0.463 |
| NINJ2      | uc001qil.1                                             | 1395 | 28  | 0.462 |
| PECAM1     | uc002jeg.1                                             | 585  | 40  | 0.462 |
| SGOL2      | uc002uvv.2,uc002uvw.1                                  | 78   | 72  | 0.462 |
| SAP130     | uc002tpn.1                                             | 506  | 25  | 0.461 |
| CD300A     | uc010dfs.1,uc010dfr.1,uc002jkw.1,uc002jkv.1            | 254  | 91  | 0.461 |
| TH         | uc001lvt.1,uc001lvs.1,uc001lvr.1,uc001lvq.1,uc001lvp.1 | 365  | 96  | 0.460 |
| SFTPB      | uc002sqj.1,uc002sqi.1,uc002sqh.1                       | 174  | 32  | 0.460 |
| ZNF595     | uc003fzv.1                                             | 158  | 581 | 0.460 |
| RAB11FIP1  | uc003xkp.1                                             | 99   | 26  | 0.460 |
| COBL       | uc003tpp.2                                             | 1371 | 40  | 0.460 |
| TEAD1      | uc009ygl.1,uc001mkk.2                                  | 293  | 31  | 0.458 |
| LRRRC37B   | uc010csu.1,uc002hqu.1                                  | 102  | 35  | 0.458 |
| CAPN3      | uc001zpq.1                                             | 125  | 80  | 0.457 |
| CPN2       | uc003fts.1                                             | 259  | 93  | 0.457 |
| IL22RA2    | uc003qhn.1,uc003qhm.1,uc003qhl.1                       | 124  | 34  | 0.457 |
| CR617046   | uc001myp.2                                             | 148  | 146 | 0.455 |
| TEPP       | uc002emw.2,uc002emv.2                                  | 346  | 35  | 0.455 |
| SSR2       | uc009wrm.1,uc001fmx.1                                  | 77   | 70  | 0.455 |
| RTN1       | uc001xem.1                                             | 397  | 219 | 0.454 |
| PIP5KL1    | uc004bsu.1                                             | 175  | 159 | 0.454 |
| GPIHBP1    | uc003yxu.1                                             | 116  | 171 | 0.454 |
| C7orf51    | uc003uve.1                                             | 222  | 181 | 0.453 |
| ACVRL1     | uc001rzk.1                                             | 217  | 86  | 0.453 |
| TC2N       | uc001xzv.2                                             | 460  | 32  | 0.452 |
| PIK3R6     | uc002qlq.1                                             | 640  | 35  | 0.451 |
| SELO       | uc003bjz.1                                             | 292  | 117 | 0.451 |
| ATP1A4     | uc001fve.2                                             | 234  | 35  | 0.449 |
| CYP27C1    | uc002tod.2                                             | 284  | 100 | 0.448 |
| MST091     | uc002vqq.2                                             | 186  | 50  | 0.448 |
| KIAA1132   | uc001pri.1                                             | 4245 | 98  | 0.448 |
| CTRC       | uc001awi.1,uc001awi.1                                  | 105  | 47  | 0.448 |
| C20orf197  | uc002ybj.1                                             | 226  | 56  | 0.446 |
| CRHR2      | uc003tbp.2                                             | 655  | 46  | 0.445 |
| PPP1R1B    | uc002hsc.1,uc002hsb.1                                  | 90   | 32  | 0.444 |
| MRP6       | uc002dem.1                                             | 90   | 60  | 0.444 |
| TUBB3      | uc002fpf.2                                             | 1043 | 240 | 0.444 |
| ARVCF      | uc002zra.1                                             | 504  | 71  | 0.443 |
| KIF25      | uc003qwl.1,uc003qwk.1                                  | 686  | 85  | 0.443 |
| DUSP18     | uc003aiu.2                                             | 194  | 143 | 0.442 |
| LPIN2      | uc002klo.1                                             | 643  | 42  | 0.441 |
| ASZ1       | uc003vjb.2                                             | 113  | 149 | 0.440 |
| TOP3b      | uc002zvr.2,uc010gtm.1                                  | 332  | 31  | 0.436 |
| PRSS36     | uc002ebd.1                                             | 405  | 197 | 0.432 |
| PSAPL1     | uc010idi.1                                             | 82   | 124 | 0.432 |
| RPS6KA1    | uc009vsl.1,uc001bms.1                                  | 345  | 62  | 0.431 |
| qrb7V      | uc002hst.1                                             | 164  | 101 | 0.431 |
| EDC4       | uc002eus.1                                             | 202  | 87  | 0.431 |
| CELSR3     | uc010hka.1                                             | 405  | 58  | 0.430 |
| KAT2A      | uc002hyx.2                                             | 270  | 116 | 0.430 |
| KIAA1501   | uc002hqc.1                                             | 599  | 147 | 0.429 |
| NR4A1      | uc001rzz.2                                             | 331  | 71  | 0.429 |
| EIF3L      | uc003auh.1                                             | 169  | 29  | 0.429 |

|             |                                                        |      |     |       |
|-------------|--------------------------------------------------------|------|-----|-------|
| KIAA1787    | uc002gqc.1                                             | 173  | 84  | 0.425 |
| ADAMTS17    | uc002bvx.1                                             | 3868 | 33  | 0.424 |
| BAIAP2L2    | uc003auw.1                                             | 748  | 152 | 0.423 |
| NM_001127   | uc010nmy.1                                             | 319  | 45  | 0.423 |
| PCNA        | uc002wlg.1                                             | 188  | 159 | 0.423 |
| ENTPD1      | uc001kle.1,uc001kli.2                                  | 447  | 28  | 0.423 |
| C1orf186    | uc001hdt.1                                             | 278  | 47  | 0.423 |
| MCM5        | uc003anw.1                                             | 354  | 52  | 0.422 |
| PHKA1       | uc004eay.2,uc004eax.2                                  | 178  | 25  | 0.421 |
| BOLL        | uc002uut.2,uc002uus.2,uc002uuu.1,uc002uur.2            | 91   | 460 | 0.421 |
| C6orf146    | uc003mvy.1                                             | 270  | 31  | 0.421 |
| CASQ1       | uc001fvi.1                                             | 99   | 25  | 0.421 |
| CNTN2       | uc001hbs.1                                             | 486  | 71  | 0.420 |
| AX721097    | uc002fji.2                                             | 86   | 48  | 0.419 |
| LRRC17      | uc003vau.1,uc003vat.1                                  | 104  | 29  | 0.418 |
| C21orf63    | uc002ypu.1                                             | 558  | 35  | 0.418 |
| SCML4       | uc003prv.2                                             | 192  | 37  | 0.418 |
| LOC283867   | uc002eol.1                                             | 766  | 29  | 0.416 |
| KLK8        | uc002puu.1                                             | 92   | 134 | 0.416 |
| FAM83E      | uc002pjn.2                                             | 481  | 153 | 0.416 |
| RAB11FIP5   | uc002sit.2                                             | 202  | 84  | 0.416 |
| ALPL        | uc001beu.2                                             | 453  | 25  | 0.414 |
| RBM47       | uc003gvd.2                                             | 790  | 28  | 0.414 |
| PLD5        | uc001hzm.2,uc001hzl.2                                  | 1198 | 30  | 0.413 |
| HSF5        | uc002iwi.1                                             | 324  | 401 | 0.413 |
| DNAJC14     | uc001shu.1                                             | 461  | 57  | 0.412 |
| pp6037      | uc009yue.1                                             | 306  | 56  | 0.412 |
| WDR59       | uc002fdq.1                                             | 447  | 35  | 0.411 |
| NUP210L     | uc001fdw.1                                             | 849  | 74  | 0.411 |
| LGALS4      | uc002ojg.1                                             | 186  | 87  | 0.409 |
| EXOC3L      | uc002erx.1                                             | 348  | 79  | 0.409 |
| PCDH8       | uc001vhi.1,uc001vhi.1                                  | 285  | 582 | 0.408 |
| HEATR5A     | uc010ami.1,uc001wrg.1                                  | 459  | 28  | 0.407 |
| ETV6        | uc001raa.1                                             | 1387 | 49  | 0.406 |
| CCDC64B     | uc002ctf.2,uc002cte.2                                  | 386  | 67  | 0.405 |
| TRAK1       | uc003ckz.2                                             | 494  | 25  | 0.405 |
| TCF4        | uc002lgb.1                                             | 267  | 36  | 0.404 |
| VAX1        | uc009yx.1,uc001ldb.1                                   | 220  | 400 | 0.404 |
| RPA3        | uc003sri.1                                             | 312  | 37  | 0.403 |
| ARX         | uc004dbp.2                                             | 413  | 83  | 0.402 |
| ST3GAL2     | uc002eyw.2                                             | 627  | 84  | 0.402 |
| MYL5        | uc003qav.1                                             | 196  | 105 | 0.402 |
| graf-2      | uc003ili.1                                             | 337  | 27  | 0.401 |
| ADAM2       | uc003xnl.1,uc003xnk.1,uc003xni.1                       | 162  | 54  | 0.400 |
| gklp        | uc001oee.1                                             | 245  | 49  | 0.400 |
| XAF1        | uc002qdo.1,uc002qdn.1,uc002qdr.1,uc002qdq.1,uc002qdp.1 | 85   | 68  | 0.400 |
| Insp3ri     | uc010hcc.1                                             | 317  | 38  | 0.400 |
| CGB8        | uc002pnc.1                                             | 89   | 105 | 0.393 |
| CETP        | uc002ekj.2,uc002eki.2                                  | 372  | 64  | 0.393 |
| TACC1       | uc010lwq.1,uc003xmh.2                                  | 121  | 37  | 0.393 |
| FOXP1       | uc002hbj.1                                             | 208  | 109 | 0.393 |
| CHRFAM7A    | uc010bai.1,uc010bak.1                                  | 229  | 30  | 0.393 |
| BC127913    | uc010axk.1                                             | 275  | 90  | 0.393 |
| PCDHGB1     | uc003ljo.1                                             | 3925 | 85  | 0.393 |
| KIAA1218    | uc003vdh.2                                             | 786  | 41  | 0.391 |
| WDR88       | uc002nui.1                                             | 545  | 213 | 0.391 |
| SEPX1       | uc002cng.1                                             | 118  | 184 | 0.390 |
| LYST        | uc001hxi.1                                             | 308  | 40  | 0.390 |
| FAM13C      | uc001jpk.2                                             | 230  | 57  | 0.389 |
| KIAA0148    | uc001tpr.1                                             | 207  | 46  | 0.389 |
| WNT5B       | uc009zdz.1                                             | 1291 | 35  | 0.389 |
| IL1F8       | uc002tiq.1                                             | 76   | 59  | 0.388 |
| LAX1        | uc001haa.1                                             | 80   | 31  | 0.388 |
| RIMKLB      | uc001quu.2                                             | 792  | 34  | 0.386 |
| MYST1       | uc002eaz.1                                             | 90   | 52  | 0.385 |
| AGAP3       | uc003wji.1                                             | 417  | 117 | 0.383 |
| HOM-TESSDC3 | uc001apq.2                                             | 159  | 73  | 0.383 |
| ABCC3       | uc001bsd.2                                             | 131  | 60  | 0.382 |
| GRIK2       | uc002isn.1                                             | 228  | 26  | 0.380 |
| C10orf108   | uc003pqn.2,uc010kcw.1,uc003ppp.2,uc003ppo.2            | 734  | 117 | 0.380 |
| ZNF580      | uc001ifr.2                                             | 211  | 89  | 0.380 |
| DKFZp564A   | uc002qlm.1                                             | 506  | 64  | 0.379 |
| CA5A        | uc002evs.1                                             | 91   | 69  | 0.379 |
| CYP4F12     | uc002fkn.1                                             | 1016 | 81  | 0.379 |
| NWD1        | uc002nbl.2                                             | 111  | 30  | 0.378 |
| DUXA        | uc002nev.2                                             | 866  | 28  | 0.377 |
| TP53        | uc002qoa.1                                             | 116  | 29  | 0.375 |
| OSTCL       | uc002qih.1,uc002qiq.1                                  | 98   | 55  | 0.374 |
| SPAG4L      | uc003qrw.1                                             | 102  | 38  | 0.373 |
| SLC6A12     | uc002wvi.1                                             | 242  | 45  | 0.372 |
| PTGIR       | uc001qhy.2,uc001qhx.2                                  | 147  | 41  | 0.372 |
| TNNT1       | uc002pex.1                                             | 111  | 299 | 0.372 |
| FAM151A     | uc002qjd.2,uc002qje.2,uc002qjc.2,uc002qjb.2,uc002qjf.2 | 400  | 27  | 0.371 |
| DKFZp564A   | uc001cxn.1                                             | 158  | 35  | 0.369 |
| OGT         | uc004ead.2                                             | 95   | 28  | 0.368 |
| MIOX        | uc004eac.2                                             | 95   | 28  | 0.368 |
| SNX20       | uc003bln.1,uc003blm.1,uc003bll.1                       | 125  | 138 | 0.368 |
| ADAT1       | uc002egk.1,uc002eqi.2                                  | 272  | 70  | 0.368 |
| BEAN        | uc002fep.1,uc002feo.1                                  | 164  | 120 | 0.366 |
| SIGIRR      | uc002eoa.1                                             | 241  | 80  | 0.365 |
| PIWIL2      | uc001lbd.1                                             | 343  | 48  | 0.364 |
| SLC5A11     | uc010ltv.1,uc003xbn.1                                  | 440  | 160 | 0.364 |
| CATSPER4    | uc010bxt.1,uc002dmu.1,uc002dmt.1,uc002dms.1            | 473  | 43  | 0.364 |
| GSG1        | uc001blp.1                                             | 110  | 40  | 0.364 |
| VSTM1       | uc001rbp.1,uc001rbo.1,uc001rbn.1,uc001rbq.1            | 235  | 32  | 0.363 |
|             | uc002qcx.2,uc002qcw.2                                  | 144  | 87  | 0.362 |

|           |                                                        |      |     |       |
|-----------|--------------------------------------------------------|------|-----|-------|
| EPX       | uc002ivq.2                                             | 162  | 70  | 0.360 |
| DISC1     | uc001hvc.2                                             | 95   | 111 | 0.360 |
| C9        | uc003jlv.2                                             | 115  | 31  | 0.359 |
| MRAP      | uc002ypl.1                                             | 200  | 154 | 0.359 |
| ZBTB7B    | uc001fgl.2                                             | 141  | 126 | 0.357 |
| FN3K      | uc002kfw.1                                             | 142  | 81  | 0.357 |
| FAT1      | uc010isn.1,uc003ize.1                                  | 101  | 36  | 0.356 |
| COL8A1    | uc003dth.1,uc003dtq.1                                  | 337  | 30  | 0.356 |
| RP11-     | uc003oqk.1                                             | 213  | 126 | 0.355 |
| RASAL3    | uc002nbe.2,uc010eea.1                                  | 564  | 75  | 0.355 |
| TMEFF1    | uc004bay.1                                             | 799  | 53  | 0.354 |
| FLJ00251  | uc001mdw.2                                             | 389  | 60  | 0.353 |
| PPP1R7    | uc002wav.1                                             | 394  | 26  | 0.352 |
| OGDH      | uc003tjp.1,uc003tlo.1                                  | 446  | 28  | 0.352 |
| PILRA     | uc003uuq.1,uc003uup.1,uc003uuo.1                       | 243  | 64  | 0.351 |
| DEF6      | uc010jvt.1,uc010jvs.1,uc003okk.1                       | 361  | 39  | 0.351 |
| SYNGAP1   | uc010juz.1                                             | 295  | 47  | 0.351 |
| CLCNKA    | uc001axv.1,uc001axu.1                                  | 117  | 41  | 0.350 |
| ARSA      | uc003bmd.2,uc003bnc.2,uc003bnb.2,uc003bna.2            | 80   | 280 | 0.350 |
| CORO6     | uc002hen.2,uc002hem.2,uc002hel.1                       | 154  | 269 | 0.349 |
| PRMT2     | uc002ziz.1                                             | 491  | 52  | 0.348 |
| CACNA1S   | uc001qvv.1                                             | 1019 | 40  | 0.348 |
| UNQ385    | uc003gbb.1                                             | 256  | 216 | 0.347 |
| SAMD14    | uc002iqe.1                                             | 312  | 48  | 0.346 |
| ERCC6L    | uc004eap.1,uc004eap.1                                  | 110  | 76  | 0.345 |
| AP2M1     | uc003fmy.1,uc010hxu.1                                  | 116  | 50  | 0.345 |
| APBA2     | uc001zcl.1,uc001zck.1,uc010azi.1                       | 3028 | 32  | 0.345 |
| ARRDC3    | uc003kiz.1                                             | 180  | 62  | 0.344 |
| C3orf22   | uc003ejb.1                                             | 214  | 55  | 0.343 |
| ARID3C    | uc003zuy.1                                             | 251  | 43  | 0.343 |
| SERINC3   | uc010qgs.1,uc002xmf.1,uc002xme.1                       | 127  | 87  | 0.343 |
| SCIN      | uc003sso.2                                             | 219  | 25  | 0.342 |
| CCDC81    | uc001pbx.1,uc001pbw.1                                  | 148  | 76  | 0.342 |
| GRIP2     | uc003byt.1                                             | 943  | 28  | 0.341 |
| NEUROD2   | uc002hry.1                                             | 218  | 297 | 0.341 |
| SAG       | uc002vuh.2                                             | 652  | 38  | 0.340 |
| KIAA0613  | uc009xsx.1                                             | 1276 | 51  | 0.340 |
| ACCN3     | uc003wip.2,uc003wio.2,uc003win.2                       | 196  | 244 | 0.340 |
| ACACB     | uc001toc.1                                             | 1736 | 33  | 0.338 |
| HTR3A     | uc001pon.1,uc001pom.1                                  | 202  | 34  | 0.337 |
| LGALS12   | uc001nxc.1,uc001nxb.1,uc001nxa.1                       | 121  | 27  | 0.335 |
| CAPN11    | uc003owt.1                                             | 314  | 30  | 0.334 |
| ZNF687    | uc009wmp.1                                             | 128  | 71  | 0.333 |
| TMEM82    | uc001axc.1                                             | 81   | 121 | 0.332 |
| FCHSD1    | uc010jqq.1                                             | 127  | 42  | 0.331 |
| limkain   | uc001ufv.1                                             | 361  | 94  | 0.330 |
| LIM2      | uc002pwm.1,uc002pwl.1                                  | 91   | 60  | 0.330 |
| CPT1A     | uc009ysj.1                                             | 1186 | 60  | 0.329 |
| CTNND1    | uc001nlh.1                                             | 378  | 148 | 0.326 |
| TBC1D24   | uc002cqm.1                                             | 1153 | 232 | 0.326 |
| SLC9A3R1  | uc002jlp.1                                             | 120  | 97  | 0.323 |
| POU2F3    | uc001pxe.1                                             | 99   | 48  | 0.323 |
| KLK14     | uc002pvs.1                                             | 171  | 46  | 0.323 |
| NKX2-3    | uc009xwj.1                                             | 222  | 143 | 0.322 |
| SYTL1     | uc009vsv.1                                             | 392  | 56  | 0.321 |
| C19orf51  | uc002qjl.1,uc002qjk.1,uc002qji.1,uc002qjj.1            | 374  | 144 | 0.321 |
| FUT3      | uc002mdl.2,uc002mdj.2,uc002mdm.2,uc002mdk.2            | 97   | 31  | 0.320 |
| KPL1      | uc009vtr.1                                             | 188  | 30  | 0.319 |
| NRXN2     | uc001oao.1                                             | 384  | 49  | 0.319 |
| PAQR6     | uc001fny.1,uc001fnx.1,uc001fnw.1,uc001fnv.1,uc001fnu.1 | 147  | 78  | 0.318 |
| DQ866763  | uc001vue.2                                             | 150  | 167 | 0.318 |
| DPH1      | uc002ftu.1                                             | 215  | 51  | 0.316 |
| IGLON5    | uc002pwc.2                                             | 399  | 98  | 0.316 |
| OPN4      | uc001kdq.1,uc001kdp.1                                  | 317  | 50  | 0.315 |
| FBXO32    | uc003yqq.1                                             | 180  | 34  | 0.315 |
| MICAL2PV2 | uc001mkc.2                                             | 884  | 51  | 0.313 |
| MICAL2PV1 | uc001mkb.2                                             | 884  | 51  | 0.313 |
| GHDC      | uc002hzd.1                                             | 80   | 75  | 0.313 |
| MEOX1     | uc002iea.1,uc002idz.1,uc002ieb.1                       | 405  | 72  | 0.311 |
| FANCL     | uc010fcf.1,uc010fce.1,uc002rzw.2,uc002rxz.2            | 127  | 79  | 0.311 |
| SCAND2    | uc002bks.2                                             | 253  | 78  | 0.308 |
| BTNL9     | uc003mmt.1                                             | 832  | 45  | 0.306 |
| SDPR      | uc002utb.1                                             | 93   | 57  | 0.306 |
| HCCA2     | uc001ltp.1,uc001lto.1                                  | 301  | 122 | 0.304 |
| COL8A2    | uc001bzw.1,uc001bzb.1                                  | 112  | 68  | 0.304 |
| NM_207423 | uc001ijx.1                                             | 133  | 281 | 0.302 |
| ALOX12B   | uc002qjv.1                                             | 421  | 79  | 0.300 |
| IRF1      | uc003kxb.1                                             | 394  | 47  | 0.298 |
| SNRPA     | uc002opa.1                                             | 166  | 33  | 0.298 |
| KIR3DX1   | uc002qqe.1                                             | 131  | 39  | 0.298 |
| ATG9B     | uc010lpv.1                                             | 768  | 48  | 0.297 |
| NRBP2     | uc003yvw.1                                             | 158  | 131 | 0.296 |
| TPSG1     | uc002ckw.1                                             | 100  | 128 | 0.295 |
| FLJ00180  | uc010bto.1                                             | 112  | 33  | 0.295 |
| TRIM61    | uc003iqw.1                                             | 188  | 41  | 0.291 |
| ATP13A3   | uc003ftx.2                                             | 112  | 26  | 0.290 |
| AK308580  | uc010ekl.1                                             | 216  | 141 | 0.290 |
| TBC1D4    | uc010aer.1                                             | 83   | 36  | 0.289 |
| CYP8B1    | uc010hif.1                                             | 119  | 57  | 0.287 |
| TEKT4     | uc002stw.1                                             | 216  | 134 | 0.286 |
| MYO18A    | uc002hds.1                                             | 1635 | 39  | 0.286 |
| DHH       | uc001rtf.1                                             | 326  | 93  | 0.285 |
| C15orf39  | uc002azp.2                                             | 589  | 42  | 0.285 |
| AQP4      | uc002kwa.1                                             | 102  | 29  | 0.284 |
| KANK4     | uc001daf.2                                             | 158  | 28  | 0.284 |
| DGUOK     | uc002sjy.1,uc002sjsx.1                                 | 122  | 69  | 0.283 |

|           |                                             |      |     |       |
|-----------|---------------------------------------------|------|-----|-------|
| F12       | uc003mgo.2                                  | 518  | 36  | 0.278 |
| ABI3      | uc002ioq.1,uc002iop.1                       | 244  | 45  | 0.277 |
| NR4A3     | uc004bah.1                                  | 304  | 63  | 0.276 |
| HCA58     | uc002xel.1                                  | 145  | 32  | 0.276 |
| BTBD17    | uc002jkn.1                                  | 396  | 135 | 0.273 |
| KIAA1335  | uc002xjz.1                                  | 172  | 39  | 0.272 |
| PDX1      | uc001urt.2                                  | 209  | 282 | 0.270 |
| RCCD1     | uc002bql.1,uc002bqk.1,uc002bqi.1            | 288  | 272 | 0.270 |
| CAPN5     | uc001oya.1                                  | 75   | 111 | 0.269 |
| CIB3      | uc010eaq.1,uc010eae.1,uc002nds.1            | 123  | 33  | 0.268 |
| AK123582  | uc002fhs.1                                  | 89   | 167 | 0.268 |
| ART1      | uc009yeb.1,uc001lye.1                       | 126  | 27  | 0.268 |
| NCAN      | uc010ecc.1                                  | 136  | 45  | 0.265 |
| LDLR      | uc010dxu.1                                  | 91   | 72  | 0.264 |
| UNQ6496   | uc004brq.1                                  | 179  | 60  | 0.261 |
| PNLIPRP2  | uc001lca.1,uc009xyt.1                       | 223  | 58  | 0.260 |
| MASP2     | uc001aru.1                                  | 161  | 97  | 0.258 |
| C22orf28  | uc003amm.2                                  | 130  | 67  | 0.258 |
| MORN3     | uc001uax.1                                  | 402  | 69  | 0.257 |
| BATF2     | uc001ocf.1                                  | 149  | 38  | 0.255 |
| TP53INP2  | uc002xau.1                                  | 304  | 229 | 0.251 |
| PRTN3     | uc002lqa.1                                  | 287  | 72  | 0.251 |
| DKFZp686B | uc010els.1                                  | 206  | 71  | 0.251 |
| U2AF1     | uc002zcy.1                                  | 250  | 25  | 0.250 |
| ISLR2     | uc002axd.1,uc010bjf.1,uc002axe.1,uc002axf.1 | 666  | 248 | 0.248 |
| HPCA      | uc001bwh.1                                  | 199  | 147 | 0.246 |
| IL15RA    | uc001iiu.1                                  | 114  | 37  | 0.243 |
| UNQ3098   | uc002orc.1                                  | 263  | 32  | 0.243 |
| DBX1      | uc001mpw.1                                  | 144  | 137 | 0.238 |
| SLC29A2   | uc001ohs.1                                  | 97   | 69  | 0.237 |
| HYLS1     | uc001qcw.1                                  | 297  | 35  | 0.236 |
| FXYD1     | uc002nyc.1                                  | 134  | 125 | 0.233 |
| IGSF11    | uc010hqs.1,uc003ebz.1,uc003eby.1            | 667  | 81  | 0.233 |
| DNAH8     | uc003ooe.1                                  | 776  | 28  | 0.231 |
| AX747263  | uc003syp.1                                  | 224  | 187 | 0.228 |
| EIF4A1    | uc002gho.1                                  | 347  | 45  | 0.227 |
| IMDC      | uc003xnf.1,uc003xne.1                       | 81   | 55  | 0.226 |
| AB209692  | uc001nwn.1                                  | 84   | 38  | 0.226 |
| MYO1H     | uc009zvh.1                                  | 469  | 39  | 0.226 |
| TRPC3     | uc003ief.1,uc010inr.1                       | 76   | 166 | 0.218 |
| DNM1      | uc004buc.1,uc004bub.1                       | 492  | 43  | 0.210 |
| RUSC1     | uc001fkk.2,uc001fkj.2                       | 342  | 188 | 0.206 |
| BC075797  | uc003ssl.1                                  | 192  | 79  | 0.206 |
| NLRP13    | uc002qmq.1                                  | 213  | 50  | 0.205 |
| RINL      | uc002oiq.1                                  | 284  | 38  | 0.201 |
| ABCG8     | uc002rtq.1                                  | 258  | 62  | 0.200 |
| NBLA00301 | uc003itl.2                                  | 196  | 157 | 0.200 |
| C20orf78  | uc002wrj.1                                  | 130  | 26  | 0.200 |
| KRT79     | uc001sbb.1                                  | 124  | 62  | 0.200 |
| PCOLCE    | uc003uvo.2                                  | 231  | 92  | 0.199 |
| NHLH2     | uc001efy.1,uc009wqz.1                       | 272  | 81  | 0.199 |
| RENBP     | uc004fjo.1                                  | 101  | 99  | 0.196 |
| ZNF19     | uc002fal.1,uc010cqc.1,uc002fam.1            | 94   | 70  | 0.186 |
| MAPKBP1   | uc010bcl.1                                  | 352  | 36  | 0.184 |
| PNMAL2    | uc002pes.2                                  | 280  | 405 | 0.181 |
| HOXB3     | uc010dbq.1,uc010dbf.1,uc002inn.1            | 1207 | 39  | 0.178 |
| PHOSPHO   | uc002ior.1                                  | 281  | 149 | 0.177 |
| MPL       | uc009vvr.1,uc001ciw.1,uc001civ.2            | 204  | 27  | 0.176 |
| TTLL4     | uc010fvx.1                                  | 81   | 28  | 0.173 |
| SLAMF1    | uc001fwl.2                                  | 120  | 26  | 0.163 |
| MYOZ3     | uc003lsr.2,uc003lss.2                       | 309  | 28  | 0.159 |
| NRTN      | uc002mde.1                                  | 292  | 130 | 0.148 |
| GPS2      | uc002qfz.1                                  | 258  | 113 | 0.146 |
| AQP2      | uc001rvn.1                                  | 132  | 103 | 0.142 |
| C14orf93  | uc001wib.1                                  | 91   | 51  | 0.140 |
| EVX2      | uc002uke.1                                  | 201  | 247 | 0.137 |
| KIAA0985  | uc001tua.1                                  | 174  | 26  | 0.120 |
| PON1      | uc003uns.1                                  | 77   | 60  | 0.111 |
| CTCF      | uc002etm.1                                  | 130  | 55  | 0.106 |
| NR112     | uc003edl.1                                  | 82   | 43  | 0.105 |
| PRRG2     | uc002pon.2                                  | 179  | 61  | 0.097 |
| ZNF335    | uc002xqv.1                                  | 94   | 54  | 0.096 |
| hCG 31249 | uc004bzl.2                                  | 269  | 165 | 0.094 |
| KCNC3     | uc002prt.1                                  | 364  | 195 | 0.067 |
| SERPINC1  | uc001qit.1                                  | 83   | 30  | 0.060 |
| SPRED3    | uc002oim.1                                  | 311  | 68  | 0.044 |
| EFNB1     | uc004dxe.2,uc004dxd.2                       | 106  | 173 | 0.000 |
| GPR172A   | uc003zcc.1,uc003zce.1,uc003zcd.1            | 76   | 339 | 0.000 |
| AP3M2     | uc003xop.1,uc003xoo.1                       | 76   | 243 | 0.000 |
| ZNF703    | uc003xjy.1                                  | 130  | 458 | 0.000 |
| PP838     | uc003uss.1                                  | 94   | 174 | 0.000 |
| EPHA7     | uc003poq.2                                  | 148  | 293 | 0.000 |
| AMD1      | uc003pul.1,uc003puk.1                       | 89   | 323 | 0.000 |
| C6orf57   | uc003pfq.1                                  | 83   | 83  | 0.000 |
| SOX4      | uc003ndi.1                                  | 112  | 336 | 0.000 |
| SHROOM1   | uc003kxy.1                                  | 186  | 306 | 0.000 |
| GFM2      | uc010izj.1,uc003kdi.1,uc003kdh.1            | 85   | 101 | 0.000 |
| NPM1      | uc003mbh.1,uc003mbj.1,uc003mbi.1            | 93   | 193 | 0.000 |
| TNFAIP8   | uc003ksh.1                                  | 110  | 88  | 0.000 |
| HAND2     | uc003ith.1                                  | 83   | 332 | 0.000 |
| DUSP7     | uc003dct.1                                  | 110  | 325 | 0.000 |
| CCK       | uc003cid.1                                  | 95   | 139 | 0.000 |
| RPS19BP1  | uc003ayb.1                                  | 83   | 126 | 0.000 |
| HNRPLL    | uc002rqx.1                                  | 87   | 209 | 0.000 |
| SOX11     | uc002qvi.1                                  | 245  | 293 | 0.000 |
| FLJ36070  | uc002pkq.1                                  | 268  | 132 | 0.000 |

|           |                       |     |     |       |
|-----------|-----------------------|-----|-----|-------|
| KISS1R    | uc002lqk.2            | 262 | 352 | 0.000 |
| TOB1      | uc010dbv.1            | 126 | 295 | 0.000 |
| HOXB13    | uc002ioa.1            | 85  | 128 | 0.000 |
| GALR2     | uc002jqm.1            | 161 | 401 | 0.000 |
| HEXIM1    | uc002liq.1            | 122 | 153 | 0.000 |
| BCL6B     | uc002qeg.2,uc010cct.1 | 100 | 179 | 0.000 |
| IRX5      | uc002ehv.1            | 131 | 422 | 0.000 |
| TMEM159   | uc002dih.2,uc002dif.2 | 137 | 122 | 0.000 |
| IMP3      | uc002bat.2            | 219 | 221 | 0.000 |
| AEN       | uc010bni.1            | 75  | 142 | 0.000 |
| ZFP36L1   | uc001xki.1,uc001xkh.1 | 83  | 102 | 0.000 |
| ATP6V1D   | uc001xjf.1            | 107 | 143 | 0.000 |
| KLF5      | uc001vje.1            | 95  | 404 | 0.000 |
| C13orf36  | uc001uvt.2            | 83  | 240 | 0.000 |
| GPN3      | uc001tqs.1,uc001tqr.1 | 88  | 82  | 0.000 |
| SILV      | uc001siq.1,uc001sip.1 | 75  | 27  | 0.000 |
| ELA1      | uc001ryi.1            | 89  | 32  | 0.000 |
| PRPH      | uc001rtu.1            | 100 | 357 | 0.000 |
| WEE1      | uc001mhs.1            | 95  | 404 | 0.000 |
| AL157440  | uc001kec.1            | 89  | 147 | 0.000 |
| C10orf114 | uc001iqn.2            | 98  | 312 | 0.000 |
| KIAA0335  | uc001klr.1,uc001klq.1 | 94  | 121 | 0.000 |
| ZNF518A   | uc001klo.1,uc001klp.1 | 94  | 121 | 0.000 |
| ACTA1     | uc001htm.1            | 81  | 298 | 0.000 |
| UBE2U     | uc001dbn.1            | 76  | 42  | 0.000 |

**Table S4.2**

**List of candidate genes whose expression was down-regulated in the Saqqaq hairs.**

This list corresponds to the first 1,000 non-redundant genes showing the lowest  $R_s$  values (transcripts are collapsed into a single Gene name, providing the maximal  $R_s$  value observed in this quartile).  $R_s$  values and respective coverage in PM and RE regions are provided.

| Gene        | UCSC                                                                                               | Cov(GB) | Cov(PM) | Rs  |
|-------------|----------------------------------------------------------------------------------------------------|---------|---------|-----|
| UTY         | uc004fsv.1,uc004fsx.1                                                                              | 400     | 49      | Inf |
| PRKY        | uc004fre.1                                                                                         | 395     | 163     | Inf |
| MPP1        | uc010nvg.1,uc004fmq.1,uc004fmp.1                                                                   | 86      | 101     | Inf |
| FAM3A       | uc004flu.1,uc004flt.1,uc004flw.1,uc004fls.1                                                        | 161     | 98      | Inf |
| DNASE1L1    | uc004fkv.1,uc004fkv.1,uc004fku.1                                                                   | 127     | 140     | Inf |
| IRAK        | uc010nur.1                                                                                         | 192     | 164     | Inf |
| IRAK1       | uc004fju.1,uc004fjt.1,uc004fjs.1,uc004fjr.1                                                        | 96      | 164     | Inf |
| HCFC1       | uc004fjp.1                                                                                         | 710     | 148     | Inf |
| ARD1A       | uc004fjn.1,uc004fjm.1                                                                              | 89      | 141     | Inf |
| L1CAM       | uc004fje.1,uc010nuo.1,uc004fjc.1,uc004fjb.1                                                        | 213     | 156     | Inf |
| UCHL5IP     | uc004fho.1,uc004fhn.1                                                                              | 341     | 95      | Inf |
| GABRE       | uc004ffi.1,uc004ffh.1,uc004fff.1,uc004ffq.1                                                        | 83      | 123     | Inf |
| CD99L2      | uc004fen.1,uc004fem.1,uc004fel.1                                                                   | 564     | 157     | Inf |
| IDS         | uc004fcv.2,uc004fcu.2,uc004fct.2                                                                   | 94      | 59      | Inf |
| ZNF75D      | uc004evp.1                                                                                         | 124     | 51      | Inf |
| MOSPD1      | uc004evb.1                                                                                         | 103     | 66      | Inf |
| ZNF280C     | uc010nrf.1,uc004evm.1                                                                              | 119     | 48      | Inf |
| APLN        | uc004eus.1                                                                                         | 78      | 152     | Inf |
| SMARCA1     | uc004eup.2,uc004eun.2                                                                              | 101     | 74      | Inf |
| CUL4B       | uc004esw.1                                                                                         | 149     | 30      | Inf |
| FAM70A      | uc010nqo.1,uc004esp.2,uc004eso.2                                                                   | 144     | 99      | Inf |
| KIAA1210    | uc004era.2                                                                                         | 172     | 44      | Inf |
| KLHL13      | uc004eqm.1                                                                                         | 182     | 95      | Inf |
| AMOT        | uc004eps.1                                                                                         | 158     | 56      | Inf |
| TRPC5       | uc004epm.1,uc004epl.1                                                                              | 400     | 36      | Inf |
| AMMECR1     | uc004eop.1,uc004eoo.1                                                                              | 110     | 103     | Inf |
| TSC22D3     | uc004enj.1,uc004eni.1,uc004enh.1                                                                   | 329     | 102     | Inf |
| NUP62CL     | uc004ena.1                                                                                         | 128     | 44      | Inf |
| MORC4       | uc004emw.2,uc004emv.2,uc004emu.2                                                                   | 77      | 124     | Inf |
| MCART6      | uc004etu.1                                                                                         | 209     | 39      | Inf |
| BTX         | uc010nno.1                                                                                         | 152     | 38      | Inf |
| TRMT2B      | uc004eqq.1,uc004eqv.1,uc004eqt.1,uc004eqr.1                                                        | 144     | 39      | Inf |
| DKFZp667H0  | uc004equ.1                                                                                         | 144     | 39      | Inf |
| CXorf34     | uc004eqs.1                                                                                         | 144     | 39      | Inf |
| HDX         | uc004eel.1,uc004eek.1                                                                              | 103     | 35      | Inf |
| RPS6KA6     | uc004eej.1                                                                                         | 120     | 92      | Inf |
| BRWD3       | uc004edu.2,uc004eeb.2,uc004eea.2,uc004edz.2,uc004edy.2,uc004edx.2,uc004edw.2,uc004edv.2,uc004edt.2 | 194     | 56      | Inf |
| ZDHH15      | uc004ech.1,uc004ecq.1                                                                              | 141     | 41      | Inf |
| ZMYM3       | uc004dzi.1,uc004dzi.1,uc004dzh.1                                                                   | 178     | 76      | Inf |
| LAS1L       | uc004dwd.1,uc004dwc.1,uc004dwa.1                                                                   | 80      | 44      | Inf |
| KIAA0424    | uc004dvi.1,uc004dvk.1                                                                              | 117     | 48      | Inf |
| ARHGFE9     | uc004dvm.1,uc004dvl.2                                                                              | 117     | 48      | Inf |
| PHF8        | uc004dsy.2,uc004dsw.1,uc004dsu.1,uc004dst.1                                                        | 307     | 33      | Inf |
| HUWE1       | uc004dsp.1                                                                                         | 522     | 71      | Inf |
| JARID1C     | uc004dsa.1,uc004drz.1                                                                              | 196     | 75      | Inf |
| SYP         | uc004dna.1,uc004dmz.1                                                                              | 79      | 89      | Inf |
| WDR45       | uc004dmo.1,uc004dmp.1                                                                              | 190     | 60      | Inf |
| DKFZp761J18 | uc004dmc.2                                                                                         | 99      | 92      | Inf |
| TFE3        | uc004dmb.2,uc004dmd.1                                                                              | 99      | 92      | Inf |
| SLC35A2     | uc004dlo.1                                                                                         | 76      | 54      | Inf |
| ELK1        | uc010nhw.1,uc010nhv.1,uc004dik.2                                                                   | 107     | 64      | Inf |
| SYN1        | uc004die.1,uc004did.1                                                                              | 371     | 135     | Inf |
| ZNF41       | uc004dhx.2,uc004dhy.2                                                                              | 112     | 74      | Inf |
| SLC9A7      | uc004dqv.1,uc004dqu.1                                                                              | 146     | 140     | Inf |
| BCOR        | uc004deq.2,uc004deo.2,uc004dep.2,uc004dem.2,uc004den.2                                             | 571     | 236     | Inf |
| SRPX        | uc004ddz.1,uc004ddv.1                                                                              | 118     | 80      | Inf |
| KLHL15      | uc004ddb.1                                                                                         | 196     | 101     | Inf |
| PHKA2       | uc010nfe.1                                                                                         | 173     | 27      | Inf |
| DKFZp434M1  | uc010nfd.1                                                                                         | 247     | 144     | Inf |
| SCML2       | uc004cyl.2                                                                                         | 250     | 144     | Inf |
| RAI2        | uc004cyq.1,uc004cyf.1,uc004cyh.2,uc010nfa.1                                                        | 191     | 135     | Inf |
| ARHGAP6     | uc004cun.1                                                                                         | 453     | 91      | Inf |
| MID1        | uc004cth.2,uc004ctg.2                                                                              | 320     | 44      | Inf |
| HDHD1A      | uc010ndl.1,uc004crv.1                                                                              | 403     | 166     | Inf |
| NLGN4X      | uc010ndh.1,uc010ndj.1,uc010ndi.1,uc004crr.1,uc004crq.1                                             | 600     | 110     | Inf |
| MXRA5       | uc004crq.2                                                                                         | 158     | 158     | Inf |
| BRCC3       | uc004fmb.1,uc004fna.1                                                                              | 119     | 114     | Inf |
| TAZ         | uc004fjc.2,uc010nuv.1,uc004fib.1,uc004fla.1,uc004fky.1,uc004fkx.1                                  | 93      | 133     | Inf |
| SLC6A8      | uc004fic.2,uc004fib.2                                                                              | 114     | 125     | Inf |
| BGN         | uc004fhr.1                                                                                         | 273     | 75      | Inf |
| NSDHL       | uc004fqs.1,uc004fat.1                                                                              | 197     | 70      | Inf |
| MTMR1       | uc004feh.1,uc004fei.1                                                                              | 312     | 97      | Inf |
| FHL1        | uc010nrz.1,uc004ezl.1                                                                              | 198     | 172     | Inf |
| FAM122C     | uc010nru.1                                                                                         | 86      | 64      | Inf |
| HPRT1       | uc004exl.2                                                                                         | 84      | 117     | Inf |
| PHF6        | uc004exi.2,uc004exk.1,uc004exj.1                                                                   | 88      | 54      | Inf |
| FLJ30058    | uc004ewa.1,uc004evz.1                                                                              | 238     | 75      | Inf |
| XPNPEP2     | uc004eut.1                                                                                         | 169     | 31      | Inf |
| XIAP        | uc010nav.1,uc010nau.1,uc004etx.1                                                                   | 227     | 73      | Inf |
| GRIA3       | uc004etr.2,uc004etq.2                                                                              | 301     | 67      | Inf |
| SLC25A43    | uc004erd.1                                                                                         | 171     | 82      | Inf |
| LONRF3      | uc004eqz.1,uc004eqx.1,uc004eqw.1                                                                   | 100     | 103     | Inf |
| IL13RA1     | uc004eat.1,uc004eqs.1                                                                              | 214     | 126     | Inf |
| PLS3        | uc010nqf.1,uc010nqg.1,uc004eqd.1                                                                   | 198     | 84      | Inf |
| ZCCHC16     | uc004epo.1                                                                                         | 392     | 30      | Inf |
| PAK3        | uc010npu.1,uc010npt.1,uc004eoz.2                                                                   | 307     | 36      | Inf |
| ATG4A       | uc004ens.1,uc004ent.1,uc004enr.1                                                                   | 76      | 52      | Inf |
| IL1RAPL2    | uc004elz.1                                                                                         | 896     | 106     | Inf |
| DACH2       | uc010nmq.1,uc004eex.1,uc004eew.1                                                                   | 459     | 63      | Inf |
| CHIC1       | uc004ebi.2,uc004ebk.2                                                                              | 92      | 66      | Inf |
| OGT         | uc004eab.1,uc004eaa.1                                                                              | 142     | 53      | Inf |
| NLGN3       | uc010nlb.1,uc004dzc.1,uc004dzb.1                                                                   | 169     | 42      | Inf |
| MED12       | uc004dyz.1,uc004dyv.1                                                                              | 166     | 41      | Inf |
| DLG3        | uc004dvi.1,uc004dyi.1                                                                              | 192     | 35      | Inf |
| KIF4A       | uc004dyf.1,uc010nkw.1,uc004dyg.1                                                                   | 180     | 43      | Inf |

|            |                                                                                                          |      |     |     |
|------------|----------------------------------------------------------------------------------------------------------|------|-----|-----|
| EDA        | uc004dxm.1,uc004dxn.1,uc004dxq.1,uc004dpx.1,uc004dxx.1,uc004dxr.1                                        | 223  | 98  | Inf |
| STARD8     | uc004dxc.2                                                                                               | 235  | 85  | Inf |
| MSN        | uc004dwf.1                                                                                               | 162  | 58  | Inf |
| GNL3L      | uc004dth.1                                                                                               | 178  | 47  | Inf |
| CCNB3      | uc004dox.2                                                                                               | 140  | 33  | Inf |
| CLCN5      | uc004doq.1,uc004dor.1                                                                                    | 203  | 92  | Inf |
| CGDC22     | uc004dnd.1                                                                                               | 158  | 31  | Inf |
| ZNF81      | uc010nhv.1                                                                                               | 75   | 26  | Inf |
| DKFZp434P0 | uc004dhe.1                                                                                               | 328  | 67  | Inf |
| RBM10      | uc004dhi.1,uc010nhq.1,uc004dhh.1,uc004dhg.1,uc004dhf.1                                                   | 500  | 60  | Inf |
| RP2        | uc004dgw.2                                                                                               | 121  | 74  | Inf |
| TSPAN7     | uc004deg.2                                                                                               | 154  | 96  | Inf |
| LANCL3     | uc004ddp.1                                                                                               | 89   | 55  | Inf |
| PRRG1      | uc004ddo.1,uc004ddn.1                                                                                    | 128  | 94  | Inf |
| PRGP1      | uc004ddm.2                                                                                               | 113  | 94  | Inf |
| PK3        | uc004dbh.1,uc004dbq.1                                                                                    | 185  | 93  | Inf |
| PTCHD1     | uc010nfu.1,uc004dal.2                                                                                    | 85   | 163 | Inf |
| YY2        | uc010nfq.1                                                                                               | 129  | 60  | Inf |
| MBTPS2     | uc004dab.1,uc004dac.1                                                                                    | 177  | 60  | Inf |
| CDKL5      | uc004cym.1                                                                                               | 637  | 100 | Inf |
| REPS2      | uc004cxw.1,uc004cxv.1                                                                                    | 404  | 75  | Inf |
| SYAP1      | uc004cxo.1,uc004cxp.1                                                                                    | 165  | 58  | Inf |
| CA5B       | uc004cxe.1                                                                                               | 180  | 54  | Inf |
| OFD1       | uc004cvv.2,uc004cvu.2,uc010nen.1,uc004cvq.2,uc004cvt.2,uc004cvs.2                                        | 97   | 63  | Inf |
| PRPS2      | uc004cvb.1,uc004cva.1                                                                                    | 99   | 144 | Inf |
| FRMPD4     | uc004cuz.1                                                                                               | 769  | 101 | Inf |
| KIAA1280   | uc010nds.1                                                                                               | 991  | 171 | Inf |
| WWC3       | uc004csx.2                                                                                               | 991  | 171 | Inf |
| GYG2       | uc004cqw.1                                                                                               | 257  | 50  | Inf |
| SURF6      | uc004cdb.2                                                                                               | 288  | 149 | Inf |
| TOR1A      | uc004bvl.1                                                                                               | 174  | 153 | Inf |
| CRAT       | uc004bxg.1                                                                                               | 399  | 49  | Inf |
| ANGPTL2    | uc010mxg.1,uc004bqr.1                                                                                    | 447  | 118 | Inf |
| PPP6C      | uc010mww.1,uc004bpg.2,uc010mwv.1                                                                         | 232  | 220 | Inf |
| RBM18      | uc004bma.1                                                                                               | 109  | 106 | Inf |
| NDUFA8     | uc004blv.1                                                                                               | 76   | 86  | Inf |
| ASTN2      | uc004bjv.1,uc004bjp.1,uc004bjq.1,uc004bit.1,uc004bjs.1,uc004bjr.1                                        | 150  | 111 | Inf |
| DFNB31     | uc004bix.1                                                                                               | 424  | 59  | Inf |
| FKBP15     | uc004bqt.2,uc004bqs.2                                                                                    | 144  | 99  | Inf |
| KIAA0674   | uc010mut.1                                                                                               | 171  | 99  | Inf |
| C9orf80    | uc004bqq.1                                                                                               | 80   | 91  | Inf |
| PTPN3      | uc010mtv.1                                                                                               | 344  | 34  | Inf |
| ABCA1      | uc004bcm.2,uc004bcl.1                                                                                    | 408  | 225 | Inf |
| KIAA0573   | uc010msz.1                                                                                               | 350  | 131 | Inf |
| ERP44      | uc004bam.1                                                                                               | 350  | 131 | Inf |
| ANKS6      | uc004ayt.1                                                                                               | 484  | 41  | Inf |
| HIATL2     | uc004aws.1                                                                                               | 117  | 31  | Inf |
| CDC14B     | uc004awi.1                                                                                               | 446  | 120 | Inf |
| hfrC       | uc004awe.1,uc004awd.1                                                                                    | 263  | 163 | Inf |
| SLC35D2    | uc010msf.1,uc010mse.1,uc004awc.1                                                                         | 488  | 163 | Inf |
| FAM120AOS  | uc004atu.2                                                                                               | 144  | 258 | Inf |
| IPPK       | uc004asl.1                                                                                               | 863  | 175 | Inf |
| CCRK       | uc004apu.1,uc004apt.1,uc004aps.1,uc004apr.1                                                              | 113  | 90  | Inf |
| C9orf64    | uc004anc.1,uc004anb.1                                                                                    | 145  | 141 | Inf |
| GKAP1      | uc004amz.1,uc004amy.1                                                                                    | 236  | 76  | Inf |
| UBQLN1     | uc004amw.1,uc004amv.1                                                                                    | 175  | 217 | Inf |
| PRUNE2     | uc004akn.1,uc010mpk.1                                                                                    | 343  | 146 | Inf |
| TRPM6      | uc004ajv.1,uc010mpe.1,uc010mpd.1,uc010mpc.1,uc004ajk.1,uc004ajl.1                                        | 235  | 106 | Inf |
| FAM108B1   | uc004aim.1,uc004ail.1                                                                                    | 151  | 270 | Inf |
| MCART1     | uc004aau.1,uc004aav.1                                                                                    | 81   | 194 | Inf |
| FBXO10     | uc004aab.1                                                                                               | 584  | 163 | Inf |
| PAX5       | uc010mls.1,uc010mlr.1,uc010mlp.1,uc010mlo.1,uc003zzo.1                                                   | 2969 | 136 | Inf |
| RNF38      | uc003zzi.1,uc003zzi.1,uc003zzk.1,uc003zzm.1,uc003zzh.1,uc003zzj.1                                        | 271  | 322 | Inf |
| KIAA1539   | uc003zwm.1,uc003zwl.1                                                                                    | 102  | 84  | Inf |
| FLJ00135   | uc003zwa.1                                                                                               | 113  | 104 | Inf |
| FLJ00350   | uc003zwc.1                                                                                               | 113  | 104 | Inf |
| PIGO       | uc003zwe.1,uc003zwd.1,uc003zwf.1                                                                         | 113  | 104 | Inf |
| VCP        | uc010mki.1,uc010mkh.1,uc003zvy.2                                                                         | 95   | 128 | Inf |
| UBAP2      | uc003ztr.1,uc003ztr.1                                                                                    | 862  | 89  | Inf |
| APTX       | uc003zrr.1,uc003zru.1,uc003zrq.1,uc003zrp.1,uc003zrt.1,uc003zro.1,uc003zry.1,uc003zrw.1,uc003zrx.1,uc010 | 107  | 63  | Inf |
| NDUFB6     | uc003zrf.1,uc003zre.1                                                                                    | 158  | 53  | Inf |
| TOPORS     | uc003zrc.1,uc003zrb.1                                                                                    | 82   | 217 | Inf |
| DDX58      | uc010mjk.1,uc003zra.1                                                                                    | 154  | 58  | Inf |
| ELAVL2     | uc003zpw.1,uc003zpv.1,uc003zpu.1                                                                         | 685  | 111 | Inf |
| CDKN2A     | uc003zpj.1,uc003zpk.1                                                                                    | 165  | 123 | Inf |
| PSIP1      | uc003zpz.2                                                                                               | 136  | 139 | Inf |
| TTC39B     | uc010mif.1,uc010mie.1,uc003zlr.1                                                                         | 466  | 171 | Inf |
| FREM1      | uc003zll.1,uc003zlm.1                                                                                    | 106  | 25  | Inf |
| ZDHHC21    | uc003zlg.1,uc003zli.1                                                                                    | 218  | 142 | Inf |
| NFIB       | uc003zlf.1,uc003zle.1                                                                                    | 507  | 248 | Inf |
| PTPRD      | uc003zkn.1,uc003zko.1,uc003zkm.1,uc003zkl.1,uc003zkk.1                                                   | 3789 | 75  | Inf |
| KIAA2026   | uc003zqi.2                                                                                               | 152  | 205 | Inf |
| ERMP1      | uc003zjn.1,uc010mhs.1,uc003zjm.1                                                                         | 80   | 194 | Inf |
| C9orf68    | uc003zim.2,uc010mhj.1                                                                                    | 223  | 47  | Inf |
| RFX3       | uc010mhe.1,uc010mhd.1,uc003zhs.1,uc003zhr.1                                                              | 427  | 140 | Inf |
| C9orf7     | uc004cec.1,uc010nan.1,uc004ced.1                                                                         | 332  | 194 | Inf |
| GTF3C5     | uc010mzz.1,uc004cci.2,uc004ccj.2                                                                         | 419  | 149 | Inf |
| GF11B      | uc004cca.1                                                                                               | 348  | 51  | Inf |
| BAT2L      | uc004can.2                                                                                               | 1535 | 30  | Inf |
| EXOSC2     | uc004bzu.2                                                                                               | 77   | 67  | Inf |
| USP20      | uc004byt.1,uc004byr.2,uc004bys.2                                                                         | 1285 | 192 | Inf |
| DKFZp781M1 | uc010myr.1                                                                                               | 568  | 198 | Inf |
| PPP2R4     | uc004bxo.1,uc004bxn.1,uc004bxi.1,uc004bxm.1                                                              | 568  | 198 | Inf |
| PHYHD1     | uc004bwp.2                                                                                               | 221  | 80  | Inf |
| SET        | uc004bvt.2                                                                                               | 622  | 28  | Inf |
| SPTAN1     | uc004bvn.2,uc004bvm.2,uc004bvl.2                                                                         | 1282 | 311 | Inf |
| ODF2       | uc004bve.1,uc004bvc.1,uc004bvb.1,uc004bvd.2                                                              | 460  | 144 | Inf |
| URM1       | uc004buv.1                                                                                               | 319  | 78  | Inf |



|             |                                                                   |      |     |     |
|-------------|-------------------------------------------------------------------|------|-----|-----|
| SLC25A25    | uc004btb.1                                                        | 837  | 187 | Inf |
| STXBP1      | uc004brf.1,uc004brk.1                                             | 822  | 298 | Inf |
| MRRF        | uc010mwa.1,uc004bmc.1,uc004bmb.1                                  | 201  | 108 | Inf |
| TRIM32      | uc004bjw.2,uc004bjx.2                                             | 108  | 122 | Inf |
| ZNF618      | uc004bib.1,uc004bid.1,uc004bic.1                                  | 1395 | 206 | Inf |
| RGS3        | uc010muz.1,uc010mva.1,uc004bhw.1                                  | 399  | 69  | Inf |
| SLC31A1     | uc004bgv.2,uc004bgu.1                                             | 192  | 101 | Inf |
| HSDL2       | uc004bac.1,uc004baa.1                                             | 399  | 190 | Inf |
| DKFZp666L09 | uc004bgb.1                                                        | 399  | 190 | Inf |
| AKAP2       | uc004bem.1                                                        | 650  | 162 | Inf |
| FKTN        | uc004bcs.1,uc004bcr.1                                             | 124  | 74  | Inf |
| SMC2        | uc004bbu.1,uc004bbw.1,uc004bbv.1,uc004bbx.1                       | 80   | 94  | Inf |
| RNF20       | uc004bbn.1                                                        | 89   | 60  | Inf |
| PRG-3       | uc004bbb.1                                                        | 505  | 205 | Inf |
| INVS        | uc010mta.1,uc010mtb.1,uc004bar.1,uc004baq.1,uc004bap.1,uc004bao.1 | 522  | 114 | Inf |
| NR4A3       | uc004bae.1,uc004bai.1,uc004bag.1,uc004baf.1                       | 439  | 288 | Inf |
| TGFBR1      | uc004azd.1,uc004azc.1                                             | 110  | 315 | Inf |
| ANP32B      | uc004aya.1                                                        | 191  | 631 | Inf |
| TDRD7       | uc004axj.1                                                        | 197  | 294 | Inf |
| HABP4       | uc010msh.1,uc010msq.1                                             | 351  | 290 | Inf |
| SYK         | uc004arc.1                                                        | 664  | 36  | Inf |
| S1PR3       | uc004aqe.1                                                        | 267  | 174 | Inf |
| CR613032    | uc004aoh.1                                                        | 82   | 35  | Inf |
| GCNT1       | uc004akf.2,uc010mph.1                                             | 247  | 141 | Inf |
| OSTF1       | uc004aix.2,uc004aiw.2,uc004aiv.2                                  | 222  | 189 | Inf |
| C9orf61     | uc010moo.1,uc010mon.1                                             | 102  | 34  | Inf |
| RG9MTD3     | uc004aak.1,uc004aai.1                                             | 113  | 69  | Inf |
| FRMPD1      | uc004aaq.1                                                        | 631  | 195 | Inf |
| UNC13B      | uc010mkl.1                                                        | 612  | 128 | Inf |
| UNC13B      | uc003zwr.1,uc003zww.1                                             | 799  | 128 | Inf |
| KIAA1045    | uc003zvu.1                                                        | 79   | 238 | Inf |
| IL11RA      | uc003zvi.1                                                        | 108  | 54  | Inf |
| NFX1        | uc010mjr.1,uc003zsr.1,uc003zso.1,uc003zsp.1,uc003zsq.1            | 303  | 90  | Inf |
| MTAP        | uc003zpi.1,uc003zph.1                                             | 1683 | 134 | Inf |
| JMJD2C      | uc010mhv.1,uc003zkg.1,uc003zkh.1                                  | 390  | 277 | Inf |
| KIAA0780    | uc010mhw.1                                                        | 792  | 277 | Inf |
| KANK1       | uc003zqs.1                                                        | 304  | 96  | Inf |
| TRAPPC9     | uc003yvi.1                                                        | 9100 | 86  | Inf |
| LRRC6       | uc010mdu.1,uc003ytk.1                                             | 265  | 143 | Inf |
| TATDN1      | uc010mdm.1,uc003yrf.1,uc003yrd.1                                  | 219  | 103 | Inf |
| DERL1       | uc003ypr.1,uc003ypr.1,uc003ypl.1                                  | 126  | 155 | Inf |
| MRPL13      | uc003yva.1                                                        | 89   | 51  | Inf |
| SAMD12      | uc003yom.2,uc010mda.1                                             | 606  | 112 | Inf |
| EIF3H       | uc003yoa.1                                                        | 290  | 48  | Inf |
| CSMD3       | uc003ynx.2,uc010mox.1,uc003ynv.1,uc003ynu.1                       | 396  | 55  | Inf |
| NUDCD1      | uc010mcl.1,uc003ynb.2                                             | 224  | 111 | Inf |
| EIF3E       | uc010mci.1,uc003ymv.1,uc003ymu.1                                  | 125  | 59  | Inf |
| PABPC1      | uc003yit.1,uc003yis.1                                             | 100  | 275 | Inf |
| SNX31       | uc003yir.1                                                        | 360  | 146 | Inf |
| ANKRD46     | uc003yim.2,uc003yip.1,uc003yin.1,uc003yjo.1                       | 166  | 140 | Inf |
| STK3        | uc003yio.1                                                        | 1837 | 300 | Inf |
| RPL30       | uc010mbk.1                                                        | 82   | 81  | Inf |
| KIAA1429    | uc003ygp.1,uc003ygo.1                                             | 199  | 69  | Inf |
| FAM82B      | uc003ydu.1                                                        | 117  | 103 | Inf |
| SNX16       | uc003yco.1,uc003ycn.1                                             | 76   | 130 | Inf |
| MRPS28      | uc003ybo.1,uc003ybp.1                                             | 232  | 106 | Inf |
| TPD52       | uc003ybt.1,uc003ybs.1                                             | 510  | 193 | Inf |
| MSC         | uc003yxv.1                                                        | 124  | 197 | Inf |
| EYA1        | uc003xyv.1,uc003xyu.1                                             | 438  | 39  | Inf |
| COPS5       | uc003xxd.1,uc003xxf.1,uc003xxe.1                                  | 86   | 37  | Inf |
| PDE7A       | uc003xvq.1,uc003xvr.1                                             | 322  | 141 | Inf |
| ARMC1       | uc003xvl.1                                                        | 190  | 85  | Inf |
| PLAG1       | uc010lvi.1,uc010lvi.1,uc003xsr.2                                  | 234  | 202 | Inf |
| TCEA1       | uc003xrv.1,uc003xru.1                                             | 248  | 153 | Inf |
| PLAT        | uc003xot.2,uc003xos.2                                             | 581  | 37  | Inf |
| ZMAT4       | uc003xns.1,uc003xnr.1                                             | 1324 | 56  | Inf |
| FLJ43582    | uc003xlx.1                                                        | 142  | 33  | Inf |
| FGFR1       | uc003xlt.2                                                        | 566  | 31  | Inf |
| DUSP26      | uc003xiq.1,uc003xip.1                                             | 110  | 93  | Inf |
| C8orf41     | uc003xjl.2,uc003xjm.2                                             | 75   | 40  | Inf |
| GTF2E2      | uc003xiq.1                                                        | 363  | 193 | Inf |
| INTS9       | uc003xhb.1,uc003xha.1                                             | 316  | 51  | Inf |
| PNMA2       | uc003xez.2                                                        | 77   | 186 | Inf |
| TNFRSF10A   | uc003xda.1                                                        | 241  | 158 | Inf |
| CSGALNACT   | uc003wzf.1                                                        | 1289 | 25  | Inf |
| ASH1        | uc003wym.2,uc003wyl.2,uc003wyo.2,uc003wyn.2                       | 137  | 155 | Inf |
| MTMR7       | uc003wxm.1                                                        | 575  | 120 | Inf |
| SGCZ        | uc003wwq.1                                                        | 2273 | 171 | Inf |
| DLC1        | uc003wwl.1                                                        | 1245 | 118 | Inf |
| LOC649305   | uc003wwc.2                                                        | 223  | 67  | Inf |
| PINX1       | uc003wti.2,uc003wth.2                                             | 630  | 119 | Inf |
| ERICH1      | uc003wpe.1,uc003wph.1                                             | 3194 | 151 | Inf |
| ZNF707      | uc003yzh.2,uc003yzf.2,uc010mfi.1,uc010mfh.1,uc003yze.2            | 468  | 109 | Inf |
| PHF20L1     | uc003yts.1,uc003ytt.1                                             | 76   | 159 | Inf |
| EFR3A       | uc003yte.1                                                        | 166  | 276 | Inf |
| MTBP        | uc003ytc.1                                                        | 153  | 39  | Inf |
| TTC35       | uc003ymw.1                                                        | 103  | 134 | Inf |
| TM7SF4      | uc003yvx.1                                                        | 91   | 29  | Inf |
| C8orf47     | uc003yih.1                                                        | 115  | 153 | Inf |
| CPNE3       | uc003ydv.1                                                        | 109  | 126 | Inf |
| WWP1        | uc003ydt.1                                                        | 394  | 221 | Inf |
| CHMP4C      | uc003yvl.1                                                        | 83   | 75  | Inf |
| PKIA        | uc003yvb.1,uc003yba.1                                             | 120  | 140 | Inf |
| CRISPLD1    | uc003yan.1                                                        | 83   | 131 | Inf |
| AK056720    | uc003xzl.2                                                        | 237  | 43  | Inf |
| SULF1       | uc003xyq.2,uc003xyf.2                                             | 771  | 48  | Inf |
| C8orf46     | uc003xwg.1                                                        | 253  | 33  | Inf |
| DKFZp451J08 | uc003xuz.1,uc003xva.1,uc010lys.1                                  | 144  | 197 | Inf |

|            |                                                                              |      |     |     |
|------------|------------------------------------------------------------------------------|------|-----|-----|
| YTHDF3     | uc003xuy.1                                                                   | 144  | 200 | Inf |
| RLBP1L1    | uc003xug.1,uc010lyp.1,uc003xuh.1                                             | 185  | 63  | Inf |
| RP1        | uc003xsc.1                                                                   | 249  | 30  | Inf |
| SNTG1      | uc010lxz.1,uc003xqs.1                                                        | 1715 | 29  | Inf |
| KIAA0146   | uc010lxs.1,uc003xqe.1,uc003xqd.1                                             | 2158 | 186 | Inf |
| FNTA       | uc003xpu.1,uc003xpt.1,uc003xps.1                                             | 126  | 228 | Inf |
| POLB       | uc003xpa.1,uc003xoz.1                                                        | 149  | 69  | Inf |
| LETM2      | uc003xlo.1,uc003xln.1,uc003xlm.1,uc003xll.1                                  | 122  | 124 | Inf |
| DCTN6      | uc003xhy.1                                                                   | 122  | 76  | Inf |
| HMBOX1     | uc003xhc.2,uc010lvd.1,uc003xhd.2,uc003xhe.1                                  | 421  | 114 | Inf |
| ELP3       | uc003xgo.2                                                                   | 347  | 54  | Inf |
| PTK2B      | uc003xfq.1,uc003xfp.1                                                        | 1017 | 95  | Inf |
| DKFZp762K0 | uc003xeq.1                                                                   | 175  | 116 | Inf |
| CDCA2      | uc003xep.1                                                                   | 175  | 116 | Inf |
| TNFRSF10C  | uc003xcy.1                                                                   | 88   | 71  | Inf |
| XPO7       | uc003xaa.2,uc010lti.1                                                        | 328  | 255 | Inf |
| ATP6V1B2   | uc003wzp.1                                                                   | 87   | 124 | Inf |
| INTS10     | uc003wzj.1                                                                   | 182  | 119 | Inf |
| PCM1       | uc003wyg.2,uc003wyh.2,uc010lta.1,uc003wyi.2                                  | 82   | 212 | Inf |
| TUSC3      | uc003wwr.1,uc003wwy.1,uc003wws.1,uc003www.1,uc003www.1,uc003www.1,uc003wvt.1 | 429  | 129 | Inf |
| FDF1       | uc003wuh.1                                                                   | 481  | 29  | Inf |
| MTMR9      | uc010lrx.1,uc003wvm.1                                                        | 118  | 128 | Inf |
| AGPAT5     | uc003wqo.1                                                                   | 220  | 245 | Inf |
| CLN8       | uc003wpo.2                                                                   | 422  | 194 | Inf |
| FBXO25     | uc003woz.1,uc003wov.1,uc003wox.1                                             | 264  | 97  | Inf |
| FAM62B     | uc003woc.1,uc003wob.1,uc003wod.1                                             | 1117 | 31  | Inf |
| SMARCD3    | uc003wju.1                                                                   | 1228 | 124 | Inf |
| FAM115A    | uc003wdp.1,uc003wdo.1                                                        | 253  | 109 | Inf |
| SLC37A3    | uc010lnh.1,uc003vvp.1,uc003vvo.1                                             | 543  | 152 | Inf |
| CREB3L2    | uc003vty.2,uc003vtb.1,uc003vtv.1                                             | 487  | 116 | Inf |
| PTN        | uc003vtr.1,uc010lmx.1,uc003vtd.1                                             | 287  | 32  | Inf |
| DKFZp586B0 | uc010lmq.1                                                                   | 251  | 26  | Inf |
| WDR91      | uc003vsp.1                                                                   | 289  | 214 | Inf |
| C7orf49    | uc003vsh.1                                                                   | 280  | 184 | Inf |
| UBE2H      | uc003vpg.1,uc003vpf.1                                                        | 683  | 149 | Inf |
| TNPO3      | uc010liz.1,uc010liv.1,uc003vol.1                                             | 372  | 90  | Inf |
| TRN-SR     | uc003vom.1                                                                   | 372  | 90  | Inf |
| RBM28      | uc003vmp.2                                                                   | 181  | 78  | Inf |
| POT1       | uc003vlo.1,uc003vlm.1                                                        | 189  | 68  | Inf |
| IQUB       | uc003vko.1                                                                   | 100  | 69  | Inf |
| CTTNBP2    | uc003vif.1                                                                   | 478  | 333 | Inf |
| WNT2       | uc003via.1,uc003viz.1                                                        | 276  | 187 | Inf |
| COG5       | uc003vee.1,uc003ved.1,uc003vec.1                                             | 1066 | 106 | Inf |
| SLC26A5    | uc003vbv.1,uc003vbu.1,uc003vzb.1,uc003vbt.1                                  | 349  | 193 | Inf |
| ZRF1       | uc003vbp.1                                                                   | 190  | 106 | Inf |
| DNAJC2     | uc010lix.1,uc003vbo.1                                                        | 190  | 106 | Inf |
| C7orf18    | uc003vbf.2                                                                   | 90   | 173 | Inf |
| NAPEPLD    | uc003vbd.2,uc003vbc.2                                                        | 180  | 173 | Inf |
| ALKBH4     | uc003vuzm.1,uc003vuzl.1                                                      | 231  | 200 | Inf |
| RABL5      | uc003vuy.1,uc003vuy.1                                                        | 90   | 139 | Inf |
| LRCH4      | uc003vuj.1                                                                   | 558  | 147 | Inf |
| STAG3OS    | uc003vua.2,uc003vuc.1                                                        | 723  | 96  | Inf |
| DKFZp761F1 | uc010lqg.1                                                                   | 121  | 56  | Inf |
| GAL3ST4    | uc003vutu.1                                                                  | 121  | 56  | Inf |
| BAIAP2L1   | uc003vupj.1                                                                  | 1665 | 181 | Inf |
| TECPR1     | uc003vuph.1,uc003vupg.1                                                      | 958  | 158 | Inf |
| CALCR      | uc003umw.2,uc003umv.1,uc003umu.1                                             | 179  | 96  | Inf |
| CDK6       | uc003ume.1                                                                   | 485  | 253 | Inf |
| PEX1       | uc010lev.1,uc003uly.1                                                        | 106  | 184 | Inf |
| KRIT1      | uc003ulq.1                                                                   | 135  | 40  | Inf |
| SEMA3E     | uc003uhj.1                                                                   | 502  | 26  | Inf |
| STYXL1     | uc003uek.2,uc010ldh.1,uc003uej.2,uc003uem.1,uc003uel.1                       | 516  | 132 | Inf |
| MKSTYX     | uc010ldg.1                                                                   | 508  | 132 | Inf |
| HIP1       | uc003uds.1                                                                   | 2401 | 163 | Inf |
| POM121C    | uc003udk.2                                                                   | 192  | 26  | Inf |
| MLXIPL     | uc003typ.1,uc003tyn.1,uc003tym.1,uc003tyl.1,uc003tyk.1                       | 586  | 251 | Inf |
| BAZ1B      | uc003tyc.1                                                                   | 525  | 266 | Inf |
| LOC401365  | uc010lac.1                                                                   | 858  | 177 | Inf |
| TNS3       | uc010kvo.1,uc003tnv.1                                                        | 2054 | 40  | Inf |
| DDX56      | uc003tif.1                                                                   | 86   | 119 | Inf |
| NPC1L1     | uc003tla.1                                                                   | 102  | 44  | Inf |
| POLR2J2    | uc003tjd.1                                                                   | 153  | 40  | Inf |
| C7orf44    | uc003tip.1,uc003tiq.1,uc003tio.1,uc003tin.1                                  | 311  | 91  | Inf |
| DPY19L2P1  | uc003teq.1                                                                   | 124  | 57  | Inf |
| CRH2R      | uc010kvj.1                                                                   | 288  | 213 | Inf |
| CRHR2      | uc010kvx.1,uc010kvw.1,uc003tbn.2                                             | 288  | 213 | Inf |
| KIAA0644   | uc003szt.1                                                                   | 227  | 378 | Inf |
| SKAP2      | uc003svc.1                                                                   | 324  | 69  | Inf |
| IGF2BP3    | uc003swg.1                                                                   | 879  | 265 | Inf |
| DRCTNNB1A  | uc003svn.2                                                                   | 100  | 158 | Inf |
| FAM126A    | uc003svm.2                                                                   | 100  | 158 | Inf |
| MGC87042   | uc010kum.1,uc003svh.2                                                        | 197  | 30  | Inf |
| DKFZp761E0 | uc003sty.2                                                                   | 150  | 152 | Inf |
| KIAA0713   | uc003stx.1,uc003stvw.1,uc010kuc.1                                            | 164  | 152 | Inf |
| SNX13      | uc003stv.1                                                                   | 344  | 152 | Inf |
| ETV1       | uc003ssw.2                                                                   | 264  | 33  | Inf |
| THSD7A     | uc003ssf.2                                                                   | 686  | 99  | Inf |
| ICA1       | uc003srs.1,uc003srp.2,uc003srr.1,uc003sro.2,uc003srm.2,uc003sra.1,uc003srm.1 | 281  | 202 | Inf |
| DAGLB      | uc003sqd.2                                                                   | 1291 | 194 | Inf |
| KDEL2      | uc003saf.2,uc003sqe.2                                                        | 182  | 194 | Inf |
| RNF216     | uc003soz.1,uc003soy.1,uc003sox.1                                             | 1255 | 162 | Inf |
| C7orf27    | uc003smj.1,uc003smi.1                                                        | 298  | 157 | Inf |
| KIAA0010   | uc003wni.2                                                                   | 627  | 30  | Inf |
| NUB1       | uc003wjx.1,uc003wjjw.1                                                       | 497  | 161 | Inf |
| DKFZp761E2 | uc003wjk.1                                                                   | 167  | 74  | Inf |
| ZNF282     | uc003wfm.1                                                                   | 910  | 230 | Inf |
| ZNF398     | uc003wfk.1                                                                   | 1050 | 184 | Inf |
| EPHB6      | uc003wbt.1                                                                   | 322  | 29  | Inf |

|             |                                                                                                    |      |     |     |
|-------------|----------------------------------------------------------------------------------------------------|------|-----|-----|
| CHRM2       | uc003vtm.1,uc003vto.1,uc003vtl.1,uc003vtg.1,uc003vtn.1,uc003vtk.1,uc003vtj.1,uc003vtf.1,uc003vti.1 | 316  | 262 | Inf |
| CALD1       | uc003vsd.1,uc003vsc.1                                                                              | 375  | 36  | Inf |
| BPGM        | uc003vrw.1,uc003vrv.1                                                                              | 85   | 41  | Inf |
| EXOC4       | uc003vri.2,uc003vri.1,uc003vrk.1                                                                   | 605  | 25  | Inf |
| FAM40B      | uc003vow.1,uc003vox.1                                                                              | 181  | 198 | Inf |
| CCDC136     | uc003vny.1                                                                                         | 114  | 27  | Inf |
| CALU        | uc003vns.1,uc003vnr.1,uc003vng.1                                                                   | 132  | 145 | Inf |
| METTL2B     | uc003vng.1,uc003vnf.1                                                                              | 131  | 46  | Inf |
| SND1        | uc003vni.1                                                                                         | 2821 | 178 | Inf |
| CFTR        | uc003vid.1                                                                                         | 331  | 77  | Inf |
| HBP1        | uc003vdy.1                                                                                         | 124  | 187 | Inf |
| RINT1       | uc010lji.1,uc003vda.1                                                                              | 260  | 96  | Inf |
| DKFZp586i12 | uc010liw.1,uc010liv.1,uc003vbm.1                                                                   | 77   | 93  | Inf |
| PMPCB       | uc003vbk.1,uc003vbl.1                                                                              | 76   | 93  | Inf |
| PRKRIP1     | uc003uzh.2                                                                                         | 434  | 72  | Inf |
| SERPINE1    | uc003uxt.2                                                                                         | 175  | 52  | Inf |
| TRIM56      | uc003uxr.2,uc003uxq.1                                                                              | 317  | 86  | Inf |
| FBX24       | uc003uvm.1                                                                                         | 228  | 178 | Inf |
| FBXO24      | uc003uwl.1,uc003uvm.1                                                                              | 154  | 178 | Inf |
| ZNF789      | uc010lfw.1,uc003uqq.1                                                                              | 122  | 94  | Inf |
| MYH16       | uc003upw.1                                                                                         | 361  | 27  | Inf |
| LMTK2       | uc003upd.1                                                                                         | 1385 | 183 | Inf |
| KIAA1861    | uc003ump.1                                                                                         | 145  | 38  | Inf |
| CCDC132     | uc003umo.1                                                                                         | 145  | 38  | Inf |
| PFTK1       | uc003ukv.1                                                                                         | 1274 | 294 | Inf |
| GTPBP10     | uc003uko.1,uc003ukn.1,uc003ukm.1                                                                   | 99   | 64  | Inf |
| ZNF804B     | uc003uju.1                                                                                         | 791  | 160 | Inf |
| ADAM22      | uc003uji.1,uc003uij.1,uc003ujp.1,uc003ujl.1,uc003ujk.1,uc003ujo.1,uc003ujm.1,uc003ujn.1            | 387  | 194 | Inf |
| PHTF2       | uc003uqp.2,uc010ldv.1,uc003uqo.2,uc003uqg.2                                                        | 480  | 206 | Inf |
| MDH2        | uc003uep.1,uc003ueo.1                                                                              | 420  | 125 | Inf |
| RHBDD2      | uc003udw.1,uc003udv.1                                                                              | 155  | 90  | Inf |
| ELN         | uc003tzq.1,uc003tzp.1,uc003tzo.1,uc003tzz.1,uc003tzy.1,uc003tzx.1,uc003tzv.1,uc003tzu.1,uc003tz    | 757  | 115 | Inf |
| POM121      | uc010lam.1,uc003twj.1                                                                              | 399  | 25  | Inf |
| AUTS2       | uc003tvv.2,uc003tvx.2,uc003tvw.2                                                                   | 1754 | 258 | Inf |
| STAG3L4     | uc003tvt.2                                                                                         | 89   | 151 | Inf |
| TYW1        | uc003tvn.1                                                                                         | 715  | 29  | Inf |
| C7orf42     | uc003tvl.1,uc003tvk.1                                                                              | 367  | 32  | Inf |
| TPST1       | uc010laa.1,uc010kzz.1,uc003tuw.1                                                                   | 548  | 197 | Inf |
| VKORC1L1    | uc003tul.1                                                                                         | 352  | 160 | Inf |
| ZNF273      | uc003tto.1,uc003ttn.1                                                                              | 85   | 53  | Inf |
| ZNF138      | uc003tth.1,uc010kzs.1,uc003ttg.1                                                                   | 96   | 52  | Inf |
| ZNF107      | uc003tte.1,uc003ttt.1                                                                              | 223  | 41  | Inf |
| DKFZP566i10 | uc003trv.1                                                                                         | 190  | 101 | Inf |
| SUMF2       | uc003trt.1,uc003trs.1,uc003trr.1,uc003trq.1,uc003trp.1                                             | 190  | 101 | Inf |
| CMAP        | uc003tin.2,uc003tir.2                                                                              | 171  | 117 | Inf |
| DBNL        | uc003tip.2,uc003tiq.2,uc003tjp.2                                                                   | 238  | 117 | Inf |
| RALA        | uc003thd.1                                                                                         | 261  | 232 | Inf |
| BMPER       | uc003tdw.1                                                                                         | 828  | 196 | Inf |
| BBS9        | uc003tdq.1,uc003tdp.1,uc003tdo.1,uc003tdn.1                                                        | 784  | 74  | Inf |
| ADCYAP1R1   | uc003tcf.1                                                                                         | 125  | 29  | Inf |
| GHRHR       | uc003tbw.1,uc003tbx.1                                                                              | 114  | 36  | Inf |
| FAPP2       | uc003tao.1                                                                                         | 226  | 197 | Inf |
| PLEKHA8     | uc003tam.1,uc003tap.1,uc003tan.1                                                                   | 115  | 197 | Inf |
| TAX1BP1     | uc003szl.1,uc003szk.1                                                                              | 161  | 127 | Inf |
| CCDC126     | uc003swm.1,uc003swm.1,uc003swl.1                                                                   | 145  | 57  | Inf |
| KLHL7       | uc003svs.2,uc003svr.2                                                                              | 234  | 122 | Inf |
| SPAN13      | uc003stq.1                                                                                         | 105  | 168 | Inf |
| ZDHC4       | uc003sqm.1,uc003sql.1,uc003sqj.1,uc003sqh.1,uc003sqk.1                                             | 87   | 97  | Inf |
| JTV1        | uc003spo.1                                                                                         | 138  | 135 | Inf |
| EIF3B       | uc003siz.1,uc003sly.1,uc003slx.1                                                                   | 109  | 225 | Inf |
| UNCX        | uc003skq.1                                                                                         | 386  | 265 | Inf |
| GPER        | uc003ska.1,uc003sjz.1                                                                              | 383  | 78  | Inf |
| UNC84A      | uc010ksb.1,uc003sif.1                                                                              | 1388 | 46  | Inf |
| THBS2       | uc003qwt.1                                                                                         | 1388 | 57  | Inf |
| PARK2       | uc010kke.1,uc003qtz.2,uc003qtv.2,uc003qatx.2                                                       | 7523 | 196 | Inf |
| RSPH3       | uc010kiu.1,uc003qrx.1                                                                              | 103  | 165 | Inf |
| EZR         | uc003qrt.2                                                                                         | 607  | 137 | Inf |
| SERAC1      | uc003qrc.1                                                                                         | 303  | 180 | Inf |
| CNKSR3      | uc003qpy.1                                                                                         | 803  | 297 | Inf |
| SYNE1       | uc010kiy.1                                                                                         | 102  | 75  | Inf |
| ZC3H12D     | uc010kid.1,uc003amm.2                                                                              | 915  | 56  | Inf |
| HIVEP2      | uc003qid.1                                                                                         | 856  | 211 | Inf |
| AX747618    | uc003qid.1                                                                                         | 226  | 39  | Inf |
| MAP         | uc010kqv.1                                                                                         | 585  | 26  | Inf |
| MAP7        | uc010kqr.1,uc010kqs.1,uc010kqt.1,uc010kqq.1,uc003qha.1,uc003qqz.1                                  | 664  | 26  | Inf |
| DKFZp686H1  | uc003qep.2                                                                                         | 357  | 43  | Inf |
| SGK1        | uc003qeo.2                                                                                         | 1386 | 43  | Inf |
| SLC2A12     | uc003qem.1                                                                                         | 271  | 43  | Inf |
| STX7        | uc003qdq.2                                                                                         | 160  | 103 | Inf |
| ARHGAP18    | uc003qbr.1                                                                                         | 440  | 44  | Inf |
| C6orf174    | uc003qbg.2,uc003qbf.1                                                                              | 246  | 61  | Inf |
| ECHDC1      | uc010kez.1,uc003qav.2,uc010kev.1,uc003qaz.2                                                        | 87   | 115 | Inf |
| ZUFSP       | uc003pxf.1                                                                                         | 76   | 51  | Inf |
| LAMA4       | uc003pvw.2,uc003pvu.2,uc003pvt.2,uc003pvv.2                                                        | 102  | 113 | Inf |
| TRAF3IP2    | uc010kdx.1,uc010kdw.1,uc003pvq.1,uc003pvf.1,uc003pve.1                                             | 220  | 34  | Inf |
| DDO         | uc003pud.1,uc003puc.1                                                                              | 280  | 25  | Inf |
| RTN4IP1     | uc003prk.1                                                                                         | 251  | 80  | Inf |
| ASCC3       | uc003pal.2,uc003pak.1                                                                              | 298  | 153 | Inf |
| USP45       | uc003ppz.1,uc003pqa.1,uc010kca.1,uc003ppx.1                                                        | 139  | 168 | Inf |
| SFRS18      | uc003ppq.2,uc003ppp.2,uc003ppo.2                                                                   | 116  | 55  | Inf |
| AKIRIN2     | uc003pmk.1                                                                                         | 135  | 200 | Inf |
| KIAA1009    | uc003pkk.2,uc003pkj.2,uc010kbp.1                                                                   | 85   | 61  | Inf |
| UBE2CBP     | uc003pip.1                                                                                         | 370  | 84  | Inf |
| IBTK        | uc003pjm.1,uc003pjl.1                                                                              | 206  | 116 | Inf |
| KIAA1417    | uc010kbi.1                                                                                         | 246  | 116 | Inf |
| LCA5        | uc003pix.1,uc003piy.1                                                                              | 92   | 80  | Inf |
| SLC17A5     | uc003phn.2                                                                                         | 393  | 163 | Inf |
| C6orf150    | uc003pqx.1                                                                                         | 128  | 191 | Inf |

|            |                                                                   |      |     |     |
|------------|-------------------------------------------------------------------|------|-----|-----|
| B3GAT2     | uc003pfb.2,uc003pfb.1                                             | 318  | 408 | Inf |
| COL9A1     | uc003pfe.2                                                        | 217  | 34  | Inf |
| LMBRD1     | uc010kal.1,uc003pfa.1                                             | 200  | 64  | Inf |
| HMGCLL1    | uc010jzx.1,uc003pco.1,uc003pcn.1                                  | 137  | 70  | Inf |
| C6orf138   | uc003ozf.2,uc003oze.2                                             | 253  | 102 | Inf |
| GPR116     | uc003oyr.2,uc003oyp.2,uc003oyo.2                                  | 166  | 42  | Inf |
| RCAN2      | uc003oyb.1                                                        | 195  | 28  | Inf |
| NFKBIE     | uc003oxe.1                                                        | 77   | 152 | Inf |
| TRERF1     | uc003osc.1,uc003osb.1,uc003ose.1,uc003osd.1                       | 1689 | 34  | Inf |
| USP49      | uc003ori.1                                                        | 620  | 161 | Inf |
| FRS3       | uc003orc.1                                                        | 171  | 143 | Inf |
| MOCOS1     | uc003ope.2,uc003opc.2,uc003opb.2,uc003opa.2,uc003opd.2            | 300  | 74  | Inf |
| KCNK5      | uc003oon.1                                                        | 444  | 207 | Inf |
| BTBD9      | uc010iwx.1,uc003ooa.2                                             | 1895 | 145 | Inf |
| C6orf129   | uc003ont.1                                                        | 237  | 38  | Inf |
| TMEM217    | uc003onm.2,uc010jws.1,uc010jwr.1,uc003onl.1                       | 169  | 78  | Inf |
| PPL1       | uc003omu.1                                                        | 122  | 77  | Inf |
| STK38      | uc003omi.1,uc003omh.1                                             | 258  | 97  | Inf |
| AK309286   | uc010iqw.1                                                        | 226  | 63  | Inf |
| DCDC2      | uc003ndx.1                                                        | 424  | 87  | Inf |
| DTNBP1     | uc010jph.1,uc003nbp.1,uc003nbn.1,uc003nbl.1                       | 579  | 226 | Inf |
| CCDC90A    | uc003nbd.1                                                        | 106  | 249 | Inf |
| GFOD1      | uc003nas.1                                                        | 781  | 45  | Inf |
| NEDD9      | uc003mzx.1,uc003mzv.1                                             | 126  | 30  | Inf |
| MAK        | uc003mzm.1                                                        | 435  | 102 | Inf |
| F13A1      | uc003mwv.1                                                        | 530  | 57  | Inf |
| TBP        | uc003qxu.1,uc003qxt.1                                             | 77   | 86  | Inf |
| PACRG      | uc003quc.1,uc003qub.1,uc003qua.1                                  | 4487 | 137 | Inf |
| GTF2H5     | uc003qrd.1                                                        | 109  | 183 | Inf |
| OPRM1      | uc010kif.1,uc003qpq.1,uc003qpt.1,uc003qpo.1,uc003qpr.1,uc003qpn.1 | 235  | 70  | Inf |
| C6orf97    | uc003qol.1                                                        | 594  | 219 | Inf |
| C6orf211   | uc003qok.1                                                        | 89   | 171 | Inf |
| C6orf103   | uc003qlp.1,uc010khx.1                                             | 475  | 64  | Inf |
| DREG       | uc003qix.2                                                        | 107  | 250 | Inf |
| GPR126     | uc010khf.1,uc010khe.1,uc010khd.1,uc010khc.1                       | 230  | 250 | Inf |
| VTA1       | uc003qiw.1                                                        | 148  | 69  | Inf |
| TBPL1      | uc003qel.1                                                        | 112  | 137 | Inf |
| ENPP1      | uc003qcx.2                                                        | 267  | 203 | Inf |
| ENPP3      | uc003qcu.2                                                        | 295  | 73  | Inf |
| LAMA2      | uc010kfe.1,uc003qbo.1,uc003qbn.1                                  | 1397 | 53  | Inf |
| RSPO3      | uc003qas.1,uc003qar.1                                             | 106  | 336 | Inf |
| TRMT11     | uc010kev.1,uc003qam.1                                             | 97   | 95  | Inf |
| NCOA7      | uc003qae.2,uc010kes.1                                             | 773  | 27  | Inf |
| IBRDC1     | uc003pzz.1                                                        | 273  | 297 | Inf |
| NKAIN2     | uc003pzn.1,uc003pzo.1                                             | 1378 | 248 | Inf |
| TCBA1      | uc010keq.1,uc003pzp.1                                             | 1624 | 248 | Inf |
| PKIB       | uc003pyz.1                                                        | 758  | 79  | Inf |
| CDC40      | uc003pua.1                                                        | 92   | 50  | Inf |
| FIG4       | uc003ptt.2                                                        | 370  | 74  | Inf |
| QRSL1      | uc003prl.1,uc003prm.1                                             | 119  | 80  | Inf |
| AIM1       | uc003prh.1                                                        | 260  | 317 | Inf |
| PRDM1      | uc003prd.2                                                        | 252  | 78  | Inf |
| KLHL32     | uc003poy.2,uc010kcm.1                                             | 533  | 163 | Inf |
| KIAA1900   | uc003poz.2                                                        | 579  | 163 | Inf |
| ORC3L      | uc003pmi.1,uc003pmh.1,uc003pmg.1                                  | 274  | 95  | Inf |
| DOPEY1     | uc003pis.1                                                        | 195  | 144 | Inf |
| CD109      | uc010kaz.1,uc010kba.1,uc003phq.1,uc003php.1                       | 331  | 161 | Inf |
| KCNQ5      | uc003pgj.2,uc010kat.1,uc003pgk.1                                  | 936  | 285 | Inf |
| SMAP1      | uc010kap.1                                                        | 557  | 79  | Inf |
| FAM135A    | uc003pff.2,uc003pfi.2                                             | 394  | 189 | Inf |
| COL19A1    | uc003pfc.1                                                        | 629  | 170 | Inf |
| BAI3       | uc010kak.1,uc003pev.2                                             | 1087 | 70  | Inf |
| ZNF451     | uc003pdk.1,uc003pdl.2,uc003pdm.1,uc003pdm.1                       | 146  | 88  | Inf |
| EFHC1      | uc003pap.2                                                        | 132  | 95  | Inf |
| PAQR8      | uc003pao.2                                                        | 239  | 246 | Inf |
| CENPQ      | uc003ozh.1                                                        | 90   | 54  | Inf |
| CDC5L      | uc003oxl.1                                                        | 142  | 76  | Inf |
| DKFZp547K1 | uc010jvy.1                                                        | 111  | 184 | Inf |
| TMEM63B    | uc003owg.1,uc003owr.1                                             | 178  | 188 | Inf |
| POLR1C     | uc003ovo.1                                                        | 75   | 83  | Inf |
| TBK1       | uc003ouq.1                                                        | 1329 | 130 | Inf |
| PARC       | uc003ouj.1                                                        | 105  | 90  | Inf |
| KIAA0708   | uc010jyk.1                                                        | 595  | 90  | Inf |
| CUL9       | uc003oul.1,uc003ouk.1                                             | 595  | 90  | Inf |
| PTK7       | uc010jvi.1                                                        | 427  | 55  | Inf |
| KLC4       | uc003otu.1,uc003otv.1                                             | 84   | 93  | Inf |
| FLJ00338   | uc003otb.2,uc003otc.2                                             | 102  | 120 | Inf |
| UNQ1934    | uc003osz.2                                                        | 102  | 120 | Inf |
| CNPY3      | uc003ota.2                                                        | 102  | 120 | Inf |
| UBR2       | uc003osf.2,uc003osq.1                                             | 159  | 67  | Inf |
| BYSL       | uc003ori.1                                                        | 123  | 92  | Inf |
| RNF8       | uc003onr.2,uc003ona.2                                             | 117  | 143 | Inf |
| TBC1D22B   | uc003onn.1                                                        | 356  | 74  | Inf |
| FLJ00276   | uc003ong.2                                                        | 432  | 27  | Inf |
| FGD2       | uc010jwp.1                                                        | 432  | 27  | Inf |
| C6orf89    | uc003omx.1,uc003omw.1                                             | 203  | 58  | Inf |
| AK125083   | uc010jwl.1                                                        | 158  | 41  | Inf |
| MAPK14     | uc003olo.1,uc003olr.1,uc003ola.1,uc003olp.1                       | 216  | 160 | Inf |
| ZKSCAN3    | uc003nlf.2,uc010irc.1,uc003nle.2                                  | 105  | 40  | Inf |
| SCGN       | uc010jyz.1,uc003nfb.1                                             | 123  | 49  | Inf |
| LRRC16A    | uc010jpy.1,uc010jpx.1                                             | 971  | 177 | Inf |
| THEM2      | uc010jpv.1,uc003nek.1                                             | 129  | 131 | Inf |
| NRSN1      | uc010jpa.1                                                        | 85   | 62  | Inf |
| E2F3       | uc003ncz.2,uc003nda.2                                             | 439  | 364 | Inf |
| RNF144B    | uc003nca.1                                                        | 192  | 42  | Inf |
| GMPR       | uc003nbs.1                                                        | 593  | 152 | Inf |
| JARID2     | uc003nbi.1                                                        | 2373 | 104 | Inf |
| HIVEP1     | uc003nac.1                                                        | 662  | 199 | Inf |

|            |                                                                   |      |     |     |
|------------|-------------------------------------------------------------------|------|-----|-----|
| RREB1      | uc003mxe.1                                                        | 1483 | 78  | Inf |
| PRPF4B     | uc003mvv.1                                                        | 143  | 103 | Inf |
| BPHL       | uc003mva.1,uc003muy.1                                             | 421  | 197 | Inf |
| RIPK1      | uc003muw.2,uc010jini.1,uc003muv.2,uc003mux.1                      | 512  | 128 | Inf |
| AX748230   | uc003mnb.1                                                        | 252  | 43  | Inf |
| MGAT1      | uc003mmi.2,uc010jlg.1,uc010jlf.1,uc003mmh.2,uc003mmg.2,uc010jlh.1 | 855  | 29  | Inf |
| HK3        | uc003mfa.1                                                        | 476  | 32  | Inf |
| FBXW11     | uc003mbn.1,uc003mbl.1,uc003mbm.1                                  | 510  | 180 | Inf |
| GABRB2     | uc010jiu.1,uc003lyr.1,uc003lyt.1,uc003lys.1                       | 442  | 182 | Inf |
| RNF145     | uc010jia.1,uc003lxp.2                                             | 113  | 267 | Inf |
| EBF1       | uc003lxl.2,uc010jip.1                                             | 1588 | 138 | Inf |
| HAVCR1     | uc003lwi.2,uc010jii.1                                             | 141  | 29  | Inf |
| DKFZp434C1 | uc010jhu.1                                                        | 289  | 100 | Inf |
| CCDC69     | uc003lta.1                                                        | 289  | 100 | Inf |
| DCTN4      | uc003lsu.1,uc010jhi.1,uc003lsv.1                                  | 186  | 34  | Inf |
| CD74       | uc003lsf.1,uc003lse.1,uc003lsd.1,uc003lsc.1                       | 174  | 33  | Inf |
| ARSI       | uc003lrv.2                                                        | 190  | 162 | Inf |
| CSF1R      | uc003lrm.1                                                        | 699  | 32  | Inf |
| HTR4       | uc003lpo.1,uc003lpk.1,uc003lpi.1,uc003lpl.1,uc003lpm.1,uc003lpl.1 | 263  | 143 | Inf |
| PCDH1      | uc003llq.1,uc003llp.1                                             | 394  | 281 | Inf |
| HARS       | uc010jfu.1,uc003lqw.1,uc003lqv.1                                  | 116  | 93  | Inf |
| PFND1      | uc003lff.1                                                        | 250  | 31  | Inf |
| NRG2       | uc003lev.1,uc003lex.1,uc003lew.1,uc003lev.1                       | 1968 | 223 | Inf |
| DNAJC18    | uc010jff.1,uc003len.1                                             | 153  | 77  | Inf |
| SIL1       | uc003ldp.1,uc003ldo.1                                             | 1357 | 98  | Inf |
| CDC25C     | uc003lcs.1                                                        | 364  | 124 | Inf |
| CDC23      | uc003lcl.1                                                        | 135  | 56  | Inf |
| BRD8       | uc010jer.1                                                        | 89   | 25  | Inf |
| FAM13B     | uc003lca.2,uc003lcb.2,uc003lzb.2                                  | 332  | 213 | Inf |
| KLHL3      | uc010jem.1,uc010jek.1                                             | 318  | 25  | Inf |
| NKIAMRE    | uc010idw.1                                                        | 444  | 88  | Inf |
| SKP1       | uc010jdv.1,uc003kzd.2,uc003kzc.2                                  | 90   | 199 | Inf |
| VDAC1      | uc003kyr.1,uc003kyq.1,uc003kyp.1                                  | 221  | 446 | Inf |
| ZCCHC10    | uc003kyh.1,uc003kyg.1                                             | 180  | 85  | Inf |
| AFF4       | uc003kyf.2,uc003kye.1,uc003kyd.1                                  | 305  | 202 | Inf |
| KIF3A      | uc003kxp.1,uc003kxo.1                                             | 141  | 124 | Inf |
| ZNF608     | uc003kts.1,uc003ktq.1                                             | 579  | 37  | Inf |
| PGGT1B     | uc010jch.1,uc003kqx.2,uc003kqw.2                                  | 85   | 84  | Inf |
| PJA2       | uc003kos.2                                                        | 192  | 135 | Inf |
| GIN1       | uc003koc.1,uc003kob.1,uc003koa.1                                  | 84   | 42  | Inf |
| SLCO4C1    | uc003knm.1                                                        | 95   | 121 | Inf |
| ELL2       | uc003klr.2                                                        | 191  | 258 | Inf |
| FAM172A    | uc003kkm.2,uc010jbd.1                                             | 463  | 75  | Inf |
| TMEM161B   | uc003kic.1                                                        | 142  | 46  | Inf |
| DHFR       | uc003kqx.1,uc003kgy.1                                             | 126  | 159 | Inf |
| TBCA       | uc003kfi.1,uc003kfh.1                                             | 194  | 153 | Inf |
| C5orf37    | uc003keh.2                                                        | 101  | 83  | Inf |
| CENPK      | uc003jtu.1,uc003jtt.1,uc003jts.1                                  | 152  | 80  | Inf |
| ADAMTS6    | uc003jtp.1                                                        | 715  | 27  | Inf |
| SFRS12IP1  | uc003jtk.1                                                        | 89   | 62  | Inf |
| ERCC8      | uc003jism.2,uc003jisl.2                                           | 161  | 49  | Inf |
| PDE4D      | uc003jsc.2,uc003jrz.2,uc003jry.2                                  | 956  | 39  | Inf |
| SLC38A9    | uc010ivy.1,uc003jqf.1                                             | 218  | 68  | Inf |
| FGF10      | uc003jog.1                                                        | 83   | 30  | Inf |
| C5orf28    | uc003jny.1,uc003jnv.2,uc003jnx.1                                  | 93   | 115 | Inf |
| OXCT1      | uc003jmn.1                                                        | 205  | 233 | Inf |
| NUP155     | uc010iuz.1,uc003jku.1,uc003jkt.1                                  | 507  | 55  | Inf |
| LMBRD2     | uc003jkb.1                                                        | 95   | 135 | Inf |
| MTMR12     | uc010iul.1,uc010iuk.1,uc003jhg.1                                  | 511  | 235 | Inf |
| CDH12      | uc003jqk.1                                                        | 1715 | 26  | Inf |
| CDH18      | uc003jgd.1                                                        | 777  | 44  | Inf |
| FAM134B    | uc003jfs.1                                                        | 794  | 187 | Inf |
| FAM173B    | uc003jeo.2                                                        | 151  | 95  | Inf |
| FLJ33360   | uc003jdn.1                                                        | 157  | 25  | Inf |
| TPPP       | uc003jibh.2                                                       | 1242 | 141 | Inf |
| CCDC127    | uc003jam.1                                                        | 140  | 121 | Inf |
| RMND5B     | uc003miq.1                                                        | 119  | 43  | Inf |
| PRR7       | uc003mqw.1                                                        | 671  | 47  | Inf |
| FAF2       | uc003mej.2                                                        | 429  | 103 | Inf |
| C5orf25    | uc003mdt.2,uc003mde.2,uc010jka.1                                  | 335  | 26  | Inf |
| HMP19      | uc003mcx.1                                                        | 548  | 32  | Inf |
| BNIP1      | uc003mcl.2,uc003mck.2,uc003mcj.2,uc003mci.2                       | 193  | 93  | Inf |
| C5orf41    | uc003mcq.2,uc003mcf.2,uc003mch.1                                  | 289  | 265 | Inf |
| ATP6V0E1   | uc003mcd.1                                                        | 418  | 117 | Inf |
| ERGIC1     | uc003mbw.2                                                        | 2172 | 159 | Inf |
| GABRP      | uc003mau.1                                                        | 167  | 25  | Inf |
| KCNIP1     | uc003map.1                                                        | 3485 | 47  | Inf |
| RARS       | uc003lzx.1                                                        | 137  | 78  | Inf |
| HMMR       | uc003lzh.1,uc003lzh.1,uc003lzf.1                                  | 113  | 58  | Inf |
| GABRG2     | uc003lyz.2,uc003lyv.2,uc010jic.1                                  | 122  | 26  | Inf |
| FABP6      | uc003lya.1                                                        | 83   | 27  | Inf |
| CNOT8      | uc003lvi.1                                                        | 109  | 190 | Inf |
| GRIA1      | uc003luz.2,uc003lva.2,uc003luy.2                                  | 955  | 25  | Inf |
| GM2A       | uc003ltr.2                                                        | 135  | 111 | Inf |
| SLC6A7     | uc003lrr.1                                                        | 414  | 143 | Inf |
| SLC26A2    | uc003lri.1                                                        | 85   | 218 | Inf |
| FLJ41603   | uc003lra.1                                                        | 421  | 123 | Inf |
| AFAP1L1    | uc003laa.2,uc010iav.1,uc003lah.1                                  | 400  | 247 | Inf |
| FBXO38     | uc003lph.2,uc003lpg.1,uc003lpf.1                                  | 149  | 50  | Inf |
| STK32A     | uc003lom.2,uc003lol.2,uc010iqn.1                                  | 370  | 95  | Inf |
| SH3RF2     | uc003lnt.1                                                        | 500  | 92  | Inf |
| KCTD16     | uc003lnm.1                                                        | 667  | 60  | Inf |
| PCDHGB2    | uc003lis.1                                                        | 3625 | 114 | Inf |
| PCDHGC3    | uc003lkw.1,uc003lkv.1                                             | 954  | 179 | Inf |
| PAIP2      | uc003led.1                                                        | 204  | 154 | Inf |
| FAM53C     | uc003lcx.1,uc003lcw.1,uc003lcw.1                                  | 147  | 111 | Inf |
| STSG4523   | uc010iev.1                                                        | 147  | 111 | Inf |
| SEC24A     | uc003kzs.1                                                        | 641  | 160 | Inf |

|             |                                                                                         |      |     |     |
|-------------|-----------------------------------------------------------------------------------------|------|-----|-----|
| UBE2B       | uc003kzh.1                                                                              | 80   | 169 | Inf |
| TCF7        | uc003kzb.1,uc003kvt.1                                                                   | 85   | 49  | Inf |
| CD42SE2     | uc003kvh.2,uc003kvi.1                                                                   | 546  | 249 | Inf |
| CSNK1G3     | uc003kto.1,uc003ktn.1,uc003ktm.1,uc003ktl.1                                             | 163  | 244 | Inf |
| SNX24       | uc010jcy.1,uc003ktf.1,uc003ktg.1                                                        | 558  | 172 | Inf |
| SNCAIP      | uc010jct.1,uc003ksz.1,uc003ksy.1,uc003ksx.1,uc003ksw.1                                  | 287  | 252 | Inf |
| SRFBP1      | uc003kst.1                                                                              | 112  | 48  | Inf |
| DCP2        | uc003kah.1                                                                              | 137  | 127 | Inf |
| ZRSR1       | uc003kad.2,uc010jcb.1                                                                   | 151  | 74  | Inf |
| APC         | uc010jbz.1,uc003kpy.2,uc003kpz.2                                                        | 325  | 54  | Inf |
| FER         | uc003koq.1,uc003kop.1                                                                   | 289  | 205 | Inf |
| HISPPD1     | uc010jbo.1,uc003kod.2                                                                   | 117  | 53  | Inf |
| CAST        | uc003kit.1,uc003kly.1,uc003klx.1,uc003klw.1,uc003klv.1,uc003klu.1                       | 453  | 283 | Inf |
| RHOBTB3     | uc003klm.1                                                                              | 225  | 280 | Inf |
| XRCC4       | uc003kia.1,uc003kie.1,uc003kic.1,uc003kid.1,uc003kib.1                                  | 449  | 53  | Inf |
| MSH3        | uc003kqz.1                                                                              | 636  | 160 | Inf |
| FAM151B     | uc003kqv.1                                                                              | 193  | 179 | Inf |
| ZFYVE16     | uc003kqp.2,uc003kqs.2,uc003kqq.2,uc003kqr.2                                             | 94   | 179 | Inf |
| THBS4       | uc003kqh.1                                                                              | 324  | 164 | Inf |
| CMYA5       | uc003kqc.1                                                                              | 371  | 104 | Inf |
| PAPD4       | uc003kfk.2,uc003kga.2,uc010jaf.1,uc003kqb.2,uc010jae.1                                  | 234  | 42  | Inf |
| JMY         | uc003kfv.1                                                                              | 358  | 114 | Inf |
| HMGCR       | uc003kdq.1,uc003kdp.1                                                                   | 88   | 163 | Inf |
| TNPO1       | uc003kck.2                                                                              | 459  | 187 | Inf |
| PTCD2       | uc003kcc.1,uc003kcb.1                                                                   | 123  | 73  | Inf |
| MAP1B       | uc010ivy.1                                                                              | 167  | 49  | Inf |
| CENPH       | uc010ixc.1,uc003jvp.1                                                                   | 116  | 78  | Inf |
| SLC30A5     | uc003jvh.1                                                                              | 142  | 150 | Inf |
| KIAA0303    | uc003jiv.1                                                                              | 311  | 50  | Inf |
| SFRS12      | uc010iwy.1,uc003iun.1,uc003juo.1                                                        | 105  | 201 | Inf |
| C5orf44     | uc010iww.1,uc003iuc.2,uc003iua.2,uc003itz.2                                             | 140  | 62  | Inf |
| SDCCAG10    | uc003jtm.2,uc010iwt.1,uc003jtn.1                                                        | 98   | 56  | Inf |
| RGS7BP      | uc003jti.1                                                                              | 198  | 146 | Inf |
| IPO11       | uc003jit.1                                                                              | 781  | 127 | Inf |
| NDUFAF2     | uc003jisp.2                                                                             | 294  | 98  | Inf |
| GPBP1       | uc003jiri.2,uc003jirh.2,uc010iwa.1                                                      | 479  | 178 | Inf |
| NDUFS4      | uc003jipe.2                                                                             | 241  | 33  | Inf |
| PELO        | uc003jos.1                                                                              | 117  | 81  | Inf |
| ITGA1       | uc003jou.1                                                                              | 394  | 81  | Inf |
| NNT         | uc003joe.1,uc003jof.1                                                                   | 248  | 141 | Inf |
| MGC42105    | uc003jino.1                                                                             | 380  | 177 | Inf |
| GHR         | uc003jimt.1                                                                             | 498  | 206 | Inf |
| DKFZp547K2  | uc010iva.1                                                                              | 858  | 38  | Inf |
| WDR70       | uc003jiv.1                                                                              | 975  | 38  | Inf |
| DNAJC21     | uc003jic.1,uc003jib.1                                                                   | 105  | 211 | Inf |
| KIAA1334    | uc010ius.1                                                                              | 538  | 28  | Inf |
| RAI14       | uc010iur.1,uc003jir.1                                                                   | 742  | 277 | Inf |
| TARS        | uc003jhz.1,uc010iup.1,uc003jhy.1                                                        | 84   | 103 | Inf |
| PDZD2       | uc003jhm.1                                                                              | 2714 | 36  | Inf |
| CDH6        | uc003jhd.1,uc003jhe.1                                                                   | 321  | 136 | Inf |
| GUSBP1      | uc010iub.1                                                                              | 99   | 25  | Inf |
| FBXL7       | uc003jfn.1                                                                              | 1405 | 219 | Inf |
| NDUFS6      | uc003jcy.1                                                                              | 292  | 110 | Inf |
| KIAA1234    | uc010isy.1                                                                              | 3954 | 25  | Inf |
| AHRH        | uc003jaw.1,uc003jav.1                                                                   | 3954 | 25  | Inf |
| PDLIM3      | uc003ixv.2,uc003ixx.2,uc003ixw.2                                                        | 133  | 186 | Inf |
| ACSL1       | uc003iwt.1                                                                              | 565  | 29  | Inf |
| MLF1IP      | uc003iwr.1,uc003iwq.1                                                                   | 152  | 179 | Inf |
| CASP3       | uc003iwg.1                                                                              | 116  | 135 | Inf |
| ENPP6       | uc003iwc.1                                                                              | 1542 | 27  | Inf |
| GPM6A       | uc003iuh.1,uc003iug.1                                                                   | 977  | 150 | Inf |
| GLRA3       | uc003itz.1,uc003ity.1                                                                   | 361  | 54  | Inf |
| FBXO8       | uc003itq.1,uc003itp.1                                                                   | 84   | 68  | Inf |
| C4orf27     | uc003isl.2                                                                              | 96   | 116 | Inf |
| SPOCK3      | uc003irk.2,uc003iri.1,uc003iri.1                                                        | 907  | 122 | Inf |
| FSTL5       | uc010iqv.1,uc003iqh.1,uc003iqi.1                                                        | 1572 | 33  | Inf |
| C4orf18     | uc003ipp.2                                                                              | 82   | 83  | Inf |
| PDGFC       | uc003ipi.1,uc003iph.1                                                                   | 457  | 196 | Inf |
| PET112L     | uc003imm.2,uc003iml.1                                                                   | 323  | 36  | Inf |
| SH3D19      | uc003imc.2                                                                              | 318  | 29  | Inf |
| LRBA        | uc003ilu.2                                                                              | 2468 | 104 | Inf |
| DKFZp761C0  | uc003ild.1                                                                              | 161  | 138 | Inf |
| LOC90826    | uc003ilc.1                                                                              | 161  | 138 | Inf |
| OTUD4       | uc003ikb.2,uc003ijz.2,uc003ika.2                                                        | 116  | 76  | Inf |
| ANAPC10     | uc003ijv.2,uc003iju.2,uc003ijw.2                                                        | 233  | 96  | Inf |
| AK095554    | uc003iic.1                                                                              | 390  | 97  | Inf |
| SCLT1       | uc003iat.2,uc003iar.2,uc010iob.1,uc003iaq.2,uc003iap.2                                  | 86   | 138 | Inf |
| BBS7        | uc003iee.1,uc003ied.1                                                                   | 122  | 91  | Inf |
| PDE5A       | uc003idg.1,uc003idf.1                                                                   | 185  | 217 | Inf |
| PRSS12      | uc003ica.1                                                                              | 206  | 289 | Inf |
| PITX2       | uc003iaf.1                                                                              | 1181 | 31  | Inf |
| AGXT2L1     | uc010imc.1,uc003hzc.1                                                                   | 91   | 134 | Inf |
| PAPSS1      | uc003hyk.1                                                                              | 226  | 232 | Inf |
| TBCKL       | uc003hve.1,uc010iiv.1,uc003hyf.1,uc003hyc.1                                             | 472  | 78  | Inf |
| TBCK        | uc003hvd.1                                                                              | 472  | 78  | Inf |
| CENPE       | uc003hxc.1,uc003hxb.1                                                                   | 135  | 82  | Inf |
| NHEDC1      | uc010ilm.1,uc003hww.1,uc003hww.1                                                        | 242  | 71  | Inf |
| UBE2D3      | uc003hwl.1,uc003hww.1,uc003hwi.1                                                        | 83   | 206 | Inf |
| MANBA       | uc003hwg.1                                                                              | 398  | 141 | Inf |
| PPP3CA      | uc010ilk.1,uc010ilj.1,uc003hvu.1,uc003hvs.1,uc003hvv.1                                  | 528  | 236 | Inf |
| DKFZp761L05 | uc003hvt.1                                                                              | 528  | 236 | Inf |
| SNCA        | uc003hsq.1,uc003hsr.1,uc003hsp.1                                                        | 247  | 170 | Inf |
| HEL308      | uc010ikb.1,uc003hom.1                                                                   | 234  | 61  | Inf |
| HPSE        | uc010ika.1,uc003hoj.2,uc003hok.2                                                        | 182  | 125 | Inf |
| KIAA2037    | uc010iju.1,uc003hny.2                                                                   | 398  | 78  | Inf |
| LIN54       | uc010ijt.1,uc003hnz.2,uc003hnx.2                                                        | 398  | 78  | Inf |
| SEC31A      | uc003hno.2,uc003hnn.1,uc003hnl.1,uc003hnk.1,uc003hni.1,uc003hnh.1,uc003hng.1,uc003hnf.1 | 166  | 167 | Inf |
| SCARB2      | uc003hju.1                                                                              | 207  | 234 | Inf |

|            |                                                        |      |     |     |
|------------|--------------------------------------------------------|------|-----|-----|
| NUP54      | uc003hit.1,uc010ije.1,uc003hjs.1                       | 84   | 132 | Inf |
| SDAD1      | uc003hjf.2,uc003hie.2                                  | 110  | 54  | Inf |
| PPEF-2     | uc003hiz.1                                             | 233  | 25  | Inf |
| G3BP2      | uc003hit.1,uc003his.1,uc003hir.1                       | 124  | 211 | Inf |
| CDKL2      | uc003hiq.1                                             | 230  | 102 | Inf |
| BTC        | uc003hiq.2                                             | 107  | 110 | Inf |
| RASSF6     | uc010iil.1,uc010iik.1,uc003hhd.1,uc003hhc.1            | 93   | 40  | Inf |
| ANKRD17    | uc003har.1,uc003haq.1,uc003hap.1                       | 562  | 192 | Inf |
| ADAMTS3    | uc003hgk.1                                             | 394  | 95  | Inf |
| CENPC1     | uc010ihm.1,uc003hdd.1                                  | 124  | 81  | Inf |
| EPHA5      | uc003hda.1,uc003hcx.1,uc003hcz.1,uc003hcy.1            | 414  | 128 | Inf |
| PPAT       | uc003hbr.1                                             | 127  | 177 | Inf |
| CLOCK      | uc003haz.1                                             | 327  | 143 | Inf |
| SCFD2      | uc010iam.1,uc003qzu.1                                  | 1317 | 60  | Inf |
| TEC        | uc003qzx.1                                             | 439  | 197 | Inf |
| CRN        | uc003qxn.2                                             | 461  | 144 | Inf |
| CORIN      | uc003qxm.1                                             | 692  | 144 | Inf |
| GABRA2     | uc003qxc.2                                             | 144  | 34  | Inf |
| PHOX2B     | uc003qwf.2                                             | 211  | 102 | Inf |
| RBM47      | uc003qvc.2                                             | 1588 | 96  | Inf |
| C4orf34    | uc003quo.1                                             | 409  | 114 | Inf |
| RFC1       | uc003qtz.1,uc003qtv.1,uc003qtx.1                       | 160  | 89  | Inf |
| KIAA0746   | uc003qru.2                                             | 718  | 259 | Inf |
| PPARGC1A   | uc003qqs.1                                             | 241  | 25  | Inf |
| KCNIP4     | uc003qae.1                                             | 465  | 38  | Inf |
| LCORL      | uc003ppq.1                                             | 343  | 322 | Inf |
| FBXL5      | uc010idy.1,uc003god.1,uc010idx.1,uc003goc.1,uc003gob.1 | 101  | 240 | Inf |
| BC035722   | uc003gmw.1                                             | 172  | 37  | Inf |
| RAB28      | uc003gmu.1,uc003gmt.1                                  | 260  | 166 | Inf |
| ACO3       | uc003gld.2,uc003glc.2                                  | 2045 | 99  | Inf |
| AFAP1      | uc003qkf.1                                             | 1778 | 27  | Inf |
| JAKMIP1    | uc003giu.2                                             | 1725 | 35  | Inf |
| STX18      | uc003qic.1                                             | 590  | 118 | Inf |
| WHSC2      | uc003gen.1,uc003gem.1                                  | 842  | 248 | Inf |
| FAM53A     | uc010ibw.1,uc003gdh.1                                  | 1454 | 244 | Inf |
| FLJ14297   | uc010ibd.1,uc003gae.2,uc003gad.2,uc003qac.2            | 207  | 55  | Inf |
| ZNF721     | uc003qaf.2                                             | 146  | 55  | Inf |
| NEIL3      | uc010irs.1,uc003iut.2                                  | 159  | 104 | Inf |
| CLCN3      | uc003isi.1,uc003ish.1                                  | 357  | 113 | Inf |
| PALLD      | uc003irv.1                                             | 1937 | 113 | Inf |
| ETFHD      | uc010iar.1,uc003iqb.1                                  | 115  | 142 | Inf |
| TMEM144    | uc003ipx.1                                             | 112  | 36  | Inf |
| TRIM2      | uc003inq.1                                             | 1322 | 180 | Inf |
| ARFIP1     | uc003inc.1,uc003inb.1,uc003ina.1,uc003imz.1            | 394  | 106 | Inf |
| IL15       | uc003iit.1,uc003iis.1                                  | 214  | 157 | Inf |
| MGST2      | uc003ihy.1                                             | 128  | 32  | Inf |
| INTU       | uc003ifk.1                                             | 107  | 32  | Inf |
| SPATA5     | uc003iev.2,uc003iez.2                                  | 333  | 85  | Inf |
| FGF2       | uc003iev.1                                             | 158  | 296 | Inf |
| KIAA1627   | uc003icg.1,uc003icf.1                                  | 96   | 59  | Inf |
| NDST3      | uc003ibx.1                                             | 325  | 26  | Inf |
| C4orf16    | uc010imm.1,uc003iak.2,uc003iaj.2                       | 78   | 182 | Inf |
| SCYE1      | uc003hyq.1,uc003hyh.1                                  | 75   | 75  | Inf |
| GSTCD      | uc003hxx.2,uc010ils.1,uc003hxy.2                       | 180  | 90  | Inf |
| CISD2      | uc003hwt.2                                             | 95   | 132 | Inf |
| KIAA1122   | uc010ila.1                                             | 219  | 60  | Inf |
| SMARCAD1   | uc003htb.2,uc003htc.2,uc003htd.2                       | 219  | 89  | Inf |
| ARHGAP24   | uc003hpi.1,uc003hpi.2,uc003hpk.1                       | 459  | 81  | Inf |
| COPS4      | uc010ijx.1,uc010ijw.1,uc003hob.1,uc003hoa.1            | 169  | 55  | Inf |
| C4orf22    | uc010ijp.1,uc003hmf.1                                  | 986  | 75  | Inf |
| ANXA3      | uc010ijk.1,uc003hle.1,uc003hld.1                       | 134  | 137 | Inf |
| MRPL1      | uc003hku.2                                             | 292  | 36  | Inf |
| AK310457   | uc010ijf.1                                             | 89   | 122 | Inf |
| CR627383   | uc003hvw.1                                             | 89   | 122 | Inf |
| FAM47D     | uc003hiv.1,uc003hix.1,uc003hiv.1                       | 315  | 203 | Inf |
| MOBK1A     | uc003hfv.1,uc003hfw.1                                  | 394  | 168 | Inf |
| ARL9       | uc003hby.1                                             | 84   | 128 | Inf |
| KIAA1211   | uc010iha.1                                             | 595  | 28  | Inf |
| FIP1L1     | uc003qzx.2,uc003hab.1,uc003qzz.1,uc003qzy.1            | 92   | 167 | Inf |
| PDGFRA     | uc003haa.1                                             | 4610 | 167 | Inf |
| SPATA18    | uc003qzk.1,uc003qzl.1                                  | 124  | 165 | Inf |
| SLAIN2     | uc003qya.2                                             | 186  | 238 | Inf |
| GABRB1     | uc003qxh.1                                             | 725  | 101 | Inf |
| LIMCH1     | uc003qwd.2,uc003qwc.2                                  | 365  | 26  | Inf |
| PGM2       | uc003qta.1                                             | 125  | 182 | Inf |
| TBC1D19    | uc010iew.1,uc003qsf.2                                  | 292  | 49  | Inf |
| ZCCHC4     | uc003qar.2                                             | 203  | 66  | Inf |
| CD38       | uc003qoj.1,uc003qol.1                                  | 194  | 130 | Inf |
| C4orf23    | uc003qgf.1                                             | 458  | 49  | Inf |
| KIAA0232   | uc003qiq.2,uc003qir.2                                  | 587  | 346 | Inf |
| DKFZp762M1 | uc010ida.1                                             | 2091 | 240 | Inf |
| STK32B     | uc003qih.1                                             | 2091 | 240 | Inf |
| AK056081   | uc003qie.1                                             | 221  | 50  | Inf |
| RGS12      | uc010icu.1,uc010icv.1,uc003qha.1                       | 1366 | 73  | Inf |
| C4orf8     | uc010ick.1                                             | 922  | 27  | Inf |
| ZNF141     | uc003fzz.2,uc003gab.2,uc003qaa.2                       | 100  | 127 | Inf |
| IQCG       | uc003fyq.2,uc003fyn.1,uc003fyo.1                       | 361  | 55  | Inf |
| RNF168     | uc010iah.1,uc003fwa.1                                  | 265  | 181 | Inf |
| PCYT1A     | uc003fwh.1,uc003fwg.1                                  | 527  | 177 | Inf |
| MUC4       | uc010hzu.1                                             | 597  | 29  | Inf |
| FGF12      | uc003fsx.1                                             | 564  | 104 | Inf |
| BCL6       | uc003frp.2,uc010hza.1                                  | 189  | 35  | Inf |
| EHHADH     | uc003fof.1                                             | 235  | 73  | Inf |
| ABCC5      | uc010hxo.1,uc010hxn.1,uc003fmi.1,uc003fmq.1            | 283  | 192 | Inf |
| PARL       | uc003fme.1,uc003fmd.1                                  | 388  | 94  | Inf |
| MCC-B      | uc003ff.1                                              | 459  | 139 | Inf |
| MCCC1      | uc003fle.1                                             | 459  | 139 | Inf |
| ZMAT3      | uc003fji.1,uc010hxa.1,uc003fiq.1                       | 195  | 205 | Inf |

|            |                                                                                         |      |     |     |
|------------|-----------------------------------------------------------------------------------------|------|-----|-----|
| AADACL1    |                                                                                         |      |     |     |
| EV11       | uc003fig.1                                                                              | 429  | 80  | Inf |
| PDCD10     | uc003ffk.2,uc003ffn.2,uc003ffj.2,uc010hwm.1,uc003ffi.2,uc010hwl.1                       | 109  | 95  | Inf |
| ZBBX       | uc003fez.1,uc003fex.1,uc003fey.1                                                        | 97   | 103 | Inf |
| KPNA4      | uc003feq.1,uc003fep.1                                                                   | 235  | 60  | Inf |
| TRIM59     | uc003fdn.1                                                                              | 213  | 358 | Inf |
| SHOX2      | uc003fdm.1                                                                              | 81   | 170 | Inf |
| DHX36      | uc010hvw.1,uc003fbs.1,uc003fbr.1                                                        | 261  | 189 | Inf |
| WWTR1      | uc003ezz.2,uc003ezy.2,uc010hva.1                                                        | 118  | 46  | Inf |
| HLTF       | uc003exe.1,uc003exf.1                                                                   | 666  | 165 | Inf |
| PLSCR4     | uc003ews.1,uc010hve.1,uc003ewr.1,uc003ewq.1                                             | 198  | 124 | Inf |
| PLOD2      | uc003evu.2,uc010hva.1,uc010huy.1,uc003evt.2,uc010huz.1                                  | 96   | 147 | Inf |
| AMOTL2     | uc003evs.1,uc003evr.1                                                                   | 154  | 223 | Inf |
| TOPBP1     | uc003eqh.1,uc003eqq.1                                                                   | 452  | 230 | Inf |
| ACAD11     | uc003eps.1                                                                              | 163  | 113 | Inf |
| CPNE4      | uc003eoy.2,uc003eov.2                                                                   | 94   | 114 | Inf |
| PLXND1     | uc003eok.1                                                                              | 819  | 114 | Inf |
| C3orf25    | uc003emx.2                                                                              | 1971 | 550 | Inf |
| KIAA1160   | uc003emq.1                                                                              | 324  | 83  | Inf |
| RAB43      | uc010hsy.1                                                                              | 300  | 250 | Inf |
| KIAA1257   | uc003eln.1                                                                              | 300  | 250 | Inf |
| RPN1       | uc003elq.1,uc003eli.2                                                                   | 653  | 135 | Inf |
| ZNF148     | uc003ekr.1                                                                              | 259  | 196 | Inf |
| SLC12A8    | uc003ehy.2,uc003eia.2,uc010hsa.1,uc003ehz.2,uc003ehx.2                                  | 521  | 157 | Inf |
| POLQ       | uc010hrz.1,uc003ehv.2                                                                   | 1002 | 154 | Inf |
| FSTL1      | uc003eee.2                                                                              | 380  | 62  | Inf |
| GSK3B      | uc010hrb.1,uc003eds.1                                                                   | 151  | 252 | Inf |
| LSAMP      | uc003edo.1,uc003edn.1                                                                   | 753  | 53  | Inf |
| ZBTB20     | uc003ebt.1                                                                              | 1207 | 59  | Inf |
| KIAA1407   | uc003ebn.1                                                                              | 1722 | 121 | Inf |
| CCDC52     | uc003eax.1                                                                              | 211  | 76  | Inf |
| CBLB       | uc003eaq.2                                                                              | 185  | 72  | Inf |
| ZBTB11     | uc003dwe.1,uc003dwd.1,uc003dwc.1                                                        | 369  | 165 | Inf |
| PROS1      | uc003dve.2                                                                              | 136  | 205 | Inf |
| FAM86D     | uc003drb.2                                                                              | 258  | 122 | Inf |
| PDZRN3     | uc003dpq.2,uc003dpp.2                                                                   | 91   | 45  | Inf |
| FRMD4B     | uc003dbl.1                                                                              | 1247 | 388 | Inf |
| MAG11      | uc003dny.2,uc003dnt.2                                                                   | 320  | 117 | Inf |
| THOC7      | uc003dmr.2,uc003dmp.1,uc003dmo.1,uc003dmn.1,uc003dmm.1                                  | 2118 | 222 | Inf |
| FHIT       | uc003dlu.2,uc003dlt.2                                                                   | 85   | 250 | Inf |
| DNASE1L3   | uc010hnn.1,uc003dky.2,uc003dkx.2                                                        | 3032 | 100 | Inf |
| FAM116A    | uc003djo.1                                                                              | 130  | 29  | Inf |
| DNAH12     | uc003dia.1                                                                              | 232  | 160 | Inf |
| IL17RD     | uc003diu.1                                                                              | 201  | 30  | Inf |
| ARHGEF3    | uc003dik.1                                                                              | 373  | 25  | Inf |
| WNT5A      | uc003dif.2,uc003dih.2                                                                   | 234  | 27  | Inf |
| NEK4       | uc003dhn.1,uc010hmv.1                                                                   | 208  | 35  | Inf |
| TLR9       | uc003dfr.2,uc003dfq.2                                                                   | 144  | 101 | Inf |
| TWF2       | uc010hmc.1                                                                              | 282  | 194 | Inf |
| WDR51A     | uc003ddd.1                                                                              | 282  | 194 | Inf |
| DKFZp434C2 | uc003dcw.1,uc003dcu.1                                                                   | 878  | 113 | Inf |
| PCBP4      | uc003dcv.1                                                                              | 878  | 113 | Inf |
| RRP9       | uc003dcl.1                                                                              | 92   | 75  | Inf |
| RASSF1     | uc003dbw.1                                                                              | 159  | 106 | Inf |
| HYAL3      | uc003dab.1,uc003dac.2                                                                   | 81   | 238 | Inf |
| DKFZp564E0 | uc003czq.1,uc003czf.1,uc003cze.1,uc003czd.1                                             | 119  | 114 | Inf |
| CAMKV      | uc003cxc.1,uc003cxw.1                                                                   | 123  | 138 | Inf |
| IHPK1      | uc003cxv.1,uc003cxu.1,uc003cxt.1                                                        | 123  | 138 | Inf |
| IP6K1      | uc003cxo.1                                                                              | 444  | 142 | Inf |
| RHOA       | uc003cxn.1,uc003cxm.1                                                                   | 500  | 142 | Inf |
| USP4       | uc010hku.1                                                                              | 439  | 236 | Inf |
| SLC25A20   | uc003cwp.1                                                                              | 225  | 25  | Inf |
| COL7A1     | uc010hkj.1,uc003cva.2                                                                   | 263  | 72  | Inf |
| SHISA5     | uc003ctz.2                                                                              | 900  | 159 | Inf |
| DKFZp547H1 | uc003cto.1,uc003ctq.1,uc003ctp.1                                                        | 338  | 123 | Inf |
| MAP4       | uc003crv.1                                                                              | 297  | 25  | Inf |
| KIF9       | uc003csf.2,uc003csc.2,uc003csq.1,uc003csb.1                                             | 839  | 171 | Inf |
| LTF        | uc010hip.1,uc003caz.1,uc003caq.1,uc003cax.1                                             | 347  | 165 | Inf |
| FYCO1      | uc010hjh.1,uc003cpq.1                                                                   | 104  | 103 | Inf |
| ZDHHC3     | uc003cpb.2                                                                              | 502  | 108 | Inf |
| ZNF445     | uc003coq.1,uc003cof.1                                                                   | 352  | 158 | Inf |
| SEC22C     | uc003cnf.2                                                                              | 193  | 106 | Inf |
| ULK4       | uc003cli.1                                                                              | 364  | 141 | Inf |
| GLB1       | uc003ckx.1,uc003ckw.2,uc003ckv.2                                                        | 395  | 113 | Inf |
| FLJ45032   | uc003cfi.1,uc003cfj.1,uc003cfh.1                                                        | 625  | 163 | Inf |
| SBC2       | uc003cfk.1                                                                              | 84   | 159 | Inf |
| SLC4A7     | uc010hfm.1                                                                              | 330  | 304 | Inf |
| NGLY1      | uc003cdu.2                                                                              | 419  | 304 | Inf |
| THRB       | uc003cdm.1,uc010hfg.1,uc003cdl.1                                                        | 136  | 129 | Inf |
| NKIRAS1    | uc003cdd.2,uc003cde.1,uc003cdc.2,uc003ccd.2,uc003ccz.2,uc003ccy.2,uc003ccx.2,uc010hfe.1 | 587  | 204 | Inf |
| ZNF385D    | uc003ccm.1,uc003ccd.1,uc003cck.1,uc003ccj.1                                             | 105  | 173 | Inf |
| TBC1D5     | uc003cce.1                                                                              | 520  | 53  | Inf |
| SH3BP5     | uc003cbf.1                                                                              | 1197 | 29  | Inf |
| RAF1       | uc003bzb.1                                                                              | 585  | 217 | Inf |
| C3orf31    | uc003bxf.2                                                                              | 363  | 150 | Inf |
| SEC13      | uc003bjw.1,uc003bwh.1                                                                   | 238  | 74  | Inf |
| PRRT3      | uc003bvm.1,uc003bvp.1,uc003bvo.1,uc003bvn.1                                             | 166  | 73  | Inf |
| KIAA0411   | uc003bul.2                                                                              | 399  | 89  | Inf |
| SRGAP3     | uc003brk.2                                                                              | 1342 | 48  | Inf |
| RAD18      | uc003brq.1,uc003brf.1                                                                   | 2039 | 48  | Inf |
| SUMF1      | uc003brd.1                                                                              | 154  | 56  | Inf |
| LMLN       | uc010hby.1,uc003bpz.1                                                                   | 315  | 84  | Inf |
| OPA1       | uc010ias.1,uc003fyu.1,uc003fyt.1,uc010iar.1,uc003fyv.1                                  | 468  | 151 | Inf |
| IL1RAP     | uc003ftn.1,uc003ftm.1,uc003ftl.1,uc003ftk.1,uc003ftj.1,uc003fti.1,uc003fth.1,uc003ftq.1 | 319  | 112 | Inf |
| LPP        | uc010hzh.1,uc003fsl.1,uc003fso.1,uc010hza.1,uc003fsq.2,uc003fsk.1,uc003fsm.1            | 375  | 198 | Inf |
| MAP3K13    | uc003frs.1                                                                              | 1974 | 25  | Inf |
| VPS8       | uc010hyf.1                                                                              | 895  | 86  | Inf |
| FAM131A    | uc010hyd.1,uc003fpb.1                                                                   | 781  | 96  | Inf |
|            | uc003foq.1                                                                              | 125  | 51  | Inf |



|          |                                             |      |     |     |
|----------|---------------------------------------------|------|-----|-----|
| PSMD2    | uc003fnn.1                                  | 97   | 165 | Inf |
| ECE2     | uc003fni.2                                  | 1132 | 107 | Inf |
| FXR1     | uc003fkr.1,uc003fkq.1,uc003fkp.1            | 370  | 100 | Inf |
| NDUFB5   | uc003fke.1,uc003fkc.1                       | 97   | 80  | Inf |
| NLGN1    | uc010hww.1,uc003fip.1                       | 1309 | 52  | Inf |
| FNDC3B   | uc003fhz.2,uc010hwt.1                       | 1593 | 241 | Inf |
| SERPINI1 | uc003ffb.2,uc003ffa.2                       | 178  | 53  | Inf |
| SCHIP1   | uc010hvz.1                                  | 535  | 298 | Inf |
| GFM1     | uc003fcd.2,uc003fce.1                       | 112  | 66  | Inf |
| RSRC1    | uc003fbu.1,uc003fbv.1,uc003fvt.1            | 652  | 111 | Inf |
| KCNAB1   | uc010hvt.1,uc003fat.2,uc003far.2            | 728  | 126 | Inf |
| MME      | uc003fad.1,uc003fac.1,uc003fab.1,uc003fae.1 | 206  | 132 | Inf |
| MED12L   | uc003eyo.2,uc003eyn.2,uc003eyp.1,uc003eym.1 | 428  | 232 | Inf |
| SELT     | uc003evf.1                                  | 189  | 143 | Inf |
| FAM62C   | uc003esk.1                                  | 435  | 283 | Inf |
| ARMC8    | uc003esb.1                                  | 376  | 30  | Inf |
| BFSP2    | uc003epn.1                                  | 535  | 52  | Inf |
| DNAJC13  | uc010htq.1,uc003eor.1                       | 131  | 129 | Inf |
| NEK11    | uc003enw.1,uc003eoa.1,uc003enx.1,uc003eny.1 | 201  | 84  | Inf |
| nek11L   | uc003enz.1                                  | 544  | 84  | Inf |
| C3orf37  | uc003elu.1,uc003elw.1,uc003elv.1,uc003elt.1 | 137  | 234 | Inf |
| ACAD9    | uc010hsw.1,uc003elb.1,uc003ela.2            | 372  | 134 | Inf |
| RAB7     | uc010hsv.1                                  | 622  | 170 | Inf |

**Table S4.3**

**List of candidate genes whose expression was up-regulated in the Saqqaq hairs.**

This list corresponds to the top 1,000 non-redundant genes showing the highest  $R_s$  values (transcripts are collapsed into a single Gene name, providing the maximal  $R_s$  value observed in this quartile).  $R_s$  values and respective coverage in PM and RE regions are provided.

## Section SI5. References.

- R.S. Alisch, B.G. Barwick, P. Chopra, L.K. Myrick, G.A. Satten, K.N. Conneely, S.T. Warren. Age-associated DNA methylation in pediatric populations. *Genome Res.* **22**, 623-632 (2012).
- P.J. Aruscavage, S. Hellwig, B.L. Bass. Small DNA pieces in *C. elegans* are intermediates of DNA fragmentation during apoptosis. *PLoS One* **5**, e11217 (2010).
- M.P. Ball *et al.* Targeted and genome-scale strategies reveal gene-body methylation signatures in human cells. *Nat. Biotechnol.* **27**, 485 (2009).
- H. Bazzi, S. Demehri, C.S. Potter, A.G. Barber, A. Awgulewitsch, R. Kopan, A.M. Christiano. Desmoglein 4 is regulated by transcription factors implicated in hair shaft differentiation. *Differentiation* **78**, 292-300 (2009).
- A.C. Bell, G. Felsenfeld. Methylation of a CTCF-dependent boundary controls imprinted expression of the *Igf2* gene. *Nature* **405**, 482-485 (2000).
- A.C. Bell, A.G. West, G. Felsenfeld. Insulators and boundaries: versatile regulatory elements in the eukaryotic genome. *Science* **291**, 447-450 (2001).
- Y. Benjamini, T.P. Speed, TP. Summarizing and correcting the GC content bias in high-throughput sequencing. *Nucleic Acid Res* **40**, e72 (2012).
- T. Beissbarth, T.P. Speed. GOstat: Find statistically overrepresented Gene Ontologies within a group of genes *Bioinformatics* **20**, 1464-1465 (2004).
- N.V. Botchkavera, G. Ahluwalia, D. Shander. Apoptosis in the hair follicle. *J Invest Dermatol* **126**, 258-264 (2006).
- F. Brenet, M. Moh, P. Funk, E. Feierstein, A.J. Viale, N.D. Socci, S.M. Scandura. DNA methylation of the first exon is tightly linked to transcriptional silencing. *PLoS One* **6**, e14524 (2011).
- A.W. Briggs *et al.* Removal of deaminated cytosines and detection of in vivo methylation in ancient DNA. *Nucleic Acids Res* **38**, e87 (2010).
- A.W. Briggs *et al.* Patterns of damage in genomic DNA sequences from a Neandertal. *Proc. Natl. Acad. Sci.* **104**, 14616–14621 (2007).
- P. Brotherton *et al.* Novel high-resolution characterization of ancient DNA reveals C > U-type base modification events as the sole cause of post mortem miscoding lesions. *Nucleic Acids Res.* **35**, 5717–5728 (2007).
- C.K. Collings, A.G. Fernandez, C.G. Pitschka, T.B. Hawkins, J.N. Anderson. Oligonucleotide sequence motifs as nucleosome positioning signals. *PLoS One* **5**, e10933 (2010).
- A.M. Deaton, A. Bird. CpG islands and the regulation of transcription. *Genes Dev.* **25**, 1010-1022 (2011).
- S. Dedeurwaerder, M. Defrance, E. Calonne E, H. Denis, C. Sotiriou, F. Fuks. Evaluation of the Infinium Methylation 450K technology. *Epigenomics* **3**, 771–784 (2011).
- K. Day, L.L. Waite, A. Thalacker-Mercer, A. West, M.M. Bamman, J.D. Brooks, R.M. Myers, D. Absher. Differential DNA methylation with age displays both common and dynamic features across human tissues that are influenced by CpG landscape. *Genome Biol.* **14**, R102 (2013).

- J.H. Dennis *et al.* Independent and complementary methods for large-scale structural analysis of mammalian chromatin. *Genome Res.* **17**, 928-939 (2007).
- J.C. Dohm, C. Lottaz, T. Borodina, H. Himmelbauer. Substantial biases in ultra-short read data sets from high-throughput DNA sequencing. *Nucleic Acids Res.* **36**, e105 (2008).
- T.A. Down, et al. A Bayesian deconvolution strategy for immunoprecipitation-based DNA methylome analysis. *Nat. Biotechnol.* **26**, 779-785 (2008).
- F. Eckardt *et al.* DNA methylation profiling of human chromosomes 6, 20, 22. *Nat. Genet.* **38**, 1378-85.
- J. Ernst *et al.* Mapping and analysis of chromatin state dynamics in nine human cell types. *Nature* **473**, 43-9 (2011).
- M.J. Fogg, L.H. Pearl, B.A. Connolly. Structural basis for uracil recognition by archaeal family b DNA polymerases. *Nature Struct. Biol.* **9**, 922-927 (2002).
- Y. Fu, M. Sinha, C.L. Peterson, Z. Weng. The insulator binding protein CTCF positions 20 nucleosomes around its binding sites across the human genome. *PLoS Genet.* **4**, e1000138 (2008).
- P.A. Fujita *et al.* The UCSC Genome Browser database: update 2011. *Nucleic Acids Res.* **39**, D876-82 (2010).
- D.J. Gaffney *et al.* Controls of Nucleosome Positioning in the Human Genome. *PLoS Genetics* **8**, e1003036 (2012).
- M.T. Gilbert *et al.* Recharacterization of ancient DNA miscoding lesions: insights in the era of sequencing-by-synthesis. *Nucleic Acids Res.* **35**, 1-10 (2007).
- M.T. Gilbert *et al.* Paleo-Eskimo mtDNA genome reveals matrilineal discontinuity in Greenland. *Science* **320**, 1787-1789 (2008).
- P.A. Ginno, P.L. Lott, H.C. Christensen, I. Korf, F. Chedin. R-loop formation is a distinctive characteristic of unmethylated human CpG island promoters. *Molecular Cell* **45**, 1-12 (2012).
- A. Ginolhac, M. Rasmussen, M.T. Gilbert, E. Willerslev, L. Orlando. mapDamage: testing for damage patterns in ancient DNA sequences. *Bioinformatics* **27**, 2153-2155 (2011).
- H. Gong et al. An updated nomenclature for Keratin-Associated Proteins (KAPs). *Int. J. Biol. Sci.* **8**, 258-264 (2012).
- R.E. Green *et al.* A draft sequence of the Neandertal genome. *Science* **328**, 710-722 (2010).
- A. Johansson, S. Enroth, U. Gyllensten. Continuous aging of the human DNA methylome throughout the human lifespan. *PLoS One* **8**, e67378 (2013).
- T.K. Kelly, Y. Liu, F.D. Lay, G. Liang, B.P. Berman, P. Jones. Genome-wide mapping of nucleosome positioning and DNA methylation within individual DNA molecules. *Genome Res.* **22**, 2497-2506 (2012).
- S.J. Kim *et al.* Gallagher and John C. Rockett. Gene Expression in Head Hair Follicles Plucked from Men and Women. *Ann. Clin. Lab. Sci. Spring* **36**, 115-126 (2006).
- J.Y. Kim, S. Tavaré, D. Shibata. Human hair genealogies and stem cell latency. Human hair genealogies and stem cell latency. *BMC Biology* **4**, 2 (2006).
- T.H. Kim *et al.* Analysis of the vertebrate insulator protein CTCF-binding sites in the human genome. *Cell* **128**, 1231-1245 (2007).

C.M. Koch, W. Wagner. Epigenetic-aging-signature to determine age in different tissues. *AGING* **3**, 1018-27 (2011).

J. Krause *et al.* A complete mtDNA genome of an early modern human from Kostenki Russia. *Curr. Biol.* **20**, 231-236 (2010).

L. Langbein, H. Yoshida, S.Praetzel-Wunder, D.A. Parry, J. Schweizer. The keratins of the human beard hair medulla: the riddle in the middle. *J. Invest. Derm.* **130**, 55-73 (2010).

L. Laurent *et al.* in the human methylome during differentiation. *Genome Res.* **20**, 320-331 (2010).

Y.J. Lee, R.H. Rice, Y.M. Lee. Proteome analysis of human hair shaft. *Mol. Cell. Proteomics* **5**, 789-800 (2006).

H. Li, R. Durbin. Fast and accurate long-read alignment with Burrows-Wheeler transform. *Bioinformatics* **26**, 589-595 (2010).

H. Li *et al.* 1000 Genome Project Data Processing Subgroup. The Sequence Alignment/Map format and SAMtools. *Bioinformatics* **25**, 2078-2079 (2009).

S. Lindgreen. AdapterRemoval: easy cleaning of next-generation sequencing reads. *BMC Res. Notes* **5**, 337 (2012).

R. Lister, *et al.* Human DNA methylomes at base resolution show widespread epigenomic differences. *Nature* **464**, 315-322 (2009).

C.Y. McLean *et al.* GREAT improves functional interpretation of cis-regulatory regions. *Nat Biotechnol* **28**:495-501.

L.R. Meyer *et al.* The UCSC Genome Browser database: extensions and updates 2013. *Nucleic Acids Res.* **41**(Database issue), D64-D69 (2012).

W. Miller *et al.* Polar and brown bear genomes reveal ancient admixture and demographic footprints of past climate change. *Proc Natl Acad Sci U S A* **109**, E2382-E2390 (2012).

R. Moll, M. Divo, L. Langbein. The human keratins: biology and pathology. *Histochem. Cell. Biol.* **129**, 705-733 (2008).

S. Nagata, M. Enari, H. Sakahira, H. Yokoyama, K. Okawa, A. Iwamatsu. A caspase-activated DNase that degrades DNA during apoptosis, and its inhibitor ICAD. *Nature* **391**, 43-50 (1998).

A. Noer, A.L. Sorensen, A.C. Boquest, P. Collas. Stable CpG hypomethylation of adipogenic promoters in freshly isolated, cultured, and differentiated mesenchymal stem cells from adipose tissue. *Mol. Biol. Cell.* **17**, 3543-3556 (2006).

L. Orlando *et al.* Revising the recent evolutionary history of equids using ancient DNA. *Proc. Natl. Acad. Sci. USA* **106**, 21754-21759 (2009).

L. Orlando *et al.* True single-molecule DNA sequencing of a pleistocene horse bone. *Genome Res.* **21**, 1705-1719 (2011).

L. Orlando *et al.* Recalibrating *Equus* evolution using the genome sequence of an Early Middle Pleistocene horse. *Nature* **499**, 74-78 (2013).

F. Ozsolak, J.S. Song, X.S. Liu, D.E. Fisher. High-throughput mapping of the chromatin structure of human promoters. *Nat. Biotechnol.* **25**:244-248 (2007).

H. Pages, P. Aboyoun, M. Lawrence. IRanges: Infrastructures for manipulating intervals on sequences. R packages version 1.8.9.

R Development Core Team 2012. R: A language and environment for statistical computing. R Foundation for Statistical Computing, Vienna, Austria. ISBN 3-900051-07-0, URL <http://www.R-project.org/>.

V.A. Randall, N.V. Botchkareva NV. *The biology of hair growth* In: Ahluwalia GA, ed. Cosmetic applications of laser and light based systems.Ch 1, pp.3-35 William Andrew Inc., USA (2009).

M. Rasmussen *et al.* Ancient human genome sequence of an extinct Palaeo-Eskimo. *Nature* **463**, 757-762 (2010).

M. Rasmussen *et al.* An Aboriginal Australian genome reveals separate human dispersals into Asia. *Science* **334**, 94-98 (2011).

A.P. Rebello *et al.* *In vivo* methylation of mtDNA reveals the dynamics of protein-mtDNA interactions. *Nucleic Acids Res.* **37**, 6701-6715 (2009).

D. Reich *et al.* Genetic history of an archaic hominin group from Denisova Cave in Siberia. *Nature* **468**, 1053-1060 (2010).

J. Roessler, O. Ammerpohl, J. Gutwein, B. Hasemeier, S.L. Anwar, H. Kreipe, U. Lehmann. Quantitative cross-validation and content analysis of the 450k DNA methylation array from Illumina. Inc. *BMC Res Notes* **5**, 210 (2012).

N. Rohland, M. Hofreiter. Ancient DNA extraction from bones and teeth. *Nat. Protoc.* **2**, 1756-1762 (2007)

D.E. Schones *et al.* Dynamic regulation of nucleosome positioning in the human genome. *Cell* **132**, 887-898 (2008).

M Schubert *et al.* Improving ancient DNA read mapping against modern reference genomes. *BMC Genomics* **13**, 178 (2012).

R.C. Sliker *et al.* Identification and systematic annotation of tissue-specific differentially methylated regions using the Illumina 450k array. *Epigenetics Chromatin* **6**, 26 (2013).

A.F.A. Smit,, R. Hubley, P. Green. RepeatMasker Open-3.0. <http://www.repeatmasker.org>. 1996-2010. Stiller, M *et al.* Patterns of nucleotide misincorporations during enzymatic amplification and direct large-scale sequencing of ancient DNA. *Proc. Natl. Acad. Sci. USA* **103**, 13578-13584 (2006).

R. Straussman *et al.* Developmental programming of CpG island methylation profiles in the human genome. *Nat. Struct. Mol. Biol.* **16**, 564-571 (2009).

A. Valouev *et al.* Determinants of nucleosome organization in primary human cells. *Nature* **474**, 516-520 (2011).

M. Weber *et al.* Distribution, silencing potential and evolutionary impact of promoter DNA methylation in the human genome. *Nat. Genetics* **39**, 457-466 (2007).

A.O. Zalensky *et al.* Human testis/sperm-specific histone H2B (hTSH2B): molecular cloning and characterization. *J. Biol. Chem.* **277**, 43474-43480 (2002).
